# Supplementary material for: Peptidoglycan recycling is critical for cell division, cell wall integrity, and β-lactam resistance in Caulobacter crescentus
Source: eLife. 2026 Apr 2;14:RP109465. doi: 10.7554/eLife.109465 (PMC13046382; doi:10.7554/eLife.109465)
Supplement: Supplementary file 4. — The spreadsheets show the data underlying the volcano plots in Figure 5D, Figure 8D, Figure 8—figure supplement 1C and Figure 8—figure supplement 2. [file elife-109465-supp4.xlsx]

## Sheet: Fig. 5D
							Number of peptide precursors measured						Number of Razor peptide precursors						Normalized Log2 Quantity/Intensity						Normalized and Imputed Log2 Quantity/Intensity						Imputed Log2 MeanIntensity		Coefficient of Variation (CV)		log2 Ratio	p Value	-log10 (p Value)	q Value	-log10 (q Value)
							WT in M2G			WT in M2G + GlcNAc			WT in M2G			WT in M2G + GlcNAc			WT in M2G			WT in M2G + GlcNAc			WT in M2G			WT in M2G + GlcNAc
Protein ID	ac	RazorP	RazorG	Protein description	Global.PG.Q.Value	nbPeptides	#1	#2	#3	#1	#2	#3	#1	#2	#3	#1	#2	#3	#1	#2	#3	#1	#2	#3	#1	#2	#3	#1	#2	#3	WT in M2G	WT in M2G + GlcNAc	WT in M2G	WT in M2G + GlcNAc	WT in M2G + GlcNAc	WT in M2G + GlcNAc	WT in M2G + GlcNAc	WT in M2G + GlcNAc	WT in M2G + GlcNAc
A0A0H3C2I0	A0A0H3C2I0_CAUVN			Dephospho-CoA kinase	0.000348797	19	17	18	18	17	18	17							25.9749	25.9261	25.8917	26.2566	26.128	26.2296	25.9749	25.9261	25.8917	26.2566	26.128	26.2296	25.9313	26.2058	0.001612	0.00258805	0.274491	0.00419071	2.37771	0.025837	1.58776
A0A0H3C2I6	A0A0H3C2I6_CAUVN			DNA mismatch repair protein MutS	0.000348797	44	37	37	36	40	40	41							26.9778	26.9893	27.0134	27.514	27.4397	27.4624	26.9778	26.9893	27.0134	27.514	27.4397	27.4624	26.9936	27.4724	0.000672549	0.00138524	0.478753	9.88526e-05	4.00501	0.00339357	2.46934
A0A0H3C2J2	A0A0H3C2J2_CAUVN			Molybdopterin-guanine dinucleotide biosynthesis protein A	0.000348797	6	6	6	6	5	5	5							23.4823	23.3965	23.1305	23.1723	23.1043	23.0345	23.4823	23.3965	23.1305	23.1723	23.1043	23.0345	23.3441	23.1048	0.00786052	0.0029825	-0.239276	0.0748911	1.12557	0.169865	0.769896
A0A0H3C2J6	A0A0H3C2J6_CAUVN			Precorrin-2 dehydrogenase	0.000348797	16	15	16	16	15	14	16							25.5026	25.3739	25.5592	25.8032	25.8573	25.7164	25.5026	25.3739	25.5592	25.8032	25.8573	25.7164	25.4806	25.7935	0.00372713	0.00275455	0.31282	0.00617932	2.20906	0.0333352	1.4771
A0A0H3C2K6	A0A0H3C2K6_CAUVN			Esterase lipase family protein	0.000348797	6	5	6	5	4	6	5							23.4423	23.5142	23.3248	22.8976	23.0169	22.9517	23.4423	23.5142	23.3248	22.8976	23.0169	22.9517	23.4292	22.9562	0.00408233	0.00260209	-0.473021	0.000785664	3.10476	0.0105488	1.97679
A0A0H3C2L2	A0A0H3C2L2_CAUVN			RNA-binding protein, YlxR family	0.000348797	9	9	9	8	9	8	9							24.6939	24.5989	24.5692	24.6861	24.6544	24.7237	24.6939	24.5989	24.5692	24.6861	24.6544	24.7237	24.6216	24.6883	0.00264547	0.00140588	0.0667241	0.278425	0.555291	0.414101	0.382893
A0A0H3C2M1	A0A0H3C2M1_CAUVN			Ferric uptake regulation protein	0.000348797	14	13	11	13	12	12	13							27.531	27.4753	27.4615	27.7514	27.5216	27.7276	27.531	27.4753	27.4615	27.7514	27.5216	27.7276	27.4896	27.6705	0.00133829	0.00456796	0.180902	0.0669724	1.1741	0.156845	0.804529
A0A0H3C2M5	A0A0H3C2M5_CAUVN			Cytochrome p450	0.000348797	7	7	6	6	4	4	5							23.4661	23.4249	22.8502	22.4823	22.9856	22.8355	23.4661	23.4249	22.8502	22.4823	22.9856	22.8355	23.2731	22.7829	0.014811	0.0113488	-0.490219	0.0741633	1.12981	0.168457	0.773512
A0A0H3C2M9	A0A0H3C2M9_CAUVN			Rieske (2Fe-2S) domain protein	0.000348797	3	3	2	2	2	2	2							21.8234	21.8219	21.8732	22.0776	22.1544	22.152	21.8234	21.8219	21.8732	22.0776	22.1544	22.152	21.8397	22.1284	0.00133704	0.00197326	0.288746	0.0016227	2.78976	0.0147884	1.83008
A0A0H3C2N3	A0A0H3C2N3_CAUVN			Uncharacterized protein	0.000348797	14	14	14	14	12	13	13							26.7039	26.699	26.7814	26.4882	26.4687	26.5065	26.7039	26.699	26.7814	26.4882	26.4687	26.5065	26.7286	26.4879	0.00172916	0.000714666	-0.240739	0.00358448	2.44557	0.0237323	1.62466
A0A0H3C2N9	A0A0H3C2N9_CAUVN			Acyl-CoA dehydrogenase, long-chain specific	0.000348797	11	7	9	8	8	9	11							24.2738	24.4808	24.2659	24.6255	24.5146	24.7065	24.2738	24.4808	24.2659	24.6255	24.5146	24.7065	24.3437	24.6177	0.00500654	0.0039144	0.274004	0.0230335	1.63764	0.0792531	1.10098
A0A0H3C2P3	A0A0H3C2P3_CAUVN			Phosphoglucomutase/phosphomannomutase	0.000348797	44	41	42	40	39	41	37							27.1724	27.1189	27.0534	27.2626	27.3239	27.2233	27.1724	27.1189	27.0534	27.2626	27.3239	27.2233	27.1157	27.2705	0.0021976	0.00185881	0.154774	0.0393873	1.40464	0.110175	0.957917
A0A0H3C2P9	A0A0H3C2P9_CAUVN			HerA helicase-related ATPase	0.000348797	19	18	16	17	17	18	17							26.9328	26.9413	26.8097	27.0433	26.9712	26.9066	26.9328	26.9413	26.8097	27.0433	26.9712	26.9066	26.8959	26.9748	0.00273872	0.0025347	0.0789378	0.276448	0.558386	0.41242	0.38466
A0A0H3C2R0	A0A0H3C2R0_CAUVN			Uncharacterized protein	0.000348797	3	3	3	2	2	2	3							23.9928	24.0647	20.0611	20.1428	20.4055	23.8882	23.9928	24.0647	20.0611	20.1428	20.4055	23.8882	23.4896	22.5224	0.100897	0.0973385	-0.967232	0.457668	0.33945	0.578418	0.237758
A0A0H3C2R7	A0A0H3C2R7_CAUVN			Gamma-glutamyltranspeptidase	0.000348797	18	18	17	18	14	15	18							26.1195	26.0779	26.0703	25.8297	25.778	25.7015	26.1195	26.0779	26.0703	25.8297	25.778	25.7015	26.0894	25.7707	0.00101523	0.00250246	-0.318698	0.00156402	2.80576	0.014596	1.83577
A0A0H3C2S2	A0A0H3C2S2_CAUVN			RNA-binding protein ProXp-ala	0.000348797	9	6	9	8	8	7	8							23.4645	25.2536	25.2429	25.4132	25.1502	25.4004	23.4645	25.2536	25.2429	25.4132	25.1502	25.4004	24.8589	25.3262	0.0417734	0.00585678	0.467319	0.248577	0.60454	0.382942	0.416866
A0A0H3C2S9	A0A0H3C2S9_CAUVN			TolB protein	0.000348797	69	65	66	66	64	62	66							28.8827	28.8973	28.9154	28.8138	28.6306	28.6755	28.8827	28.8973	28.9154	28.8138	28.6306	28.6755	28.8985	28.7088	0.000566537	0.00332655	-0.189774	0.0272542	1.56457	0.0881534	1.05476
A0A0H3C2T4	A0A0H3C2T4_CAUVN			Uncharacterized protein	0.000348797	11	11	11	11	11	10	11							24.7349	24.6114	24.7251	24.3509	24.3554	24.4004	24.7349	24.6114	24.7251	24.3509	24.3554	24.4004	24.6915	24.3691	0.00277873	0.00112477	-0.322448	0.00170044	2.76944	0.0152434	1.81692
A0A0H3C2U3	A0A0H3C2U3_CAUVN			Glutathione S-transferase	0.000348797	2	2	2	2	2	2	2							23.0247	23.0363	22.9092	22.3499	22.1285	22.3156	23.0247	23.0363	22.9092	22.3499	22.1285	22.3156	22.9912	22.2679	0.00305639	0.00535195	-0.723312	0.000180358	3.74387	0.00467623	2.3301
A0A0H3C2U8	A0A0H3C2U8_CAUVN			Surface protein	0.000348797	2	2	2	2	2	2	2							20.2723	20.061	19.4636	19.793	20.5824	20.2163	20.2723	20.061	19.4636	19.793	20.5824	20.2163	19.9711	20.2328	0.0210443	0.0195581	0.26174	0.397166	0.401028	0.52638	0.278701
A0A0H3C2V3	A0A0H3C2V3_CAUVN			Magnesium chelatase subunit ChlI-like ATPase	0.000348797	22	21	22	20	20	22	20							26.1899	26.2739	26.1065	25.9745	26.1439	25.9084	26.1899	26.2739	26.1065	25.9745	26.1439	25.9084	26.1917	26.0124	0.00319631	0.00466984	-0.179314	0.0803797	1.09485	0.178812	0.747603
A0A0H3C2V8	A0A0H3C2V8_CAUVN			dITP/XTP pyrophosphatase	0.000348797	12	10	10	9	10	10	11							25.5558	25.3818	25.2414	25.5156	25.5892	25.659	25.5558	25.3818	25.2414	25.5156	25.5892	25.659	25.3988	25.5891	0.00620314	0.0028022	0.190364	0.0924533	1.03408	0.195179	0.709567
A0A0H3C2W3	A0A0H3C2W3_CAUVN			PDZ domain family protein	0.000348797	12	11	12	9	12	11	10							24.5305	25.7371	25.3122	26.104	26.1679	25.0036	24.5305	25.7371	25.3122	26.104	26.1679	25.0036	25.2752	25.8477	0.0242926	0.0254108	0.57246	0.256166	0.591479	0.391638	0.407115
A0A0H3C2Y0	A0A0H3C2Y0_CAUVN			Type II secretion pathway protein C	0.000348797	5	4	4	4	4	5	5							20.6329	20.8259	20.8919	20.5638	21.3215	21.1891	20.6329	20.8259	20.8919	20.5638	21.3215	21.1891	20.7877	21.0606	0.00647506	0.0192473	0.27291	0.30962	0.509171	0.444987	0.351653
A0A0H3C2Y8	A0A0H3C2Y8_CAUVN			Type II secretion pathway protein M	0.000348797	5	5	5	5	4	5	5							23.0875	22.8956	23.0511	23.1609	23.2627	23.2774	23.0875	22.8956	23.0511	23.1609	23.2627	23.2774	23.0138	23.2346	0.00443044	0.00273165	0.220838	0.0257163	1.58979	0.0853726	1.06868
A0A0H3C2Z3	A0A0H3C2Z3_CAUVN			Guanine-hypoxanthine permease	0.000348797	2	1	1	2	1	2	1							20.1909	20.3228	20.8196	18.9192	20.2333	20.0584	20.1909	20.3228	20.8196	18.9192	20.2333	20.0584	20.4706	19.8424	0.0162176	0.0361542	-0.628229	0.126031	0.899524	0.240517	0.618854
A0A0H3C2Z8	A0A0H3C2Z8_CAUVN			N-acetylglutamate synthase domain protein	0.000348797	3	3	3	3	3	3	3							22.687	22.753	22.6804	22.973	22.8629	23.0055	22.687	22.753	22.6804	22.973	22.8629	23.0055	22.7071	22.9484	0.00176807	0.0032585	0.24129	0.00847345	2.07194	0.0412875	1.38418
A0A0H3C302	A0A0H3C302_CAUVN			tRNA (guanine-N(1)-)-methyltransferase	0.000348797	10	10	10	10	10	10	10							24.4585	24.494	24.3039	24.7186	24.6718	24.5285	24.4585	24.494	24.3039	24.7186	24.6718	24.5285	24.4211	24.6419	0.00413945	0.00402101	0.220761	0.0394514	1.40394	0.110252	0.957612
A0A0H3C318	A0A0H3C318_CAUVN			Ribosomal-protein-alanine acetyltransferase	0.00202293	2	2	2	1	2	2	1							22.0295	21.9378	21.5038	22.7297	22.6483	22.2114	22.0295	21.9378	21.5038	22.7297	22.6483	22.2114	21.8412	22.5471	0.0128677	0.0123713	0.70586	0.0146498	1.83417	0.0586185	1.23197
A0A0H3C324	A0A0H3C324_CAUVN			Uncharacterized protein	0.000348797	12	12	11	10	11	12	11							25.6381	25.5766	24.9362	25.858	25.9277	26.2062	25.6381	25.5766	24.9362	25.858	25.9277	26.2062	25.4166	26.0053	0.0153144	0.00708657	0.588681	0.0335169	1.47474	0.100054	0.999766
A0A0H3C334	A0A0H3C334_CAUVN			tRNA-specific adenosine deaminase	0.000348797	4	2	1	2	2	1	1							17.6561	14.7595	18.4147	19.8944	19.2489	16.2519	17.6561	14.7595	18.4147	19.8944	19.2489	16.2519	17.57	19.0913	0.113849	0.105261	1.52133	0.308922	0.510151	0.444407	0.35222
A0A0H3C339	A0A0H3C339_CAUVN			Uncharacterized protein	0.000348797	26	24	25	22	21	22	22							25.1029	24.8977	24.6497	24.571	24.5719	24.6525	25.1029	24.8977	24.6497	24.571	24.5719	24.6525	24.8953	24.599	0.00911999	0.00190348	-0.296287	0.0630239	1.20049	0.151709	0.818988
A0A0H3C344	A0A0H3C344_CAUVN			Phosphocarrier protein HPr	0.000348797	2	2	2	2	2	2	2							24.6559	24.7154	24.8576	24.8814	24.7315	24.6429	24.6559	24.7154	24.8576	24.8814	24.7315	24.6429	24.7455	24.7553	0.00418912	0.00487107	0.00979085	0.924169	0.0342484	0.949862	0.0223396
A0A0H3C350	A0A0H3C350_CAUVN			Sensor histidine protein kinase	0.000348797	11	10	10	11	9	11	10							24.6259	24.6911	24.7459	24.3697	24.4607	24.649	24.6259	24.6911	24.7459	24.3697	24.4607	24.649	24.6885	24.4979	0.00243382	0.00581586	-0.190587	0.0725644	1.13928	0.165322	0.781669
A0A0H3C356	A0A0H3C356_CAUVN			Aspartate-semialdehyde dehydrogenase	0.000348797	39	38	39	39	38	39	39							29.7852	29.8105	29.8294	30.4393	30.3307	30.3079	29.7852	29.8105	29.8294	30.4393	30.3307	30.3079	29.8085	30.3604	0.000744715	0.0023139	0.551961	0.000113788	3.9439	0.0035695	2.44739
A0A0H3C362	A0A0H3C362_CAUVN			Uncharacterized protein	0.000348797	4	4	4	4	4	4	4							22.4606	22.5182	22.7497	22.8063	22.7623	22.7032	22.4606	22.5182	22.7497	22.8063	22.7623	22.7032	22.5817	22.7579	0.00677829	0.00227176	0.176219	0.0972641	1.01205	0.20161	0.695487
A0A0H3C369	A0A0H3C369_CAUVN			C4-dicarboxylate transport protein	0.000348797	5	4	5	5	5	5	5							25.1149	25.3315	25.3587	25.2969	25.0348	25.2534	25.1149	25.3315	25.3587	25.2969	25.0348	25.2534	25.2724	25.1995	0.00528616	0.00557695	-0.072903	0.513406	0.289539	0.630904	0.200037
A0A0H3C372	A0A0H3C372_CAUVN			Uncharacterized protein	0.000348797	2	2	2	2	2	2	2							24.9955	24.9974	24.763	25.3936	25.2196	25.2558	24.9955	24.9974	24.763	25.3936	25.2196	25.2558	24.9227	25.2916	0.00540977	0.00363123	0.368894	0.00809757	2.09165	0.0401587	1.39622
A0A0H3C375	A0A0H3C375_CAUVN			NAD(P)H-quinone reductase	0.000348797	3	3	3	3	1	1	2							22.3949	22.2548	21.2977	20.5369	19.3887	20.8622	22.3949	22.2548	21.2977	20.5369	19.3887	20.8622	22.0578	20.3871	0.0271644	0.0382016	-1.67074	0.0143728	1.84246	0.0579708	1.23679
A0A0H3C379	A0A0H3C379_CAUVN			Photosensory histidine protein kinase LovK	0.000348797	34	34	34	34	30	32	31							27.0037	26.8864	26.9435	26.7666	26.7526	26.7502	27.0037	26.8864	26.9435	26.7666	26.7526	26.7502	26.9453	26.7565	0.00217715	0.000330118	-0.188834	0.0128196	1.89212	0.0536401	1.27051
A0A0H3C383	A0A0H3C383_CAUVN			Phosphate transport system permease protein	0.000348797	5	4	4	4	5	4	4							23.4309	23.551	23.5925	23.8358	23.5056	23.7991	23.4309	23.551	23.5925	23.8358	23.5056	23.7991	23.5264	23.7209	0.00356734	0.00763029	0.194457	0.134736	0.870516	0.250794	0.600684
A0A0H3C388	A0A0H3C388_CAUVN			Phosphoribosylamine--glycine ligase	0.000348797	31	30	28	28	29	27	29							27.9607	27.7862	27.9997	27.9773	27.9889	27.9504	27.9607	27.7862	27.9997	27.9773	27.9889	27.9504	27.9185	27.9723	0.00407281	0.000705801	0.053812	0.459259	0.337942	0.579784	0.236734
A0A0H3C394	A0A0H3C394_CAUVN			Cobalt-zinc-cadmium resistance protein czcD	0.00463423	1	1	1	1	1	0	0							19.2401	18.362	17.1078	17.4298	NA	NA	19.2401	18.362	17.1078	17.4298	19.6303	17.8695	18.4807	18.6424	0.0587656	0.0635972	0.161741	0.928961	0.0320025	0.952602	0.0210884
A0A0H3C399	A0A0H3C399_CAUVN			3'-phosphoadenosine-5'-phosphosulfate (PAPS) 3'-phosphatase family protein	0.000348797	11	10	9	10	10	10	10							24.3041	24.1764	24.3111	24.4645	24.4995	24.4815	24.3041	24.1764	24.3111	24.4645	24.4995	24.4815	24.2652	24.4819	0.00312431	0.000713226	0.216731	0.0107477	1.96868	0.0475385	1.32295
A0A0H3C3A6	A0A0H3C3A6_CAUVN			3-polyprenyl-4-hydroxybenzoate decarboxylase	0.000348797	28	25	27	26	21	27	26							26.4443	26.4461	26.4565	26.5349	26.7148	26.7546	26.4443	26.4461	26.4565	26.5349	26.7148	26.7546	26.449	26.6712	0.000249656	0.00438903	0.222258	0.0255662	1.59233	0.0851548	1.06979
A0A0H3C3B1	A0A0H3C3B1_CAUVN			Low-affinity zinc transport protein	0.000348797	24	20	22	20	22	23	22							27.6714	27.6499	27.6718	27.9523	27.938	27.8819	27.6714	27.6499	27.6718	27.9523	27.938	27.8819	27.6644	27.9244	0.000453657	0.0013318	0.259967	0.00197299	2.70487	0.016636	1.77895
A0A0H3C3B5	A0A0H3C3B5_CAUVN			Molybdenum-pterin binding protein mopB	0.000348797	5	5	4	5	5	4	3							22.2527	22.0513	22.1484	21.7775	22.0345	21.7592	22.2527	22.0513	22.1484	21.7775	22.0345	21.7592	22.1532	21.8626	0.00454654	0.00704204	-0.290508	0.0297186	1.52697	0.0931327	1.0309
A0A0H3C3C4	A0A0H3C3C4_CAUVN			Succinate--CoA ligase [ADP-forming] subunit alpha	0.000348797	39	38	37	37	38	39	35							30.7835	30.7552	30.7079	31.1712	30.9048	30.9414	30.7835	30.7552	30.7079	31.1712	30.9048	30.9414	30.7492	31.0107	0.00124272	0.00465686	0.261468	0.0266528	1.57426	0.0870467	1.06025
A0A0H3C3C8	A0A0H3C3C8_CAUVN			Dihydrolipoyl dehydrogenase	0.000348797	75	72	69	71	73	75	74							31.0827	31.0473	31.1062	31.7041	31.69	31.6132	31.0827	31.0473	31.1062	31.7041	31.69	31.6132	31.0789	31.6697	0.000953978	0.0015445	0.59074	4.89262e-05	4.31046	0.00230947	2.63649
A0A0H3C3D4	A0A0H3C3D4_CAUVN			Primosomal protein N'	0.000348797	20	18	20	19	18	20	19							24.4594	24.5613	24.1761	24.3772	24.4336	24.6676	24.4594	24.5613	24.1761	24.3772	24.4336	24.6676	24.408	24.4984	0.00818165	0.00628586	0.0904016	0.505829	0.295996	0.623464	0.205189
A0A0H3C3D8	A0A0H3C3D8_CAUVN			Outer membrane protein	0.000348797	18	17	17	18	16	17	17							26.7225	26.6772	26.4897	26.6397	26.5612	26.6096	26.7225	26.6772	26.4897	26.6397	26.5612	26.6096	26.6333	26.6039	0.00463478	0.00148789	-0.0294124	0.745247	0.1277	0.813251	0.0897753
A0A0H3C3E4	A0A0H3C3E4_CAUVN			Hot dog superfamily thioesterase	0.000348797	18	18	18	18	15	16	17							25.6346	25.5867	25.6239	25.4225	25.5968	25.4872	25.6346	25.5867	25.6239	25.4225	25.5968	25.4872	25.6152	25.5039	0.000982182	0.00345506	-0.111262	0.124104	0.906213	0.238195	0.623067
A0A0H3C3F1	A0A0H3C3F1_CAUVN			Phosphonates import ATP-binding protein PhnC	0.000348797	22	19	19	19	17	19	20							26.2143	26.1364	26.3182	26.2961	26.3513	26.3221	26.2143	26.1364	26.3182	26.2961	26.3513	26.3221	26.2249	26.3233	0.00347936	0.00105028	0.09844	0.170629	0.767948	0.295398	0.529593
A0A0H3C3F7	A0A0H3C3F7_CAUVN			ATP synthase subunit b	0.000348797	28	28	27	26	28	28	27							30.5393	30.5552	30.5583	30.9162	30.6922	30.6577	30.5393	30.5552	30.5583	30.9162	30.6922	30.6577	30.5509	30.76	0.000333794	0.00456417	0.209056	0.0502107	1.2992	0.130652	0.883885
A0A0H3C3G8	A0A0H3C3G8_CAUVN			Glucan endo-1,3-beta-glucosidase	0.0010142	4	4	4	4	2	2	3							20.9093	20.4787	20.8485	18.6103	19.9657	20.4487	20.9093	20.4787	20.8485	18.6103	19.9657	20.4487	20.7577	19.8602	0.0112349	0.048441	-0.897448	0.0751069	1.12432	0.170089	0.769325
A0A0H3C3H4	A0A0H3C3H4_CAUVN			Aminomethyltransferase family protein	0.000348797	14	13	13	12	12	12	13							25.3637	25.2742	25.2633	25.5542	25.3663	25.2991	25.3637	25.2742	25.2633	25.5542	25.3663	25.2991	25.3011	25.4106	0.00217763	0.00520482	0.109481	0.251217	0.599951	0.385829	0.413605
A0A0H3C3I1	A0A0H3C3I1_CAUVN			YCII-related domain protein	0.000348797	5	5	5	5	5	5	5							23.997	24.1019	24.073	24.0928	24.0818	23.9061	23.997	24.1019	24.073	24.0928	24.0818	23.9061	24.0579	24.0294	0.00225236	0.00435942	-0.028564	0.689901	0.161213	0.774545	0.110953
A0A0H3C3I8	A0A0H3C3I8_CAUVN			Zinc metallohydrolase, glyoxalase II family	0.000348797	12	12	12	10	12	11	10							24.6525	24.6615	24.38	24.2941	24.1842	24.3522	24.6525	24.6615	24.38	24.2941	24.1842	24.3522	24.5705	24.2785	0.00651389	0.00351412	-0.291959	0.030645	1.51364	0.0950497	1.02205
A0A0H3C3K6	A0A0H3C3K6_CAUVN			DNA polymerase III subunit epsilon	0.000348797	10	8	7	9	8	8	10							23.2532	22.9268	23.4689	23.3	23.0869	23.2312	23.2532	22.9268	23.4689	23.3	23.0869	23.2312	23.2332	23.2087	0.0117561	0.00468558	-0.024524	0.948297	0.0230557	0.963932	0.0159537
A0A0H3C3K7	A0A0H3C3K7_CAUVN			Type 1 glutamine amidotransferase (GATase1) domain protein	0.000348797	3	3	3	3	2	3	2							23.1985	23.1489	23.1089	22.8383	23.1597	22.9721	23.1985	23.1489	23.1089	22.8383	23.1597	22.9721	23.1526	22.9961	0.00193915	0.00702229	-0.1565	0.137686	0.861109	0.254093	0.595007
A0A0H3C3L0	A0A0H3C3L0_CAUVN			Molybdenum cofactor biosynthesis protein B	0.000348797	13	13	13	12	13	13	12							25.7776	25.7098	25.5757	25.8988	26.0043	25.8806	25.7776	25.7098	25.5757	25.8988	26.0043	25.8806	25.6901	25.929	0.00400014	0.00257666	0.238846	0.0202325	1.69395	0.0733761	1.13445
A0A0H3C3L3	A0A0H3C3L3_CAUVN			Uncharacterized protein	0.000348797	2	2	2	1	1	1	2							22.3617	21.5153	21.2836	21.2373	21.9515	22.3652	22.3617	21.5153	21.2836	21.2373	21.9515	22.3652	21.7981	21.9232	0.026128	0.0261125	0.125041	0.75569	0.121656	0.821553	0.0853642
A0A0H3C3L7	A0A0H3C3L7_CAUVN			Major facilitator superfamily transporter	0.000348797	11	10	11	11	9	9	10							26.8171	26.995	27.2478	26.7762	26.7629	26.9	26.8171	26.995	27.2478	26.7762	26.7629	26.9	27.0309	26.8143	0.00801069	0.00281996	-0.216564	0.143519	0.84309	0.261188	0.583047
A0A0H3C3L9	A0A0H3C3L9_CAUVN			Ribonuclease T2	0.000348797	5	4	5	4	5	4	4							23.6025	24.0528	23.957	23.9855	23.91	23.6363	23.6025	24.0528	23.957	23.9855	23.91	23.6363	23.8834	23.8516	0.00993783	0.00770566	-0.03179	0.868608	0.0611761	0.90987	0.0410206
A0A0H3C3M3	A0A0H3C3M3_CAUVN			Uncharacterized protein	0.000348797	7	7	7	7	6	5	6							23.8754	23.885	23.991	23.2969	23.5156	23.692	23.8754	23.885	23.991	23.2969	23.5156	23.692	23.9181	23.5105	0.00268195	0.008422	-0.40762	0.0116204	1.93478	0.0500076	1.30096
A0A0H3C3M7	A0A0H3C3M7_CAUVN			Transcription termination/antitermination protein NusA	0.000348797	53	51	49	48	47	46	49							30.1936	30.1328	30.1612	30.2576	30.158	30.1832	30.1936	30.1328	30.1612	30.2576	30.158	30.1832	30.1628	30.2002	0.00100858	0.00171504	0.03745	0.504388	0.297235	0.622196	0.206073
A0A0H3C3N0	A0A0H3C3N0_CAUVN			Apolipoprotein N-acyltransferase	0.000348797	8	7	7	6	6	7	8							23.2957	23.3189	22.9928	23.857	23.9394	24.1143	23.2957	23.3189	22.9928	23.857	23.9394	24.1143	23.2099	23.9743	0.00784163	0.00548159	0.764321	0.000961668	3.01697	0.0112521	1.94877
A0A0H3C3N4	A0A0H3C3N4_CAUVN			Ribosomal-protein-S18-alanine acetyltransferase	0.000348797	4	3	4	4	4	4	4							23.3271	23.1096	23.0294	23.2127	23.2511	23.2802	23.3271	23.1096	23.0294	23.2127	23.2511	23.2802	23.161	23.2483	0.00665265	0.00145623	0.0873189	0.34146	0.46666	0.474931	0.323369
A0A0H3C3N8	A0A0H3C3N8_CAUVN			Tryptophan--tRNA ligase	0.000348797	29	27	27	27	29	27	28							28.04	27.9718	27.985	28.174	28.0531	28.061	28.04	27.9718	27.985	28.174	28.0531	28.061	27.9992	28.0971	0.00129142	0.00240765	0.0978965	0.144115	0.841291	0.261798	0.582033
A0A0H3C3P2	A0A0H3C3P2_CAUVN			Uncharacterized protein	0.000348797	6	5	5	5	5	6	5							22.1442	22.3151	22.5479	22.6185	22.9657	23.0611	22.1442	22.3151	22.5479	22.6185	22.9657	23.0611	22.3452	22.894	0.00907352	0.0101798	0.548749	0.0160631	1.79417	0.0629399	1.20107
A0A0H3C3P4	A0A0H3C3P4_CAUVN			YciI-like protein	0.000348797	4	4	4	4	4	4	4							26.4129	26.3725	26.4347	26.7577	26.5669	26.5242	26.4129	26.3725	26.4347	26.7577	26.5669	26.5242	26.4069	26.6199	0.00119661	0.00466998	0.21297	0.0371309	1.43026	0.106526	0.972543
A0A0H3C3P6	A0A0H3C3P6_CAUVN			Uncharacterized protein	0.000348797	5	5	5	5	5	5	5							23.3882	23.3599	23.2947	23.1212	22.9863	23.1925	23.3882	23.3599	23.2947	23.1212	22.9863	23.1925	23.3481	23.1025	0.00205179	0.00453302	-0.245609	0.0153345	1.81433	0.0606355	1.21727
A0A0H3C3P8	A0A0H3C3P8_CAUVN			HemY domain membrane protein	0.000348797	33	30	33	30	32	31	30							27.269	27.3665	27.3178	27.2324	27.1079	27.2585	27.269	27.3665	27.3178	27.2324	27.1079	27.2585	27.3183	27.2011	0.00178611	0.00295909	-0.117267	0.11492	0.939606	0.226466	0.644997
A0A0H3C3Q3	A0A0H3C3Q3_CAUVN			Acyl-CoA dehydrogenase	0.000348797	29	26	26	26	25	28	27							27.8695	27.8166	27.8337	28.1844	28.1704	28.206	27.8695	27.8166	27.8337	28.1844	28.1704	28.206	27.8401	28.187	0.000969983	0.000635702	0.34688	0.000415281	3.38166	0.00708792	2.14948
A0A0H3C3Q5	A0A0H3C3Q5_CAUVN			Amino acid transporter	0.000348797	11	10	7	8	6	7	8							24.2511	24.4237	24.5786	24.2809	24.3361	24.2397	24.2511	24.4237	24.5786	24.2809	24.3361	24.2397	24.424	24.2861	0.00670906	0.00199225	-0.137879	0.216555	0.664432	0.346511	0.460283
A0A0H3C3Q7	A0A0H3C3Q7_CAUVN			Bifunctional purine biosynthesis protein PurH	0.000348797	55	55	54	55	55	55	54							30.1019	30.0986	30.1547	30.7496	30.7146	30.7484	30.1019	30.0986	30.1547	30.7496	30.7146	30.7484	30.1186	30.7376	0.00104607	0.000645416	0.619019	2.27297e-05	4.64341	0.00152317	2.81725
A0A0H3C3R0	A0A0H3C3R0_CAUVN			STAS domain protein	0.000348797	9	7	7	7	7	7	7							25.9735	25.9877	25.7141	25.8519	25.6894	25.775	25.9735	25.9877	25.7141	25.8519	25.6894	25.775	25.8971	25.7736	0.00594737	0.00315472	-0.123504	0.263941	0.578493	0.39958	0.398396
A0A0H3C3R3	A0A0H3C3R3_CAUVN			MHYT/PAS-family GGDEF/EAL protein	0.000348797	4	4	4	3	2	2	2							21.6966	22.0835	21.283	19.1851	19.8634	20.5375	21.6966	22.0835	21.283	19.1851	19.8634	20.5375	21.7243	19.9657	0.018458	0.0340452	-1.75861	0.00443688	2.35292	0.0267541	1.57261
A0A0H3C3R5	A0A0H3C3R5_CAUVN			Protein-glutamate methylesterase/protein-glutamine glutaminase	0.000348797	28	27	25	25	24	26	25							28.6343	28.601	28.5823	28.5509	28.3926	28.4891	28.6343	28.601	28.5823	28.5509	28.3926	28.4891	28.606	28.479	0.000920566	0.00280317	-0.127035	0.0788853	1.103	0.176267	0.75383
A0A0H3C3R6	A0A0H3C3R6_CAUVN			WecG/TagA-family glycosyltransferase HfsJ	0.000348797	6	5	5	4	5	4	5							21.8824	22.4621	22.0031	22.2886	21.8048	22.2634	21.8824	22.4621	22.0031	22.2886	21.8048	22.2634	22.1381	22.1354	0.0138308	0.0123131	-0.00271296	0.988705	0.0049332	0.990344	0.00421381
A0A0H3C3S0	A0A0H3C3S0_CAUVN			TonB-dependent receptor	0.000348797	34	34	34	33	31	28	29							27.0522	27.0529	26.9859	26.6323	26.4935	26.5152	27.0522	27.0529	26.9859	26.6323	26.4935	26.5152	27.0307	26.5483	0.00142364	0.00281204	-0.482382	0.000303263	3.51818	0.00625003	2.20412
A0A0H3C3S1	FZLC_CAUVN			FtsZ-localized protein C	0.000348797	24	24	24	24	21	22	23							26.2662	25.955	26.2497	26.4106	26.2744	25.7381	26.2662	25.955	26.2497	26.4106	26.2744	25.7381	26.1639	26.169	0.00669502	0.0136011	0.0050962	0.939666	0.0270264	0.958519	0.0183991
A0A0H3C3S4	A0A0H3C3S4_CAUVN			Beta-N-acetylhexosaminidase	0.000348797	64	27	24	26	63	61	64							26.1672	25.7494	26.1629	31.0233	30.8533	31.0056	26.1672	25.7494	26.1629	31.0233	30.8533	31.0056	26.0394	30.9627	0.00921997	0.00301798	4.92338	9.91062e-08	7.0039	3.05587e-05	4.51487
A0A0H3C3S7	A0A0H3C3S7_CAUVN			UPF0056 inner membrane protein	0.0010142	1	1	1	1	1	1	1							20.6281	20.7687	20.8541	21.2731	21.0227	21.2712	20.6281	20.7687	20.8541	21.2731	21.0227	21.2712	20.7533	21.1937	0.00549892	0.00679574	0.440444	0.00592761	2.22712	0.0324997	1.48812
A0A0H3C3T1	A0A0H3C3T1_CAUVN			Uncharacterized protein	0.000348797	18	17	18	17	14	16	15							25.0533	24.9711	24.7388	24.2564	24.4147	24.4943	25.0533	24.9711	24.7388	24.2564	24.4147	24.4943	24.9271	24.3918	0.00654586	0.00496462	-0.535292	0.00362391	2.44082	0.0237996	1.62343
A0A0H3C3T2	A0A0H3C3T2_CAUVN			GT1-family glycosyltransferase	0.000348797	22	21	19	19	20	22	21							28.2714	27.8676	28.3747	28.2181	28.2762	28.1703	28.2714	27.8676	28.3747	28.2181	28.2762	28.1703	28.1873	28.2222	0.00951196	0.00187958	0.0349107	0.735951	0.133151	0.80958	0.0917403
A0A0H3C3T5	A0A0H3C3T5_CAUVN			Glutamine--fructose-6-phosphate aminotransferase [isomerizing]	0.000348797	31	31	31	28	30	30	29							27.5473	27.6059	27.6718	27.4867	27.5519	27.4458	27.5473	27.6059	27.6718	27.4867	27.5519	27.4458	27.6092	27.4954	0.00225518	0.00194643	-0.113809	0.106485	0.972713	0.21489	0.667784
A0A0H3C3T9	A0A0H3C3T9_CAUVN			DUF1232 domain-containing protein	0.000348797	4	4	4	4	4	4	4							24.0577	23.8503	23.9551	24.4809	24.142	24.2973	24.0577	23.8503	23.9551	24.4809	24.142	24.2973	23.9569	24.3134	0.00432977	0.00697984	0.356534	0.0192382	1.71583	0.0702766	1.15319
A0A0H3C3U5	A0A0H3C3U5_CAUVN			Trypsin-like peptidase	0.000348797	12	10	10	11	11	11	11							26.0605	26.0734	26.3346	26.4456	26.4042	26.4424	26.0605	26.0734	26.3346	26.4456	26.4042	26.4424	26.1618	26.4308	0.00591146	0.000871164	0.269031	0.0237096	1.62508	0.0811548	1.09069
A0A0H3C3U6	A0A0H3C3U6_CAUVN			Uncharacterized protein	0.000348797	7	7	7	7	7	7	6							23.5036	23.2493	23.381	23.575	23.7027	23.063	23.5036	23.2493	23.381	23.575	23.7027	23.063	23.3817	23.4723	0.00543952	0.0144404	0.0905822	0.722063	0.141425	0.798737	0.097596
A0A0H3C3V4	A0A0H3C3V4_CAUVN			Glutathione synthetase	0.000348797	25	24	25	24	23	25	24							28.4298	28.4679	28.4771	28.7176	28.6654	28.6214	28.4298	28.4679	28.4771	28.7176	28.6654	28.6214	28.4584	28.6686	0.000881756	0.00167912	0.210195	0.00723956	2.14029	0.0371319	1.43025
A0A0H3C3W1	A0A0H3C3W1_CAUVN			Glutathione S-transferase	0.000348797	7	7	6	5	6	5	7							25.353	25.2076	25.1212	25.3204	25.1184	25.3648	25.353	25.2076	25.1212	25.3204	25.1184	25.3648	25.2304	25.2718	0.00464299	0.00519699	0.0413254	0.691311	0.160327	0.775223	0.110573
A0A0H3C3W3	A0A0H3C3W3_CAUVN			Uncharacterized protein	0.0010142	1	1	1	1	1	1	1							18.7481	19.1194	19.0995	17.7794	19.3089	19.7897	18.7481	19.1194	19.0995	17.7794	19.3089	19.7897	18.9988	19.1792	0.0109985	0.0553692	0.180344	0.957484	0.0188683	0.970923	0.0128151
A0A0H3C3W8	A0A0H3C3W8_CAUVN			Aspartate protease	0.000348797	4	4	3	3	3	2	2							22.6836	22.6253	20.8949	22.6611	22.196	22.192	22.6836	22.6253	20.8949	22.6611	22.196	22.192	22.2685	22.3671	0.0460524	0.0120658	0.0986087	0.610832	0.214078	0.714411	0.146052
A0A0H3C3X1	A0A0H3C3X1_CAUVN			Beta-barrel porin type 2	0.000348797	61	58	61	60	60	60	59							32.1074	32.1224	32.1605	32.2495	32.1453	32.173	32.1074	32.1224	32.1605	32.2495	32.1453	32.173	32.1303	32.19	0.000851446	0.00167664	0.0597226	0.302129	0.519808	0.439235	0.357303
A0A0H3C3X4	A0A0H3C3X4_CAUVN			Pirin	0.000348797	12	12	10	11	8	11	11							24.6688	24.4967	24.6927	23.8282	23.9406	24.1537	24.6688	24.4967	24.6927	23.8282	23.9406	24.1537	24.622	23.9805	0.0043424	0.00689622	-0.64146	0.00129791	2.88675	0.0132595	1.87747
A0A0H3C3X6	A0A0H3C3X6_CAUVN			Metallophosphatase family protein	0.000348797	18	18	18	18	18	18	18							26.9543	26.9159	26.8624	27.1775	27.2152	27.2091	26.9543	26.9159	26.8624	27.1775	27.2152	27.2091	26.9114	27.2007	0.00171539	0.000745317	0.289333	0.00150958	2.82114	0.0142672	1.84566
A0A0H3C3Y1	A0A0H3C3Y1_CAUVN			Type II secretion pathway protein D	0.000348797	20	18	15	16	17	16	16							24.629	24.6016	24.4784	24.5255	24.6679	24.1509	24.629	24.6016	24.4784	24.5255	24.6679	24.1509	24.5711	24.4641	0.00326558	0.0109234	-0.106992	0.4354	0.361111	0.559245	0.252398
A0A0H3C3Y5	A0A0H3C3Y5_CAUVN			Pyrroline-5-carboxylate reductase	0.000348797	8	7	7	8	7	8	7							24.3553	24.4186	24.4623	24.4142	24.6192	24.6799	24.3553	24.4186	24.4623	24.4142	24.6192	24.6799	24.4127	24.5755	0.00220177	0.00566592	0.162752	0.116284	0.934481	0.22826	0.641569
A0A0H3C3Z1	A0A0H3C3Z1_CAUVN			General secretion pathway protein N	0.000348797	5	5	2	3	3	3	4							21.4814	20.6446	21.1272	20.9032	21.0366	20.9752	21.4814	20.6446	21.1272	20.9032	21.0366	20.9752	21.1243	20.9727	0.0199225	0.00318413	-0.151615	0.620306	0.207394	0.722415	0.141213
A0A0H3C3Z4	A0A0H3C3Z4_CAUVN			NUP-family purine nucleoside permease	0.00134998	3	3	3	1	1	2	2							22.644	22.3696	20.471	20.6058	22.0844	21.874	22.644	22.3696	20.471	20.6058	22.0844	21.874	22.0936	21.652	0.0542128	0.0371664	-0.441595	0.681565	0.166492	0.768861	0.114152
A0A0H3C3Z5	A0A0H3C3Z5_CAUVN			Uncharacterized protein	0.000348797	2	2	2	2	2	2	2							22.1915	22.2598	22.3528	22.0605	22.1114	22.2158	22.1915	22.2598	22.3528	22.0605	22.1114	22.2158	22.2696	22.1307	0.00363671	0.00357796	-0.138883	0.100756	0.996729	0.205843	0.686463
A0A0H3C3Z8	A0A0H3C3Z8_CAUVN			Long-chain-fatty-acid--CoA ligase	0.000348797	8	8	8	8	6	6	7							24.3559	24.4053	24.1787	23.0323	23.0055	23.5994	24.3559	24.4053	24.1787	23.0323	23.0055	23.5994	24.3166	23.2394	0.00490057	0.0144489	-1.07713	0.00129258	2.88854	0.0132595	1.87747
A0A0H3C403	A0A0H3C403_CAUVN			Cupin superfamily protein	0.000348797	9	8	8	9	8	9	8							25.5046	25.4854	25.5494	25.7008	25.6506	25.5761	25.5046	25.4854	25.5494	25.7008	25.6506	25.5761	25.5134	25.6434	0.00128916	0.00244771	0.130043	0.0614779	1.21128	0.149899	0.824202
A0A0H3C404	A0A0H3C404_CAUVN	A0A0H3CD67 ;A0A0H3C404	CCNA_02820;cpaL	TadG/vWA-family protein CpaL	0.000348797	14	14	14	13	13	14	14	1	1	1	1	1	1	25.0101	25.0519	24.9189	24.8711	24.898	24.915	25.0101	25.0519	24.9189	24.8711	24.898	24.915	24.9947	24.8948	0.00272051	0.000889001	-0.0998457	0.128893	0.889771	0.24367	0.613197
A0A0H3C408	A0A0H3C408_CAUVN			Endonuclease/exonuclease/phosphatase family protein	0.000348797	8	8	8	6	6	6	6							23.0803	22.7566	22.8264	23.1472	23.1031	22.9862	23.0803	22.7566	22.8264	23.1472	23.1031	22.9862	22.8946	23.0804	0.007442	0.00360423	0.18585	0.117975	0.928209	0.230682	0.636987
A0A0H3C409	A0A0H3C409_CAUVN			Glutathione-regulated potassium-efflux system protein kefB	0.000348797	7	7	7	7	5	7	7							23.6477	23.755	23.6451	23.7923	23.7553	23.5664	23.6477	23.755	23.6451	23.7923	23.7553	23.5664	23.6835	23.708	0.00264725	0.00511262	0.0244894	0.792342	0.101087	0.851568	0.0697807
A0A0H3C413	A0A0H3C413_CAUVN			Undecaprenyl-phosphomannose:protein mannosyltransferase	0.000348797	6	6	6	6	6	6	6							24.0184	23.9805	24.0537	24.1309	23.996	24.2831	24.0184	23.9805	24.0537	24.1309	23.996	24.2831	24.0179	24.1414	0.00152336	0.00594948	0.123579	0.214357	0.668863	0.343904	0.463563
A0A0H3C418	A0A0H3C418_CAUVN			N-acetylglucosamine-6-phosphate deacetylase	0.000348797	10	1	0	0	10	10	10							22.025	NA	NA	24.6422	24.4121	24.5315	22.025	19.402	20.0874	24.6422	24.4121	24.5315	20.9494	24.5317	0.0663446	0.00469039	3.5823	0.00143726	2.84246	0.0141086	1.85052
A0A0H3C421	A0A0H3C421_CAUVN			TonB-dependent receptor	0.000348797	88	86	85	87	87	87	88							33.4832	33.4706	33.4005	33.6766	33.5345	33.5334	33.4832	33.4706	33.4005	33.6766	33.5345	33.5334	33.4519	33.5831	0.00133273	0.00245281	0.131212	0.0888	1.05159	0.191072	0.718803
A0A0H3C423	A0A0H3C423_CAUVN			TonB-dependent receptor	0.000348797	33	14	13	10	32	32	33							24.4324	25.3276	24.7361	27.4667	27.4041	27.338	24.4324	25.3276	24.7361	27.4667	27.4041	27.338	24.881	27.4039	0.0183343	0.00234861	2.52289	6.06428e-05	4.21722	0.00260451	2.58427
A0A0H3C425	A0A0H3C425_CAUVN			Thiol-disulfide isomerase and thioredoxin	0.000348797	19	17	18	19	16	15	19							25.2836	25.1395	25.537	24.5126	24.2229	25.3342	25.2836	25.1395	25.537	24.5126	24.2229	25.3342	25.3295	24.7698	0.00794756	0.023349	-0.559687	0.0893349	1.04898	0.191769	0.717221
A0A0H3C426	A0A0H3C426_CAUVN			Endonuclease	0.000348797	28	27	28	24	26	26	27							27.0485	27.116	26.9997	26.6959	26.8932	26.7511	27.0485	27.116	26.9997	26.6959	26.8932	26.7511	27.0555	26.7825	0.002159	0.00380053	-0.273074	0.0105712	1.97588	0.0470332	1.3276
A0A0H3C429	A0A0H3C429_CAUVN			Methyltransferase	0.000348797	10	9	9	9	8	9	8							25.1631	25.0278	25.1218	24.9226	24.8044	24.977	25.1631	25.0278	25.1218	24.9226	24.8044	24.977	25.1053	24.9031	0.00276173	0.00354385	-0.202265	0.0305082	1.51558	0.0948748	1.02285
A0A0H3C432	A0A0H3C432_CAUVN			LytR/AlgR-family transcriptional regulator	0.000348797	4	4	4	3	4	3	3							24.5293	23.6892	21.5181	24.2456	21.4761	21.9092	24.5293	23.6892	21.5181	24.2456	21.4761	21.9092	23.6951	23.0879	0.0668446	0.0660822	-0.607229	0.537229	0.269841	0.650227	0.186935
A0A0H3C436	A0A0H3C436_CAUVN			Uncharacterized protein	0.000348797	46	46	46	45	44	45	45							29.9634	30.0119	29.8094	29.3829	29.5158	29.5358	29.9634	30.0119	29.8094	29.3829	29.5158	29.5358	29.9308	29.4797	0.00353267	0.00281957	-0.451032	0.00175486	2.75576	0.0155924	1.80709
A0A0H3C437	A0A0H3C437_CAUVN			Two-component response regulator chvI	0.000348797	19	18	19	19	18	18	19							27.6402	27.6124	27.7073	27.8074	27.6128	27.6002	27.6402	27.6124	27.7073	27.8074	27.6128	27.6002	27.6538	27.6766	0.00176424	0.00419875	0.0227988	0.798939	0.0974864	0.857405	0.0668141
A0A0H3C442	A0A0H3C442_CAUVN			Uncharacterized protein	0.000348797	10	7	8	7	8	8	10							23.8565	23.8518	23.3403	23.7987	24.015	24.3063	23.8565	23.8518	23.3403	23.7987	24.015	24.3063	23.7023	24.0551	0.0125268	0.0105972	0.352753	0.126632	0.897456	0.241208	0.617608
A0A0H3C444	A0A0H3C444_CAUVN			von Willebrand factor type A domain protein	0.000348797	17	16	16	15	15	15	17							25.4478	25.4369	25.6299	25.5196	25.4504	25.6534	25.4478	25.4369	25.6299	25.5196	25.4504	25.6534	25.5076	25.5436	0.00425034	0.00404156	0.0359841	0.687432	0.16277	0.773567	0.111502
A0A0H3C446	A0A0H3C446_CAUVN			SCO1/SenC family protein	0.000348797	5	5	5	5	4	5	4							25.1067	25.2459	25.0795	25.2531	25.2624	25.268	25.1067	25.2459	25.0795	25.2531	25.2624	25.268	25.1459	25.2612	0.0035499	0.000297292	0.115307	0.10995	0.958805	0.219682	0.658206
A0A0H3C448	A0A0H3C448_CAUVN			Endopygalactorunase	0.000348797	4	4	3	4	4	4	3							22.2483	21.4685	22.1241	22.2418	22.1817	21.6882	22.2483	21.4685	22.1241	22.2418	22.1817	21.6882	21.9853	22.0576	0.0190919	0.0137847	0.0723749	0.741287	0.130014	0.811681	0.0906147
A0A0H3C454	A0A0H3C454_CAUVN			Cyanophycinase	0.000348797	14	4	2	3	3	2	3							21.5395	20.4921	20.6612	20.7025	20.4317	21.115	21.5395	20.4921	20.6612	20.7025	20.4317	21.115	20.9745	20.7774	0.0269075	0.0165821	-0.1971	0.670512	0.173593	0.760081	0.11914
A0A0H3C456	A0A0H3C456_CAUVN			Glutathione S-transferase	0.000348797	4	4	4	4	4	4	4							22.7095	22.8142	23.2084	23.1806	23.0116	23.0027	22.7095	22.8142	23.2084	23.1806	23.0116	23.0027	22.9271	23.0673	0.0114823	0.00434467	0.14022	0.334313	0.475846	0.467791	0.329948
A0A0H3C459	A0A0H3C459_CAUVN			N-succinylglutamate 5-semialdehyde dehydrogenase	0.000348797	27	6	6	7	3	2	4							22.6391	21.8521	22.7695	21.6495	19.481	21.5785	22.6391	21.8521	22.7695	21.6495	19.481	21.5785	22.4732	21.1851	0.0221379	0.0589395	-1.28808	0.0652887	1.18516	0.154696	0.810521
A0A0H3C461	A0A0H3C461_CAUVN			AMP nucleosidase	0.000348797	34	25	28	23	22	23	25							27.1501	27.0583	27.0567	27.1707	27.0959	27.2182	27.1501	27.0583	27.0567	27.1707	27.0959	27.2182	27.089	27.1625	0.0019748	0.00226862	0.0734306	0.262591	0.58072	0.398296	0.399794
A0A0H3C465	A0A0H3C465_CAUVN			DNA recombination protein RmuC homolog	0.000348797	24	24	23	24	22	23	23							26.7806	27.0692	27.0609	27.6518	26.785	27.1022	26.7806	27.0692	27.0609	27.6518	26.785	27.1022	26.9763	27.2249	0.00609143	0.0161351	0.248577	0.411723	0.385395	0.539298	0.268171
A0A0H3C466	A0A0H3C466_CAUVN			Histidine kinase	0.000348797	13	10	12	10	9	10	8							23.4768	23.6002	23.639	23.7477	23.6939	23.4795	23.4768	23.6002	23.639	23.7477	23.6939	23.4795	23.5737	23.645	0.00359368	0.00600063	0.0712978	0.488922	0.310761	0.60984	0.214784
A0A0H3C471	A0A0H3C471_CAUVN			Conserved cell surface protein	0.000348797	15	13	15	14	14	13	13							26.7643	26.7092	26.7329	26.4387	26.366	25.7601	26.7643	26.7092	26.7329	26.4387	26.366	25.7601	26.7357	26.2187	0.00103416	0.0142265	-0.517	0.0312074	1.50574	0.0959214	1.01808
A0A0H3C475	A0A0H3C475_CAUVN			ABC-type sulfate transport system, periplasmic component	0.000348797	24	24	24	23	23	24	24							28.521	28.4606	28.4616	28.7356	28.5359	28.8352	28.521	28.4606	28.4616	28.7356	28.5359	28.8352	28.4813	28.7075	0.00121382	0.00531052	0.226187	0.0502046	1.29926	0.130652	0.883885
A0A0H3C480	A0A0H3C480_CAUVN			Phosphate transport system permease protein PstA	0.000348797	9	5	5	6	7	6	8							23.8116	23.7228	23.9946	23.9096	23.913	24.1365	23.8116	23.7228	23.9946	23.9096	23.913	24.1365	23.8475	23.9903	0.00581211	0.00542062	0.142839	0.219014	0.659529	0.349364	0.456722
A0A0H3C483	A0A0H3C483_CAUVN			Heme:hemopexin-binding protein	0.000348797	7	4	4	6	4	5	4							21.4715	21.7258	22.0223	21.8844	21.6374	21.4508	21.4715	21.7258	22.0223	21.8844	21.6374	21.4508	21.7574	21.6685	0.0126803	0.0100426	-0.0889065	0.663337	0.178266	0.753928	0.12267
A0A0H3C485	A0A0H3C485_CAUVN			Glyoxalase superfamily protein	0.00722022	1	1	1	1	1	1	1							18.1332	18.0437	17.5061	18.6596	18.5114	18.5478	18.1332	18.0437	17.5061	18.6596	18.5114	18.5478	17.9197	18.5743	0.018954	0.00415816	0.654646	0.0104694	1.98008	0.0466491	1.33116
A0A0H3C490	A0A0H3C490_CAUVN			Enoyl-CoA hydratase	0.000348797	24	22	23	23	21	19	20							28.4136	28.4596	28.4295	28.6049	28.3987	28.4108	28.4136	28.4596	28.4295	28.6049	28.3987	28.4108	28.4344	28.4746	0.000821488	0.00406352	0.040227	0.626628	0.20299	0.727255	0.138313
A0A0H3C491	A0A0H3C491_CAUVN			Lysophospholipid acyltransferase	0.000348797	11	11	11	11	10	11	11							24.3569	24.3312	24.2467	24.1958	24.3293	24.3327	24.3569	24.3312	24.2467	24.1958	24.3293	24.3327	24.3124	24.2873	0.00237148	0.00321598	-0.0250578	0.703979	0.15244	0.784478	0.105419
A0A0H3C492	A0A0H3C492_CAUVN			Nitrate response regulator NasT	0.000348797	5	5	5	5	3	4	4							22.8729	22.95	23.4617	22.4157	22.7494	22.1836	22.8729	22.95	23.4617	22.4157	22.7494	22.1836	23.1193	22.4684	0.0138564	0.012669	-0.650955	0.0275599	1.55972	0.0886595	1.05227
A0A0H3C495	A0A0H3C495_CAUVN			Zn-dependent protease family protein	0.000348797	36	34	36	34	33	34	32							27.695	27.6436	27.6452	27.8981	27.7527	27.7856	27.695	27.6436	27.6452	27.8981	27.7527	27.7856	27.6614	27.8135	0.00105643	0.00274222	0.152065	0.0460342	1.33692	0.122853	0.910615
A0A0H3C497	A0A0H3C497_CAUVN			MPT synthase subunit 2	0.000348797	3	3	3	2	2	3	3							21.8363	21.6978	20.293	20.2906	21.7243	21.5239	21.8363	21.6978	20.293	20.2906	21.7243	21.5239	21.4223	21.3031	0.0401331	0.0366579	-0.119113	0.87283	0.0590705	0.912394	0.0398176
A0A0H3C498	A0A0H3C498_CAUVN			Assimilatory nitrate reductase catalytic subunit	0.000348797	5	2	2	5	0	1	1							20.0914	20.3412	22.101	NA	19.035	19.1779	20.0914	20.3412	22.101	19.7255	19.035	19.1779	21.1423	19.3445	0.0525437	0.0188721	-1.79783	0.0405711	1.39178	0.112239	0.949856
A0A0H3C499	A0A0H3C499_CAUVN			Uncharacterized protein	0.000348797	20	18	20	20	17	19	18							25.2682	25.5573	25.6806	25.0196	25.0005	24.9239	25.2682	25.5573	25.6806	25.0196	25.0005	24.9239	25.5122	24.9819	0.00830144	0.0020272	-0.530314	0.0052335	2.28121	0.0296075	1.5286
A0A0H3C4A2	A0A0H3C4A2_CAUVN			Putative aerobic-type carbon monoxide dehydrogenase, large subunit CoxL	0.000348797	35	35	31	32	31	31	33							26.9212	26.8696	26.8657	26.9748	26.9532	26.9696	26.9212	26.8696	26.8657	26.9748	26.9532	26.9696	26.8857	26.9659	0.00115236	0.000417472	0.0802255	0.132586	0.877504	0.248321	0.604987
A0A0H3C4A4	A0A0H3C4A4_CAUVN			ExbD-family protein	0.000348797	12	12	12	12	12	11	12							30.5142	30.531	30.5948	30.6078	30.4366	30.5677	30.5142	30.531	30.5948	30.6078	30.4366	30.5677	30.5471	30.5392	0.00139172	0.00293352	-0.00789669	0.891063	0.0500914	0.924735	0.0339829
A0A0H3C4A5	A0A0H3C4A5_CAUVN			5-methylcytosine-specific restriction enzyme MRR	0.000348797	16	13	15	14	13	14	13							26.87	26.8726	26.8831	26.8265	26.6767	26.7722	26.87	26.8726	26.8831	26.8265	26.6767	26.7722	26.8753	26.7598	0.000256498	0.00283468	-0.115478	0.0902735	1.04444	0.192732	0.715046
A0A0H3C4A7	A0A0H3C4A7_CAUVN			Histidine kinase	0.000348797	19	19	19	18	10	13	13							24.533	24.6265	24.5386	22.6766	23.049	23.045	24.533	24.6265	24.5386	22.6766	23.049	23.045	24.5667	22.9338	0.00213371	0.00932831	-1.63288	1.75498e-05	4.75573	0.00147272	2.83188
A0A0H3C4A9	A0A0H3C4A9_CAUVN			Molybdate-binding protein	0.000348797	8	8	8	8	8	7	8							24.725	24.665	24.0697	24.1305	24.11	24.1948	24.725	24.665	24.0697	24.1305	24.11	24.1948	24.5153	24.1456	0.0147928	0.00183263	-0.369738	0.120402	0.919365	0.233524	0.631669
A0A0H3C4B2	A0A0H3C4B2_CAUVN			Ribonuclease VapC	0.000348797	3	3	3	3	3	3	3							22.177	22.4659	22.1253	22.8612	22.7052	22.5149	22.177	22.4659	22.1253	22.8612	22.7052	22.5149	22.264	22.7007	0.00824685	0.00764349	0.436676	0.0186089	1.73028	0.0689784	1.16129
A0A0H3C4B4	A0A0H3C4B4_CAUVN			Dioxygenase	0.000348797	4	3	4	3	3	3	3							19.9532	20.6588	20.3255	20.0181	19.4006	20.5637	19.9532	20.6588	20.3255	20.0181	19.4006	20.5637	20.341	20.0707	0.017378	0.0291043	-0.270365	0.388113	0.411042	0.521106	0.283074
A0A0H3C4B5	A0A0H3C4B5_CAUVN			Alpha-ketoglutarate dehydrogenase	0.000348797	106	103	99	98	102	101	106							30.8134	30.8109	30.7664	31.4972	31.3999	31.4427	30.8134	30.8109	30.7664	31.4972	31.3999	31.4427	30.7971	31.4471	0.000859127	0.00155084	0.650055	2.81443e-05	4.55061	0.00165641	2.78083
A0A0H3C4C1	A0A0H3C4C1_CAUVN			Glycosyltransferase family 99 protein WbsX	0.000348797	29	28	28	26	25	27	26							26.5933	27.0648	26.8274	28.119	27.7443	28.0964	26.5933	27.0648	26.8274	28.119	27.7443	28.0964	26.8413	27.9965	0.00878677	0.0075068	1.15517	0.000580315	3.23634	0.00882524	2.05427
A0A0H3C4C3	A0A0H3C4C3_CAUVN			Uncharacterized protein	0.000348797	8	8	8	8	8	8	8							25.5167	25.406	25.4252	25.3831	25.3329	25.419	25.5167	25.406	25.4252	25.3831	25.3329	25.419	25.4501	25.3788	0.00232528	0.0017046	-0.0713601	0.255456	0.592683	0.390949	0.40788
A0A0H3C4C4	A0A0H3C4C4_CAUVN			Integral membrane protein	0.000348797	5	5	5	5	5	5	5							24.8913	24.8081	24.9908	25.3738	25.4934	25.5014	24.8913	24.8081	24.9908	25.3738	25.4934	25.5014	24.8987	25.4574	0.00367489	0.0028081	0.558712	0.000367849	3.43433	0.00657556	2.18207
A0A0H3C4C5	A0A0H3C4C5_CAUVN			NAD(FAD)-utilizing dehydrogenase	0.000348797	10	10	9	9	8	10	10							23.8954	23.6911	23.725	23.8861	23.986	24.0394	23.8954	23.6911	23.725	23.8861	23.986	24.0394	23.7733	23.9719	0.00460464	0.00324729	0.198581	0.0483636	1.31548	0.12727	0.895273
A0A0H3C4C7	A0A0H3C4C7_CAUVN			Secretory tripeptidyl aminopeptidase	0.000348797	33	29	31	32	33	31	30							26.8122	26.791	26.7916	26.9894	26.9399	26.8594	26.8122	26.791	26.7916	26.9894	26.9399	26.8594	26.7983	26.9306	0.000450752	0.00243664	0.13227	0.0545853	1.26292	0.137419	0.861955
A0A0H3C4C9	A0A0H3C4C9_CAUVN			Inorganic pyrophosphatase	0.000348797	9	9	9	9	9	9	9							27.5846	27.5134	27.4063	27.5223	27.849	27.8004	27.5846	27.5134	27.4063	27.5223	27.849	27.8004	27.5033	27.7309	0.00326341	0.00635949	0.227591	0.0870869	1.06005	0.188181	0.725424
A0A0H3C4D1	A0A0H3C4D1_CAUVN			Short chain dehydrogenase	0.000348797	7	6	6	6	5	7	5							22.3473	22.715	22.5615	21.9356	23.2137	21.907	22.3473	22.715	22.5615	21.9356	23.2137	21.907	22.5491	22.4899	0.00819194	0.0333882	-0.0591496	0.640546	0.19345	0.73755	0.132208
A0A0H3C4D3	A0A0H3C4D3_CAUVN			Ferric uptake regulation protein	0.00134998	2	1	1	1	1	1	1							20.1894	20.1233	20.127	20.7282	20.9774	20.1107	20.1894	20.1233	20.127	20.7282	20.9774	20.1107	20.1469	20.6493	0.00184305	0.0216545	0.502436	0.0930858	1.03112	0.195861	0.708051
A0A0H3C4D4	A0A0H3C4D4_CAUVN			Magnesium and cobalt efflux protein CorC	0.000348797	15	15	14	14	14	15	14							26.1769	26.1747	26.2343	26.8422	26.7331	26.6214	26.1769	26.1747	26.2343	26.8422	26.7331	26.6214	26.1956	26.7351	0.00128926	0.00413064	0.539486	0.000444605	3.35203	0.00733963	2.13433
A0A0H3C4D5	A0A0H3C4D5_CAUVN			Peptidase family S41 protein	0.000348797	7	7	6	7	4	7	5							22.5068	22.2055	22.4154	21.5837	23.3932	21.582	22.5068	22.2055	22.4154	21.5837	23.3932	21.582	22.3814	22.4592	0.00690477	0.0471111	0.0778826	0.73145	0.135816	0.806169	0.0935739
A0A0H3C4D8	A0A0H3C4D8_CAUVN			Phosphonates-binding protein	0.000348797	28	27	25	26	26	25	26							27.2414	27.1407	27.2594	27.421	27.3127	27.4363	27.2414	27.1407	27.2594	27.421	27.3127	27.4363	27.2148	27.391	0.00235116	0.00246093	0.17628	0.034029	1.46815	0.101147	0.995045
A0A0H3C4D9	A0A0H3C4D9_CAUVN			tRNA threonylcarbamoyl adenosine modification protein, YeaZ family	0.000348797	12	11	11	11	10	12	11							25.5379	25.5083	25.4726	25.4791	25.5338	25.8694	25.5379	25.5083	25.4726	25.4791	25.5338	25.8694	25.5065	25.638	0.00128299	0.008247	0.131475	0.333025	0.477523	0.466637	0.331021
A0A0H3C4E0	A0A0H3C4E0_CAUVN			Ferredoxin	0.000348797	8	8	8	8	8	8	8							27.7298	27.7796	27.8429	28.09	27.8937	27.9178	27.7298	27.7796	27.8429	28.09	27.8937	27.9178	27.7848	27.9698	0.00203974	0.00382749	0.18498	0.0511527	1.29113	0.131854	0.879908
A0A0H3C4E3	A0A0H3C4E3_CAUVN			ATP synthase subunit c	0.0010142	1	1	1	1	1	1	1							20.8782	20.6652	20.8343	20.7726	21.4539	21.3207	20.8782	20.6652	20.8343	20.7726	21.4539	21.3207	20.7955	21.2112	0.00540798	0.0170463	0.415722	0.0934026	1.02964	0.196223	0.707249
A0A0H3C4E4	A0A0H3C4E4_CAUVN			Probable lipid II flippase MurJ	0.000348797	4	3	3	4	4	3	3							23.0378	23.013	24.3381	24.5005	23.1579	23.3045	23.0378	23.013	24.3381	24.5005	23.1579	23.3045	23.6053	23.788	0.0323066	0.0311341	0.182728	0.72919	0.13716	0.804265	0.0946009
A0A0H3C4E5	A0A0H3C4E5_CAUVN			Methylated-DNA--[protein]-cysteine S-methyltransferase	0.000348797	4	4	4	4	4	4	4							22.5339	21.9623	22.2406	22.6475	22.484	22.1398	22.5339	21.9623	22.2406	22.6475	22.484	22.1398	22.2644	22.4389	0.0128484	0.0115565	0.174481	0.401027	0.396826	0.529924	0.275786
A0A0H3C4E8	A0A0H3C4E8_CAUVN			Glycerol-3-phosphate dehydrogenase [NAD(P)+]	0.000348797	22	22	22	22	19	22	22							26.7369	26.6827	26.6472	26.7798	26.7809	26.6969	26.7369	26.6827	26.6472	26.7798	26.7809	26.6969	26.6894	26.7531	0.00169259	0.00180245	0.0636899	0.284428	0.546028	0.419354	0.37742
A0A0H3C4F0	A0A0H3C4F0_CAUVN			Thiol:disulfide interchange protein dsbA	0.000348797	7	6	6	5	7	5	6							25.4867	25.5021	25.4545	25.2581	23.7835	25.3075	25.4867	25.5021	25.4545	25.2581	23.7835	25.3075	25.4813	24.933	0.000953036	0.0349424	-0.548294	0.161416	0.792052	0.283676	0.547178
A0A0H3C4F3	A0A0H3C4F3_CAUVN			3-hydroxyacyl-CoA dehydrogenase	0.000348797	76	75	76	72	69	73	75							30.0273	30.0738	30.0116	30.1599	30.2012	30.258	30.0273	30.0738	30.0116	30.1599	30.2012	30.258	30.0378	30.207	0.00107704	0.001631	0.169173	0.019455	1.71097	0.0708971	1.14937
A0A0H3C4F4	A0A0H3C4F4_CAUVN			Alpha/beta hydrolase family protein	0.000348797	8	8	8	8	4	6	3							23.6838	23.5364	23.713	23.2653	21.043	20.4062	23.6838	23.5364	23.713	23.2653	21.043	20.4062	23.6464	22.1156	0.00400442	0.0695839	-1.53085	0.0355088	1.44966	0.103465	0.985208
A0A0H3C4F7	A0A0H3C4F7_CAUVN			MerR-family transcriptional regulator	0.000348797	7	7	7	6	6	6	6							24.0966	24.1181	23.6904	23.6367	23.4948	23.6532	24.0966	24.1181	23.6904	23.6367	23.4948	23.6532	23.9813	23.5966	0.0100521	0.00369112	-0.384691	0.0349468	1.45659	0.102673	0.988544
A0A0H3C4F9	A0A0H3C4F9_CAUVN			Abortive infection protein	0.00235452	1	1	1	1	1	1	1							20.2005	20.2272	20.1133	19.8733	20.5198	20.7752	20.2005	20.2272	20.1133	19.8733	20.5198	20.7752	20.1811	20.4369	0.0029528	0.0227976	0.255792	0.412655	0.384413	0.539365	0.268117
A0A0H3C4G2	A0A0H3C4G2_CAUVN			Dienelactone hydrolase-related protein	0.000348797	10	10	10	9	8	10	9							24.0159	24.0372	24.084	24.2311	24.3639	24.2948	24.0159	24.0372	24.084	24.2311	24.3639	24.2948	24.046	24.2976	0.00144945	0.00273422	0.25167	0.00548916	2.26049	0.030652	1.51354
A0A0H3C4G3	A0A0H3C4G3_CAUVN			Methylated-DNA--protein-cysteine methyltransferase	0.00332889	1	1	1	1	1	1	1							17.4225	18.1879	17.5659	18.0369	17.5103	17.3577	17.4225	18.1879	17.5659	18.0369	17.5103	17.3577	17.7652	17.6653	0.0229553	0.0202075	-0.0999038	0.751151	0.124273	0.818034	0.0872286
A0A0H3C4G4	A0A0H3C4G4_CAUVN			ADP-heptose--LPS heptosyltransferase	0.000348797	12	11	10	11	11	10	11							24.6984	24.4616	24.7206	24.8199	24.878	24.9786	24.6984	24.4616	24.7206	24.8199	24.878	24.9786	24.6315	24.8937	0.00582895	0.00322676	0.26214	0.0310128	1.50846	0.0956256	1.01943
A0A0H3C4G6	A0A0H3C4G6_CAUVN			UDP-glucose 4-epimerase	0.000348797	6	6	6	6	5	6	6							23.4701	23.4288	23.2693	23.2728	23.7079	23.5582	23.4701	23.4288	23.2693	23.2728	23.7079	23.5582	23.392	23.5241	0.0045333	0.00939983	0.132112	0.377156	0.423479	0.509565	0.2928
A0A0H3C4G8	A0A0H3C4G8_CAUVN			GumN superfamily protein	0.000348797	20	20	20	19	17	20	18							26.8761	26.8028	26.5404	26.592	26.7456	26.7687	26.8761	26.8028	26.5404	26.592	26.7456	26.7687	26.7468	26.7042	0.0065999	0.00359534	-0.0426306	0.74056	0.13044	0.811179	0.0908835
A0A0H3C4G9	A0A0H3C4G9_CAUVN			Feruloyl-CoA synthetase	0.000348797	23	22	23	23	22	22	22							25.8835	25.8481	25.9085	25.8815	25.8218	25.7201	25.8835	25.8481	25.9085	25.8815	25.8218	25.7201	25.8802	25.8093	0.00117169	0.00316215	-0.0708762	0.282186	0.549464	0.416863	0.380007
A0A0H3C4H1	A0A0H3C4H1_CAUVN			Quinone oxidoreductase	0.000348797	16	15	16	16	16	16	15							25.9695	25.9679	26.0178	25.6423	25.7908	25.56	25.9695	25.9679	26.0178	25.6423	25.7908	25.56	25.9852	25.6675	0.00109209	0.00455783	-0.3177	0.00585739	2.2323	0.0322905	1.49093
A0A0H3C4H2	A0A0H3C4H2_CAUVN			Isoleucine--tRNA ligase	0.000348797	64	64	64	63	63	64	63							28.9208	28.9174	28.901	29.1615	29.0545	29.0277	28.9208	28.9174	28.901	29.1615	29.0545	29.0277	28.9131	29.0824	0.000366002	0.00243434	0.169284	0.0257945	1.58847	0.0854458	1.06831
A0A0H3C4H5	A0A0H3C4H5_CAUVN			Ribulose-phosphate 3-epimerase	0.000348797	7	7	7	7	7	6	6							26.9125	26.8914	26.6903	27.1043	26.9381	27.0505	26.9125	26.8914	26.6903	27.1043	26.9381	27.0505	26.8348	27.0326	0.00457067	0.00313754	0.197798	0.0619165	1.20819	0.150604	0.822164
A0A0H3C4H8	A0A0H3C4H8_CAUVN			NnrU family membrane protein	0.000348797	3	3	3	3	3	3	3							22.2522	22.3938	22.9235	22.213	22.3097	22.3671	22.2522	22.3938	22.9235	22.213	22.3097	22.3671	22.5531	22.298	0.0157125	0.00349174	-0.255041	0.269561	0.569343	0.405315	0.392208
A0A0H3C4H9	A0A0H3C4H9_CAUVN	A0A0H3C8B8; A0A0H3C4H9	CCNA_00106;lolD	2-polyprenyl-6-methoxyphenol hydroxylase	0.000348797	27	27	26	25	25	25	27	1	1	1	1	1	1	27.0315	27.0028	27.141	27.1459	27.1871	27.1368	27.0315	27.0028	27.141	27.1459	27.1871	27.1368	27.0597	27.1568	0.00269642	0.000987289	0.0970971	0.142595	0.845897	0.260446	0.584282
A0A0H3C4I2	A0A0H3C4I2_CAUVN			Short chain dehydrogenase	0.000348797	18	18	18	18	17	18	18							26.8006	26.792	26.6977	26.6909	26.6994	26.7017	26.8006	26.792	26.6977	26.6909	26.6994	26.7017	26.7642	26.6973	0.00213379	0.000213292	-0.0668588	0.247836	0.605836	0.382386	0.417498
A0A0H3C4I3	A0A0H3C4I3_CAUVN			Ferrous iron transport protein A	0.000348797	6	6	6	6	6	6	6							24.7263	24.6215	24.6031	24.5098	24.4968	25.156	24.7263	24.6215	24.6031	24.5098	24.4968	25.156	24.6513	24.7551	0.00269508	0.0152469	0.103795	0.729968	0.136696	0.80483	0.0942959
A0A0H3C4I4	A0A0H3C4I4_CAUVN			Glyoxalase family protein	0.000348797	2	2	2	2	2	2	2							21.3196	20.8795	20.7887	20.4632	21.047	21.1055	21.3196	20.8795	20.7887	20.4632	21.047	21.1055	21.0151	20.8996	0.0135243	0.0170164	-0.115552	0.609577	0.214971	0.713496	0.146608
A0A0H3C4I7	A0A0H3C4I7_CAUVN			Lysine 2,3-aminomutase	0.000348797	7	7	6	6	6	7	7							23.277	23.0313	22.9316	23.2152	22.9569	23.5463	23.277	23.0313	22.9316	23.2152	22.9569	23.5463	23.0874	23.2597	0.00770281	0.0127117	0.172365	0.402797	0.394914	0.531143	0.274788
A0A0H3C4I8	A0A0H3C4I8_CAUVN			Acetyltransferase	0.000348797	9	9	9	9	9	9	9							24.3811	24.144	24.3895	24.2913	24.4554	24.3955	24.3811	24.144	24.3895	24.2913	24.4554	24.3955	24.3093	24.3823	0.00573341	0.00340712	0.0730451	0.438795	0.357738	0.561933	0.250316
A0A0H3C4I9	A0A0H3C4I9_CAUVN			Porphyrin biosynthesis protein	0.000348797	15	14	14	15	11	13	14							24.0402	23.9314	24.1149	24.3094	23.9578	24.117	24.0402	23.9314	24.1149	24.3094	23.9578	24.117	24.0308	24.1352	0.00384016	0.00729652	0.104447	0.393694	0.404841	0.524369	0.280363
A0A0H3C4J0	A0A0H3C4J0_CAUVN			3-hydroxyacyl CoA dehydrogenase	0.000348797	21	21	20	20	21	19	21							27.7728	27.7585	27.7106	27.5484	27.4581	27.4702	27.7728	27.7585	27.7106	27.5484	27.4581	27.4702	27.7476	27.4928	0.00117435	0.00178333	-0.254747	0.00338512	2.47043	0.0227254	1.64349
A0A0H3C4J4	A0A0H3C4J4_CAUVN			Uncharacterized protein	0.000348797	14	14	14	14	14	13	13							24.838	24.9154	25.3153	25.0904	25.0655	25.2579	24.838	24.9154	25.3153	25.0904	25.0655	25.2579	25.0385	25.1405	0.0102378	0.00416209	0.10197	0.456211	0.340835	0.577383	0.238536
A0A0H3C4J6	A0A0H3C4J6_CAUVN			Uncharacterized protein	0.000348797	3	3	3	3	3	3	3							22.9411	23.0082	22.9756	23.0528	23.4311	23.3868	22.9411	23.0082	22.9756	23.0528	23.4311	23.3868	22.9752	23.2998	0.0014613	0.00888058	0.32458	0.0340876	1.4674	0.101158	0.995001
A0A0H3C4J9	A0A0H3C4J9_CAUVN			AmpG protein	0.000348797	10	7	6	8	6	7	5							24.8016	24.9281	25.0072	25.2156	25.2302	24.9607	24.8016	24.9281	25.0072	25.2156	25.2302	24.9607	24.9148	25.1407	0.00416403	0.00602894	0.225923	0.0723387	1.14063	0.165057	0.782366
A0A0H3C4K0	A0A0H3C4K0_CAUVN			Electron transfer flavoprotein beta subunit	0.000348797	32	31	31	32	31	30	31							29.8801	29.9238	30.0191	29.951	29.8842	29.8756	29.8801	29.9238	30.0191	29.951	29.8842	29.8756	29.9422	29.904	0.00237492	0.00138045	-0.0381604	0.550859	0.258959	0.662667	0.178705
A0A0H3C4K3	A0A0H3C4K3_CAUVN			Tetratricopeptide repeat family protein	0.000348797	16	15	15	13	15	14	15							24.9475	24.7823	24.6517	24.897	25.03	24.9978	24.9475	24.7823	24.6517	24.897	25.03	24.9978	24.7989	24.976	0.00597859	0.0027785	0.177113	0.099954	1.0002	0.205017	0.68821
A0A0H3C4K4	A0A0H3C4K4_CAUVN			TetR family transcriptional regulator	0.000348797	2	2	2	2	2	2	2							24.2109	24.189	23.9245	24.5366	24.5494	24.7185	24.2109	24.189	23.9245	24.5366	24.5494	24.7185	24.1139	24.6039	0.00661294	0.00412757	0.490066	0.00389647	2.40933	0.0248338	1.60496
A0A0H3C4K9	A0A0H3C4K9_CAUVN			Aspartate aminotransferase	0.000348797	9	9	9	9	8	8	8							24.0898	24.0629	24.1641	24.0025	24.0996	23.5917	24.0898	24.0629	24.1641	24.0025	24.0996	23.5917	24.1063	23.9142	0.00217358	0.0112808	-0.192084	0.199977	0.699019	0.32869	0.483214
A0A0H3C4L0	A0A0H3C4L0_CAUVN			ArsR-family transcriptional regulator	0.0010142	2	2	2	2	2	1	2							18.9096	19.5222	18.3807	18.1711	16.9204	19.0075	18.9096	19.5222	18.3807	18.1711	16.9204	19.0075	19.0126	18.2668	0.0301646	0.0582472	-0.74578	0.183258	0.736936	0.309633	0.509153
A0A0H3C4L3	A0A0H3C4L3_CAUVN			N-formylglutamate deformylase	0.000348797	12	9	10	11	12	11	10							25.0534	25.0493	25.2566	25.3069	25.1716	24.7103	25.0534	25.0493	25.2566	25.3069	25.1716	24.7103	25.1231	25.0847	0.00471879	0.0124807	-0.0383977	0.751765	0.123918	0.818113	0.0871869
A0A0H3C4L4	A0A0H3C4L4_CAUVN			Exopolysaccharide transport family protein	0.000348797	67	66	65	65	59	67	66							29.9736	30.0587	30.136	30.1079	30.0113	30.1938	29.9736	30.0587	30.136	30.1079	30.0113	30.1938	30.0576	30.1063	0.00270257	0.0030337	0.0486739	0.540309	0.267358	0.652648	0.185321
A0A0H3C4L6	A0A0H3C4L6_CAUVN			tRNA 5-methylaminomethyl-2-thiouridine biosynthesis bifunctional protein MnmC	0.000348797	18	18	18	17	17	18	18							24.4417	24.5211	24.2835	24.4495	24.4777	24.5129	24.4417	24.5211	24.2835	24.4495	24.4777	24.5129	24.4188	24.4803	0.0049544	0.00129651	0.0614537	0.425982	0.370608	0.550425	0.259302
A0A0H3C4L8	A0A0H3C4L8_CAUVN			Polysaccharide export protein	0.000348797	8	8	8	8	8	7	7							25.8017	25.6936	25.51	25.2888	25.2262	25.3806	25.8017	25.6936	25.51	25.2888	25.2262	25.3806	25.6734	25.2999	0.00574607	0.00306988	-0.373463	0.00882402	2.05433	0.0421127	1.37559
A0A0H3C4M0	A0A0H3C4M0_CAUVN			Glycosyltransferase	0.00978474	1	1	1	1	1	1	1							21.0114	20.2297	20.2342	21.3848	23.0561	20.6529	21.0114	20.2297	20.2342	21.3848	23.0561	20.6529	20.5409	22.059	0.0219605	0.0567718	1.51812	0.118163	0.927517	0.230691	0.63697
A0A0H3C4M2	A0A0H3C4M2_CAUVN			Type II secretion system protein E	0.000348797	7	3	4	4	3	4	4							20.7343	23.1314	22.738	21.2519	21.2939	20.9037	20.7343	23.1314	22.738	21.2519	21.2939	20.9037	22.5108	21.1601	0.057904	0.0101259	-1.35067	0.160065	0.795702	0.281646	0.550297
A0A0H3C4M3	A0A0H3C4M3_CAUVN			7,8-dihydroneopterin aldolase	0.000348797	12	10	11	10	10	12	11							24.5822	24.6818	24.6342	24.9178	24.799	24.9079	24.5822	24.6818	24.6342	24.9178	24.799	24.9079	24.6333	24.8759	0.00202146	0.00264897	0.242613	0.00775509	2.11041	0.0388566	1.41054
A0A0H3C4M4	A0A0H3C4M4_CAUVN			ABC transporter, ATP-binding protein cydC	0.000348797	7	7	7	6	6	6	6							22.6997	22.9403	22.1162	21.8096	21.566	22.3343	22.6997	22.9403	22.1162	21.8096	21.566	22.3343	22.6251	21.9398	0.0187644	0.0179255	-0.685287	0.0606807	1.21695	0.148194	0.829169
A0A0H3C4M6	A0A0H3C4M6_CAUVN			Very-short-patch-repair endonuclease	0.000348797	5	5	5	5	5	5	5							23.82	23.7816	23.6017	23.5931	23.8464	23.5876	23.82	23.7816	23.6017	23.5931	23.8464	23.5876	23.7375	23.6809	0.00491076	0.00624529	-0.0566843	0.589198	0.229739	0.695608	0.157636
A0A0H3C4M8	A0A0H3C4M8_CAUVN			Chemotaxis protein cheW	0.000348797	16	15	15	13	14	14	14							27.0245	26.9902	26.8608	26.7937	26.8159	26.9292	27.0245	26.9902	26.8608	26.7937	26.8159	26.9292	26.9602	26.8475	0.00320119	0.00270744	-0.112721	0.165792	0.780435	0.28949	0.538366
A0A0H3C4N4	A0A0H3C4N4_CAUVN			ABC transporter ATP-binding protein	0.000348797	19	18	18	19	19	19	19							26.6356	26.5875	26.5894	26.9824	26.964	26.9615	26.6356	26.5875	26.5894	26.9824	26.964	26.9615	26.6043	26.9693	0.00102305	0.000422758	0.364991	0.000303743	3.51749	0.00625003	2.20412
A0A0H3C4N5	A0A0H3C4N5_CAUVN			L-sorbosone dehydrogenase	0.000348797	14	14	14	14	12	12	11							25.7548	25.9194	25.7907	25.5974	25.4855	25.5796	25.7548	25.9194	25.7907	25.5974	25.4855	25.5796	25.8234	25.555	0.00335063	0.00235281	-0.268405	0.00890525	2.05035	0.042174	1.37496
A0A0H3C4N6	A0A0H3C4N6_CAUVN	A0A0H3CAI5; A0A0H3C4N6	CCNA_00436;CCNA_01875	Acyl-CoA dehydrogenase, short-chain specific	0.000348797	11	11	11	9	8	9	9	3	3	3	3	3	3	25.0394	25.084	24.6156	24.0563	24.1466	24.4006	25.0394	25.084	24.6156	24.0563	24.1466	24.4006	24.9279	24.2086	0.0103772	0.00737602	-0.719224	0.00567043	2.24638	0.0314897	1.50183
A0A0H3C4N8	A0A0H3C4N8_CAUVN			3-isopropylmalate dehydrogenase	0.000348797	27	27	27	26	27	27	27							28.7831	28.736	28.7243	29.0336	28.9682	29.0409	28.7831	28.736	28.7243	29.0336	28.9682	29.0409	28.748	29.0146	0.00108374	0.00137924	0.266585	0.00226361	2.6452	0.0179445	1.74607
A0A0H3C4N9	A0A0H3C4N9_CAUVN			Chemotaxis receiver domain protein cheYI	0.000348797	10	9	9	9	8	8	8							27.4805	27.4461	27.3301	27.3605	27.2997	27.319	27.4805	27.4461	27.3301	27.3605	27.2997	27.319	27.4203	27.3266	0.00287397	0.00113678	-0.0936765	0.177213	0.751505	0.303577	0.517731
A0A0H3C4P2	A0A0H3C4P2_CAUVN			2OG-Fe(II) oxygenase superfamily protein	0.000348797	25	21	22	23	21	23	21							27.7062	27.6767	27.6661	27.8707	27.6917	27.5863	27.7062	27.6767	27.6661	27.8707	27.6917	27.5863	27.6831	27.721	0.000750524	0.00518688	0.0379021	0.706134	0.151113	0.786382	0.104366
A0A0H3C4P3	A0A0H3C4P3_CAUVN			Chemotaxis receiver domain protein cheYII	0.000348797	13	12	11	11	11	11	11							27.3771	27.2796	27.4312	27.2027	27.4595	27.3675	27.3771	27.2796	27.4312	27.2027	27.4595	27.3675	27.364	27.3471	0.00280889	0.00475801	-0.0169044	0.829586	0.0811386	0.878744	0.0561374
A0A0H3C4P5	A0A0H3C4P5_CAUVN			Tryptophan halogenase	0.000348797	4	4	3	3	3	3	3							21.4299	21.1064	21.5188	20.9937	20.6058	21.2508	21.4299	21.1064	21.5188	20.9937	20.6058	21.2508	21.3623	20.974	0.0101657	0.0154985	-0.388264	0.0936801	1.02835	0.196372	0.706921
A0A0H3C4P7	A0A0H3C4P7_CAUVN			NAD(P)H-quinone reductase	0.000348797	6	6	5	5	5	6	6							23.5605	23.4329	23.4124	23.5746	23.4125	23.6573	23.5605	23.4329	23.4124	23.5746	23.4125	23.6573	23.4701	23.5517	0.00341857	0.0052875	0.0815606	0.387783	0.411411	0.520895	0.28325
A0A0H3C4P8	A0A0H3C4P8_CAUVN			N-acetylglucosamine-6-phosphate deacetylase	0.000348797	31	14	12	9	31	31	31							23.9143	23.8423	23.4551	29.2566	29.2087	29.166	23.9143	23.8423	23.4551	29.2566	29.2087	29.166	23.7509	29.2109	0.010404	0.00155274	5.46005	4.994e-08	7.30155	2.24487e-05	4.64881
A0A0H3C4Q0	A0A0H3C4Q0_CAUVN			Flagellin	0.000348797	2	2	2	2	2	2	2							22.1872	22.2751	22.47	21.406	21.0773	21.1106	22.1872	22.2751	22.47	21.406	21.0773	21.1106	22.3157	21.2057	0.00648794	0.00853735	-1.10999	0.000170904	3.76725	0.00459206	2.33799
A0A0H3C4Q2	A0A0H3C4Q2_CAUVN			TonB-dependent receptor	0.000348797	87	78	83	78	76	74	72							31.2382	31.2489	31.2317	30.7233	30.5973	30.7074	31.2382	31.2489	31.2317	30.7233	30.5973	30.7074	31.2396	30.6771	0.000279162	0.00223601	-0.562502	8.83565e-05	4.05376	0.00317768	2.49789
A0A0H3C4Q4;A0A0H3C647	A0A0H3C4Q4_CAUVN; A0A0H3C647_CAUVN	A0A0H3C4Q4; A0A0H3C647	CCNA_00457;CCNA_00571	Phosphoenolpyruvate--protein phosphotransferase	0.000348797	65	33	32	29	65	62	64	33	32	29	65	62	64	25.3733	25.2396	24.8346	30.739	30.5845	30.7256	25.3733	25.2396	24.8346	30.739	30.5845	30.7256	25.1668	30.6847	0.0111535	0.00278964	5.51786	1.01154e-07	6.99502	3.05587e-05	4.51487
A0A0H3C4Q6	A0A0H3C4Q6_CAUVN			Sialic acid-specific 9-O-acetylesterase	0.000348797	20	20	19	20	17	18	18							26.2672	26.2568	26.2681	25.8032	25.8755	25.8809	26.2672	26.2568	26.2681	25.8032	25.8755	25.8809	26.264	25.8536	0.000239833	0.00167726	-0.410389	0.000226086	3.64573	0.00537799	2.26938
A0A0H3C4Q7	A0A0H3C4Q7_CAUVN			SapC surface layer protein	0.000348797	22	22	21	22	21	21	22							29.983	29.9818	29.9933	30.1762	29.9913	30.1358	29.983	29.9818	29.9933	30.1762	29.9913	30.1358	29.9861	30.1033	0.000211594	0.00322856	0.117206	0.128549	0.890932	0.243471	0.613553
A0A0H3C4Q9	A0A0H3C4Q9_CAUVN			UDP-galactopyranose mutase	0.000348797	28	27	25	26	25	27	27							27.7633	27.8012	27.7582	28.2325	28.1284	28.297	27.7633	27.8012	27.7582	28.2325	28.1284	28.297	27.7744	28.221	0.000846548	0.00301446	0.446609	0.000521246	3.28296	0.00828781	2.08156
A0A0H3C4R1	A0A0H3C4R1_CAUVN			Antitoxin protein relB-1	0.00463423	1	1	1	1	0	1	1							19.7791	20.3381	19.9145	NA	20.2579	20.5521	19.7791	20.3381	19.9145	19.0287	20.2579	20.5521	20.0307	20.0804	0.0145744	0.0405126	0.049681	0.885749	0.0526893	0.921501	0.035504
A0A0H3C4R2	A0A0H3C4R2_CAUVN			Uncharacterized protein	0.000348797	6	5	6	6	5	6	5							26.0919	26.2264	26.1231	26.1062	26.2848	26.2321	26.0919	26.2264	26.1231	26.1062	26.2848	26.2321	26.1483	26.2096	0.00269202	0.00350211	0.0613331	0.431389	0.365131	0.555984	0.254938
A0A0H3C4R5	A0A0H3C4R5_CAUVN			Efflux pump membrane transporter	0.000348797	36	23	19	19	21	27	31							25.5432	25.3522	25.3836	26.4743	26.7298	27.0988	25.5432	25.3522	25.3836	26.4743	26.7298	27.0988	25.4288	26.7906	0.00402878	0.0117296	1.36185	0.000342334	3.46555	0.00634474	2.19759
A0A0H3C4R6	A0A0H3C4R6_CAUVN			O-antigen polymerase	0.000348797	5	4	4	4	4	4	4							23.9927	23.8927	24.2939	24.1778	24.2113	24.2822	23.9927	23.8927	24.2939	24.1778	24.2113	24.2822	24.07	24.2244	0.00868052	0.00220093	0.154378	0.208081	0.681768	0.337601	0.471597
A0A0H3C4R7	A0A0H3C4R7_CAUVN			Putative membrane spanning protein	0.000348797	3	2	3	3	3	3	3							20.0537	21.4124	21.7855	21.8568	21.4179	21.3599	20.0537	21.4124	21.7855	21.8568	21.4179	21.3599	21.2524	21.5624	0.0432292	0.0126093	0.310047	0.370777	0.430887	0.503877	0.297675
A0A0H3C4S3	A0A0H3C4S3_CAUVN			UDP-N-acetylglucosamine 4,6-dehydratase	0.000348797	32	30	28	28	30	26	29							27.4377	27.4356	27.4641	27.7397	27.6348	27.6276	27.4377	27.4356	27.4641	27.7397	27.6348	27.6276	27.4458	27.6683	0.000580485	0.00226834	0.22247	0.00731164	2.13599	0.0374381	1.42669
A0A0H3C4S8	A0A0H3C4S8_CAUVN			Histidine kinase	0.000348797	33	33	32	31	31	33	31							26.8037	26.7264	26.7528	27.0032	26.9374	26.9383	26.8037	26.7264	26.7528	27.0032	26.9374	26.9383	26.7613	26.96	0.00146811	0.00140124	0.198643	0.00917908	2.0372	0.0428923	1.36762
A0A0H3C4T0	A0A0H3C4T0_CAUVN			Pseudouridine synthase	0.000348797	9	8	8	8	7	8	9							24.3929	24.3021	24.2593	24.4863	24.469	24.3831	24.3929	24.3021	24.2593	24.4863	24.469	24.3831	24.3192	24.4468	0.00280422	0.00226015	0.127646	0.0844152	1.07358	0.184129	0.734878
A0A0H3C4T2	A0A0H3C4T2_CAUVN			Fumarylacetoacetate hydrolase family protein	0.000348797	5	4	4	4	1	2	3							21.5255	21.3972	21.2122	19.513	19.2726	20.3554	21.5255	21.3972	21.2122	19.513	19.2726	20.3554	21.384	19.7918	0.00736781	0.0288444	-1.59219	0.00184477	2.73406	0.0159686	1.79673
A0A0H3C4T3	A0A0H3C4T3_CAUVN			HAD superfamily phophatase	0.000348797	4	4	4	4	3	4	3							22.1138	22.1068	22.1169	22.1778	21.8972	21.7934	22.1138	22.1068	22.1169	22.1778	21.8972	21.7934	22.1125	21.9654	0.00023427	0.00905716	-0.14711	0.199917	0.699151	0.32869	0.483214
A0A0H3C4T6	A0A0H3C4T6_CAUVN			GTP cyclohydrolase 1	0.000348797	20	19	20	18	20	20	20							26.4571	26.6162	26.2932	26.9518	27.5557	27.1675	26.4571	26.6162	26.2932	26.9518	27.5557	27.1675	26.4615	27.247	0.00610543	0.0112417	0.785435	0.00599488	2.22222	0.0327496	1.48479
A0A0H3C4T7	A0A0H3C4T7_CAUVN			Glutaredoxin	0.000348797	9	9	9	9	9	9	8							26.5276	26.462	26.418	26.7219	26.6205	26.7193	26.5276	26.462	26.418	26.7219	26.6205	26.7193	26.4699	26.688	0.00208332	0.00216587	0.218083	0.0112911	1.94726	0.048939	1.31035
A0A0H3C4T8	A0A0H3C4T8_CAUVN			Poly(3-hydroxyalkanoate) depolymerase	0.000348797	9	9	9	9	7	9	9							25.8381	25.9172	25.84	25.5026	25.8524	25.6593	25.8381	25.9172	25.84	25.5026	25.8524	25.6593	25.8656	25.6785	0.00174511	0.00682523	-0.187063	0.103417	0.98541	0.209961	0.677862
A0A0H3C4U1	A0A0H3C4U1_CAUVN			Uncharacterized protein	0.000348797	4	4	4	3	3	3	4							22.8915	22.9078	23.1519	22.9505	22.7807	22.884	22.8915	22.9078	23.1519	22.9505	22.7807	22.884	22.9888	22.8734	0.0063466	0.00374202	-0.115366	0.282065	0.549651	0.416863	0.380007
A0A0H3C4U2	A0A0H3C4U2_CAUVN			Uncharacterized protein	0.000348797	9	9	9	9	8	8	8							25.8142	25.6439	25.8167	25.9657	25.9619	26.0291	25.8142	25.6439	25.8167	25.9657	25.9619	26.0291	25.7605	25.9859	0.00384401	0.00145373	0.225411	0.017506	1.75681	0.0663558	1.17812
A0A0H3C4U3	A0A0H3C4U3_CAUVN			Beta-lactamase class C family protein	0.000348797	10	10	9	8	9	9	9							26.4487	26.4505	26.4602	26.8297	26.5227	26.6527	26.4487	26.4505	26.4602	26.8297	26.5227	26.6527	26.4531	26.6739	0.000233492	0.00577888	0.220717	0.0530217	1.27555	0.134831	0.870212
A0A0H3C4U6	A0A0H3C4U6_CAUVN			tRNA (cytidine(34)-2'-O)-methyltransferase	0.000348797	14	14	14	14	14	13	14							25.6965	25.6712	25.6356	25.7527	25.6263	25.5948	25.6965	25.6712	25.6356	25.7527	25.6263	25.5948	25.668	25.6596	0.00119136	0.00325741	-0.00842038	0.878126	0.056443	0.915081	0.0385405
A0A0H3C4U7	A0A0H3C4U7_CAUVN			17 kDa surface antigen	0.000348797	4	4	2	3	4	3	3							23.2556	21.0957	23.0922	23.3633	21.2681	21.0495	23.2556	21.0957	23.0922	23.3633	21.2681	21.0495	22.7524	22.2996	0.0534938	0.058349	-0.452866	0.526884	0.278285	0.642339	0.192236
A0A0H3C4U9	A0A0H3C4U9_CAUVN			Ribonucleoside-diphosphate reductase subunit beta	0.000348797	12	10	9	8	8	10	10							25.079	24.9273	24.899	25.2735	25.291	25.6001	25.079	24.9273	24.899	25.2735	25.291	25.6001	24.9706	25.3962	0.00387624	0.00723707	0.425509	0.0110896	1.95508	0.04828	1.31623
A0A0H3C4V1	A0A0H3C4V1_CAUVN			Phosphoglycerate mutase family	0.000348797	8	8	7	8	6	7	8							24.6955	24.6888	24.6149	24.7875	24.5419	24.732	24.6955	24.6888	24.6149	24.7875	24.5419	24.732	24.6669	24.6909	0.0018126	0.005216	0.0240491	0.804387	0.0945348	0.860806	0.0650949
A0A0H3C4V2	A0A0H3C4V2_CAUVN			MCP-signal associated domain protein	0.000348797	10	3	4	3	2	0	2							20.7112	20.5148	20.0966	20.1234	NA	19.7682	20.7112	20.5148	20.0966	20.1234	18.7977	19.7682	20.463	19.6633	0.0153573	0.0350782	-0.799764	0.0626301	1.20322	0.151486	0.819629
A0A0H3C4V6	A0A0H3C4V6_CAUVN			5-methyltetrahydropteroyltriglutamate--homocysteine methyltransferase	0.000348797	74	73	73	73	73	74	73							32.6645	32.5294	32.6176	32.6515	32.8197	32.89	32.6645	32.5294	32.6176	32.6515	32.8197	32.89	32.6049	32.7905	0.00210434	0.00373755	0.185611	0.0700008	1.1549	0.161473	0.791901
A0A0H3C4V7	A0A0H3C4V7_CAUVN			Helix-turn-helix DNA-binding protein RodZ	0.000348797	19	19	19	19	19	19	19							26.2901	26.3899	26.3711	26.9199	26.74	26.8191	26.2901	26.3899	26.3711	26.9199	26.74	26.8191	26.351	26.8282	0.00201207	0.00336138	0.47718	0.000597922	3.22336	0.00898668	2.0464
A0A0H3C4W1	A0A0H3C4W1_CAUVN			Purine nucleoside phosphorylase	0.000348797	17	15	16	16	15	17	15							25.6447	25.6709	25.5654	26.0661	26.079	25.8682	25.6447	25.6709	25.5654	26.0661	26.079	25.8682	25.6277	26.0076	0.00214395	0.00454428	0.379895	0.00359795	2.44394	0.0237323	1.62466
A0A0H3C4W2	A0A0H3C4W2_CAUVN			RNA pseudouridylate synthase	0.000348797	23	22	22	21	21	20	21							27.0661	27.0286	27.0026	27.1573	26.9752	27.1059	27.0661	27.0286	27.0026	27.1573	26.9752	27.1059	27.0327	27.0815	0.00118166	0.0034682	0.0488037	0.498841	0.302038	0.618129	0.208921
A0A0H3C4W5	A0A0H3C4W5_CAUVN			HTH tetR-type domain-containing protein	0.000348797	5	4	5	4	5	5	5							22.6209	22.8567	22.4253	22.9547	22.9204	22.8857	22.6209	22.8567	22.4253	22.9547	22.9204	22.8857	22.6451	22.9205	0.00954426	0.00150607	0.275437	0.0533586	1.2728	0.135345	0.868556
A0A0H3C4W6	A0A0H3C4W6_CAUVN			Inositol transport ATP-binding protein IatA	0.000348797	21	3	5	5	2	3	2							21.534	23.288	26.1401	21.2986	25.919	20.8557	21.534	23.288	26.1401	21.2986	25.919	20.8557	24.7934	24.4324	0.0982828	0.123582	-0.360997	0.614492	0.211484	0.717858	0.143961
A0A0H3C4W8	A0A0H3C4W8_CAUVN			DNA-directed RNA polymerase subunit beta'	0.000348797	216	206	203	208	199	203	209							32.3727	32.3636	32.422	32.655	32.5689	32.6988	32.3727	32.3636	32.422	32.655	32.5689	32.6988	32.3863	32.6419	0.000970265	0.00202386	0.255625	0.00488522	2.31112	0.0283268	1.5478
A0A0H3C4X0	A0A0H3C4X0_CAUVN			3-oxoacyl-(Acyl-carrier-protein) synthase III	0.000348797	4	4	4	4	4	3	3							22.7979	22.5199	22.5379	22.5438	22.1708	22.2515	22.7979	22.5199	22.5379	22.5438	22.1708	22.2515	22.6243	22.3311	0.00687829	0.00879309	-0.293154	0.0688083	1.16236	0.159777	0.796486
A0A0H3C4X3	A0A0H3C4X3_CAUVN			Methyl-accepting chemotaxis protein	0.000348797	20	19	20	18	18	19	20							26.8543	26.8393	26.8254	26.6222	26.7368	26.7247	26.8543	26.8393	26.8254	26.6222	26.7368	26.7247	26.8397	26.6955	0.000538063	0.00235829	-0.144203	0.0378334	1.42212	0.107825	0.967279
A0A0H3C4X9	A0A0H3C4X9_CAUVN			Release factor glutamine methyltransferase	0.000348797	15	14	14	14	14	14	14							26.3815	26.3404	26.315	26.4564	26.4779	26.5648	26.3815	26.3404	26.315	26.4564	26.4779	26.5648	26.3459	26.5005	0.00127251	0.00216556	0.154581	0.0318212	1.49728	0.096907	1.01364
A0A0H3C4Y4	A0A0H3C4Y4_CAUVN			Uncharacterized protein	0.000348797	5	5	5	5	5	5	5							23.8785	23.9332	23.6387	23.9792	23.7424	23.8699	23.8785	23.9332	23.6387	23.9792	23.7424	23.8699	23.8223	23.8671	0.00657583	0.00496529	0.0447302	0.674448	0.171052	0.763683	0.117087
A0A0H3C4Y5	A0A0H3C4Y5_CAUVN			2,3,4,5-tetrahydropyridine-2,6-dicarboxylate N-succinyltransferase	0.000348797	22	22	22	21	21	21	22							30.1715	30.1947	30.2132	30.7969	30.6465	30.6699	30.1715	30.1947	30.2132	30.7969	30.6465	30.6699	30.1932	30.706	0.000691266	0.00263594	0.512767	0.00022483	3.64815	0.00537799	2.26938
A0A0H3C4Y8	A0A0H3C4Y8_CAUVN			GntR family transcriptional regulator	0.000348797	7	7	6	6	7	7	6							25.925	25.277	25.2399	26.1052	26.2712	25.3339	25.925	25.277	25.2399	26.1052	26.2712	25.3339	25.5165	25.9574	0.0151202	0.0193078	0.440903	0.233327	0.632035	0.36592	0.436614
A0A0H3C4Z2	A0A0H3C4Z2_CAUVN			M28 Zn-Peptidase	0.000348797	30	29	29	30	29	28	29							28.0464	28.1128	28.0529	28.0677	27.9218	27.9304	28.0464	28.1128	28.0529	28.0677	27.9218	27.9304	28.071	27.9749	0.00130401	0.0029269	-0.096158	0.168953	0.772233	0.293243	0.532772
A0A0H3C4Z4	A0A0H3C4Z4_CAUVN			Phosphate regulon transcriptional regulatory protein PhoB	0.000348797	14	14	14	13	13	13	12							25.4758	25.285	25.3383	25.3844	25.506	25.5605	25.4758	25.285	25.3383	25.3844	25.506	25.5605	25.3686	25.4855	0.00388071	0.00353702	0.116906	0.19087	0.719263	0.317171	0.498706
A0A0H3C4Z7	A0A0H3C4Z7_CAUVN			Acetyl-CoA acetyltransferase	0.000348797	36	29	27	25	22	23	27							26.9384	26.773	26.9049	26.6775	26.5318	26.7089	26.9384	26.773	26.9049	26.6775	26.5318	26.7089	26.8738	26.6414	0.00325354	0.00354565	-0.232417	0.0258226	1.588	0.0854458	1.06831
A0A0H3C4Z8	A0A0H3C4Z8_CAUVN			Hydroxyacylglutathione hydrolase	0.000348797	13	13	12	12	12	12	12							25.882	25.9202	25.9147	25.9181	25.8734	25.8618	25.882	25.9202	25.9147	25.9181	25.8734	25.8618	25.9057	25.8846	0.000796133	0.00114862	-0.0210692	0.663683	0.178039	0.754037	0.122607
A0A0H3C4Z9	A0A0H3C4Z9_CAUVN			Phosphotransferase family protein	0.000348797	10	10	9	10	10	8	7							24.3083	24.1806	24.8132	23.8603	23.8276	23.6077	24.3083	24.1806	24.8132	23.8603	23.8276	23.6077	24.4607	23.7695	0.013692	0.00577996	-0.691264	0.0129212	1.8887	0.0538414	1.26888
A0A0H3C502	A0A0H3C502_CAUVN			Methyltransferase	0.000348797	8	8	8	8	7	8	7							24.0402	24.0651	24.0109	24.036	24.0956	23.8444	24.0402	24.0651	24.0109	24.036	24.0956	23.8444	24.0389	23.9959	0.0011297	0.00547011	-0.0429635	0.57692	0.238884	0.686712	0.163225
A0A0H3C503	A0A0H3C503_CAUVN			Flagellar hook-associated protein 1	0.000348797	10	7	5	5	5	5	4							22.512	21.0108	21.4696	23.1275	21.0139	20.9052	22.512	21.0108	21.4696	23.1275	21.0139	20.9052	21.8058	22.074	0.0355071	0.0577809	0.2682	0.9811	0.00828678	0.985996	0.00612503
A0A0H3C504	A0A0H3C504_CAUVN			Phospholipid-lipopolysaccharide ABC transporter	0.000348797	19	17	18	18	15	17	18							25.3938	25.6525	25.7144	25.344	25.6358	25.6689	25.3938	25.6525	25.7144	25.344	25.6358	25.6689	25.5934	25.5568	0.00664835	0.00699762	-0.0366462	0.783677	0.105863	0.845314	0.072982
A0A0H3C507	A0A0H3C507_CAUVN			CtrA inhibitory protein SciP	0.000348797	9	8	9	9	7	8	8							27.1506	27.1935	27.0647	26.4727	26.5888	26.437	27.1506	27.1935	27.0647	26.4727	26.5888	26.437	27.1373	26.501	0.00241698	0.00299509	-0.636297	0.000129568	3.8875	0.00387957	2.41122
A0A0H3C508	A0A0H3C508_CAUVN			Putative membrane spanning protein	0.000348797	2	2	2	2	2	2	2							24.4856	24.5972	24.5193	24.3626	24.5562	24.6772	24.4856	24.5972	24.5193	24.3626	24.5562	24.6772	24.5348	24.5378	0.00233242	0.00646815	0.00299004	0.983614	0.00717514	0.986952	0.0057038
A0A0H3C509	A0A0H3C509_CAUVN			Histidine kinase	0.000348797	18	16	17	17	18	17	16							24.8558	24.9244	24.9285	24.9092	25.0037	24.9566	24.8558	24.9244	24.9285	24.9092	25.0037	24.9566	24.9033	24.957	0.00164028	0.00189379	0.0537826	0.350357	0.455489	0.483263	0.315816
A0A0H3C512	A0A0H3C512_CAUVN			Acetyltransferase, GNAT family	0.000348797	10	10	10	9	9	8	9							23.7112	23.9289	23.7062	23.775	23.0123	22.6436	23.7112	23.9289	23.7062	23.775	23.0123	22.6436	23.7859	23.2228	0.00534793	0.0249326	-0.56313	0.0787291	1.10386	0.176048	0.75437
A0A0H3C514	A0A0H3C514_CAUVN			Flagellar motor switch protein FliN	0.000348797	7	6	7	6	7	6	7							25.0736	24.9974	24.9493	25.2524	25.3074	25.2738	25.0736	24.9974	24.9493	25.2524	25.3074	25.2738	25.0077	25.2781	0.00250593	0.00109577	0.270344	0.00327596	2.48466	0.0223907	1.64993
A0A0H3C515	A0A0H3C515_CAUVN			Glucosamine-6-phosphate deaminase	0.000348797	7	4	3	3	7	7	7							20.2723	20.2422	21.181	25.4796	25.3953	25.3949	20.2723	20.2422	21.181	25.4796	25.3953	25.3949	20.6347	25.4238	0.0259438	0.00191895	4.78907	4.53957e-06	5.34299	0.000914269	3.03893
A0A0H3C517	A0A0H3C517_CAUVN			Vegetatible incompatibility protein HET-E-1	0.000348797	17	14	17	14	14	15	16							26.6298	26.6989	26.7867	26.928	26.788	26.8181	26.6298	26.6989	26.7867	26.928	26.788	26.8181	26.7066	26.846	0.00294523	0.00274508	0.139404	0.0914527	1.0388	0.194289	0.711552
A0A0H3C518	A0A0H3C518_CAUVN			Alpha-N-acetylglucosaminidase	0.000348797	18	7	8	7	17	18	18							22.3346	22.1599	22.0092	24.8844	24.8627	24.8404	22.3346	22.1599	22.0092	24.8844	24.8627	24.8404	22.174	24.8626	0.00734674	0.000884321	2.68858	3.32957e-07	6.47761	9.14421e-05	4.03885
A0A0H3C519	A0A0H3C519_CAUVN			TetR-family transcriptional regulator	0.000348797	6	5	5	5	5	5	5							23.0762	22.9697	22.957	23.2481	23.092	22.8453	23.0762	22.9697	22.957	23.2481	23.092	22.8453	23.002	23.0712	0.0028478	0.00880489	0.0692741	0.614018	0.211819	0.717582	0.144128
A0A0H3C520	A0A0H3C520_CAUVN			Putative pyruvate, phosphate dikinase regulatory protein	0.000348797	16	16	16	16	15	16	15							26.2222	26.1435	26.1545	26.3487	26.3994	26.2918	26.2222	26.1435	26.1545	26.3487	26.3994	26.2918	26.1738	26.3473	0.0016281	0.002043	0.173535	0.0216632	1.66428	0.0763419	1.11724
A0A0H3C522	A0A0H3C522_CAUVN			AAA ATPase domain protein	0.000348797	21	21	18	19	17	18	20							25.0741	24.9653	24.9133	24.8581	24.8159	24.7985	25.0741	24.9653	24.9133	24.8581	24.8159	24.7985	24.9858	24.8244	0.0032848	0.00123518	-0.161422	0.0424662	1.37196	0.115995	0.935561
A0A0H3C524	A0A0H3C524_CAUVN			TetR-family transcriptional regulator	0.000348797	6	6	6	6	6	6	6							23.1857	23.1966	23.1172	22.9851	23.2114	23.0576	23.1857	23.1966	23.1172	22.9851	23.2114	23.0576	23.1669	23.0878	0.00185907	0.0050079	-0.079113	0.317703	0.497978	0.452941	0.343959
A0A0H3C527	A0A0H3C527_CAUVN			Chaperone protein DnaK	0.000348797	101	100	97	100	99	97	100							31.3085	31.2262	31.2395	31.4958	31.4573	31.5307	31.3085	31.2262	31.2395	31.4958	31.4573	31.5307	31.2585	31.4949	0.00141463	0.0011649	0.23638	0.00460303	2.33696	0.0273198	1.56352
A0A0H3C529	A0A0H3C529_CAUVN			Dihydrolipoyllysine-residue succinyltransferase component of 2-oxoglutarate dehydrogenase complex	0.000348797	39	38	35	36	38	39	38							31.0847	31.1036	31.1542	31.7632	31.6674	31.574	31.0847	31.1036	31.1542	31.7632	31.6674	31.574	31.1145	31.6703	0.00115389	0.00298672	0.555836	0.000251363	3.5997	0.00569908	2.24419
A0A0H3C530	A0A0H3C530_CAUVN			Hydroxyacylglutathione hydrolase	0.000348797	14	14	13	13	13	14	14							25.9283	25.6811	25.6604	25.686	25.7697	25.8105	25.9283	25.6811	25.6604	25.686	25.7697	25.8105	25.7618	25.7563	0.00578858	0.00246382	-0.00552213	0.98978	0.00446126	0.991092	0.00388584
A0A0H3C532	A0A0H3C532_CAUVN			Ferritin superfamily protein	0.000348797	10	10	10	10	10	10	10							27.3732	27.4887	27.4487	26.6631	26.9922	26.7285	27.3732	27.4887	27.4487	26.6631	26.9922	26.7285	27.4377	26.8017	0.002137	0.00650179	-0.635922	0.00100575	2.99751	0.0112951	1.94711
A0A0H3C533	A0A0H3C533_CAUVN			Molybdopterin converting factor, small subunit	0.000348797	4	3	4	4	3	4	4							22.2484	22.5816	22.4162	22.7219	22.7788	22.4259	22.2484	22.5816	22.4162	22.7219	22.7788	22.4259	22.4218	22.6503	0.00743255	0.008367	0.228471	0.141422	0.849482	0.258618	0.587341
A0A0H3C535	A0A0H3C535_CAUVN			Methyl-accepting chemotaxis protein	0.000348797	29	26	27	27	24	23	21							26.3516	26.4586	26.4882	25.9633	25.6758	25.9175	26.3516	26.4586	26.4882	25.9633	25.6758	25.9175	26.434	25.8576	0.00271893	0.00597589	-0.576398	0.00121895	2.91401	0.0129663	1.88718
A0A0H3C536	A0A0H3C536_CAUVN			Putative aerobic-type carbon monoxide dehydrogenase, small subunit CoxS	0.000348797	5	5	5	5	5	5	5							24.4398	24.5415	24.2844	24.3292	24.5475	24.4626	24.4398	24.5415	24.2844	24.3292	24.5475	24.4626	24.4257	24.4492	0.00530191	0.0045032	0.0234841	0.804061	0.094711	0.860806	0.0650949
A0A0H3C538	A0A0H3C538_CAUVN			O-antigen acetylase	0.00332889	1	1	1	1	1	1	1							18.8433	19.2039	19.124	18.6383	19.1132	18.8227	18.8433	19.2039	19.124	18.6383	19.1132	18.8227	19.0652	18.8714	0.00993809	0.0126946	-0.193754	0.256355	0.591159	0.391728	0.407015
A0A0H3C539	A0A0H3C539_CAUVN			PKHD-type hydroxylase CCNA_00027	0.000348797	13	13	12	13	9	12	11							26.3032	26.3018	26.6499	25.8042	25.8651	26.4958	26.3032	26.3018	26.6499	25.8042	25.8651	26.4958	26.4278	26.0904	0.00759112	0.0146964	-0.337454	0.151976	0.818225	0.272474	0.564674
A0A0H3C541	A0A0H3C541_CAUVN			Delta 3,5-delta2,4-dienoyl-CoA isomerase	0.000348797	14	13	14	14	13	13	13							25.7756	25.7499	25.8288	25.0709	25.1185	25.1338	25.7756	25.7499	25.8288	25.0709	25.1185	25.1338	25.7852	25.108	0.00156239	0.001307	-0.677158	2.05081e-05	4.68808	0.00148358	2.82869
A0A0H3C546	A0A0H3C546_CAUVN			Integral membrane protein	0.000348797	4	4	4	3	3	3	3							22.247	22.1472	22.4099	22.1579	22.0882	22.4653	22.247	22.1472	22.4099	22.1579	22.0882	22.4653	22.2721	22.2466	0.00595642	0.00902377	-0.0254796	0.815894	0.0883661	0.867893	0.0615338
A0A0H3C547	A0A0H3C547_CAUVN			YcxB-like membrane protein	0.000348797	2	2	2	2	2	1	1							20.6291	20.564	20.8998	20.9624	20.7662	21.0003	20.6291	20.564	20.8998	20.9624	20.7662	21.0003	20.7051	20.9132	0.00860363	0.00600806	0.208167	0.12218	0.912999	0.235851	0.627363
A0A0H3C548	A0A0H3C548_CAUVN			Acid phosphatase	0.000348797	11	9	10	11	9	9	10							25.2258	25.5251	25.7565	25.4326	25.2823	25.3217	25.2258	25.5251	25.7565	25.4326	25.2823	25.3217	25.5186	25.347	0.0104338	0.00307489	-0.171684	0.320731	0.49386	0.455625	0.341392
A0A0H3C549	A0A0H3C549_CAUVN			PurR-family transcriptional regulator	0.000348797	12	8	11	10	10	11	11							23.1345	23.2616	23.2145	23.5347	23.5948	23.8018	23.1345	23.2616	23.2145	23.5347	23.5948	23.8018	23.2045	23.6484	0.00276845	0.00592525	0.443923	0.00311604	2.5064	0.0216404	1.66474
A0A0H3C552	A0A0H3C552_CAUVN			Short-chain fatty acids transporter	0.000348797	5	1	1	1	2	0	0							18.1474	18.0594	18.0619	20.832	NA	NA	18.1474	18.0594	18.0619	20.832	20.3399	19.2862	18.0902	20.2851	0.00277062	0.0391877	2.19498	0.00261645	2.58229	0.0191388	1.71809
A0A0H3C553	A0A0H3C553_CAUVN			Phosphonates transport system permease protein phnE	0.000348797	5	5	5	5	5	5	5							24.276	24.5248	24.5948	24.7871	24.7386	24.696	24.276	24.5248	24.5948	24.7871	24.7386	24.696	24.4715	24.7411	0.00684715	0.00184339	0.269512	0.0316377	1.4998	0.0965831	1.0151
A0A0H3C554	A0A0H3C554_CAUVN			N-succinylarginine dihydrolase	0.000348797	29	6	5	5	4	1	2							21.5788	22.0805	22.2475	21.8637	19.6745	21.0716	21.5788	22.0805	22.2475	21.8637	19.6745	21.0716	21.9958	21.1242	0.0158439	0.053112	-0.871658	0.110309	0.957389	0.220108	0.657364
A0A0H3C556	A0A0H3C556_CAUVN			Phosphate starvation-inducible protein PhoH	0.000348797	24	22	23	21	21	23	24							26.788	26.7705	26.8338	26.9047	26.9613	26.997	26.788	26.7705	26.8338	26.9047	26.9613	26.997	26.7977	26.9548	0.00121878	0.00172651	0.157121	0.0246111	1.60887	0.083076	1.08052
A0A0H3C557	A0A0H3C557_CAUVN			ATP synthase subunit a	0.000348797	5	5	5	4	4	5	5							25.5077	25.6428	25.6183	25.8498	25.8483	26.0612	25.5077	25.6428	25.6183	25.8498	25.8483	26.0612	25.5908	25.9233	0.00281265	0.00472675	0.332516	0.00852291	2.06941	0.0413307	1.38373
A0A0H3C558	A0A0H3C558_CAUVN			Uncharacterized protein	0.000348797	8	8	7	7	8	8	7							24.2034	24.1942	24.1017	24.3523	24.2976	24.3845	24.2034	24.1942	24.1017	24.3523	24.2976	24.3845	24.1672	24.3452	0.00232771	0.00180401	0.178061	0.0206015	1.6861	0.0741803	1.12971
A0A0H3C562	A0A0H3C562_CAUVN			Thiol:disulfide interchange protein dsbA	0.000348797	18	17	18	17	17	18	17							29.0346	29.0404	29.0367	29.2097	29.1172	29.083	29.0346	29.0404	29.0367	29.2097	29.1172	29.083	29.0372	29.1376	0.000100302	0.00225035	0.100392	0.117403	0.930322	0.229904	0.638453
A0A0H3C563	A0A0H3C563_CAUVN			tRNA N6-adenosine threonylcarbamoyltransferase	0.000348797	21	20	17	19	18	19	18							25.5719	25.4303	25.4928	25.5632	25.5886	25.6332	25.5719	25.4303	25.4928	25.5632	25.5886	25.6332	25.4995	25.5953	0.00278367	0.0013855	0.095777	0.150842	0.821477	0.270893	0.567202
A0A0H3C565	A0A0H3C565_CAUVN			3-ketoacyl-CoA thiolase	0.000348797	25	24	25	24	24	24	22							27.938	27.9388	27.798	27.954	27.9876	28.0614	27.938	27.9388	27.798	27.954	27.9876	28.0614	27.8931	28.0017	0.00290638	0.00196253	0.108637	0.145475	0.837212	0.263635	0.578997
A0A0H3C566	A0A0H3C566_CAUVN			DNA-3-methyladenine glycosylase	0.0010142	1	1	1	1	1	0	1							20.0426	20.0382	20.356	18.9605	NA	19.6084	20.0426	20.0382	20.356	18.9605	20.2054	19.6084	20.1535	19.6791	0.00904593	0.0317789	-0.474322	0.143019	0.844608	0.260676	0.583899
A0A0H3C567	A0A0H3C567_CAUVN			LexA-related transcriptional repressor	0.000348797	6	6	6	5	6	6	6							23.2654	23.2952	22.8892	23.1362	22.9606	23.3117	23.2654	23.2952	22.8892	23.1362	22.9606	23.3117	23.1614	23.1433	0.00977363	0.00758958	-0.0180974	0.929268	0.031859	0.952602	0.0210884
A0A0H3C568	A0A0H3C568_CAUVN			Putative pentapeptide repeat protein	0.0010142	4	3	3	3	2	4	4							19.1899	20.4408	20.137	19.5928	20.6347	20.3653	19.1899	20.4408	20.137	19.5928	20.6347	20.3653	20.0131	20.261	0.0327486	0.0267779	0.247931	0.540724	0.267024	0.652889	0.185161
A0A0H3C569	A0A0H3C569_CAUVN			ROS/MUCR transcriptional regulator MucR1	0.000348797	14	13	13	14	13	13	13							27.8334	27.9456	27.8535	27.5505	27.5675	27.4197	27.8334	27.9456	27.8535	27.5505	27.5675	27.4197	27.8783	27.5141	0.00214551	0.00293948	-0.364244	0.00194735	2.71056	0.0165251	1.78185
A0A0H3C571	A0A0H3C571_CAUVN			Glutamate dehydrogenase	0.000348797	135	104	103	96	93	93	95							29.3403	29.3292	29.3437	29.0545	28.9685	29.0601	29.3403	29.3292	29.3437	29.0545	28.9685	29.0601	29.3378	29.0283	0.000259148	0.0017706	-0.30943	0.00113074	2.94664	0.0124217	1.90582
A0A0H3C572	A0A0H3C572_CAUVN			Methyl-accepting chemotaxis protein	0.000348797	7	5	6	6	3	3	3							21.3964	21.9384	21.7516	20.4633	19.4246	19.9627	21.3964	21.9384	21.7516	20.4633	19.4246	19.9627	21.7126	20.0116	0.0126919	0.0260376	-1.70097	0.001447	2.83953	0.0141086	1.85052
A0A0H3C573	A0A0H3C573_CAUVN			Uncharacterized protein	0.000348797	6	5	6	6	5	5	6							23.3172	23.3098	23.322	23.1681	23.1618	23.3489	23.3172	23.3098	23.322	23.1681	23.1618	23.3489	23.3163	23.2289	0.000262604	0.00457596	-0.0874058	0.236407	0.62634	0.368897	0.433094
A0A0H3C574	A0A0H3C574_CAUVN			Stress response protein CsbD	0.000348797	4	4	4	3	4	3	3							26.5018	26.5929	26.3808	26.4377	26.0693	25.728	26.5018	26.5929	26.3808	26.4377	26.0693	25.728	26.4944	26.1074	0.00401507	0.0136104	-0.387062	0.0750626	1.12458	0.170089	0.769325
A0A0H3C578	A0A0H3C578_CAUVN			L-asparaginase	0.000348797	10	10	10	9	8	9	9							25.6125	25.559	25.6197	25.4574	25.6166	25.6419	25.6125	25.559	25.6197	25.4574	25.6166	25.6419	25.5973	25.5742	0.00129595	0.00391184	-0.0230761	0.72309	0.140807	0.799581	0.0971374
A0A0H3C579	A0A0H3C579_CAUVN			Uncharacterized protein	0.000348797	9	8	8	8	6	9	8							22.7904	22.7149	22.5194	22.707	23.1593	22.9514	22.7904	22.7149	22.5194	22.707	23.1593	22.9514	22.6794	22.951	0.00616951	0.00986856	0.271641	0.109701	0.959791	0.219329	0.658905
A0A0H3C582	A0A0H3C582_CAUVN			16S rRNA m5C methyltransferase RsmB	0.000348797	13	13	13	13	12	13	13							25.2759	25.1961	25.2408	25.1956	25.1867	25.2891	25.2759	25.1961	25.2408	25.1956	25.1867	25.2891	25.238	25.2245	0.00158537	0.00224846	-0.0134175	0.809865	0.0915875	0.865295	0.062836
A0A0H3C583	A0A0H3C583_CAUVN			Heme:hemopexin-binding protein	0.000348797	12	10	11	10	9	8	10							23.1712	23.3632	23.4724	22.752	23.0092	23.1843	23.1712	23.3632	23.4724	22.752	23.0092	23.1843	23.3409	22.9926	0.00653516	0.0094605	-0.348311	0.0467912	1.32984	0.124433	0.905063
A0A0H3C584	A0A0H3C584_CAUVN			Uncharacterized protein	0.000348797	18	16	15	15	14	14	15							25.0753	25.4475	25.688	25.8177	25.5364	25.3892	25.0753	25.4475	25.688	25.8177	25.5364	25.3892	25.4252	25.5922	0.012152	0.00851075	0.167003	0.393763	0.404765	0.524369	0.280363
A0A0H3C585	A0A0H3C585_CAUVN			Enoyl-CoA hydratase	0.000348797	8	8	8	8	8	8	8							25.4995	25.3218	25.4475	25.8011	25.9105	25.7247	25.4995	25.3218	25.4475	25.8011	25.9105	25.7247	25.4249	25.8141	0.00359351	0.00361671	0.389273	0.00314933	2.50178	0.0217714	1.66211
A0A0H3C586	A0A0H3C586_CAUVN			Lon endopeptidase-related protein	0.000348797	8	8	8	8	8	8	8							25.1879	25.2366	25.2061	25.4301	25.4876	25.397	25.1879	25.2366	25.2061	25.4301	25.4876	25.397	25.2104	25.4387	0.000975681	0.0018032	0.228359	0.00477241	2.32126	0.027995	1.55292
A0A0H3C588	A0A0H3C588_CAUVN			Flagellar biosynthetic protein FliP	0.000348797	3	3	3	3	2	3	3							23.1671	23.1823	23.0636	23.4592	23.6748	23.5323	23.1671	23.1823	23.0636	23.4592	23.6748	23.5323	23.1387	23.5582	0.0027921	0.00465289	0.41958	0.00207857	2.68223	0.01711	1.76675
A0A0H3C589	A0A0H3C589_CAUVN			Alginate_exp domain-containing protein	0.000348797	21	17	18	21	12	9	11							24.7308	25.3654	26.5678	23.5414	22.3293	22.6682	24.7308	25.3654	26.5678	23.5414	22.3293	22.6682	25.7606	22.9402	0.0365101	0.027373	-2.82045	0.00369894	2.43192	0.0240312	1.61922
A0A0H3C590	A0A0H3C590_CAUVN			Uncharacterized protein	0.0010142	1	1	1	1	1	1	1							19.8596	19.9897	19.9109	20.2942	20.2178	20.665	19.8596	19.9897	19.9109	20.2942	20.2178	20.665	19.9211	20.4059	0.00328898	0.0117305	0.484825	0.0129209	1.88871	0.0538414	1.26888
A0A0H3C591	A0A0H3C591_CAUVN			DNA transformation protein tfoX	0.00332889	1	1	1	1	1	1	1							19.4059	18.7887	19.1418	18.6316	20.0358	19.6871	19.4059	18.7887	19.1418	18.6316	20.0358	19.6871	19.134	19.564	0.0162007	0.0375894	0.429968	0.42686	0.369714	0.551088	0.258779
A0A0H3C592	A0A0H3C592_CAUVN			TsaA-like domain-containing protein	0.000348797	6	6	5	6	6	6	6							24.7839	24.5852	24.6224	24.7895	24.7936	24.6329	24.7839	24.5852	24.6224	24.7895	24.7936	24.6329	24.6665	24.7406	0.00428386	0.00370367	0.0741238	0.395932	0.40238	0.525846	0.279142
A0A0H3C596	A0A0H3C596_CAUVN			Uncharacterized protein	0.000348797	8	7	7	7	7	8	8							24.7126	24.5904	24.4763	24.6512	24.5769	24.651	24.7126	24.5904	24.4763	24.6512	24.5769	24.651	24.5964	24.6268	0.0048051	0.00174065	0.0304473	0.675917	0.170107	0.764773	0.116467
A0A0H3C597	A0A0H3C597_CAUVN			Uncharacterized protein	0.000348797	22	22	22	22	21	21	22							28.2171	28.1727	28.047	28.3195	28.2231	28.1335	28.2171	28.1727	28.047	28.3195	28.2231	28.1335	28.1474	28.2274	0.00313479	0.00329447	0.0800016	0.340215	0.468246	0.473473	0.324705
A0A0H3C598	A0A0H3C598_CAUVN			Multicopper oxidase PcoA	0.000348797	18	18	17	16	17	17	17							25.615	25.678	25.5149	25.6268	25.2915	25.2541	25.615	25.678	25.5149	25.6268	25.2915	25.2541	25.6042	25.4008	0.00321234	0.00808242	-0.203411	0.126244	0.898789	0.240772	0.618393
A0A0H3C5A0	A0A0H3C5A0_CAUVN			Rrf2 family protein	0.000348797	8	8	8	8	8	8	8							24.9263	24.9448	24.8384	25.2353	25.2059	25.1738	24.9263	24.9448	24.8384	25.2353	25.2059	25.1738	24.9039	25.2052	0.00228188	0.00122047	0.301285	0.00178871	2.74746	0.0156176	1.80639
A0A0H3C5A3	A0A0H3C5A3_CAUVN			Histidine kinase	0.000348797	6	6	6	5	6	6	6							24.0547	24.0798	23.8402	23.9208	23.5305	24.0508	24.0547	24.0798	23.8402	23.9208	23.5305	24.0508	23.9955	23.8505	0.00548902	0.011361	-0.145038	0.352428	0.45293	0.483948	0.315202
A0A0H3C5A4	A0A0H3C5A4_CAUVN			LacI-family transcriptional regulator	0.000348797	7	7	7	6	6	6	7							23.2857	23.1291	23.0859	23.0205	23.1353	23.0927	23.2857	23.1291	23.0859	23.0205	23.1353	23.0927	23.1695	23.0836	0.0045378	0.00251438	-0.0858732	0.297872	0.52597	0.433664	0.362847
A0A0H3C5A5	A0A0H3C5A5_CAUVN			Type I site-specific deoxyribonuclease	0.000348797	13	10	12	10	7	10	13							23.8565	23.4942	23.5986	23.2537	23.2983	23.5082	23.8565	23.4942	23.5986	23.2537	23.2983	23.5082	23.6579	23.3577	0.00788645	0.00582052	-0.300151	0.0552631	1.25756	0.138893	0.857318
A0A0H3C5A7	A0A0H3C5A7_CAUVN			Ribosomal RNA small subunit methyltransferase I	0.000348797	17	17	15	17	16	16	16							26.2954	26.2815	26.3262	26.3679	26.4678	26.4104	26.2954	26.2815	26.3262	26.3679	26.4678	26.4104	26.3012	26.4159	0.00086966	0.00189708	0.114763	0.0686121	1.1636	0.15969	0.796723
A0A0H3C5A8	A0A0H3C5A8_CAUVN			Uncharacterized protein	0.000348797	7	7	7	7	7	7	7							24.9132	24.9441	24.9178	24.8474	24.5985	24.6799	24.9132	24.9441	24.9178	24.8474	24.5985	24.6799	24.9251	24.7124	0.000668999	0.00513479	-0.212757	0.0330216	1.4812	0.0991733	1.00361
A0A0H3C5B0	A0A0H3C5B0_CAUVN			GAF-family sensor histidine kinase	0.000348797	8	6	7	8	6	6	7							22.9108	22.6091	22.8913	22.1616	22.2462	22.7104	22.9108	22.6091	22.8913	22.1616	22.2462	22.7104	22.8102	22.3936	0.00740331	0.0132063	-0.416586	0.0518452	1.28529	0.132958	0.876286
A0A0H3C5B2	A0A0H3C5B2_CAUVN			Glyoxalase family protein	0.000348797	4	3	4	4	3	4	2							24.7263	24.7423	24.6587	24.3162	24.2378	24.3005	24.7263	24.7423	24.6587	24.3162	24.2378	24.3005	24.7096	24.2852	0.00179577	0.0017077	-0.424324	0.000299324	3.52386	0.00625003	2.20412
A0A0H3C5B3	A0A0H3C5B3_CAUVN			Peptidylprolyl isomerase	0.000348797	15	15	14	12	12	14	12							25.4137	25.3915	25.3329	25.1954	25.1977	25.0007	25.4137	25.3915	25.3329	25.1954	25.1977	25.0007	25.3798	25.1342	0.00164465	0.00449844	-0.24557	0.0171084	1.76679	0.0653298	1.18489
A0A0H3C5B4	A0A0H3C5B4_CAUVN			ABC-type polysaccharide/polyol phosphate transport system, ATPase component	0.000348797	11	11	11	10	11	11	11							25.6881	25.7412	25.1701	25.4088	25.759	25.7422	25.6881	25.7412	25.1701	25.4088	25.759	25.7422	25.5551	25.6454	0.0123568	0.0077039	0.0902851	0.605809	0.217665	0.710461	0.14846
A0A0H3C5B6	A0A0H3C5B6_CAUVN			O-antigen polymerase	0.000348797	19	19	16	19	18	16	18							26.4363	26.3125	26.583	26.8028	26.5028	26.8631	26.4363	26.3125	26.583	26.8028	26.5028	26.8631	26.4482	26.7313	0.00512095	0.00722136	0.283154	0.0702672	1.15325	0.161673	0.791361
A0A0H3C5B7	A0A0H3C5B7_CAUVN			Gamma-glutamyltranspeptidase	0.000348797	43	35	34	28	30	33	27							28.0298	27.9161	26.7217	28.2081	28.0439	27.1062	28.0298	27.9161	26.7217	28.2081	28.0439	27.1062	27.664	27.8609	0.0262966	0.0213958	0.196948	0.640534	0.193458	0.73755	0.132208
A0A0H3C5B8	A0A0H3C5B8_CAUVN			Uncharacterized protein	0.000348797	6	5	4	6	5	6	5							21.6006	21.4495	21.2697	22.0869	21.6998	22.129	21.6006	21.4495	21.2697	22.0869	21.6998	22.129	21.4462	21.9844	0.00772755	0.0107682	0.538181	0.013952	1.85536	0.0567282	1.2462
A0A0H3C5C1	A0A0H3C5C1_CAUVN			General secretion pathway protein F	0.000348797	4	3	3	3	2	4	3							21.9901	21.6867	21.656	21.513	22.4869	22.0179	21.9901	21.6867	21.656	21.513	22.4869	22.0179	21.7857	22.06	0.00847976	0.0221332	0.274301	0.419231	0.377547	0.544581	0.263937
A0A0H3C5C5	A0A0H3C5C5_CAUVN			Conserved hypothetical cytosolic protein	0.000348797	4	4	4	4	4	4	4							23.1326	23.2804	23.1969	23.4132	23.5887	23.6048	23.1326	23.2804	23.1969	23.4132	23.5887	23.6048	23.2046	23.5382	0.00319312	0.00451564	0.333599	0.00623989	2.20482	0.0334826	1.47518
A0A0H3C5C6	A0A0H3C5C6_CAUVN			Uncharacterized protein	0.000348797	7	7	7	7	7	7	7							25.6058	25.5551	25.433	25.2001	25.1391	24.9457	25.6058	25.5551	25.433	25.2001	25.1391	24.9457	25.5331	25.099	0.00347794	0.00529086	-0.434153	0.00368227	2.43388	0.0239744	1.62025
A0A0H3C5C8	A0A0H3C5C8_CAUVN			ABC transporter ATP-binding protein	0.000348797	23	23	22	22	21	23	23							26.9529	26.8901	26.98	27.2176	27.0999	27.1755	26.9529	26.8901	26.98	27.2176	27.0999	27.1755	26.9415	27.1652	0.00171073	0.00219597	0.223673	0.00915912	2.03815	0.0428923	1.36762
A0A0H3C5C9	A0A0H3C5C9_CAUVN			Zinc-finger domain protein	0.000348797	8	8	8	8	7	7	8							26.3005	26.27	26.1961	26.581	26.3261	26.3812	26.3005	26.27	26.1961	26.581	26.3261	26.3812	26.2562	26.4337	0.00204571	0.00507472	0.177468	0.086258	1.0642	0.186934	0.728313
A0A0H3C5D0	A0A0H3C5D0_CAUVN			PAS-family GGDEF/EAL protein	0.000348797	18	18	14	16	9	10	13							24.2489	23.8512	23.863	22.7853	23.1008	23.3572	24.2489	23.8512	23.863	22.7853	23.1008	23.3572	23.9998	23.0999	0.00943242	0.0124125	-0.899946	0.00360836	2.44269	0.0237491	1.62435
A0A0H3C5D1	A0A0H3C5D1_CAUVN			GT1 family glyscosyl transferase	0.000348797	27	24	24	23	23	24	24							26.0031	25.942	25.9002	25.8551	26.0351	26.0128	26.0031	25.942	25.9002	25.8551	26.0351	26.0128	25.949	25.9699	0.00199372	0.00377995	0.0208353	0.791724	0.101426	0.851477	0.0698272
A0A0H3C5D2	A0A0H3C5D2_CAUVN			Antibiotic biosynthesis monooxygenase family protein	0.000348797	13	11	13	12	13	13	13							26.1526	26.1426	25.9813	26.365	26.2726	26.3334	26.1526	26.1426	25.9813	26.365	26.2726	26.3334	26.0943	26.3242	0.00368537	0.00178474	0.229951	0.0166704	1.77806	0.0646485	1.18944
A0A0H3C5D3	A0A0H3C5D3_CAUVN			Uncharacterized protein	0.000348797	8	8	8	8	8	8	8							24.7475	24.6085	24.6714	24.9681	24.8301	24.8764	24.7475	24.6085	24.6714	24.9681	24.8301	24.8764	24.6769	24.8927	0.00282173	0.00282282	0.215738	0.0183342	1.73674	0.0681275	1.16668
A0A0H3C5D4	A0A0H3C5D4_CAUVN			Outer membrane protein	0.000348797	22	22	22	22	21	22	21							29.7145	29.6362	29.5686	29.5142	29.4239	29.348	29.7145	29.6362	29.5686	29.5142	29.4239	29.348	29.641	29.4303	0.00246349	0.00282683	-0.210674	0.025664	1.59067	0.0852927	1.06909
A0A0H3C5D5	A0A0H3C5D5_CAUVN			Uncharacterized protein	0.000348797	5	3	4	1	3	5	4							24.5001	24.3472	24.0484	25.0735	25.5664	24.9113	24.5001	24.3472	24.0484	25.0735	25.5664	24.9113	24.3105	25.2114	0.00945494	0.0135476	0.900854	0.00666227	2.17638	0.0349422	1.45665
A0A0H3C5D6	A0A0H3C5D6_CAUVN			SDR pteridine reductase	0.000348797	16	16	16	15	14	14	15							26.3243	26.2249	26.2098	26.4595	26.3874	26.3519	26.3243	26.2249	26.2098	26.4595	26.3874	26.3519	26.2539	26.4003	0.00236847	0.00207826	0.146412	0.0517456	1.28613	0.132815	0.876752
A0A0H3C5D7	A0A0H3C5D7_CAUVN	A0A0H3CC87; A0A0H3C5D7	CCNA_00206;CCNA_02488	Succinyl-CoA:3-ketoacid-coenzyme A transferase subunit A	0.000348797	21	16	19	16	17	16	15	4	4	2	4	3	4	27.113	27.1652	26.9529	26.7789	26.7238	26.7184	27.113	27.1652	26.9529	26.7789	26.7238	26.7184	27.0798	26.7406	0.00408536	0.00125184	-0.339202	0.00419051	2.37773	0.025837	1.58776
A0A0H3C5D9	A0A0H3C5D9_CAUVN			Uncharacterized protein	0.000348797	18	16	16	18	16	15	16							24.3686	25.5868	25.7106	25.7506	24.4459	24.6913	24.3686	25.5868	25.7106	25.7506	24.4459	24.6913	25.3349	25.08	0.0294043	0.0277773	-0.25492	0.6273	0.202525	0.727475	0.138182
A0A0H3C5E1	A0A0H3C5E1_CAUVN			Porphyromonas-type peptidyl-arginine deiminase	0.000348797	21	19	20	21	20	21	21							28.3873	28.3688	28.385	28.7097	28.5298	28.6724	28.3873	28.3688	28.385	28.7097	28.5298	28.6724	28.3804	28.6394	0.000354772	0.00331552	0.258993	0.00829716	2.08107	0.0408236	1.38909
A0A0H3C5E2	A0A0H3C5E2_CAUVN			AsnC-family transcriptional regulator	0.000348797	2	0	0	0	2	2	1							NA	NA	NA	20.824	20.4434	15.3569	20.2465	21.0298	20.448	20.824	20.4434	15.3569	20.6142	20.0795	0.0197688	0.161724	-0.534681	0.311729	0.506222	0.446878	0.349811
A0A0H3C5E3	A0A0H3C5E3_CAUVN			Type I secretion protein CdzB, adaptor	0.000348797	24	22	22	22	23	24	24							27.4331	27.3483	27.1999	27.5462	27.4761	27.7924	27.4331	27.3483	27.1999	27.5462	27.4761	27.7924	27.3303	27.6114	0.00431832	0.00601766	0.281084	0.0481636	1.31728	0.126965	0.896315
A0A0H3C5E5	A0A0H3C5E5_CAUVN			Methyl-accepting chemotaxis protein	0.0010142	3	2	2	3	2	3	1							20.1709	20.3143	20.8891	19.7039	20.2596	16.0926	20.1709	20.3143	20.8891	19.7039	20.2596	16.0926	20.4927	19.4704	0.0185789	0.121083	-1.02233	0.174809	0.757437	0.300739	0.521811
A0A0H3C5E6	A0A0H3C5E6_CAUVN			Hot dog superfamily protein	0.000348797	11	11	11	11	9	11	11							25.3694	25.4205	25.4674	25.1041	25.1597	25.2531	25.3694	25.4205	25.4674	25.1041	25.1597	25.2531	25.4197	25.1736	0.00192802	0.00298935	-0.246045	0.00855922	2.06757	0.0413307	1.38373
A0A0H3C5E8	A0A0H3C5E8_CAUVN			Acyl-CoA dehydrogenase	0.000348797	20	20	20	19	18	18	20							26.6019	26.7171	26.4893	26.2583	26.0876	26.0691	26.6019	26.7171	26.4893	26.2583	26.0876	26.0691	26.6058	26.1409	0.00428177	0.00399021	-0.464897	0.00244953	2.61092	0.0186134	1.73017
A0A0H3C5E9	A0A0H3C5E9_CAUVN			Histidine kinase	0.000348797	41	39	41	40	37	35	37							27.7433	27.6842	27.7003	27.654	27.5349	27.5785	27.7433	27.6842	27.7003	27.654	27.5349	27.5785	27.7095	27.5899	0.00110116	0.0021841	-0.119549	0.0724403	1.14002	0.165164	0.782085
A0A0H3C5F0	A0A0H3C5F0_CAUVN			Esterase lipase Family protein	0.000348797	7	3	5	5	7	7	7							22.7066	22.9507	23.7802	25.0398	24.9119	24.934	22.7066	22.9507	23.7802	25.0398	24.9119	24.934	23.2223	24.963	0.024314	0.00273833	1.74069	0.00100395	2.99829	0.0112951	1.94711
A0A0H3C5F2	A0A0H3C5F2_CAUVN			GumN superfamily protein	0.000348797	22	22	22	21	22	21	22							26.4051	26.2981	26.2814	26.1415	26.1971	26.5237	26.4051	26.2981	26.2814	26.1415	26.1971	26.5237	26.3292	26.2975	0.0025481	0.00785616	-0.0317082	0.737669	0.132139	0.809774	0.0916362
A0A0H3C5F3	A0A0H3C5F3_CAUVN			CheU protein	0.000348797	2	2	2	2	1	1	2							22.3151	22.1572	22.1199	21.3788	21.2363	21.5407	22.3151	22.1572	22.1199	21.3788	21.2363	21.5407	22.1999	21.3906	0.00466812	0.0071229	-0.809251	0.00031493	3.50179	0.00629627	2.20092
A0A0H3C5F5	A0A0H3C5F5_CAUVN			DegQ-family trypsin-like serine prototease	0.000348797	6	6	6	6	5	6	5							23.2353	23.2249	23.3736	23.0214	23.2046	23.1414	23.2353	23.2249	23.3736	23.0214	23.2046	23.1414	23.2796	23.1245	0.00356737	0.00402365	-0.155101	0.088094	1.05505	0.189688	0.72196
A0A0H3C5F7	A0A0H3C5F7_CAUVN			Type I protein secretion ATP-binding protein RsaD	0.000348797	27	27	25	25	24	25	24							27.756	27.8444	27.8862	27.7756	27.9026	28.0369	27.756	27.8444	27.8862	27.7756	27.9026	28.0369	27.8299	27.909	0.00238841	0.00468256	0.0790995	0.403311	0.394359	0.531275	0.274681
A0A0H3C5F8	A0A0H3C5F8_CAUVN	A0A0H3C515; A0A0H3C5F8	CCNA_00453;CCNA_00569	Glucosamine-6-phosphate deaminase	0.000348797	26	14	10	13	26	26	26	5	5	5	9	9	9	25.5349	25.4524	25.8055	30.6955	30.5783	30.6331	25.5349	25.4524	25.8055	30.6955	30.5783	30.6331	25.6056	30.6364	0.00721484	0.0019132	5.0308	2.30971e-08	7.63644	2.24487e-05	4.64881
A0A0H3C5G2	A0A0H3C5G2_CAUVN			Glycosyltransferase	0.000348797	21	19	21	18	18	19	20							26.0042	26.018	25.9057	26.1531	26.1126	26.2663	26.0042	26.018	25.9057	26.1531	26.1126	26.2663	25.9768	26.1788	0.00235698	0.00304305	0.201955	0.0246243	1.60864	0.083076	1.08052
A0A0H3C5G3	A0A0H3C5G3_CAUVN	A0A0H3C778; A0A0H3C5G3	CCNA_00458;CCNA_00572	PTS system, N-acetylglucosamine-specific IIBC component	0.000348797	29	11	11	13	28	29	29	10	10	11	23	24	24	23.1561	23.1173	23.0262	28.3096	28.4989	28.6217	23.1561	23.1173	23.0262	28.3096	28.4989	28.6217	23.1009	28.4824	0.00288856	0.00552221	5.38151	9.26686e-09	8.03307	1.39976e-05	4.85395
A0A0H3C5G4	A0A0H3C5G4_CAUVN			WecE-family cell wall biogenesis enzyme	0.000348797	13	12	12	11	11	12	11							24.6363	24.6263	24.6203	24.7969	24.5951	24.8761	24.6363	24.6263	24.6203	24.7969	24.5951	24.8761	24.6276	24.7608	0.000327562	0.00585141	0.133183	0.179685	0.745488	0.305671	0.514746
A0A0H3C5G5	A0A0H3C5G5_CAUVN			Ferrous iron transport protein B	0.000348797	28	26	26	27	27	27	27							27.2242	27.3196	27.4619	27.6353	27.6562	28.2214	27.2242	27.3196	27.4619	27.6353	27.6562	28.2214	27.3386	27.8642	0.0043753	0.0119449	0.525613	0.0350145	1.45575	0.102698	0.988438
A0A0H3C5G7	A0A0H3C5G7_CAUVN			Serine kinase/phosphatase HprK	0.000348797	6	6	5	5	4	6	6							25.9821	25.8612	24.7396	25.6459	25.2626	25.0101	25.9821	25.8612	24.7396	25.6459	25.2626	25.0101	25.625	25.3301	0.026838	0.0126511	-0.294921	0.580197	0.236424	0.690069	0.161107
A0A0H3C5G8	A0A0H3C5G8_CAUVN			Uncharacterized protein	0.000348797	6	6	4	5	5	6	5							23.7845	22.7449	24.1291	24.0376	23.7981	24.0055	23.7845	22.7449	24.1291	24.0376	23.7981	24.0055	23.6623	23.9509	0.0305944	0.00542982	0.288659	0.325552	0.48738	0.459361	0.337846
A0A0H3C5G9	A0A0H3C5G9_CAUVN			Glycosyltransferase	0.000348797	38	34	36	37	36	38	37							29.1659	29.1901	29.1794	29.6624	29.7015	29.7639	29.1659	29.1901	29.1794	29.6624	29.7015	29.7639	29.1785	29.7099	0.000414424	0.00172337	0.531362	7.52588e-05	4.12344	0.00287793	2.54092
A0A0H3C5H0	A0A0H3C5H0_CAUVN			Nodulin-21 / CCC1-related protein	0.000348797	2	2	2	2	1	1	2							21.3282	21.4334	20.8162	20.1313	19.9597	19.9128	21.3282	21.4334	20.8162	20.1313	19.9597	19.9128	21.2167	20.0044	0.0155805	0.00575142	-1.21236	0.000809987	3.09152	0.0107323	1.96931
A0A0H3C5H2	A0A0H3C5H2_CAUVN			Cyclohexanol dehydrogenase	0.000348797	7	6	6	7	5	6	7							23.1793	22.9803	23.3249	22.8275	23.628	22.9124	23.1793	22.9803	23.3249	22.8275	23.628	22.9124	23.1684	23.1694	0.00746943	0.0190153	0.00102612	0.875963	0.0575144	0.913772	0.0391622
A0A0H3C5H3	A0A0H3C5H3_CAUVN			GDP-L-fucose synthase	0.000348797	13	13	13	13	13	13	13							26.6526	26.6562	26.8582	26.8259	26.8162	26.8087	26.6526	26.6562	26.8582	26.8259	26.8162	26.8087	26.7256	26.8169	0.00440403	0.000321324	0.0913283	0.242967	0.614452	0.376606	0.424113
A0A0H3C5H4	A0A0H3C5H4_CAUVN			Beta/gamma crystallin family protein	0.000348797	6	4	4	5	2	3	4							21.3512	22.2495	22.4794	21.6617	21.894	22.479	21.3512	22.2495	22.4794	21.6617	21.894	22.479	22.1024	22.0538	0.027067	0.0191328	-0.0486638	0.968339	0.0139728	0.97732	0.00996305
A0A0H3C5H5	A0A0H3C5H5_CAUVN			Zinc metalloprotease	0.000348797	5	3	3	2	3	3	3							20.6577	20.7898	20.3174	20.9532	21.0172	21.2795	20.6577	20.7898	20.3174	20.9532	21.0172	21.2795	20.6017	21.0903	0.0118386	0.00820004	0.488628	0.0208989	1.67988	0.0747105	1.12662
A0A0H3C5H6	A0A0H3C5H6_CAUVN			Histidine kinase	0.000348797	16	15	15	15	15	16	16							24.5494	24.5067	24.6836	24.6484	24.7023	24.764	24.5494	24.5067	24.6836	24.6484	24.7023	24.764	24.5818	24.7057	0.00375541	0.00233974	0.123814	0.12336	0.908824	0.237522	0.624297
A0A0H3C5H9	A0A0H3C5H9_CAUVN			Uncharacterized protein	0.000348797	6	6	6	5	6	6	6							24.7557	24.7084	24.672	24.8384	24.6563	24.7365	24.7557	24.7084	24.672	24.8384	24.6563	24.7365	24.7124	24.7457	0.00169928	0.0036885	0.0332381	0.64657	0.189384	0.742413	0.129355
A0A0H3C5I0	A0A0H3C5I0_CAUVN			Pyridoxal kinase	0.000348797	20	18	20	20	20	19	20							26.9691	26.9255	26.9416	27.1423	27.087	27.035	26.9691	26.9255	26.9416	27.1423	27.087	27.035	26.9455	27.0888	0.000818942	0.00197945	0.143267	0.0353055	1.45216	0.103151	0.986528
A0A0H3C5I2	A0A0H3C5I2_CAUVN			HipB transcriptional regulator	0.000348797	2	2	2	2	2	2	1							21.2794	21.5226	21.5004	21.7352	21.7729	20.3628	21.2794	21.5226	21.5004	21.7352	21.7729	20.3628	21.4382	21.4209	0.00627363	0.0377392	-0.0173218	0.736152	0.133032	0.80958	0.0917403
A0A0H3C5I3	A0A0H3C5I3_CAUVN			Cytosine-specific methyltransferase	0.000348797	10	9	8	7	6	7	9							24.5028	24.2651	24.4666	24.5325	24.4938	24.6193	24.5028	24.2651	24.4666	24.5325	24.4938	24.6193	24.4152	24.5495	0.0052456	0.00261708	0.134275	0.153466	0.813987	0.274604	0.561293
A0A0H3C5I4	A0A0H3C5I4_CAUVN			Uncharacterized protein	0.000348797	6	6	6	6	6	6	6							24.6717	24.7496	24.6639	24.8065	24.6409	24.7799	24.6717	24.7496	24.6639	24.8065	24.6409	24.7799	24.6956	24.7442	0.00191838	0.00359519	0.0486186	0.499863	0.301149	0.618521	0.208646
A0A0H3C5I6	A0A0H3C5I6_CAUVN			TonB-dependent receptor	0.0010142	2	1	1	1	1	2	1							17.5726	16.7623	14.8437	17.2417	18.4525	17.0332	17.5726	16.7623	14.8437	17.2417	18.4525	17.0332	16.7709	17.7203	0.0854919	0.0436024	0.949343	0.190741	0.719555	0.317132	0.498759
A0A0H3C5I7	A0A0H3C5I7_CAUVN			2-dehydropantoate 2-reductase	0.000348797	9	8	8	9	9	9	8							24.8547	24.9558	25.1585	25.3757	25.2176	25.3881	24.8547	24.9558	25.1585	25.3757	25.2176	25.3881	24.9953	25.3292	0.00619132	0.00375178	0.333887	0.0169806	1.77005	0.0650741	1.18659
A0A0H3C5I8	A0A0H3C5I8_CAUVN			Peptide methionine sulfoxide reductase MsrA	0.000348797	13	12	13	12	11	11	11							24.585	24.4314	24.5311	24.0875	24.1481	24.0163	24.585	24.4314	24.5311	24.0875	24.1481	24.0163	24.5172	24.085	0.00317788	0.00273869	-0.432263	0.000900103	3.04571	0.0109982	1.95868
A0A0H3C5I9	A0A0H3C5I9_CAUVN			TetR family transcriptional regulator	0.000348797	5	5	5	5	5	5	5							22.9355	22.6038	22.5962	22.0227	22.3715	22.3158	22.9355	22.6038	22.5962	22.0227	22.3715	22.3158	22.7207	22.2446	0.00852958	0.00842519	-0.476121	0.0169866	1.76989	0.0650741	1.18659
A0A0H3C5J0	A0A0H3C5J0_CAUVN			Putative polyketide cyclase-dehydrase/lipid transport protein	0.000348797	8	8	7	8	8	8	8							24.7783	24.5945	24.6998	25.0553	24.9971	25.0591	24.7783	24.5945	24.6998	25.0553	24.9971	25.0591	24.6928	25.0374	0.00373524	0.00138786	0.344588	0.00235915	2.62724	0.0182276	1.73927
A0A0H3C5J2	A0A0H3C5J2_CAUVN			NAD(+) diphosphatase	0.000348797	24	22	22	22	21	22	22							26.0526	26.0691	26.2322	26.2126	26.0923	26.142	26.0526	26.0691	26.2322	26.2126	26.0923	26.142	26.1203	26.1498	0.00380077	0.0023122	0.0295312	0.681399	0.166599	0.768861	0.114152
A0A0H3C5J3	A0A0H3C5J3_CAUVN			Tetracycline resistance protein	0.0010142	2	2	2	2	2	2	2							20.4694	21.0186	20.9442	21.3002	20.428	21.209	20.4694	21.0186	20.9442	21.3002	20.428	21.209	20.8304	21.0285	0.014317	0.0228511	0.198108	0.575293	0.240111	0.685315	0.16411
A0A0H3C5J4	A0A0H3C5J4_CAUVN			OAR protein	0.000348797	2	1	1	1	1	1	1							18.296	18.1512	17.4563	16.154	18.452	17.2125	18.296	18.1512	17.4563	16.154	18.452	17.2125	18.0116	17.5691	0.0249839	0.0665895	-0.442483	0.304106	0.516975	0.440203	0.356347
A0A0H3C5J6	A0A0H3C5J6_CAUVN			Hydroxymethylglutaryl-CoA lyase	0.000348797	12	11	11	10	9	11	11							25.7213	25.7375	25.6552	25.7301	25.6447	25.6521	25.7213	25.7375	25.6552	25.7301	25.6447	25.6521	25.7051	25.6762	0.00169611	0.00184165	-0.028899	0.606673	0.217045	0.710923	0.148178
A0A0H3C5J8	A0A0H3C5J8_CAUVN			Alpha/beta hydrolase family protein	0.000348797	16	15	15	14	15	14	15							27.1595	27.1251	27.1545	26.9802	26.9886	26.9969	27.1595	27.1251	27.1545	26.9802	26.9886	26.9969	27.1464	26.9886	0.000684278	0.000309816	-0.157825	0.013225	1.87861	0.05444	1.26408
A0A0H3C5J9	A0A0H3C5J9_CAUVN			Two-component receiver protein CpdR	0.000348797	8	8	8	6	6	6	5							27.4489	27.3791	27.4935	27.0921	27.0357	26.9707	27.4489	27.3791	27.4935	27.0921	27.0357	26.9707	27.4413	27.0337	0.00210129	0.00224788	-0.40754	0.000708856	3.14944	0.00996025	2.00173
A0A0H3C5K1	A0A0H3C5K1_CAUVN			Ubiquinol-cytochrome c reductase iron-sulfur subunit	0.000348797	21	21	20	20	18	20	21							29.3541	29.3624	29.6372	29.5978	29.6502	29.5598	29.3541	29.3624	29.6372	29.5978	29.6502	29.5598	29.4573	29.6031	0.00547038	0.00153329	0.145767	0.160071	0.795686	0.281646	0.550297
A0A0H3C5K2	A0A0H3C5K2_CAUVN			Pyrimidine 5'-nucleotidase family protein	0.000348797	11	11	10	11	11	11	11							25.4041	25.2662	25.417	25.7913	25.6898	25.7045	25.4041	25.2662	25.417	25.7913	25.6898	25.7045	25.364	25.7292	0.00329571	0.00213113	0.365211	0.00188502	2.72468	0.0161321	1.79231
A0A0H3C5K3	A0A0H3C5K3_CAUVN			2-dehydro-3-deoxygluconokinase	0.000348797	18	17	17	18	18	18	17							26.2292	26.1983	26.1942	26.3308	26.2695	26.2951	26.2292	26.1983	26.1942	26.3308	26.2695	26.2951	26.2073	26.2987	0.000730012	0.00117056	0.0913797	0.100032	0.999863	0.205017	0.68821
A0A0H3C5K4	A0A0H3C5K4_CAUVN			Chemotaxis motA protein	0.000348797	5	5	4	4	3	4	4							23.9209	22.6383	22.4731	21.5554	22.9876	23.4628	23.9209	22.6383	22.4731	21.5554	22.9876	23.4628	23.1659	22.8677	0.0344425	0.0438008	-0.298251	0.608716	0.215585	0.712764	0.147054
A0A0H3C5K6	A0A0H3C5K6_CAUVN			Carboxymethylenebutenolidase	0.000348797	8	7	7	7	8	8	8							24.8719	24.9314	24.8476	25.2506	25.3422	25.1862	24.8719	24.9314	24.8476	25.2506	25.3422	25.1862	24.8841	25.2611	0.00173263	0.00310278	0.376989	0.00123844	2.90713	0.0130815	1.88334
A0A0H3C5K7	A0A0H3C5K7_CAUVN			Autotransporter protein	0.000348797	64	64	64	63	62	62	63							30.1742	30.0481	30.0748	30.1206	29.9831	29.9922	30.1742	30.0481	30.0748	30.1206	29.9831	29.9922	30.1001	30.0333	0.00220884	0.00255931	-0.0667273	0.351395	0.454204	0.483263	0.315816
A0A0H3C5L0	A0A0H3C5L0_CAUVN			Two-component response regulator	0.000348797	3	3	3	2	2	3	3							21.3241	21.4896	21.128	21.3667	21.204	21.2352	21.3241	21.4896	21.128	21.3667	21.204	21.2352	21.3214	21.2703	0.00849325	0.00405952	-0.0510903	0.690923	0.16057	0.775076	0.110656
A0A0H3C5L2	A0A0H3C5L2_CAUVN			ABC transporter, ATP-binding protein cydD	0.000348797	6	6	6	6	5	5	5							22.677	22.7657	22.8598	22.3368	21.954	22.5509	22.677	22.7657	22.8598	22.3368	21.954	22.5509	22.7694	22.3012	0.0040159	0.0135721	-0.468216	0.026916	1.56999	0.087622	1.05739
A0A0H3C5L3	A0A0H3C5L3_CAUVN			Imidazolonepropionase-related amidohydrolase	0.000348797	18	5	4	6	5	3	3							22.9336	22.4371	23.1104	22.9746	18.8362	19.6857	22.9336	22.4371	23.1104	22.9746	18.8362	19.6857	22.8541	21.6026	0.0152908	0.106628	-1.25151	0.0826447	1.08279	0.181842	0.740305
A0A0H3C5L5	A0A0H3C5L5_CAUVN			Protein tyrosine phosphatase CtpA	0.000348797	6	5	5	5	6	6	6							22.1907	22.0088	22.3381	22.1138	22.7004	22.132	22.1907	22.0088	22.3381	22.1138	22.7004	22.132	22.1855	22.3421	0.00743675	0.0149481	0.15668	0.500933	0.30022	0.619198	0.20817
A0A0H3C5L6	A0A0H3C5L6_CAUVN			ASC-1 homology domain protein	0.000348797	11	10	10	10	9	10	10							25.2144	25.0148	25.1661	25.4873	25.2406	25.3359	25.2144	25.0148	25.1661	25.4873	25.2406	25.3359	25.1342	25.3582	0.00414384	0.004907	0.223952	0.0537547	1.26958	0.136007	0.866437
A0A0H3C5L8	A0A0H3C5L8_CAUVN			Peptidase, M14 family	0.000348797	37	36	36	35	37	34	34							28.0966	27.9857	28.0223	28.3989	28.2621	28.1959	28.0966	27.9857	28.0223	28.3989	28.2621	28.1959	28.0356	28.2881	0.00201526	0.00365958	0.252522	0.0155008	1.80965	0.0611331	1.21372
A0A0H3C5M1	A0A0H3C5M1_CAUVN			50S ribosomal protein L21	0.000348797	12	12	12	12	11	12	12							29.8849	29.8971	29.8896	30.1549	29.9074	29.9858	29.8849	29.8971	29.8896	30.1549	29.9074	29.9858	29.8905	30.0198	0.000204412	0.00421464	0.129207	0.153627	0.813533	0.274619	0.561269
A0A0H3C5M3	A0A0H3C5M3_CAUVN			Glutathione S-transferase	0.00332889	1	1	1	1	1	1	1							17.0451	17.7271	16.9084	17.0988	17.3442	17.5872	17.0451	17.7271	16.9084	17.0988	17.3442	17.5872	17.2733	17.3572	0.025459	0.0140816	0.0838872	0.661845	0.179243	0.753083	0.123157
A0A0H3C5M4	A0A0H3C5M4_CAUVN			FMN-binding nitroreductase family enzyme	0.000348797	12	12	11	11	9	9	9							24.0488	23.8409	23.8187	23.2936	23.3895	23.5725	24.0488	23.8409	23.8187	23.2936	23.3895	23.5725	23.9066	23.4232	0.00530917	0.00605052	-0.483368	0.00434121	2.36239	0.0263349	1.57947
A0A0H3C5M5	A0A0H3C5M5_CAUVN			GntR-family transcriptional regulator	0.000348797	8	8	8	8	8	8	8							25.2763	25.3072	25.1359	25.0645	25.2929	25.3285	25.2763	25.3072	25.1359	25.0645	25.2929	25.3285	25.2417	25.2333	0.00361729	0.00567632	-0.00841646	0.909915	0.0409991	0.939779	0.0269742
A0A0H3C5M7	A0A0H3C5M7_CAUVN			LytTr DNA-binding domain protein	0.000348797	12	9	11	12	9	10	11							24.7774	24.9125	25.166	24.9541	24.8822	24.9892	24.7774	24.9125	25.166	24.9541	24.8822	24.9892	24.9611	24.9425	0.00790701	0.00218757	-0.0185346	0.92989	0.0315684	0.952628	0.0210765
A0A0H3C5M8	A0A0H3C5M8_CAUVN			Histidine kinase	0.000348797	26	26	24	25	23	25	26							26.7529	26.6241	26.7773	26.958	26.8079	26.8965	26.7529	26.6241	26.7773	26.958	26.8079	26.8965	26.7197	26.8888	0.00308053	0.0028061	0.169077	0.0554147	1.25637	0.139159	0.85649
A0A0H3C5M9	A0A0H3C5M9_CAUVN			Integral membrane protein	0.000348797	10	9	10	8	9	7	8							24.9974	25.3047	25.0472	25.1907	24.9556	24.9313	24.9974	25.3047	25.0472	25.1907	24.9556	24.9313	25.1228	25.0307	0.00656648	0.00572314	-0.0921334	0.468208	0.329561	0.587902	0.230695
A0A0H3C5N1	A0A0H3C5N1_CAUVN	A0A0H3C5N1; A0A0H3C7N2; A0A0H3CCQ2	CCNA_00338;CCNA_01886;CCNA_03263	TonB-dependent receptor	0.000348797	38	38	38	38	30	24	27	1	1	1	1	1	1	28.5248	28.7502	28.4782	26.6231	26.2799	26.528	28.5248	28.7502	28.4782	26.6231	26.2799	26.528	28.5893	26.4841	0.0050886	0.00669253	-2.10522	5.60092e-06	5.25174	0.000940021	3.02686
A0A0H3C5N3	A0A0H3C5N3_CAUVN			MA superfamily peptidase	0.000348797	19	2	4	1	1	0	0							21.6004	21.938	16.6266	19.6037	NA	NA	21.6004	21.938	16.6266	19.6037	19.646	19.6534	21.2143	19.6345	0.148287	0.0013675	-1.57972	0.785729	0.104727	0.846408	0.0724203
A0A0H3C5N4	A0A0H3C5N4_CAUVN			Uncharacterized protein	0.000348797	5	4	5	5	5	5	5							23.4256	23.3794	23.1962	24.2412	24.2769	24.1304	23.4256	23.3794	23.1962	24.2412	24.2769	24.1304	23.3371	24.2175	0.0052002	0.00315476	0.880411	7.47574e-05	4.12635	0.00287793	2.54092
A0A0H3C5N5	A0A0H3C5N5_CAUVN			Conserved hypothetical cytosolic protein	0.000348797	9	8	8	7	8	8	8							23.6942	23.7232	23.2554	23.9046	23.7357	23.7341	23.6942	23.7232	23.2554	23.9046	23.7357	23.7341	23.5729	23.7937	0.0111263	0.0041182	0.220841	0.162625	0.788813	0.285302	0.544695
A0A0H3C5N6	A0A0H3C5N6_CAUVN			Tyrosine recombinase XerC	0.00692384	3	2	2	2	2	2	2							21.5457	21.5154	21.5422	21.7886	21.1491	21.4882	21.5457	21.5154	21.5422	21.7886	21.1491	21.4882	21.5345	21.4988	0.000769519	0.0148983	-0.0357611	0.732204	0.135368	0.806707	0.0932844
A0A0H3C5P0	A0A0H3C5P0_CAUVN			Uncharacterized protein	0.000348797	2	2	2	2	2	2	2							22.4558	22.6029	20.5585	21.9485	22.5839	21.5546	22.4558	22.6029	20.5585	21.9485	22.5839	21.5546	22.1192	22.0923	0.0521309	0.0235772	-0.0269233	0.810353	0.0913259	0.865295	0.062836
A0A0H3C5P1	A0A0H3C5P1_CAUVN			RDD domain-containing protein	0.000348797	2	2	2	2	2	2	2							20.896	20.865	20.7289	21.1141	21.1446	21.5614	20.896	20.865	20.7289	21.1141	21.1446	21.5614	20.8317	21.2882	0.00426677	0.0117459	0.456467	0.020967	1.67846	0.0747105	1.12662
A0A0H3C5P3	A0A0H3C5P3_CAUVN			17 kDa surface antigen	0.000348797	29	29	27	28	26	27	27							28.0685	27.9422	27.8213	27.8946	27.9817	27.8672	28.0685	27.9422	27.8213	27.8946	27.9817	27.8672	27.9475	27.9154	0.00442495	0.00214228	-0.0321663	0.727067	0.138426	0.802287	0.0956705
A0A0H3C5P5	A0A0H3C5P5_CAUVN			Uncharacterized protein	0.000348797	2	2	2	2	2	2	2							20.5793	20.6504	21.1927	20.0994	20.1316	20.4433	20.5793	20.6504	21.1927	20.0994	20.1316	20.4433	20.8345	20.2333	0.0161268	0.0093901	-0.601175	0.02774	1.55689	0.0889392	1.05091
A0A0H3C5P6	A0A0H3C5P6_CAUVN			Methyl-accepting chemotaxis protein	0.000348797	7	7	7	7	6	3	4							22.8438	22.3347	22.2411	21.4429	20.3196	21.104	22.8438	22.3347	22.2411	21.4429	20.3196	21.104	22.4984	21.0277	0.0144326	0.0274948	-1.4707	0.00473442	2.32473	0.0278262	1.55555
A0A0H3C5P8	A0A0H3C5P8_CAUVN			Deoxyhypusine synthase-like protein	0.000348797	36	32	31	31	32	30	30							28.4156	28.3412	28.4057	28.5508	28.594	28.7277	28.4156	28.3412	28.4057	28.5508	28.594	28.7277	28.3879	28.6262	0.00142254	0.00322265	0.238284	0.0132271	1.87854	0.05444	1.26408
A0A0H3C5P9	A0A0H3C5P9_CAUVN			DUF4440 domain-containing protein	0.000348797	2	2	2	2	2	2	2							23.4877	23.5265	23.7304	23.5719	23.4968	23.3761	23.4877	23.5265	23.7304	23.5719	23.4968	23.3761	23.5855	23.4838	0.00552892	0.00420866	-0.101643	0.320605	0.494029	0.455625	0.341392
A0A0H3C5Q0	A0A0H3C5Q0_CAUVN			Acetyl-CoA acetyltransferase	0.000348797	51	51	51	50	48	50	50							30.699	30.7233	30.5508	30.44	30.4629	30.3582	30.699	30.7233	30.5508	30.44	30.4629	30.3582	30.6597	30.4211	0.0030451	0.00180961	-0.2386	0.0155993	1.80689	0.0614414	1.21154
A0A0H3C5Q1	A0A0H3C5Q1_CAUVN			Bifunctional protein PutA	0.000348797	110	64	58	63	59	62	57							27.5485	27.4719	27.8244	27.6222	27.7709	27.5114	27.5485	27.4719	27.8244	27.6222	27.7709	27.5114	27.623	27.6388	0.00671498	0.00471162	0.0157481	0.874144	0.0584172	0.913136	0.0394647
A0A0H3C5Q3	A0A0H3C5Q3_CAUVN			Magnesium and cobalt efflux protein corC-like protein	0.000348797	13	12	10	11	10	11	11							25.6448	25.6256	25.6417	25.6162	25.8341	25.7546	25.6448	25.6256	25.6417	25.6162	25.8341	25.7546	25.6374	25.7377	0.00040291	0.00428485	0.100317	0.213974	0.669639	0.343838	0.463646
A0A0H3C5Q4	A0A0H3C5Q4_CAUVN			Cytochrome c oxidase polypeptide II	0.000348797	4	4	3	4	2	3	3							23.2272	22.7819	23.2734	21.8441	22.5137	22.2166	23.2272	22.7819	23.2734	21.8441	22.5137	22.2166	23.1105	22.2171	0.0117532	0.01512	-0.893368	0.00747292	2.12651	0.0378787	1.42161
A0A0H3C5Q6	A0A0H3C5Q6_CAUVN			DeoR-family transcriptional regulator	0.000348797	6	5	6	6	5	6	6							22.5435	22.6724	22.8459	22.6225	22.5957	22.7322	22.5435	22.6724	22.8459	22.6225	22.5957	22.7322	22.6926	22.6514	0.00669032	0.00319372	-0.0412562	0.706208	0.151067	0.786382	0.104366
A0A0H3C5Q7	A0A0H3C5Q7_CAUVN			Periplasmic multidrug efflux lipoprotein	0.000348797	36	26	29	28	29	31	31							27.3493	27.1897	27.1656	27.9425	28.2821	28.559	27.3493	27.1897	27.1656	27.9425	28.2821	28.559	27.2372	28.283	0.00366431	0.0109266	1.04578	0.00119235	2.9236	0.0127733	1.8937
A0A0H3C5Q8	A0A0H3C5Q8_CAUVN			ATP synthase protein I	0.000348797	3	3	3	3	3	3	3							23.5642	23.8539	23.9383	23.112	23.962	23.6895	23.5642	23.8539	23.9383	23.112	23.962	23.6895	23.7942	23.6296	0.00825033	0.0184	-0.164511	0.444145	0.352475	0.566862	0.246523
A0A0H3C5Q9	A0A0H3C5Q9_CAUVN			Nucleoside triphosphate pyrophosphatase	0.000348797	8	8	8	8	7	8	8							25.0918	25.0281	24.9736	25.1432	25.1277	25.1671	25.0918	25.0281	24.9736	25.1432	25.1277	25.1671	25.032	25.1461	0.0023632	0.000788176	0.114084	0.0760568	1.11886	0.171748	0.765108
A0A0H3C5R0	A0A0H3C5R0_CAUVN			Methyltransferase	0.000348797	11	10	10	9	9	11	8							24.2239	24.3695	23.7887	24.2595	24.22	24.1647	24.2239	24.3695	23.7887	24.2595	24.22	24.1647	24.1478	24.2153	0.0125248	0.00196606	0.0675154	0.600528	0.221466	0.705714	0.151371
A0A0H3C5R1	A0A0H3C5R1_CAUVN			Sulfotransferase family protein	0.000348797	11	11	9	9	9	8	9							24.852	24.4203	24.2217	24.8243	24.1279	24.1696	24.852	24.4203	24.2217	24.8243	24.1279	24.1696	24.5225	24.4107	0.0131544	0.016024	-0.111795	0.644449	0.190812	0.740822	0.130286
A0A0H3C5R2	A0A0H3C5R2_CAUVN			Conserved hypothetical cytosolic protein	0.000348797	4	4	3	3	3	3	3							21.9598	21.2805	22.8596	22.2389	21.8131	21.5383	21.9598	21.2805	22.8596	22.2389	21.8131	21.5383	22.1782	21.8926	0.0359517	0.0161469	-0.285583	0.708762	0.1495	0.786617	0.104237
A0A0H3C5R3	A0A0H3C5R3_CAUVN			Chaperone protein DnaJ	0.000348797	23	22	22	20	19	20	22							27.0728	27.0096	27.1238	27.0596	27.0578	27.2613	27.0728	27.0096	27.1238	27.0596	27.0578	27.2613	27.0695	27.1295	0.00211352	0.00431202	0.059987	0.486975	0.312493	0.608165	0.215978
A0A0H3C5R5	A0A0H3C5R5_CAUVN			Phosphohistidine phosphatase SixA	0.000348797	5	4	5	5	4	5	5							24.1813	24.2344	24.233	24.3566	24.3573	24.3639	24.1813	24.2344	24.233	24.3566	24.3573	24.3639	24.2164	24.3593	0.00124916	0.0001666	0.14286	0.0219736	1.6581	0.0770095	1.11346
A0A0H3C5R6	A0A0H3C5R6_CAUVN			Beta-D-glucoside glucohydrolase	0.000348797	27	23	21	22	23	20	25							25.9696	25.867	26.0582	26.1633	25.9599	26.0757	25.9696	25.867	26.0582	26.1633	25.9599	26.0757	25.9671	26.0687	0.00368505	0.00391561	0.101639	0.26317	0.579763	0.398715	0.399338
A0A0H3C5R8	A0A0H3C5R8_CAUVN			GTP 3',8-cyclase	0.000348797	13	11	12	10	11	10	12							23.2747	23.5667	23.1702	23.9965	23.8284	24.166	23.2747	23.5667	23.1702	23.9965	23.8284	24.166	23.3471	24.0035	0.00880609	0.0070344	0.656404	0.00401739	2.39606	0.0251795	1.59895
A0A0H3C5S0	A0A0H3C5S0_CAUVN			Gamma-glutamyltranspeptidase	0.000348797	37	35	37	35	31	34	34							27.6613	27.6601	27.5184	27.6453	27.6915	27.4951	27.6613	27.6601	27.5184	27.6453	27.6915	27.4951	27.6148	27.613	0.00297645	0.00371957	-0.00176392	0.974211	0.0113469	0.981685	0.00802784
A0A0H3C5S1	A0A0H3C5S1_CAUVN			Dihydroorotase	0.000348797	48	48	47	47	47	47	47							29.6598	29.6457	29.6707	29.7512	29.7402	29.6674	29.6598	29.6457	29.6707	29.7512	29.7402	29.6674	29.6588	29.72	0.000421574	0.00153173	0.0612537	0.260807	0.583681	0.396726	0.40151
A0A0H3C5S2	A0A0H3C5S2_CAUVN			Acyl-CoA dehydrogenase	0.000348797	4	3	2	3	3	3	2							20.4635	18.7949	19.4853	18.6516	19.3342	18.3178	20.4635	18.7949	19.4853	18.6516	19.3342	18.3178	19.7442	18.8315	0.0428175	0.0276058	-0.91263	0.152874	0.815666	0.27376	0.56263
A0A0H3C5S3	A0A0H3C5S3_CAUVN			Putative periplasmic protein	0.000348797	6	4	5	4	5	6	5							23.758	24.2159	23.992	24.3522	24.4449	24.214	23.758	24.2159	23.992	24.3522	24.4449	24.214	24.0007	24.3401	0.00954415	0.00477425	0.339425	0.0445223	1.35142	0.120091	0.92049
A0A0H3C5S4	A0A0H3C5S4_CAUVN			Uncharacterized protein	0.000348797	5	5	5	5	4	4	4							25.751	25.6612	25.6165	25.6895	25.6402	25.6867	25.751	25.6612	25.6165	25.6895	25.6402	25.6867	25.6773	25.6723	0.00266801	0.00107743	-0.00498781	0.94464	0.0247338	0.961184	0.0171933
A0A0H3C5S5	A0A0H3C5S5_CAUVN			GntR-family transcriptional regulator	0.000348797	8	1	0	0	6	8	7							21.6319	NA	NA	22.92	23.8512	23.4039	21.6319	19.67	20.6884	22.92	23.8512	23.4039	20.8761	23.4412	0.0474843	0.0199096	2.56513	0.00306936	2.51295	0.0213653	1.67029
A0A0H3C5S6	A0A0H3C5S6_CAUVN			Acetolactate synthase	0.000348797	21	21	21	21	19	20	20							27.1834	27.1043	27.0463	27.0388	26.91	26.9764	27.1834	27.1043	27.0463	27.0388	26.91	26.9764	27.1125	26.976	0.00253844	0.00238729	-0.136445	0.0786876	1.10409	0.176048	0.75437
A0A0H3C5S7	A0A0H3C5S7_CAUVN			TonB-dependent receptor	0.000348797	68	67	68	68	60	58	65							31.3075	31.3683	31.6535	30.1046	29.9824	30.9815	31.3075	31.3683	31.6535	30.1046	29.9824	30.9815	31.4511	30.4285	0.00587451	0.0179544	-1.02259	0.011087	1.95519	0.04828	1.31623
A0A0H3C5S8	A0A0H3C5S8_CAUVN			AIM24 family protein	0.000348797	29	27	26	28	27	27	29							28.5656	28.4879	28.3786	28.7272	28.9536	29.0016	28.5656	28.4879	28.3786	28.7272	28.9536	29.0016	28.4794	28.899	0.00329808	0.00507203	0.419574	0.00612738	2.21273	0.0331735	1.47921
A0A0H3C5T2	A0A0H3C5T2_CAUVN			tRNA pseudouridine synthase B	0.000348797	18	16	15	17	16	18	16							26.0251	25.9602	25.9934	26.3534	26.1579	26.2408	26.0251	25.9602	25.9934	26.3534	26.1579	26.2408	25.9931	26.2529	0.00124988	0.00373769	0.259812	0.00990604	2.0041	0.0450017	1.34677
A0A0H3C5T3	A0A0H3C5T3_CAUVN			Sulfite reductase, beta subunit	0.000348797	48	45	48	47	46	48	48							29.1947	29.2965	29.3145	29.4608	29.3238	29.4983	29.1947	29.2965	29.3145	29.4608	29.3238	29.4983	29.2695	29.4296	0.00220842	0.00312142	0.160022	0.0678538	1.16843	0.158413	0.800209
A0A0H3C5T4	A0A0H3C5T4_CAUVN			Acetyltransferase	0.000348797	6	5	5	6	5	4	5							21.9451	22.0797	22.6505	22.6924	22.597	23.0441	21.9451	22.0797	22.6505	22.6924	22.597	23.0441	22.2587	22.791	0.0168496	0.0103381	0.532286	0.0520269	1.28377	0.133198	0.875503
A0A0H3C5T5	A0A0H3C5T5_CAUVN			Uncharacterized protein	0.000348797	9	9	9	9	9	9	9							28.0528	27.9815	27.9803	28.0214	28.1404	27.8295	28.0528	27.9815	27.9803	28.0214	28.1404	27.8295	28.0053	28.0027	0.00148317	0.00560277	-0.00256091	0.934716	0.0293203	0.954947	0.0200209
A0A0H3C5T6	A0A0H3C5T6_CAUVN			ATP-dependent RNA helicase	0.000348797	28	26	24	26	24	24	26							26.8128	26.7064	26.9183	26.9464	26.8187	26.9986	26.8128	26.7064	26.9183	26.9464	26.8187	26.9986	26.8151	26.9232	0.00395094	0.0034364	0.108112	0.235476	0.628054	0.368015	0.434135
A0A0H3C5T7	A0A0H3C5T7_CAUVN			Glutathione S-transferase	0.000348797	4	4	4	4	4	4	3							23.9987	24.0198	24.3356	24.1877	24.3789	24.2337	23.9987	24.0198	24.3356	24.1877	24.3789	24.2337	24.1265	24.2691	0.00782566	0.00411143	0.142631	0.244067	0.612491	0.377922	0.422598
A0A0H3C5T8	A0A0H3C5T8_CAUVN			Translation initiation factor IF-2	0.000348797	114	106	105	105	108	107	105							31.133	31.1313	31.1923	31.4843	31.3264	31.3973	31.133	31.1313	31.1923	31.4843	31.3264	31.3973	31.1525	31.4041	0.00111526	0.00251993	0.251622	0.00739058	2.13132	0.0376508	1.42423
A0A0H3C5T9	A0A0H3C5T9_CAUVN			CoA pyrophosphatase	0.000348797	5	5	5	5	5	5	5							22.8622	22.8204	22.8562	22.7327	23.0316	23.0647	22.8622	22.8204	22.8562	22.7327	23.0316	23.0647	22.8464	22.9505	0.000989051	0.0079716	0.104155	0.377113	0.423529	0.509565	0.2928
A0A0H3C5U2	A0A0H3C5U2_CAUVN			Methionine adenosyltransferase	0.000348797	61	60	61	58	60	59	58							31.6608	31.63	31.6889	31.8247	31.7046	31.8867	31.6608	31.63	31.6889	31.8247	31.7046	31.8867	31.6601	31.8073	0.000930902	0.00291197	0.147184	0.0685111	1.16424	0.159577	0.797029
A0A0H3C5U3	A0A0H3C5U3_CAUVN			Uncharacterized protein	0.000348797	13	12	13	13	13	13	12							25.8221	25.9047	25.6456	25.1614	25.3255	25.3469	25.8221	25.9047	25.6456	25.1614	25.3255	25.3469	25.7948	25.2803	0.0051332	0.00401469	-0.514547	0.00203628	2.69116	0.0169465	1.77092
A0A0H3C5U5	A0A0H3C5U5_CAUVN			Lumazine-binding domain protein	0.000348797	14	13	13	14	13	14	13							27.0428	26.8664	27.13	26.9537	26.4893	26.8718	27.0428	26.8664	27.13	26.9537	26.4893	26.8718	27.0172	26.7853	0.00497183	0.00926029	-0.231839	0.154025	0.812407	0.274831	0.560935
A0A0H3C5U7	A0A0H3C5U7_CAUVN			tRNA-2-methylthio-N(6)-dimethylallyladenosine synthase	0.000348797	23	22	23	22	22	22	22							26.3064	26.2037	25.8955	26.4826	26.3002	26.4293	26.3064	26.2037	25.8955	26.4826	26.3002	26.4293	26.1455	26.406	0.00818192	0.00355204	0.260496	0.0764035	1.11689	0.172379	0.763517
A0A0H3C5U8	A0A0H3C5U8_CAUVN			4-hydroxy-3-methylbut-2-en-1-yl diphosphate synthase (flavodoxin)	0.000348797	24	22	23	21	22	23	22							27.4631	27.4491	27.4856	27.8148	27.7359	27.7731	27.4631	27.4491	27.4856	27.8148	27.7359	27.7731	27.466	27.7749	0.000671026	0.00142192	0.308927	0.000944007	3.02502	0.011244	1.94908
A0A0H3C5U9	A0A0H3C5U9_CAUVN			RDD family membrane protein	0.000348797	6	6	6	6	6	6	6							23.8523	23.8949	23.8546	23.9126	23.951	24.0248	23.8523	23.8949	23.8546	23.9126	23.951	24.0248	23.8674	23.9636	0.00100509	0.00238077	0.0961772	0.122858	0.910598	0.237007	0.625239
A0A0H3C5V0	A0A0H3C5V0_CAUVN			Alpha-1,2-mannosidase	0.000348797	22	21	20	20	20	20	22							25.8925	25.8006	25.9301	26.037	25.9448	26.1249	25.8925	25.8006	25.9301	26.037	25.9448	26.1249	25.8754	26.0374	0.00257571	0.00345959	0.162001	0.0649476	1.18744	0.15425	0.811774
A0A0H3C5V1	A0A0H3C5V1_CAUVN			Mitochondrial-type Fe-S cluster assembly protein NFU	0.000348797	15	13	14	14	14	14	15							27.4978	27.4993	27.6066	28.0285	27.9827	27.8596	27.4978	27.4993	27.6066	28.0285	27.9827	27.8596	27.5355	27.9587	0.00226725	0.00312477	0.423218	0.00116296	2.93444	0.0125339	1.90191
A0A0H3C5V2	A0A0H3C5V2_CAUVN			TonB-dependent receptor	0.000348797	51	2	4	3	3	3	2							18.603	21.5639	19.7742	19.7068	20.4527	18.1337	18.603	21.5639	19.7742	19.7068	20.4527	18.1337	20.4825	19.7131	0.0746332	0.0609263	-0.769373	0.583702	0.233809	0.693133	0.159184
A0A0H3C5V3	A0A0H3C5V3_CAUVN			Peptide chain release factor 1	0.000348797	31	30	29	28	27	28	28							27.222	27.1609	27.1367	27.4383	27.2161	27.2989	27.222	27.1609	27.1367	27.4383	27.2161	27.2989	27.1737	27.3207	0.00161735	0.00411062	0.147029	0.100843	0.996352	0.205843	0.686463
A0A0H3C5V4	A0A0H3C5V4_CAUVN			S-adenosylmethionine-dependent methyltransferase	0.000348797	15	15	13	14	14	12	13							26.9697	27.1763	27.2541	27.5072	27.1392	27.4154	26.9697	27.1763	27.2541	27.5072	27.1392	27.4154	27.1383	27.3622	0.00541744	0.00700319	0.223925	0.137819	0.86069	0.254183	0.594853
A0A0H3C5V5	A0A0H3C5V5_CAUVN			Phosphohydrolase, MutT-nudix family	0.000348797	5	4	5	5	5	5	5							22.6767	23.0075	23.4163	23.2428	23.2231	23.2443	22.6767	23.0075	23.4163	23.2428	23.2231	23.2443	23.0653	23.2368	0.016084	0.000509475	0.171453	0.326008	0.486772	0.459575	0.337644
A0A0H3C5V6	A0A0H3C5V6_CAUVN			Acetylornithine aminotransferase	0.000348797	32	11	11	15	6	5	6							23.5489	23.2497	24.5399	23.1727	22.3683	23.2955	23.5489	23.2497	24.5399	23.1727	22.3683	23.2955	23.89	23	0.0283988	0.0219485	-0.89002	0.0986751	1.00579	0.202879	0.692762
A0A0H3C5V7	A0A0H3C5V7_CAUVN			Inositol ABC transport system, permease protein IatP	0.000348797	4	1	1	0	0	0	0							17.704	17.843	NA	NA	NA	NA	17.704	17.843	18.9921	20.4031	18.5298	20.2653	18.3027	19.9437	0.0388887	0.0529088	1.641	0.0517295	1.28626	0.132815	0.876752
A0A0H3C5V8	A0A0H3C5V8_CAUVN			Uroporphyrinogen-III synthase	0.000348797	6	6	6	6	5	6	5							23.3418	23.3383	23.3649	22.8679	23.0554	22.753	23.3418	23.3383	23.3649	22.8679	23.0554	22.753	23.3484	22.8975	0.000619023	0.0066691	-0.450843	0.00259627	2.58565	0.0191199	1.71851
A0A0H3C5V9	A0A0H3C5V9_CAUVN			Uncharacterized protein	0.000348797	4	4	3	4	4	4	4							23.2519	23.1346	23.2663	23.622	23.6738	23.4497	23.2519	23.1346	23.2663	23.622	23.6738	23.4497	23.2188	23.585	0.00311188	0.00497645	0.366198	0.00504789	2.29689	0.0286659	1.54264
A0A0H3C5W1	A0A0H3C5W1_CAUVN			Two-component receiver domain protein	0.000348797	7	6	6	5	5	5	5							24.5857	24.4089	24.3333	24.0582	24.0576	24.1846	24.5857	24.4089	24.3333	24.0582	24.0576	24.1846	24.4466	24.1013	0.00529898	0.00303576	-0.345208	0.00842339	2.07451	0.04111	1.38605
A0A0H3C5W3	A0A0H3C5W3_CAUVN			Uncharacterized protein	0.000348797	15	15	15	15	14	14	15							25.2849	25.173	25.3514	24.9927	25.1334	25.1484	25.2849	25.173	25.3514	24.9927	25.1334	25.1484	25.2716	25.0932	0.00356634	0.00342383	-0.178477	0.05889	1.22996	0.145825	0.836168
A0A0H3C5W4	A0A0H3C5W4_CAUVN			Uncharacterized protein	0.000348797	2	2	2	2	2	2	2							22.6037	22.4846	22.3807	21.4106	21.6978	21.821	22.6037	22.4846	22.3807	21.4106	21.6978	21.821	22.4926	21.6532	0.00496307	0.00972987	-0.839363	0.000771438	3.1127	0.0105058	1.97857
A0A0H3C5W5	A0A0H3C5W5_CAUVN	A0A0H3C5W5; A0A0H3C8V0	CCNA_00438;CCNA_01186	Uncharacterized protein	0.0010142	15	11	11	11	10	9	9	10	10	10	9	8	9	25.8636	25.8923	25.8064	25.5885	25.6572	25.2195	25.8636	25.8923	25.8064	25.5885	25.6572	25.2195	25.8545	25.5008	0.00169265	0.00923482	-0.353751	0.0304077	1.51702	0.094845	1.02299
A0A0H3C5W7	A0A0H3C5W7_CAUVN			Fructokinase SucC	0.00366057	3	2	3	3	2	2	2							19.0377	20.6345	20.4591	19.8655	20.1485	19.661	19.0377	20.6345	20.4591	19.8655	20.1485	19.661	20.1976	19.9056	0.0436879	0.0123076	-0.292011	0.749067	0.125479	0.816354	0.0881216
A0A0H3C5W8	A0A0H3C5W8_CAUVN			Acetyltransferase	0.000348797	9	9	8	9	8	9	9							25.4849	25.4173	25.3681	25.3604	25.3451	25.2277	25.4849	25.4173	25.3681	25.3604	25.3451	25.2277	25.4243	25.3122	0.00230722	0.00286836	-0.112023	0.128419	0.891369	0.243385	0.613707
A0A0H3C5W9	A0A0H3C5W9_CAUVN			Uncharacterized protein	0.0010142	1	1	1	1	1	1	1							19.8462	17.3677	19.226	19.7639	20.4614	18.9071	19.8462	17.3677	19.226	19.7639	20.4614	18.9071	19.1331	19.8452	0.0685543	0.0394947	0.712101	0.279181	0.554115	0.414449	0.382528
A0A0H3C5X0	A0A0H3C5X0_CAUVN			Chemotaxis protein cheW	0.000348797	10	9	10	10	7	8	8							25.0918	25.2132	25.0979	24.4048	24.6397	24.6606	25.0918	25.2132	25.0979	24.4048	24.6397	24.6606	25.1354	24.5729	0.00272321	0.00577987	-0.562454	0.00102601	2.98885	0.0114799	1.94006
A0A0H3C5X1	A0A0H3C5X1_CAUVN			CHASE2 membrane receptor	0.000348797	15	15	14	15	12	14	14							25.2503	25.1904	25.4001	24.5527	25.4139	25.248	25.2503	25.1904	25.4001	24.5527	25.4139	25.248	25.283	25.1169	0.00427338	0.0182261	-0.166034	0.414381	0.3826	0.54052	0.267188
A0A0H3C5X2	A0A0H3C5X2_CAUVN			Single domain receiver protein CleA	0.000348797	11	9	8	9	8	9	9							24.7026	24.7403	24.7377	24.6753	24.64	24.7792	24.7026	24.7403	24.7377	24.6753	24.64	24.7792	24.727	24.6994	0.000849903	0.00293089	-0.0275778	0.63163	0.199538	0.73003	0.136659
A0A0H3C5X4	A0A0H3C5X4_CAUVN			PerM-family permease	0.000348797	5	4	5	5	5	4	4							23.5362	24.3785	24.1678	23.9153	24.2925	23.2072	23.5362	24.3785	24.1678	23.9153	24.2925	23.2072	24.0697	23.8718	0.0182435	0.0231465	-0.197823	0.551976	0.25808	0.663557	0.178121
A0A0H3C5X5	A0A0H3C5X5_CAUVN	A0A0H3C5S5; A0A0H3C5X5	CCNA_00454;CCNA_00570	GntR-family transcriptional regulator	0.000348797	25	11	11	12	24	24	25	2	1	2	3	3	3	24.2545	24.1707	24.3116	28.0674	28.0556	28.0904	24.2545	24.1707	24.3116	28.0674	28.0556	28.0904	24.2468	28.0712	0.00292318	0.000629927	3.82445	3.33247e-09	8.47723	1.00674e-05	4.99708
A0A0H3C5X8	A0A0H3C5X8_CAUVN			Na(+)/H(+) antiporter NhaA	0.000348797	4	4	4	4	3	4	4							22.6777	22.6581	22.8145	22.5463	23.51	23.2726	22.6777	22.6581	22.8145	22.5463	23.51	23.2726	22.7184	23.1644	0.00375193	0.0217259	0.445998	0.180229	0.744175	0.3064	0.513712
A0A0H3C5X9	A0A0H3C5X9_CAUVN			Short chain dehydrogenase	0.000348797	8	8	8	8	3	5	5							22.9614	22.8743	22.6367	20.4955	21.5444	21.0008	22.9614	22.8743	22.6367	20.4955	21.5444	21.0008	22.8305	21.0767	0.00736364	0.0249627	-1.75382	0.000887873	3.05165	0.0109982	1.95868
A0A0H3C5Y0	A0A0H3C5Y0_CAUVN			Membrane alanine aminopeptidase	0.000348797	66	45	42	41	38	34	35							27.0553	26.7877	26.8935	26.8608	26.5081	26.6935	27.0553	26.7877	26.8935	26.8608	26.5081	26.6935	26.9164	26.6946	0.00500874	0.00661184	-0.221755	0.110129	0.9581	0.219893	0.657788
A0A0H3C5Y1	A0A0H3C5Y1_CAUVN			Nitrate binding protein nrtA	0.000348797	15	14	15	15	8	8	11							25.485	25.9631	26.9694	23.9639	23.6738	23.9411	25.485	25.9631	26.9694	23.9639	23.6738	23.9411	26.276	23.8654	0.0289868	0.0067613	-2.4106	0.00147715	2.83057	0.0142057	1.84754
A0A0H3C5Y2	A0A0H3C5Y2_CAUVN			Oligosaccharide translocase/flippase	0.000348797	4	3	4	4	4	4	4							22.6182	22.8094	22.5951	22.7726	23.2247	23.2838	22.6182	22.8094	22.5951	22.7726	23.2247	23.2838	22.6775	23.1111	0.00518769	0.0121094	0.433631	0.0398349	1.39974	0.111102	0.954276
A0A0H3C5Y3	A0A0H3C5Y3_CAUVN			MarR/EmrR family transcriptional regulator	0.000348797	8	7	8	7	7	7	7							22.9441	22.9928	22.9424	23.0478	23.0761	23.1941	22.9441	22.9928	22.9424	23.0478	23.0761	23.1941	22.96	23.1074	0.00124715	0.00335871	0.147429	0.0519988	1.28401	0.133198	0.875503
A0A0H3C5Y5	A0A0H3C5Y5_CAUVN			GDP-mannose 4,6-dehydratase	0.000348797	21	21	20	19	20	19	20							28.1631	28.151	28.3115	28.3338	28.3439	28.2819	28.1631	28.151	28.3115	28.3338	28.3439	28.2819	28.2104	28.3201	0.0031671	0.00117497	0.109721	0.135093	0.869367	0.251148	0.60007
A0A0H3C5Y7	A0A0H3C5Y7_CAUVN			Riboflavin biosynthesis protein RibD	0.000348797	33	33	32	31	31	32	32							29.1874	29.1738	29.0189	29.1829	29.2555	29.1729	29.1874	29.1738	29.0189	29.1829	29.2555	29.1729	29.1287	29.2043	0.00321338	0.00154341	0.0756005	0.295718	0.529122	0.431786	0.364732
A0A0H3C5Y8	A0A0H3C5Y8_CAUVN			Excisionase	0.000348797	2	2	2	2	2	2	2							21.0998	21.6746	21.7223	22.1344	21.8468	21.7839	21.0998	21.6746	21.7223	22.1344	21.8468	21.7839	21.5252	21.9299	0.016115	0.00852294	0.404694	0.0829799	1.08103	0.18205	0.73981
A0A0H3C5Y9	A0A0H3C5Y9_CAUVN			Two-component sensor histidine kinase	0.000348797	6	6	6	5	4	5	5							22.9185	23.2283	23.034	22.8563	23.0538	22.8429	22.9185	23.2283	23.034	22.8563	23.0538	22.8429	23.066	22.921	0.0067903	0.00515126	-0.14503	0.231736	0.635007	0.364242	0.438609
A0A0H3C5Z1	A0A0H3C5Z1_CAUVN			Toxin protein module HipA	0.000348797	9	9	8	9	9	7	8							23.9126	23.4351	23.8918	24.2596	23.5644	24.0652	23.9126	23.4351	23.8918	24.2596	23.5644	24.0652	23.7627	23.9917	0.0113648	0.0149681	0.229024	0.378928	0.421444	0.511501	0.291153
A0A0H3C5Z2	A0A0H3C5Z2_CAUVN			Transposase	0.000348797	3	2	1	2	1	2	1							19.6464	18.4974	20.3251	17.7262	19.0875	18.7952	19.6464	18.4974	20.3251	17.7262	19.0875	18.7952	19.671	18.6439	0.0474021	0.0386623	-1.02713	0.156603	0.8052	0.277803	0.556264
A0A0H3C5Z3	A0A0H3C5Z3_CAUVN			Uncharacterized protein	0.000348797	6	6	6	6	6	6	6							25.4594	25.6557	25.5332	25.7853	25.5187	25.4721	25.4594	25.6557	25.5332	25.7853	25.5187	25.4721	25.5517	25.5988	0.0038811	0.00660333	0.0470935	0.702424	0.153401	0.783613	0.105899
A0A0H3C5Z4	A0A0H3C5Z4_CAUVN			YjgP/YjgQ family membrane permease	0.000348797	10	9	8	10	7	9	9							25.3376	25.4243	25.484	25.5708	25.5658	25.7092	25.3376	25.4243	25.484	25.5708	25.5658	25.7092	25.4166	25.6168	0.00289569	0.00317639	0.200231	0.0305943	1.51436	0.09499	1.02232
A0A0H3C5Z5	A0A0H3C5Z5_CAUVN			Alkaline phosphatase	0.000348797	8	7	6	5	7	8	5							21.5308	21.9219	20.9546	21.6842	22.8072	21.4685	21.5308	21.9219	20.9546	21.6842	22.8072	21.4685	21.5222	22.1133	0.0226647	0.0326911	0.59109	0.280242	0.552466	0.414925	0.382031
A0A0H3C5Z6	A0A0H3C5Z6_CAUVN			DUF4440 domain-containing protein	0.000348797	9	9	8	8	8	8	8							26.6594	26.5279	26.5217	26.3043	26.0699	26.1573	26.6594	26.5279	26.5217	26.3043	26.0699	26.1573	26.5711	26.1804	0.00292723	0.00452601	-0.390666	0.00395385	2.40298	0.0249631	1.6027
A0A0H3C5Z7	A0A0H3C5Z7_CAUVN			Thioredoxin	0.000348797	26	26	26	26	24	26	26							27.6119	27.5296	27.5293	27.7791	27.8731	27.7907	27.6119	27.5296	27.5293	27.7791	27.8731	27.7907	27.5575	27.8149	0.00172781	0.00184368	0.257445	0.00430873	2.36565	0.0263066	1.57994
A0A0H3C5Z8	A0A0H3C5Z8_CAUVN			Response regulator receiver domain protein	0.000348797	2	2	2	2	2	2	2							21.2276	21.954	21.7168	21.2487	21.1031	21.4474	21.2276	21.954	21.7168	21.2487	21.1031	21.4474	21.6635	21.2733	0.0171232	0.00812741	-0.390137	0.131789	0.88012	0.247135	0.607065
A0A0H3C5Z9	A0A0H3C5Z9_CAUVN			Transport protein	0.000348797	7	7	7	7	7	7	7							24.4108	24.3846	24.3507	24.5542	24.4593	24.5566	24.4108	24.3846	24.3507	24.5542	24.4593	24.5566	24.3822	24.5241	0.00123608	0.00226355	0.14182	0.0402432	1.39531	0.111741	0.951786
A0A0H3C600	A0A0H3C600_CAUVN			Sphingosine kinase/diacylglycerol kinase-related protein	0.000348797	14	13	11	11	12	13	12							25.6862	25.5795	25.6587	25.6562	25.6961	25.737	25.6862	25.5795	25.6587	25.6562	25.6961	25.737	25.6422	25.6968	0.00215948	0.00157189	0.0546532	0.354614	0.450244	0.486066	0.313305
A0A0H3C601	A0A0H3C601_CAUVN			MarR-family transcriptional regulator	0.000348797	5	4	4	5	4	5	5							23.1845	23.045	23.4371	22.9948	23.0407	23.0926	23.1845	23.045	23.4371	22.9948	23.0407	23.0926	23.2314	23.0432	0.00855906	0.00212536	-0.188139	0.158544	0.799849	0.280423	0.552186
A0A0H3C602	A0A0H3C602_CAUVN			Glucosyltransferase	0.000348797	8	5	6	7	5	7	6							23.5486	23.7167	24.0036	23.4526	23.7692	23.6888	23.5486	23.7167	24.0036	23.4526	23.7692	23.6888	23.7686	23.643	0.00968446	0.00696158	-0.125596	0.448781	0.347965	0.572054	0.242563
A0A0H3C603	A0A0H3C603_CAUVN			ABC-type polysaccharide/polyol phosphate export system, permease component	0.000348797	4	4	4	4	4	4	4							22.9923	23.1206	23.3091	23.2211	23.449	23.3175	22.9923	23.1206	23.3091	23.2211	23.449	23.3175	23.1466	23.3322	0.00688526	0.0049025	0.185672	0.130565	0.884174	0.245487	0.609971
A0A0H3C604	A0A0H3C604_CAUVN			MarR/EmrR-family transcriptional regulator	0.0010142	2	1	1	1	2	2	2							20.0661	20.1768	19.5899	20.8218	21.0141	21.1862	20.0661	20.1768	19.5899	20.8218	21.0141	21.1862	19.9658	21.015	0.0156349	0.00867858	1.04917	0.001635	2.78648	0.0147884	1.83008
A0A0H3C605	A0A0H3C605_CAUVN			Acyl-CoA synthetase	0.000348797	35	33	31	31	32	31	31							27.3529	27.2415	27.3789	27.629	27.5657	27.6401	27.3529	27.2415	27.3789	27.629	27.5657	27.6401	27.3257	27.612	0.00267094	0.00145351	0.286314	0.00371774	2.42972	0.0240679	1.61856
A0A0H3C606	A0A0H3C606_CAUVN			Flagellar hook length determination protein	0.000348797	7	6	7	7	6	7	6							22.7543	22.537	22.4557	22.1197	21.925	22.1428	22.7543	22.537	22.4557	22.1197	21.925	22.1428	22.5879	22.0658	0.00683594	0.00542302	-0.522184	0.00347796	2.45868	0.0232454	1.63366
A0A0H3C607	A0A0H3C607_CAUVN			Cytochrome b	0.000348797	17	14	17	14	15	16	17							27.8056	27.9366	27.9211	27.7795	27.9758	28.1312	27.8056	27.9366	27.9211	27.7795	27.9758	28.1312	27.889	27.9693	0.00256568	0.00630212	0.0803287	0.50123	0.299963	0.619311	0.208091
A0A0H3C608	A0A0H3C608_CAUVN			Putative acetyltransferase	0.000348797	9	9	7	9	9	8	8							25.7309	25.7326	25.8578	26.04	26.0868	25.9543	25.7309	25.7326	25.8578	26.04	26.0868	25.9543	25.775	26.0281	0.00282466	0.00258025	0.25307	0.00962216	2.01673	0.0439766	1.35678
A0A0H3C609	A0A0H3C609_CAUVN			PSK-family transcription factor	0.000348797	3	3	3	2	3	3	3							23.0465	22.6978	22.155	23.1589	23.3161	23.2374	23.0465	22.6978	22.155	23.1589	23.3161	23.2374	22.6784	23.2389	0.0198491	0.0033825	0.560501	0.0428175	1.36838	0.116586	0.933354
A0A0H3C611	A0A0H3C611_CAUVN			Carboxymethylenebutenolidase	0.000348797	17	17	17	16	16	16	17							26.9801	26.9419	26.7218	27.1674	27.2145	27.1952	26.9801	26.9419	26.7218	27.1674	27.2145	27.1952	26.8857	27.1925	0.00518546	0.000872123	0.306794	0.0107785	1.96744	0.0475915	1.32247
A0A0H3C612	A0A0H3C612_CAUVN			Pyrazinamidase/nicotinamidase	0.000348797	6	5	4	5	4	6	4							22.9713	22.8514	22.8824	22.6581	22.9576	22.8616	22.9713	22.8514	22.8824	22.6581	22.9576	22.8616	22.9026	22.8311	0.00271762	0.00670019	-0.0715381	0.444105	0.352514	0.566862	0.246523
A0A0H3C615	A0A0H3C615_CAUVN			Uncharacterized protein	0.000348797	8	8	8	8	8	8	8							26.202	26.4374	26.4556	26.7084	26.6338	26.3206	26.202	26.4374	26.4556	26.7084	26.6338	26.3206	26.3695	26.5638	0.00536424	0.00774818	0.194263	0.202602	0.693355	0.331123	0.480011
A0A0H3C616	A0A0H3C616_CAUVN			Metal-dependent hydrolase	0.00786112	1	1	1	1	1	1	1							21.3171	21.4025	21.0986	21.8932	21.7186	21.7544	21.3171	21.4025	21.0986	21.8932	21.7186	21.7544	21.2783	21.7907	0.00736775	0.00423188	0.512419	0.00273975	2.56229	0.0197537	1.70435
A0A0H3C617	A0A0H3C617_CAUVN			AAA-family response regulator flbD	0.000348797	26	25	25	25	24	24	24							26.5501	26.509	26.5545	26.7471	26.5907	26.682	26.5501	26.509	26.5545	26.7471	26.5907	26.682	26.538	26.6747	0.000944436	0.0029445	0.136669	0.0656358	1.18286	0.155275	0.808899
A0A0H3C618	A0A0H3C618_CAUVN			BMFP membrane fusogenic protein	0.000348797	10	10	9	9	9	10	10							25.6585	25.3171	25.0196	25.5167	25.7948	25.8937	25.6585	25.3171	25.0196	25.5167	25.7948	25.8937	25.3554	25.7437	0.0126204	0.00759591	0.388365	0.0830488	1.08067	0.182069	0.739765
A0A0H3C619	A0A0H3C619_CAUVN			Uncharacterized protein	0.00332889	1	1	1	1	1	1	1							18.9432	18.9829	19.4524	19.4914	19.2627	19.6584	18.9432	18.9829	19.4524	19.4914	19.2627	19.6584	19.1453	19.4799	0.0148079	0.0102038	0.334567	0.103507	0.98503	0.210003	0.677774
A0A0H3C620	A0A0H3C620_CAUVN			Ketoacyl reductase hetN	0.000348797	11	11	11	11	11	11	11							25.7212	25.7035	25.6615	25.6411	25.5369	25.5742	25.7212	25.7035	25.6615	25.6411	25.5369	25.5742	25.6956	25.5847	0.00119405	0.00206413	-0.110925	0.0812626	1.09011	0.179981	0.744773
A0A0H3C621	A0A0H3C621_CAUVN			Histidine kinase	0.000348797	14	13	14	14	12	12	14							24.6658	24.7706	24.7593	24.7905	24.5226	24.8819	24.6658	24.7706	24.7593	24.7905	24.5226	24.8819	24.7327	24.7396	0.00232559	0.00755219	0.0068953	0.998212	0.000777157	0.998543	0.000633374
A0A0H3C623	A0A0H3C623_CAUVN			Uncharacterized protein	0.00421496	1	0	0	1	0	0	0							NA	NA	18.7276	NA	NA	NA	18.5605	19.5549	18.7276	18.3749	19.8716	18.1714	19.0164	19.0197	0.028104	0.0493711	0.00324622	0.799655	0.0970971	0.85754	0.0667454
A0A0H3C624	A0A0H3C624_CAUVN			Heat shock protein 15	0.000348797	4	4	4	4	2	3	4							22.3054	22.1196	22.1206	21.3455	21.9422	22.1586	22.3054	22.1196	22.1206	21.3455	21.9422	22.1586	22.1846	21.8545	0.00482216	0.0193026	-0.330062	0.150681	0.821941	0.270863	0.56725
A0A0H3C625	A0A0H3C625_CAUVN			TonB-dependent receptor	0.000348797	33	33	32	31	29	29	32							27.0976	27.0672	27.1988	26.7264	26.5697	27.4457	27.0976	27.0672	27.1988	26.7264	26.5697	27.4457	27.1223	26.9666	0.00254056	0.0173561	-0.155748	0.419692	0.37707	0.54486	0.263715
A0A0H3C628	A0A0H3C628_CAUVN			TetR-family transcriptional regulator	0.000348797	13	13	13	12	12	12	12							25.662	25.6957	25.632	25.5254	25.6684	25.6274	25.662	25.6957	25.632	25.5254	25.6684	25.6274	25.6635	25.6083	0.00124157	0.00287682	-0.0551769	0.374905	0.426078	0.50766	0.294427
A0A0H3C629	A0A0H3C629_CAUVN			Acetoacetyl-CoA reductase	0.000348797	26	25	25	26	24	25	24							29.5579	29.5915	29.5223	28.7245	28.6916	28.6472	29.5579	29.5915	29.5223	28.7245	28.6916	28.6472	29.5575	28.6881	0.00117108	0.00135342	-0.869379	5.40711e-06	5.26703	0.000940021	3.02686
A0A0H3C630	A0A0H3C630_CAUVN			ABC-transporter substrate binding protein	0.000348797	2	2	2	2	1	2	2							20.1794	20.9123	20.2472	20.1238	20.2262	20.3196	20.1794	20.9123	20.2472	20.1238	20.2262	20.3196	20.4859	20.2254	0.0198071	0.00484275	-0.260442	0.334196	0.475999	0.467791	0.329948
A0A0H3C631	A0A0H3C631_CAUVN			Heme chaperone HemW	0.000348797	9	9	9	8	8	7	8							23.5582	23.7262	23.646	23.8466	23.6124	23.7217	23.5582	23.7262	23.646	23.8466	23.6124	23.7217	23.6451	23.7301	0.00355568	0.00493824	0.0849871	0.357653	0.446539	0.489786	0.309993
A0A0H3C632	A0A0H3C632_CAUVN			TonB-dependent receptor	0.000348797	47	46	47	47	44	46	45							28.2974	28.2551	28.2057	28.1999	28.1759	28.2213	28.2974	28.2551	28.2057	28.1999	28.1759	28.2213	28.2532	28.1991	0.00162484	0.000804988	-0.054054	0.323428	0.490222	0.457647	0.33947
A0A0H3C636	A0A0H3C636_CAUVN			Cro/CI-family transcriptional regulator	0.0010142	1	1	1	1	1	1	1							23.3697	23.3311	23.1225	23.2837	23.4188	23.418	23.3697	23.3311	23.1225	23.2837	23.4188	23.418	23.2784	23.3749	0.0057141	0.00332596	0.0964482	0.303793	0.517422	0.439962	0.356585
A0A0H3C637	A0A0H3C637_CAUVN			Nitrogen regulatory protein P-II	0.000348797	6	6	6	6	6	6	6							25.9741	25.9338	25.9344	25.8617	25.9094	25.8734	25.9741	25.9338	25.9344	25.8617	25.9094	25.8734	25.9475	25.8816	0.000889153	0.000960281	-0.0659131	0.20378	0.690839	0.332049	0.478798
A0A0H3C639	A0A0H3C639_CAUVN			Uncharacterized protein	0.000348797	13	12	13	13	13	13	12							24.9335	25.1498	24.7266	25.0161	25.3026	25.0875	24.9335	25.1498	24.7266	25.0161	25.3026	25.0875	24.947	25.1406	0.00848756	0.00593379	0.193672	0.196266	0.707155	0.324177	0.489218
A0A0H3C640	A0A0H3C640_CAUVN			Conserved hypothetical cytosolic protein	0.000348797	3	3	3	3	2	3	2							22.3647	22.29	21.9756	22.0295	22.2521	20.5951	22.3647	22.29	21.9756	22.0295	22.2521	20.5951	22.2197	21.7876	0.00929858	0.0415878	-0.432112	0.25431	0.594637	0.389589	0.409393
A0A0H3C642	A0A0H3C642_CAUVN			Uncharacterized protein	0.00914734	1	1	1	1	1	1	1							18.7626	19.1969	19.6767	19.6839	19.3215	18.7314	18.7626	19.1969	19.6767	19.6839	19.3215	18.7314	19.2602	19.2972	0.0237986	0.02498	0.0369783	0.922938	0.0348275	0.949609	0.0224553
A0A0H3C643	A0A0H3C643_CAUVN	A0A0H3CA96; A0A0H3C643	CCNA_00566;CCNA_02903	Mannonate dehydratase	0.000348797	11	7	6	8	10	11	11	1	1	2	3	3	3	24.4749	24.3397	24.8177	26.8031	26.7429	26.7422	24.4749	24.3397	24.8177	26.8031	26.7429	26.7422	24.5584	26.763	0.0100383	0.00130522	2.2046	6.27423e-06	5.20244	0.000956808	3.01918
A0A0H3C645	A0A0H3C645_CAUVN			Polyisoprenylphosphate hexose-1-phosphotransferase pssY	0.000348797	9	9	9	9	8	9	7							24.6133	24.7332	24.7964	24.7692	24.6902	24.1624	24.6133	24.7332	24.7964	24.7692	24.6902	24.1624	24.7163	24.5646	0.00376311	0.0134432	-0.151666	0.362746	0.440397	0.495638	0.304835
A0A0H3C646	A0A0H3C646_CAUVN			Type I secretion protein CdzA, transmembrane ATPase/peptidase	0.000348797	31	28	30	28	27	30	31							26.7065	26.762	26.7189	26.9412	27.0144	27.3066	26.7065	26.762	26.7189	26.9412	27.0144	27.3066	26.7294	27.0962	0.00108972	0.00713724	0.366849	0.0170733	1.76768	0.0652891	1.18516
A0A0H3C649	A0A0H3C649_CAUVN			TonB-dependent receptor	0.000348797	11	9	9	10	9	11	10							22.3732	22.443	23.2213	22.7492	23.1771	23.1759	22.3732	22.443	23.2213	22.7492	23.1771	23.1759	22.733	23.0477	0.0207579	0.0107112	0.314656	0.236026	0.62704	0.368494	0.43357
A0A0H3C650	A0A0H3C650_CAUVN			Oligopeptide-binding protein oppA	0.000348797	5	3	4	3	4	5	5							23.5965	23.6633	24.1299	24.5152	24.4821	24.3973	23.5965	23.6633	24.1299	24.5152	24.4821	24.3973	23.8167	24.4657	0.0122129	0.00248652	0.648985	0.00594564	2.2258	0.0325394	1.48759
A0A0H3C651	A0A0H3C651_CAUVN			FAD-linked oxidoreductase	0.000348797	17	17	16	14	10	8	12							24.5858	24.602	24.5674	23.0296	22.808	23.6529	24.5858	24.602	24.5674	23.0296	22.808	23.6529	24.5851	23.2093	0.000703323	0.0189127	-1.3758	0.000981531	3.0081	0.0112521	1.94877
A0A0H3C652	A0A0H3C652_CAUVN			Ribosomal-protein-alanine acetyltransferase	0.000348797	15	13	13	14	14	12	13							26.2933	26.2645	26.3049	26.4844	26.2797	26.288	26.2933	26.2645	26.3049	26.4844	26.2797	26.288	26.2877	26.3538	0.000789971	0.00439694	0.0661784	0.418217	0.378598	0.543646	0.264684
A0A0H3C653	A0A0H3C653_CAUVN			Type II secretion system core protein G	0.000348797	5	5	5	4	4	5	5							22.9888	22.9688	22.6024	22.811	23.1863	23.0236	22.9888	22.9688	22.6024	22.811	23.1863	23.0236	22.864	23.0151	0.00951995	0.00817912	0.151128	0.344975	0.462212	0.477841	0.320717
A0A0H3C654	A0A0H3C654_CAUVN			Lysozyme family protein	0.000348797	5	5	4	5	2	3	2							22.7018	22.6232	22.7011	20.8497	21.8262	21.1247	22.7018	22.6232	22.7011	20.8497	21.8262	21.1247	22.6758	21.3274	0.00199241	0.0236775	-1.34838	0.00199312	2.70047	0.0167256	1.77662
A0A0H3C655	A0A0H3C655_CAUVN			GumN superfamily protein	0.000348797	11	10	10	10	10	11	11							25.5939	25.5201	25.4045	25.4133	25.8113	25.7468	25.5939	25.5201	25.4045	25.4133	25.8113	25.7468	25.5082	25.6674	0.003743	0.00832585	0.159156	0.271286	0.566573	0.407333	0.39005
A0A0H3C657	A0A0H3C657_CAUVN			Type II secretion pathway protein L	0.000348797	10	9	10	9	9	9	9							23.1291	23.4645	23.119	23.3447	23.4939	23.5126	23.1291	23.4645	23.119	23.3447	23.4939	23.5126	23.2467	23.4523	0.00846053	0.00392467	0.205672	0.12	0.920818	0.233132	0.632397
A0A0H3C658	A0A0H3C658_CAUVN			Uncharacterized protein	0.0010142	1	1	1	1	1	1	1							24.5491	24.3363	24.3494	23.3833	24.3702	24.3624	24.5491	24.3363	24.3494	23.3833	24.3702	24.3624	24.4149	24.1067	0.00488475	0.0236091	-0.308245	0.250697	0.60085	0.385227	0.414283
A0A0H3C659	A0A0H3C659_CAUVN			Riboflavin biosynthesis protein	0.000348797	25	23	24	24	23	23	23							27.1505	27.118	27.197	27.1818	27.0816	27.1159	27.1505	27.118	27.197	27.1818	27.0816	27.1159	27.1555	27.127	0.00146247	0.00187853	-0.0285033	0.610158	0.214557	0.7139	0.146363
A0A0H3C660	A0A0H3C660_CAUVN			Uncharacterized protein	0.000348797	23	23	23	23	23	23	23							29.1135	29.154	29.0043	28.8839	29.0309	28.8945	29.1135	29.154	29.0043	28.8839	29.0309	28.8945	29.092	28.938	0.00266161	0.00283345	-0.153979	0.0748958	1.12554	0.169865	0.769896
A0A0H3C661	A0A0H3C661_CAUVN			Epoxide hydrolase	0.000348797	5	5	5	5	4	4	4							24.0143	24.0572	23.8649	23.2486	23.206	23.2097	24.0143	24.0572	23.8649	23.2486	23.206	23.2097	23.9811	23.2216	0.0042092	0.00101465	-0.759569	5.35107e-05	4.27156	0.00244933	2.61095
A0A0H3C662	A0A0H3C662_CAUVN			TonB-dependent receptor	0.000348797	33	31	32	29	30	28	33							26.1571	26.0289	25.9485	26.1647	26.0572	26.7823	26.1571	26.0289	25.9485	26.1647	26.0572	26.7823	26.0474	26.3716	0.00403957	0.0148582	0.324171	0.2119	0.673868	0.342327	0.465559
A0A0H3C665	A0A0H3C665_CAUVN			Uncharacterized protein	0.000348797	13	12	13	12	13	13	13							25.0279	25.0085	25.0767	24.7771	24.8926	25.0427	25.0279	25.0085	25.0767	24.7771	24.8926	25.0427	25.038	24.9083	0.00140278	0.00534745	-0.129723	0.152496	0.816742	0.273244	0.563449
A0A0H3C666	A0A0H3C666_CAUVN			Acyl-CoA hydrolase	0.000348797	5	5	5	4	5	5	4							23.8714	23.9339	23.7945	24.2899	24.0442	23.957	23.8714	23.9339	23.7945	24.2899	24.0442	23.957	23.8677	24.104	0.00292534	0.00716446	0.236322	0.0681004	1.16685	0.158866	0.798969
A0A0H3C669	A0A0H3C669_CAUVN			Conserved hypothetical membrane protein	0.000348797	7	5	6	6	5	7	5							26.415	26.6415	26.7458	26.5564	26.7199	26.6613	26.415	26.6415	26.7458	26.5564	26.7199	26.6613	26.6073	26.6474	0.00635758	0.00310772	0.0401488	0.676752	0.16957	0.765211	0.116219
A0A0H3C670	A0A0H3C670_CAUVN			FeaR-family transcriptional regulator	0.000348797	21	18	18	18	16	17	18							25.4042	25.3792	25.6198	25.4393	25.4295	25.4419	25.4042	25.3792	25.6198	25.4393	25.4295	25.4419	25.4718	25.4369	0.00519506	0.000257297	-0.0349253	0.708153	0.149873	0.786617	0.104237
A0A0H3C671	A0A0H3C671_CAUVN			50S ribosomal protein L19	0.000348797	18	18	17	18	17	16	18							30.5213	30.4367	30.422	30.6918	30.3409	30.6136	30.5213	30.4367	30.422	30.6918	30.3409	30.6136	30.4607	30.5565	0.0017602	0.00603097	0.0957803	0.429494	0.367043	0.553809	0.25664
A0A0H3C672	A0A0H3C672_CAUVN			Beta-lactamase	0.000348797	19	18	19	18	17	18	18							26.0553	26.0701	26.1477	25.9227	25.8312	25.9568	26.0553	26.0701	26.1477	25.9227	25.8312	25.9568	26.0916	25.9046	0.00190202	0.00250703	-0.187011	0.0214301	1.66898	0.0757196	1.12079
A0A0H3C673	A0A0H3C673_CAUVN			Isopenicillin N epimerase	0.000348797	10	9	10	10	10	9	10							24.5249	24.5862	24.7972	24.4313	24.1759	24.196	24.5249	24.5862	24.7972	24.4313	24.1759	24.196	24.6409	24.2725	0.00579808	0.00585327	-0.368408	0.0168939	1.77227	0.0650148	1.18699
A0A0H3C674	A0A0H3C674_CAUVN			23S rRNA Gm2251 methyltransferase	0.000348797	19	19	18	19	16	19	17							26.5466	26.6219	26.6473	26.645	26.5944	26.4823	26.5466	26.6219	26.6473	26.645	26.5944	26.4823	26.6059	26.5755	0.00196886	0.00313346	-0.030424	0.646086	0.189709	0.74214	0.129514
A0A0H3C676	A0A0H3C676_CAUVN			Lrp-family transcriptional regulator	0.00463423	1	1	1	1	1	1	1							20.2495	20.3094	20.0393	20.3456	20.0117	20.0672	20.2495	20.3094	20.0393	20.3456	20.0117	20.0672	20.204	20.1491	0.00702217	0.00888371	-0.0549169	0.650282	0.186898	0.744694	0.128022
A0A0H3C677	A0A0H3C677_CAUVN			DesA-family fatty acid desaturase	0.000348797	6	5	5	5	4	5	5							23.06	23.2634	23.4856	23.2259	23.5083	23.3125	23.06	23.2634	23.4856	23.2259	23.5083	23.3125	23.2801	23.3538	0.00914954	0.00619621	0.0736248	0.578983	0.237335	0.688896	0.161847
A0A0H3C678	A0A0H3C678_CAUVN			Long-chain-fatty-acid--CoA ligase	0.000348797	9	9	9	9	7	4	5							22.9486	23.0889	22.3858	21.781	21.1521	21.9122	22.9486	23.0889	22.3858	21.781	21.1521	21.9122	22.8383	21.6512	0.0163153	0.0187988	-1.1871	0.00623517	2.20515	0.0334826	1.47518
A0A0H3C680	A0A0H3C680_CAUVN			Acetyltransferase domain protein	0.000348797	16	12	13	13	14	14	15							24.5698	24.6916	24.6037	24.5916	24.6226	25.0128	24.5698	24.6916	24.6037	24.5916	24.6226	25.0128	24.6226	24.7554	0.00255428	0.00948848	0.132823	0.384407	0.415209	0.51705	0.286468
A0A0H3C682	A0A0H3C682_CAUVN	A0A0H3C682; A0A0H3C979	CCNA_00207;CCNA_02489	Succinyl-CoA:3-ketoacid-coenzyme A transferase subunit B	0.000348797	16	12	13	10	11	10	9	4	3	3	3	3	3	26.0447	26.1037	25.8184	25.7303	25.6146	25.4346	26.0447	26.1037	25.8184	25.7303	25.6146	25.4346	25.9941	25.5983	0.00579593	0.00582215	-0.395795	0.0150918	1.82126	0.0599899	1.22192
A0A0H3C683	A0A0H3C683_CAUVN			Methyl-accepting chemotaxis protein	0.000348797	6	5	6	6	4	5	4							20.6385	23.8721	21.1489	20.4066	20.3495	19.3267	20.6385	23.8721	21.1489	20.4066	20.3495	19.3267	22.618	20.1051	0.0794296	0.0303409	-2.5129	0.0926514	1.03315	0.195461	0.70894
A0A0H3C684	A0A0H3C684_CAUVN			ROS/MUCR transcriptional regulator MucR2	0.000348797	26	24	25	22	21	23	24							28.5488	28.4193	28.5382	28.7901	28.673	28.7836	28.5488	28.4193	28.5382	28.7901	28.673	28.7836	28.5033	28.7499	0.00252161	0.00228838	0.246596	0.0103137	1.98659	0.0463656	1.3338
A0A0H3C685	A0A0H3C685_CAUVN			Corrinoid adenosyltransferase	0.000348797	5	5	5	5	5	5	5							25.992	26.0839	26.0159	26.1174	25.8993	25.709	25.992	26.0839	26.0159	26.1174	25.8993	25.709	26.0311	25.9182	0.00183182	0.00788653	-0.112903	0.322587	0.491354	0.457313	0.339787
A0A0H3C686	A0A0H3C686_CAUVN			30S ribosomal protein S14	0.000348797	8	6	7	6	6	8	7							29.2121	29.1731	29.2392	29.3473	29.1601	29.3489	29.2121	29.1731	29.2392	29.3473	29.1601	29.3489	29.2084	29.2881	0.00113785	0.00370516	0.0796881	0.318727	0.496581	0.454061	0.342886
A0A0H3C688	A0A0H3C688_CAUVN			Flagellar biosynthesis protein FliO	0.000348797	9	8	9	9	7	9	9							24.3393	24.4322	24.4773	24.6828	24.588	24.6205	24.3393	24.4322	24.4773	24.6828	24.588	24.6205	24.4174	24.631	0.00288298	0.00195421	0.213561	0.0137965	1.86023	0.056476	1.24814
A0A0H3C689	A0A0H3C689_CAUVN			N-carbamoylputrescine amidase	0.000348797	18	17	17	17	17	18	17							26.5755	26.7314	26.7482	27.0523	26.7788	27.0654	26.5755	26.7314	26.7482	27.0523	26.7788	27.0654	26.6871	26.9714	0.00356778	0.00600005	0.284298	0.0370839	1.43081	0.106493	0.972679
A0A0H3C690	A0A0H3C690_CAUVN			Phosphodiesterase I/nucleotide pyrophosphatase	0.000348797	3	3	2	1	2	1	1							19.7958	19.8949	18.4916	17.5057	18.6362	16.1709	19.7958	19.8949	18.4916	17.5057	18.6362	16.1709	19.5189	17.763	0.0403802	0.070768	-1.75588	0.0392515	1.40614	0.110133	0.958082
A0A0H3C692	A0A0H3C692_CAUVN			Uncharacterized protein	0.000348797	20	20	20	20	20	19	20							29.7355	29.6732	29.7071	29.5651	29.4325	29.561	29.7355	29.6732	29.7071	29.5651	29.4325	29.561	29.7055	29.5208	0.00105126	0.00255427	-0.18469	0.0220958	1.65569	0.0772585	1.11205
A0A0H3C693	A0A0H3C693_CAUVN			Thiol:disulfide interchange protein DsbD	0.000348797	21	20	20	21	20	20	21							26.2233	26.3016	26.3469	26.2976	26.5239	26.4924	26.2233	26.3016	26.3469	26.2976	26.5239	26.4924	26.2915	26.4414	0.00237817	0.00463644	0.149864	0.121098	0.916863	0.234378	0.630083
A0A0H3C694	A0A0H3C694_CAUVN			N-formylglutamate deformylase	0.000348797	10	0	1	0	0	0	0							NA	19.8029	NA	NA	NA	NA	19.5669	19.8029	17.7353	17.5519	17.9834	20.8965	19.2798	19.6116	0.0594589	0.0967155	0.331745	0.840223	0.0756055	0.886282	0.0524278
A0A0H3C695	A0A0H3C695_CAUVN			PAS family GGDEF/EAL protein	0.000348797	6	5	5	4	2	1	2							21.5551	21.7886	22.4706	20.6694	19.4392	20.2565	21.5551	21.7886	22.4706	20.6694	19.4392	20.2565	21.9923	20.207	0.0216829	0.0311161	-1.78525	0.00455215	2.34178	0.0271244	1.56664
A0A0H3C696	A0A0H3C696_CAUVN			Periplasmic serine endoprotease DegP-like	0.000348797	27	27	27	26	26	26	26							28.4611	28.4063	28.4113	28.2985	28.1483	28.1422	28.4611	28.4063	28.4113	28.2985	28.1483	28.1422	28.4265	28.1982	0.00106528	0.00313933	-0.228306	0.0125802	1.90031	0.0528579	1.27689
A0A0H3C698	A0A0H3C698_CAUVN			TonB-dependent receptor protein	0.000348797	33	33	33	33	31	33	33							28.4897	28.3484	28.1844	27.6739	27.9821	28.0809	28.4897	28.3484	28.1844	27.6739	27.9821	28.0809	28.3462	27.9225	0.00539174	0.00760582	-0.423714	0.0227549	1.64292	0.0786191	1.10447
A0A0H3C699	A0A0H3C699_CAUVN			Copper resistance protein B	0.000348797	11	11	11	11	11	11	10							25.0239	25.1021	25.3095	24.8567	24.876	24.6827	25.0239	25.1021	25.3095	24.8567	24.876	24.6827	25.1503	24.8077	0.00586998	0.00429148	-0.342555	0.0165937	1.78006	0.0645168	1.19033
A0A0H3C6A0	A0A0H3C6A0_CAUVN			Aminobenzoyl-glutamate transport protein	0.000348797	12	11	11	10	12	12	12							24.5137	24.7161	24.8154	25.3454	25.4531	25.6957	24.5137	24.7161	24.8154	25.3454	25.4531	25.6957	24.6871	25.5056	0.00622942	0.00703606	0.818472	0.000888293	3.05144	0.0109982	1.95868
A0A0H3C6A1	A0A0H3C6A1_CAUVN			Nitrate transport permease protein nrtB	0.00722022	2	1	1	2	0	0	1							18.2011	19.0081	21.5419	NA	NA	15.8436	18.2011	19.0081	21.5419	21.7861	19.1843	15.8436	20.3033	20.4411	0.0890125	0.157299	0.137783	0.719846	0.142761	0.796868	0.0986134
A0A0H3C6A3	A0A0H3C6A3_CAUVN			Pseudouridine synthase	0.000348797	22	20	19	20	20	22	21							26.7244	26.7543	26.8134	26.8795	26.7828	26.7845	26.7244	26.7543	26.8134	26.8795	26.7828	26.7845	26.7645	26.8163	0.00169233	0.00206365	0.0518185	0.39034	0.408557	0.522008	0.282323
A0A0H3C6A4	A0A0H3C6A4_CAUVN			TonB-dependent receptor	0.000348797	18	17	18	18	10	13	12							24.0964	24.0336	24.4782	22.4722	23.3704	22.5806	24.0964	24.0336	24.4782	22.4722	23.3704	22.5806	24.2165	22.8661	0.00994043	0.0214971	-1.35038	0.00296364	2.52817	0.020773	1.6825
A0A0H3C6A5	A0A0H3C6A5_CAUVN			Nitrite reductase (NAD(P)H) catalytic subunit	0.000348797	24	9	8	24	1	2	2							21.7865	23.5192	25.7843	18.0316	23.2006	23.3522	21.7865	23.5192	25.7843	18.0316	23.2006	23.3522	24.5449	22.7123	0.0846033	0.1407	-1.83262	0.277722	0.55639	0.413905	0.383099
A0A0H3C6A7	A0A0H3C6A7_CAUVN			Two-component response regulator protein	0.000348797	17	15	16	17	17	17	17							26.1352	26.6509	26.0908	26.4547	26.4163	26.4786	26.1352	26.6509	26.0908	26.4547	26.4163	26.4786	26.3155	26.4501	0.0118435	0.00118675	0.134595	0.368175	0.433946	0.501468	0.299756
A0A0H3C6A8	A0A0H3C6A8_CAUVN			Uncharacterized protein	0.000348797	5	5	5	5	5	5	5							26.6264	26.5899	26.5804	26.513	26.5446	26.5165	26.6264	26.5899	26.5804	26.513	26.5446	26.5165	26.599	26.5248	0.000913209	0.000653452	-0.0742769	0.154992	0.80969	0.27543	0.559989
A0A0H3C6A9	A0A0H3C6A9_CAUVN			Site-specific DNA-methyltransferase (adenine-specific)	0.000348797	37	35	35	34	29	32	30							27.0446	27.0485	27.026	26.7616	26.7565	26.8113	27.0446	27.0485	27.026	26.7616	26.7565	26.8113	27.0397	26.7767	0.000444303	0.00112977	-0.263055	0.00162057	2.79033	0.0147884	1.83008
A0A0H3C6B2	A0A0H3C6B2_CAUVN			Transporter, major facilitator superfamily	0.000348797	4	3	4	4	4	4	3							23.0807	23.6395	23.5592	22.9642	22.3457	23.3302	23.0807	23.6395	23.5592	22.9642	22.3457	23.3302	23.4467	22.9351	0.0128974	0.0217481	-0.511612	0.114758	0.940217	0.226295	0.645325
A0A0H3C6B3	A0A0H3C6B3_CAUVN			Transposase	0.000348797	9	8	8	8	7	7	8							24.9941	24.9095	24.8517	25.1515	25.1172	24.7414	24.9941	24.9095	24.8517	25.1515	25.1172	24.7414	24.9196	25.015	0.00287311	0.00909887	0.0953189	0.526191	0.278856	0.641754	0.192632
A0A0H3C6B4	A0A0H3C6B4_CAUVN			5-dehydro-2-deoxygluconokinase IolC	0.000348797	20	3	5	4	3	3	5							20.9794	21.3317	21.4382	20.8049	20.6208	21.4841	20.9794	21.3317	21.4382	20.8049	20.6208	21.4841	21.2627	21.0196	0.0112986	0.0216816	-0.243098	0.32385	0.489656	0.458029	0.339107
A0A0H3C6B5	A0A0H3C6B5_CAUVN			PTS system, IIA component	0.000348797	20	20	18	20	18	19	20							25.695	25.6332	25.5392	25.5392	25.5442	25.6066	25.695	25.6332	25.5392	25.5392	25.5442	25.6066	25.6239	25.5636	0.00306024	0.00146882	-0.0602508	0.369277	0.432648	0.502516	0.29885
A0A0H3C6B6	A0A0H3C6B6_CAUVN			Cytochrome bd-type quinol oxidase, subunit 1 cydA	0.000348797	14	14	14	14	12	13	14							26.3686	26.6236	26.2742	25.911	25.8356	26.1416	26.3686	26.6236	26.2742	25.911	25.8356	26.1416	26.4298	25.9687	0.00683983	0.00613959	-0.461113	0.0130219	1.88532	0.0541117	1.26671
A0A0H3C6B7	A0A0H3C6B7_CAUVN			Lipopolysaccharide biosynthesis protein	0.000348797	8	8	8	7	6	7	8							23.5241	23.5134	23.4441	23.6864	23.5492	23.8237	23.5241	23.5134	23.4441	23.6864	23.5492	23.8237	23.4943	23.6908	0.00184882	0.00579296	0.196463	0.0637197	1.19573	0.152533	0.816635
A0A0H3C6B8	A0A0H3C6B8_CAUVN			M14 peptidase-family protein	0.000348797	49	41	38	31	35	34	34							26.9051	26.7501	26.5931	26.7533	26.809	26.5959	26.9051	26.7501	26.5931	26.7533	26.809	26.5959	26.755	26.7222	0.00583087	0.00413662	-0.0328072	0.783205	0.106124	0.845314	0.072982
A0A0H3C6B9	A0A0H3C6B9_CAUVN			Two-component receiver protein SpdR	0.000348797	10	10	10	9	10	9	8							26.5682	26.4707	26.389	26.0894	26.1927	26.1215	26.5682	26.4707	26.389	26.0894	26.1927	26.1215	26.4778	26.1352	0.00338883	0.00202437	-0.342632	0.00292691	2.53359	0.0206457	1.68517
A0A0H3C6C0	A0A0H3C6C0_CAUVN			PepSY superfamily protein	0.000348797	6	4	6	4	3	2	3							23.5945	26.2649	23.2314	22.7647	20.9541	22.5495	23.5945	26.2649	23.2314	22.7647	20.9541	22.5495	25.0352	22.2817	0.0679929	0.0447775	-2.75346	0.0591462	1.22807	0.146214	0.835011
A0A0H3C6C3	A0A0H3C6C3_CAUVN			Quinone oxidoreductase	0.000348797	11	10	11	10	11	10	11							24.8135	24.7695	24.7331	24.5094	24.4897	24.5374	24.8135	24.7695	24.7331	24.5094	24.4897	24.5374	24.7724	24.5123	0.00162404	0.000978134	-0.260128	0.00232252	2.63404	0.0182241	1.73935
A0A0H3C6C5	A0A0H3C6C5_CAUVN			Penicillin-insensitive transglycosylase	0.000348797	43	43	42	41	42	43	42							27.968	27.9695	27.9585	28.1437	28.0339	28.1238	27.968	27.9695	27.9585	28.1437	28.0339	28.1238	27.9654	28.1012	0.000212457	0.00208173	0.135869	0.0431873	1.36464	0.117421	0.930253
A0A0H3C6C6	A0A0H3C6C6_CAUVN			Uncharacterized protein	0.000348797	5	5	5	5	5	5	5							23.9171	23.7448	23.6628	23.6531	23.8349	23.7615	23.9171	23.7448	23.6628	23.6531	23.8349	23.7615	23.7788	23.7517	0.00545919	0.00385206	-0.0270625	0.789453	0.102674	0.849942	0.0706109
A0A0H3C6C7	A0A0H3C6C7_CAUVN			Peptide methionine sulfoxide reductase MsrA	0.000348797	14	12	13	13	13	14	14							27.2829	27.2863	27.1738	27.8292	27.7864	27.7269	27.2829	27.2863	27.1738	27.8292	27.7864	27.7269	27.2486	27.7814	0.00234859	0.00184877	0.532846	0.000173285	3.76124	0.00459206	2.33799
A0A0H3C6C8	A0A0H3C6C8_CAUVN			Anti-sigma factor, ChrR-family	0.000348797	7	5	6	5	5	5	5							23.2578	23.2842	22.8991	23.521	23.8877	23.3593	23.2578	23.2842	22.8991	23.521	23.8877	23.3593	23.1574	23.6066	0.00929341	0.0114766	0.449169	0.0500754	1.30038	0.130637	0.883934
A0A0H3C6D0	A0A0H3C6D0_CAUVN			TonB-dependent receptor	0.000348797	6	6	6	6	4	3	0							22.4696	22.3975	21.8718	20.2464	19.657	NA	22.4696	22.3975	21.8718	20.2464	19.657	21.0892	22.2698	20.4515	0.0146692	0.0354059	-1.81833	0.00366394	2.43605	0.0239567	1.62057
A0A0H3C6D1	A0A0H3C6D1_CAUVN			Adenosylhomocysteinase	0.000348797	77	76	75	77	74	76	75							31.7439	31.6992	31.7528	31.8871	31.9946	32.0646	31.7439	31.6992	31.7528	31.8871	31.9946	32.0646	31.7321	31.9839	0.00090547	0.00279577	0.251788	0.00894854	2.04825	0.042174	1.37496
A0A0H3C6D2	A0A0H3C6D2_CAUVN			Cytokinin riboside 5'-monophosphate phosphoribohydrolase	0.000348797	7	7	6	6	7	6	7							24.4132	24.1507	24.2185	23.8769	23.8809	24.0292	24.4132	24.1507	24.2185	23.8769	23.8809	24.0292	24.2651	23.9307	0.00561714	0.00362779	-0.334388	0.0125136	1.90262	0.0527982	1.27738
A0A0H3C6D4	A0A0H3C6D4_CAUVN			3-ketoacyl-CoA thiolase	0.000348797	9	9	9	8	7	9	7							24.5911	24.6124	24.34	24.0913	23.9533	24.0828	24.5911	24.6124	24.34	24.0913	23.9533	24.0828	24.5197	24.0438	0.0061789	0.00321736	-0.475889	0.00322101	2.49201	0.022088	1.65584
A0A0H3C6D5	A0A0H3C6D5_CAUVN			Methyltransferase	0.000348797	40	37	37	38	36	37	37							27.3825	27.351	27.2579	27.3329	27.307	27.489	27.3825	27.351	27.2579	27.3329	27.307	27.489	27.3314	27.3785	0.00237061	0.00359624	0.0471421	0.551016	0.258836	0.662667	0.178705
A0A0H3C6D7	A0A0H3C6D7_CAUVN			Uncharacterized protein	0.000348797	7	6	6	5	7	5	6							24.4028	24.4552	24.3755	24.9069	24.9007	24.975	24.4028	24.4552	24.3755	24.9069	24.9007	24.975	24.4116	24.9279	0.00165804	0.00165374	0.516365	0.000100229	3.99901	0.00339939	2.4686
A0A0H3C6D8	A0A0H3C6D8_CAUVN			ATP-dependent DNA helicase	0.000348797	23	18	20	20	21	23	22							25.2832	25.2768	25.3953	25.624	25.706	25.8045	25.2832	25.2768	25.3953	25.624	25.706	25.8045	25.3195	25.7134	0.00263338	0.00351525	0.393932	0.00187837	2.72622	0.0161321	1.79231
A0A0H3C6D9	A0A0H3C6D9_CAUVN			Long-chain-fatty-acid--CoA ligase	0.000348797	20	20	20	20	14	17	15							25.8625	25.8996	25.6456	24.3993	24.4987	24.5095	25.8625	25.8996	25.6456	24.3993	24.4987	24.5095	25.8068	24.47	0.00531697	0.00248247	-1.33682	1.00708e-05	4.99694	0.00112681	2.94815
A0A0H3C6E0	A0A0H3C6E0_CAUVN			2-dehydro-3-deoxy-6-phosphogalactonate aldolase	0.000348797	6	6	6	5	6	5	5							23.4766	23.2157	23.2021	23.065	22.9273	23.0046	23.4766	23.2157	23.2021	23.065	22.9273	23.0046	23.3038	23.0001	0.00663995	0.00300226	-0.303703	0.0217497	1.66255	0.0763419	1.11724
A0A0H3C6E1	A0A0H3C6E1_CAUVN			Membrane fusion protein (MFP) family protein	0.000348797	47	46	45	43	45	42	45							29.0555	29.0632	29.1079	29.2515	29.0785	29.1538	29.0555	29.0632	29.1079	29.2515	29.0785	29.1538	29.0757	29.163	0.000972579	0.00297476	0.0873136	0.220642	0.656312	0.351191	0.454457
A0A0H3C6E2	A0A0H3C6E2_CAUVN			DNA polymerase III subunit gamma/tau	0.000348797	31	31	27	25	27	28	27							26.7586	26.6539	26.7385	27.0311	26.9346	26.8088	26.7586	26.6539	26.7385	27.0311	26.9346	26.8088	26.7177	26.9277	0.00208044	0.00413851	0.209976	0.0356515	1.44792	0.10366	0.984387
A0A0H3C6E3	A0A0H3C6E3_CAUVN			Cold shock protein CspB	0.00332889	1	1	1	1	1	1	1							21.1254	21.1525	21.2496	21.8259	21.3344	21.1766	21.1254	21.1525	21.2496	21.8259	21.3344	21.1766	21.1768	21.4729	0.00308335	0.0157919	0.296079	0.181037	0.742233	0.307081	0.512746
A0A0H3C6E4	A0A0H3C6E4_CAUVN			tRNA (Uracil-5-)-methyltransferase related protein	0.000348797	22	22	21	21	22	22	20							26.3655	26.2869	26.3362	26.5819	26.5154	26.5044	26.3655	26.2869	26.3362	26.5819	26.5154	26.5044	26.3299	26.5343	0.00150922	0.00158061	0.204438	0.00876484	2.05726	0.0420067	1.37668
A0A0H3C6E5	A0A0H3C6E5_CAUVN			Alpha-glucosidase	0.000348797	10	10	9	8	8	8	8							23.7106	23.4213	23.5138	23.125	23.4874	23.146	23.7106	23.4213	23.5138	23.125	23.4874	23.146	23.5537	23.2626	0.00627272	0.0087478	-0.291055	0.0700197	1.15478	0.161473	0.791901
A0A0H3C6E6	A0A0H3C6E6_CAUVN			Glycosyltransferase	0.000348797	16	15	16	15	16	16	16							25.716	25.8746	25.767	25.8492	25.908	26.0638	25.716	25.8746	25.767	25.8492	25.908	26.0638	25.7874	25.9432	0.00313964	0.00427484	0.155828	0.107136	0.970063	0.215916	0.665714
A0A0H3C6E7	A0A0H3C6E7_CAUVN			Conserved hypothetical membrane protein	0.000348797	12	12	12	12	12	12	12							25.0304	24.7951	24.8861	24.9181	24.717	24.9013	25.0304	24.7951	24.8861	24.9181	24.717	24.9013	24.9071	24.8483	0.00476511	0.00449164	-0.0588344	0.547681	0.261472	0.659707	0.180649
A0A0H3C6E8	A0A0H3C6E8_CAUVN			Cupin_2 domain-containing protein	0.000348797	6	6	6	6	6	6	6							23.1429	23.4774	23.3728	22.8411	22.92	22.7694	23.1429	23.4774	23.3728	22.8411	22.92	22.7694	23.3377	22.8448	0.00733446	0.00329815	-0.492893	0.0039487	2.40355	0.0249631	1.6027
A0A0H3C6E9	A0A0H3C6E9_CAUVN			Glycosyltransferase involved in cell wall biogenesis	0.000348797	6	6	5	6	6	6	6							24.6995	24.5702	24.5634	24.9149	24.6602	24.7779	24.6995	24.5702	24.5634	24.9149	24.6602	24.7779	24.6124	24.7881	0.00311746	0.00514272	0.175703	0.0924268	1.0342	0.195179	0.709567
A0A0H3C6F0	A0A0H3C6F0_CAUVN			Alpha-ketoglutarate permease	0.000348797	3	3	3	3	2	3	3							22.1524	22.4779	22.5645	21.9772	22.1276	22.3207	22.1524	22.4779	22.5645	21.9772	22.1276	22.3207	22.4089	22.1487	0.00970169	0.00777592	-0.260177	0.129571	0.887493	0.244493	0.611734
A0A0H3C6F1	A0A0H3C6F1_CAUVN			Alpha-L-fucosidase	0.000348797	6	5	4	6	4	6	5							24.0191	23.4516	24.1056	23.8664	23.9959	23.7314	24.0191	23.4516	24.1056	23.8664	23.9959	23.7314	23.8865	23.8686	0.0148889	0.00554243	-0.0179205	0.977098	0.0100617	0.983562	0.0071982
A0A0H3C6F3	A0A0H3C6F3_CAUVN			Beta/gamma crystallin family protein	0.000348797	12	11	11	9	11	10	10							25.3034	25.1485	25.2698	25.1591	25.1405	25.1874	25.3034	25.1485	25.2698	25.1591	25.1405	25.1874	25.2421	25.1625	0.00322863	0.000938765	-0.0796465	0.242709	0.614914	0.376399	0.424352
A0A0H3C6F6	A0A0H3C6F6_CAUVN			Peptidyl-prolyl cis-trans isomerase	0.000348797	11	11	11	10	9	9	10							24.71	24.5923	24.5476	24.0647	24.1785	23.9819	24.71	24.5923	24.5476	24.0647	24.1785	23.9819	24.6183	24.0773	0.00340721	0.00409953	-0.540993	0.000625578	3.20372	0.00923891	2.03438
A0A0H3C6F7	A0A0H3C6F7_CAUVN			Uncharacterized protein	0.00660284	1	0	0	0	0	0	0							NA	NA	NA	NA	NA	NA	19.8136	19.8788	19.609	20.4796	19.3465	19.3521	19.7717	19.831	0.00712249	0.0330836	0.059306	0.906294	0.0427311	0.936839	0.028335
A0A0H3C6F8	A0A0H3C6F8_CAUVN			Uncharacterized protein	0.000348797	6	5	6	5	6	6	5							22.0864	21.9813	21.7295	22.1808	22.2726	22.0085	22.0864	21.9813	21.7295	22.1808	22.2726	22.0085	21.94	22.1581	0.00836061	0.00605325	0.218068	0.11985	0.921362	0.233022	0.632604
A0A0H3C6F9	A0A0H3C6F9_CAUVN			Uncharacterized protein	0.000348797	16	15	15	14	14	16	14							25.8388	25.9836	25.9223	25.927	25.8634	25.6533	25.8388	25.9836	25.9223	25.927	25.8634	25.6533	25.9161	25.8192	0.00280463	0.00554849	-0.0968582	0.312514	0.505131	0.447231	0.349468
A0A0H3C6G0	A0A0H3C6G0_CAUVN			Histidine kinase	0.000348797	18	18	18	17	15	15	17							25.1589	24.9435	24.8973	24.6614	24.8448	24.9441	25.1589	24.9435	24.8973	24.6614	24.8448	24.9441	25.0045	24.8215	0.00558481	0.00577941	-0.182952	0.145419	0.837379	0.263635	0.578997
A0A0H3C6G1	A0A0H3C6G1_CAUVN			Metal-dependent hydrolase	0.000348797	23	23	22	21	21	22	22							29.0787	29.0233	29.2131	29.1159	29.1444	29.3044	29.0787	29.0233	29.2131	29.1159	29.1444	29.3044	29.1073	29.1907	0.00335275	0.0034811	0.0833979	0.351334	0.45428	0.483263	0.315816
A0A0H3C6G2	A0A0H3C6G2_CAUVN			Leucine-responsive regulatory family protein PutR	0.000348797	3	2	2	3	2	3	3							21.3869	21	21.846	21.6223	22.0322	21.7352	21.3869	21	21.846	21.6223	22.0322	21.7352	21.4525	21.8071	0.0197794	0.00971343	0.354667	0.161635	0.791465	0.283894	0.546843
A0A0H3C6G3	A0A0H3C6G3_CAUVN			Cell envelope integrity protein EipA	0.000348797	12	12	12	11	12	11	10							27.2737	27.1829	27.1642	27.0908	26.9701	26.9378	27.2737	27.1829	27.1642	27.0908	26.9701	26.9378	27.2077	27.0011	0.00215196	0.00298824	-0.206633	0.0216898	1.66374	0.0763419	1.11724
A0A0H3C6G4	A0A0H3C6G4_CAUVN			Beta-barrel assembly machine (BAM) protein BamF	0.000348797	14	13	13	13	13	10	12							29.0763	29.0906	29.1531	29.2138	29.0089	29.0193	29.0763	29.0906	29.1531	29.2138	29.0089	29.0193	29.107	29.0838	0.00140239	0.00396792	-0.0232454	0.738673	0.131548	0.809844	0.0915986
A0A0H3C6G6	A0A0H3C6G6_CAUVN			ACT domain protein	0.000348797	13	13	12	12	13	13	13							26.6803	26.3944	26.4232	27.2095	27.2276	27.2236	26.6803	26.3944	26.4232	27.2095	27.2276	27.2236	26.5051	27.2203	0.00594139	0.000348999	0.715156	0.000307318	3.51241	0.00625003	2.20412
A0A0H3C6G7	A0A0H3C6G7_CAUVN			3-hydroxybutyryl-CoA dehydratase	0.000348797	3	3	3	3	3	3	3							25.9501	25.9269	25.8933	25.9201	25.6674	25.643	25.9501	25.9269	25.8933	25.9201	25.6674	25.643	25.9237	25.749	0.00110116	0.00596053	-0.174619	0.0921082	1.0357	0.195037	0.709882
A0A0H3C6G8	A0A0H3C6G8_CAUVN			Acyl-CoA dehydrogenase, short-chain specific	0.000348797	27	12	12	13	8	11	12							25.0891	24.9192	24.967	24.3757	24.4597	24.6358	25.0891	24.9192	24.967	24.3757	24.4597	24.6358	24.9936	24.4945	0.00350642	0.00542051	-0.499068	0.00190083	2.72106	0.0162011	1.79045
A0A0H3C6G9	A0A0H3C6G9_CAUVN			Transcriptional regulator TipR	0.000348797	7	7	7	5	5	5	5							23.5587	23.184	22.9907	22.7467	22.7333	23.0668	23.5587	23.184	22.9907	22.7467	22.7333	23.0668	23.264	22.8573	0.0124257	0.00826307	-0.406697	0.0702164	1.15356	0.161673	0.791361
A0A0H3C6H0	A0A0H3C6H0_CAUVN			Acylamino-acid-releasing enzyme	0.000348797	25	25	24	24	23	23	24							25.7271	25.5773	25.6914	25.0564	24.9114	25.1346	25.7271	25.5773	25.6914	25.0564	24.9114	25.1346	25.6666	25.0371	0.00304787	0.00452493	-0.629543	0.000360674	3.44288	0.00648904	2.18782
A0A0H3C6H2	A0A0H3C6H2_CAUVN			3-deoxy-D-manno-octulosonic acid transferase	0.000348797	5	5	5	5	5	5	5							23.3587	23.1195	23.1636	23.2831	23.0142	23.0989	23.3587	23.1195	23.1636	23.2831	23.0142	23.0989	23.2177	23.1365	0.00548401	0.00594264	-0.0812899	0.455638	0.34138	0.577383	0.238536
A0A0H3C6H3	A0A0H3C6H3_CAUVN			Glucose/fructose transport protein	0.000348797	9	9	9	9	8	9	9							25.8459	25.9717	26.1735	25.6167	25.5455	25.7022	25.8459	25.9717	26.1735	25.6167	25.5455	25.7022	26.0034	25.6229	0.00635699	0.00306105	-0.380498	0.0113174	1.94625	0.0489827	1.30996
A0A0H3C6H4	A0A0H3C6H4_CAUVN			5-aminolevulinate synthase	0.000348797	11	11	10	11	8	9	9							24.576	24.5518	24.442	24.5289	24.4557	24.3176	24.576	24.5518	24.442	24.5289	24.4557	24.3176	24.5244	24.4367	0.00291182	0.00439107	-0.0877425	0.292877	0.533315	0.428257	0.368295
A0A0H3C6H5	A0A0H3C6H5_CAUVN			Antitoxin protein parD2	0.000348797	3	3	3	3	3	3	3							22.7503	22.6259	22.5116	22.4416	22.4749	22.2308	22.7503	22.6259	22.5116	22.4416	22.4749	22.2308	22.6326	22.3864	0.00527427	0.00591322	-0.246143	0.0492428	1.30766	0.129134	0.888959
A0A0H3C6H6	A0A0H3C6H6_CAUVN			Xylonate dehydratase xylD	0.000348797	30	26	27	25	25	28	27							25.9445	25.8893	25.6246	25.7909	25.8166	25.9038	25.9445	25.8893	25.6246	25.7909	25.8166	25.9038	25.8261	25.8379	0.0066231	0.00228938	0.0118722	0.864957	0.0630054	0.906674	0.0425487
A0A0H3C6H7	A0A0H3C6H7_CAUVN			Uncharacterized protein	0.000348797	13	12	12	12	12	12	12							28.0819	28.0483	28.0089	28.3221	28.2535	28.2681	28.0819	28.0483	28.0089	28.3221	28.2535	28.2681	28.0467	28.2815	0.00130301	0.00127816	0.234877	0.00411423	2.38571	0.0256114	1.59157
A0A0H3C6H8	A0A0H3C6H8_CAUVN			Uncharacterized protein	0.00134998	2	2	2	2	2	2	2							21.9278	21.2501	20.839	21.3328	21.0624	19.8562	21.9278	21.2501	20.839	21.3328	21.0624	19.8562	21.41	20.8777	0.0257645	0.037888	-0.532303	0.267686	0.572374	0.40313	0.394554
A0A0H3C6H9	A0A0H3C6H9_CAUVN			Site-specific DNA-methyltransferase (adenine-specific)	0.000348797	47	40	38	38	36	40	40							26.4261	26.4362	26.5379	26.6699	26.6281	26.7925	26.4261	26.4362	26.5379	26.6699	26.6281	26.7925	26.4676	26.6985	0.00233467	0.00319961	0.230911	0.0164873	1.78285	0.06423	1.19226
A0A0H3C6I2	A0A0H3C6I2_CAUVN			Uncharacterized protein	0.000348797	4	4	4	4	4	4	4							26.0022	25.9253	25.9634	26.0984	26.03	25.9598	26.0022	25.9253	25.9634	26.0984	26.03	25.9598	25.964	26.0305	0.00148096	0.00266203	0.0665463	0.302798	0.518846	0.439363	0.357176
A0A0H3C6I3	A0A0H3C6I3_CAUVN			Uncharacterized protein	0.000348797	9	9	8	8	7	8	6							23.0052	22.7651	22.6357	23.0668	23.1383	22.6615	23.0052	22.7651	22.6357	23.0668	23.1383	22.6615	22.8102	22.9703	0.00822272	0.0112004	0.16007	0.386558	0.412785	0.51948	0.284431
A0A0H3C6I4	A0A0H3C6I4_CAUVN			Biotin synthesis protein bioC	0.000348797	11	11	10	10	9	9	10							25.0545	24.8033	24.9306	24.9699	24.8176	25.0216	25.0545	24.8033	24.9306	24.9699	24.8176	25.0216	24.9331	24.939	0.00503828	0.0042517	0.00588532	0.942279	0.0258203	0.959717	0.0178569
A0A0H3C6I5	A0A0H3C6I5_CAUVN			Uncharacterized protein	0.000348797	3	3	3	3	2	3	3							23.323	23.5959	23.6036	23.5601	23.7472	23.501	23.323	23.5959	23.6036	23.5601	23.7472	23.501	23.5133	23.6066	0.00679833	0.00544502	0.0933526	0.423182	0.373473	0.547884	0.261312
A0A0H3C6I6	A0A0H3C6I6_CAUVN			MA superfamily peptidase	0.000348797	22	22	21	21	21	21	21							26.3573	26.2046	26.4522	26.3422	26.2783	26.3465	26.3573	26.2046	26.4522	26.3422	26.2783	26.3465	26.3416	26.3227	0.00474249	0.00145104	-0.0189107	0.846857	0.0721898	0.892346	0.0494668
A0A0H3C6I8	A0A0H3C6I8_CAUVN			PAS-family sensor histidine kinase	0.000348797	18	17	16	18	15	15	13							24.3233	24.4062	24.4638	23.9759	23.8199	23.5007	24.3233	24.4062	24.4638	23.9759	23.8199	23.5007	24.3989	23.7788	0.00289549	0.0101908	-0.620155	0.00392725	2.40591	0.0249248	1.60337
A0A0H3C6I9	A0A0H3C6I9_CAUVN			Conserved hypothetical membrane protein	0.000348797	5	4	4	3	4	3	4							23.6587	24.0572	23.7419	23.9687	23.5862	23.6413	23.6587	24.0572	23.7419	23.9687	23.5862	23.6413	23.8297	23.7422	0.00882471	0.00871336	-0.087506	0.589138	0.229783	0.695608	0.157636
A0A0H3C6J1	A0A0H3C6J1_CAUVN			Ribosomal-protein-alanine acetyltransferase	0.000348797	5	4	4	5	4	4	5							25.3747	24.2396	25.4369	24.4369	24.2112	25.4989	25.3747	24.2396	25.4369	24.4369	24.2112	25.4989	25.1113	24.8312	0.026942	0.027821	-0.280087	0.55425	0.256294	0.665761	0.176681
A0A0H3C6J5	A0A0H3C6J5_CAUVN			Uncharacterized protein	0.000348797	11	11	11	10	10	10	10							25.9807	25.9254	25.9852	26.245	26.0864	26.0227	25.9807	25.9254	25.9852	26.245	26.0864	26.0227	25.964	26.1211	0.00128299	0.00438271	0.15705	0.0828379	1.08177	0.182002	0.739923
A0A0H3C6J6	A0A0H3C6J6_CAUVN			Carboxypeptidase S	0.000348797	25	25	24	23	22	20	21							25.8969	25.816	25.8784	25.139	24.9856	25.0751	25.8969	25.816	25.8784	25.139	24.9856	25.0751	25.8642	25.0679	0.00163816	0.00307358	-0.79624	2.52715e-05	4.59737	0.00155807	2.80741
A0A0H3C6J8	A0A0H3C6J8_CAUVN			50S ribosomal subunit assembly factor BipA	0.000348797	70	70	68	66	63	69	66							30.4314	30.3647	30.4292	30.8782	30.6809	30.7672	30.4314	30.3647	30.4292	30.8782	30.6809	30.7672	30.4088	30.7777	0.00124666	0.00321376	0.368949	0.00218926	2.6597	0.0175431	1.75589
A0A0H3C6K1	A0A0H3C6K1_CAUVN			Poly(3-hydroxyalkanoate) depolymerase	0.000348797	5	5	5	5	4	5	5							23.682	23.643	23.2837	23.2976	23.4239	23.5956	23.682	23.643	23.2837	23.2976	23.4239	23.5956	23.547	23.4442	0.00932697	0.00638264	-0.102824	0.51069	0.291843	0.628173	0.20192
A0A0H3C6K2	A0A0H3C6K2_CAUVN			Transporter, major facilitator superfamily	0.0010142	3	3	3	3	2	2	2							22.0327	22.4766	22.6716	21.6718	21.3619	21.2594	22.0327	22.4766	22.6716	21.6718	21.3619	21.2594	22.4177	21.4419	0.0146233	0.0100199	-0.975769	0.00372053	2.4294	0.0240679	1.61856
A0A0H3C6K3	A0A0H3C6K3_CAUVN			Secreted protease sapA	0.000348797	6	5	5	6	3	4	3							20.904	20.7249	20.2227	19.1765	20.23	19.4061	20.904	20.7249	20.2227	19.1765	20.23	19.4061	20.6449	19.6783	0.0171297	0.0282566	-0.966608	0.0243239	1.61397	0.0825644	1.08321
A0A0H3C6K4	A0A0H3C6K4_CAUVN			Conserved hypothetical cytosolic protein	0.000348797	46	46	45	43	42	44	45							29.0188	28.9865	28.8513	28.5416	28.7453	28.778	29.0188	28.9865	28.8513	28.5416	28.7453	28.778	28.954	28.6921	0.00306992	0.00446452	-0.261943	0.0272244	1.56504	0.0881534	1.05476
A0A0H3C6K5	A0A0H3C6K5_CAUVN			Uncharacterized protein	0.000348797	11	11	11	11	10	11	11							26.5041	26.404	26.2951	26.1165	25.9622	25.9513	26.5041	26.404	26.2951	26.1165	25.9622	25.9513	26.4036	26.012	0.00395896	0.00355175	-0.391567	0.00381651	2.41833	0.0245312	1.61028
A0A0H3C6K6	A0A0H3C6K6_CAUVN			Hypoxia transcriptional regulator FixK	0.000348797	13	8	11	7	6	6	8							23.986	24.5606	23.0978	22.5884	22.3273	23.657	23.986	24.5606	23.0978	22.5884	22.3273	23.657	24.0002	22.9786	0.03086	0.0308205	-1.02153	0.0945469	1.02435	0.19775	0.703884
A0A0H3C6K7	A0A0H3C6K7_CAUVN			Alpha/beta family hydrolase	0.000348797	6	6	6	5	5	6	5							24.2863	24.3647	23.9766	24.2597	24.2893	24.0891	24.2863	24.3647	23.9766	24.2597	24.2893	24.0891	24.2187	24.2153	0.00847675	0.00446291	-0.00339216	0.978591	0.00939859	0.984457	0.0068032
A0A0H3C6K8	A0A0H3C6K8_CAUVN			Monoamine oxidase	0.000348797	8	6	6	8	5	4	6							21.7416	22.3068	22.9855	21.6855	21.5111	21.5236	21.7416	22.3068	22.9855	21.6855	21.5111	21.5236	22.434	21.5756	0.0278715	0.00450892	-0.858397	0.0540027	1.26758	0.136406	0.865165
A0A0H3C6K9	A0A0H3C6K9_CAUVN			Two-component response regulator FixJ	0.000348797	17	15	16	14	15	15	16							26.141	26.4331	26.0949	26.3631	26.1048	26.4461	26.141	26.4331	26.0949	26.3631	26.1048	26.4461	26.2309	26.3119	0.00699396	0.00676658	0.0809378	0.565089	0.247883	0.676061	0.170014
A0A0H3C6L0	A0A0H3C6L0_CAUVN			CHASE4-family GGDEF/EAL protein	0.00134998	2	1	2	1	1	1	1							18.5924	19.1088	18.2916	18.3381	19.0503	18.831	18.5924	19.1088	18.2916	18.3381	19.0503	18.831	18.7044	18.7695	0.0221435	0.0194631	0.0650996	0.79447	0.0999225	0.853215	0.0689415
A0A0H3C6L1	A0A0H3C6L1_CAUVN			Cytochrome bd-type quinol oxidase, subunit 2 cydB	0.000348797	4	4	4	4	3	4	3							22.8741	23.1567	22.8986	21.9728	22.3462	22.2356	22.8741	23.1567	22.8986	21.9728	22.3462	22.2356	22.9823	22.1932	0.006814	0.0086474	-0.78903	0.0012643	2.89815	0.0131578	1.88082
A0A0H3C6L2	A0A0H3C6L2_CAUVN			Uncharacterized protein	0.000348797	14	10	10	10	10	8	10							25.0635	24.9328	25.0174	24.8634	24.582	24.7889	25.0635	24.9328	25.0174	24.8634	24.582	24.7889	25.0056	24.7496	0.00265044	0.00589296	-0.256003	0.0310206	1.50835	0.0956256	1.01943
A0A0H3C6L3	A0A0H3C6L3_CAUVN			Ribosomal RNA large subunit methyltransferase J	0.000348797	8	8	7	8	6	4	7							23.6256	23.201	23.352	23.1766	22.4741	23.2983	23.6256	23.201	23.352	23.1766	22.4741	23.2983	23.4037	23.0259	0.00919914	0.0193566	-0.377767	0.154917	0.809901	0.27543	0.559989
A0A0H3C6L4	A0A0H3C6L4_CAUVN			Single-stranded-DNA-specific exonuclease RecJ	0.000348797	20	11	11	12	14	15	16							23.2046	23.2063	23.7445	24.0664	23.5567	23.9851	23.2046	23.2063	23.7445	24.0664	23.5567	23.9851	23.4083	23.8861	0.0133074	0.0114717	0.477749	0.0645963	1.18979	0.153803	0.813035
A0A0H3C6L5	A0A0H3C6L5_CAUVN			Exonuclease-endonuclease-phosphatase (EEP1) protein	0.000348797	5	5	5	5	5	5	5							22.4287	22.302	22.3808	22.2882	22.0541	22.134	22.4287	22.302	22.3808	22.2882	22.0541	22.134	22.3714	22.1621	0.00285796	0.00536867	-0.209389	0.0405666	1.39183	0.112239	0.949856
A0A0H3C6L6	A0A0H3C6L6_CAUVN			Acetyl esterase	0.000348797	21	20	20	20	21	20	21							27.0889	27.0555	27.0033	26.8296	26.8339	26.8973	27.0889	27.0555	27.0033	26.8296	26.8339	26.8973	27.0497	26.8539	0.00159439	0.00141109	-0.195757	0.0104393	1.98133	0.0466491	1.33116
A0A0H3C6L7	A0A0H3C6L7_CAUVN			Protoporphyrinogen oxidase	0.000348797	6	5	6	6	2	3	3							22.7286	22.885	22.5976	20.7735	21.6713	21.3123	22.7286	22.885	22.5976	20.7735	21.6713	21.3123	22.7418	21.2982	0.00632825	0.0212622	-1.44358	0.00114946	2.93951	0.0124911	1.9034
A0A0H3C6L8	A0A0H3C6L8_CAUVN			Putative pentapeptide repeat protein	0.000348797	8	7	7	6	6	7	6							23.096	23.0824	23.072	22.8745	22.4516	22.8421	23.096	23.0824	23.072	22.8745	22.4516	22.8421	23.0835	22.7351	0.000520199	0.0103584	-0.348404	0.0303823	1.51738	0.094845	1.02299
A0A0H3C6L9	A0A0H3C6L9_CAUVN			Dioxygenase	0.000348797	13	13	13	13	11	11	11							24.2324	24.4043	24.0349	23.7284	23.9575	23.4019	24.2324	24.4043	24.0349	23.7284	23.9575	23.4019	24.2317	23.7137	0.00762998	0.011783	-0.518021	0.0244269	1.61213	0.0827282	1.08235
A0A0H3C6M2	A0A0H3C6M2_CAUVN			Ice nucleation protein	0.000348797	3	2	2	2	3	3	3							21.1242	21.0774	21.4476	22.9118	23.1877	22.7362	21.1242	21.0774	21.4476	22.9118	23.1877	22.7362	21.226	22.9573	0.0095014	0.00992078	1.73129	6.20736e-05	4.20709	0.00260451	2.58427
A0A0H3C6M3	A0A0H3C6M3_CAUVN			2-dehydro-3-deoxygalactonokinase	0.000348797	6	4	6	6	6	5	5							20.9475	21.5104	20.945	21.803	21.2039	21.2411	20.9475	21.5104	20.945	21.803	21.2039	21.2411	21.1597	21.4431	0.0154116	0.015672	0.283336	0.280824	0.551565	0.41546	0.38147
A0A0H3C6M4	A0A0H3C6M4_CAUVN			Erythromycin esterase family protein	0.000348797	12	12	11	11	10	10	10							24.3521	24.4794	24.4028	23.9793	24.0251	24.0857	24.3521	24.4794	24.4028	23.9793	24.0251	24.0857	24.4124	24.0307	0.00262409	0.00222079	-0.381697	0.00097232	3.01219	0.0112521	1.94877
A0A0H3C6M5	A0A0H3C6M5_CAUVN			Alpha/beta hydrolase superfamily protein	0.000348797	6	6	6	5	5	5	6							23.1298	22.6709	22.2588	22.635	22.8312	23.3566	23.1298	22.6709	22.2588	22.635	22.8312	23.3566	22.7303	22.974	0.0192044	0.0162652	0.243762	0.412962	0.38409	0.539365	0.268117
A0A0H3C6M6	A0A0H3C6M6_CAUVN			LysR-family transcriptional regulator	0.000348797	4	3	3	3	3	4	4							22.0452	21.7621	21.6355	21.4262	21.7929	21.8107	22.0452	21.7621	21.6355	21.4262	21.7929	21.8107	21.8246	21.6871	0.00961564	0.0100121	-0.137461	0.412814	0.384246	0.539365	0.268117
A0A0H3C6M7	A0A0H3C6M7_CAUVN			Phospho-2-dehydro-3-deoxyheptonate aldolase	0.000348797	18	18	17	17	15	16	17							25.5444	25.5231	25.6829	25.3033	25.1683	25.3005	25.5444	25.5231	25.6829	25.3033	25.1683	25.3005	25.5852	25.2587	0.00339195	0.00305502	-0.326542	0.00489885	2.30991	0.0283514	1.54743
A0A0H3C6M8	A0A0H3C6M8_CAUVN			Alpha-glucosidase	0.000348797	7	7	6	6	4	6	5							23.2412	23.1357	23.0895	22.6061	22.676	22.3922	23.2412	23.1357	23.0895	22.6061	22.676	22.3922	23.1568	22.5631	0.00335931	0.00655526	-0.593791	0.00098402	3.007	0.0112521	1.94877
A0A0H3C6N0	A0A0H3C6N0_CAUVN			Molybdenum cofactor sulfurase related protein	0.000348797	11	10	11	10	10	8	8							24.1248	24.0992	24.2119	24.2974	23.9971	24.1638	24.1248	24.0992	24.2119	24.2974	23.9971	24.1638	24.1461	24.1579	0.00244654	0.00622855	0.0118218	0.937566	0.0279982	0.957534	0.0188456
A0A0H3C6N1	A0A0H3C6N1_CAUVN			Ornithine decarboxylase	0.000348797	14	14	14	14	13	14	14							24.4276	24.3435	24.283	24.3358	24.2218	24.403	24.4276	24.3435	24.283	24.3358	24.2218	24.403	24.3526	24.3221	0.00298272	0.00376805	-0.0304462	0.680992	0.166858	0.768788	0.114194
A0A0H3C6N2	A0A0H3C6N2_CAUVN			Endo-beta-mannanase	0.000348797	3	3	3	3	3	3	2							21.5501	21.7427	21.4795	20.6356	21.0948	20.1076	21.5501	21.7427	21.4795	20.6356	21.0948	20.1076	21.5951	20.6681	0.00631087	0.0239647	-0.927034	0.0107391	1.96903	0.0475385	1.32295
A0A0H3C6N3	A0A0H3C6N3_CAUVN			Cytochrome cbb3 oxidase, cytochrome c subunit ccoO	0.000348797	7	7	7	6	3	3	4							24.3248	24.4078	23.5071	22.9727	22.527	22.6851	24.3248	24.4078	23.5071	22.9727	22.527	22.6851	24.133	22.7402	0.0206739	0.00994233	-1.39283	0.00344254	2.46312	0.0230597	1.63715
A0A0H3C6N4	A0A0H3C6N4_CAUVN			Chorismate mutase	0.000348797	11	8	9	6	8	9	10							25.989	26.0683	25.8191	26.2652	26.3303	26.3699	25.989	26.0683	25.8191	26.2652	26.3303	26.3699	25.9625	26.3225	0.00490518	0.00200802	0.359929	0.0051328	2.28965	0.0290923	1.53622
A0A0H3C6N5	A0A0H3C6N5_CAUVN			DUF4167 domain-containing protein	0.000348797	20	19	19	19	19	19	19							27.4022	27.3562	27.3465	27.578	27.5136	27.6296	27.4022	27.3562	27.3465	27.578	27.5136	27.6296	27.3685	27.5745	0.00108757	0.00210839	0.205967	0.0102253	1.99032	0.0461743	1.3356
A0A0H3C6N6	A0A0H3C6N6_CAUVN			ATP synthase subunit b	0.000348797	27	27	27	27	27	26	27							28.9335	28.8736	28.8663	29.0431	29.0761	29.117	28.9335	28.8736	28.8663	29.0431	29.0761	29.117	28.8914	29.079	0.00127525	0.00127259	0.187603	0.0110911	1.95502	0.04828	1.31623
A0A0H3C6N8	A0A0H3C6N8_CAUVN			Uncharacterized protein	0.000348797	11	11	11	11	11	11	11							27.3608	27.3374	27.3532	27.445	27.2868	27.4927	27.3608	27.3374	27.3532	27.445	27.2868	27.4927	27.3505	27.4108	0.000435097	0.0039331	0.0603105	0.434816	0.361694	0.559208	0.252427
A0A0H3C6N9	A0A0H3C6N9_CAUVN			Uncharacterized protein	0.000348797	2	2	2	2	2	2	2							22.2305	22.4322	22.4972	22.7729	22.551	22.7263	22.2305	22.4322	22.4972	22.7729	22.551	22.7263	22.391	22.6865	0.00621191	0.00515849	0.295441	0.0276577	1.55818	0.0887926	1.05162
A0A0H3C6P0	A0A0H3C6P0_CAUVN			E1-E2 cation pump ATPase fixI	0.000348797	3	3	3	3	1	0	1							20.7585	20.7806	20.1631	18.053	NA	19.7538	20.7585	20.7806	20.1631	18.053	19.5806	19.7538	20.5943	19.3027	0.0170307	0.0489284	-1.29158	0.0307206	1.51257	0.0951865	1.02142
A0A0H3C6P1	A0A0H3C6P1_CAUVN			Cytokinin riboside 5'-monophosphate phosphoribohydrolase	0.000348797	7	6	7	7	6	5	6							23.6875	23.6486	23.2552	23.2338	23.0892	23.4313	23.6875	23.6486	23.2552	23.2338	23.0892	23.4313	23.5432	23.2583	0.0101639	0.00738602	-0.28491	0.120771	0.918037	0.234028	0.630733
A0A0H3C6P2	A0A0H3C6P2_CAUVN			Uncharacterized protein	0.000348797	14	14	14	14	13	14	13							27.3862	27.367	27.478	27.823	27.4976	27.716	27.3862	27.367	27.478	27.823	27.4976	27.716	27.4112	27.6852	0.00216364	0.00599208	0.273962	0.0360026	1.44367	0.10438	0.981383
A0A0H3C6P3	A0A0H3C6P3_CAUVN			TonB-dependent receptor	0.000348797	62	62	60	58	57	58	59							28.8045	28.7409	28.4382	28.2867	28.2814	28.4206	28.8045	28.7409	28.4382	28.2867	28.2814	28.4206	28.6698	28.331	0.00682972	0.00278406	-0.338831	0.0290994	1.53612	0.0916678	1.03778
A0A0H3C6P4	A0A0H3C6P4_CAUVN			Riboflavin synthase alpha chain	0.000348797	17	17	17	16	17	17	17							29.9589	29.9916	29.7386	30.1118	30.128	29.9054	29.9589	29.9916	29.7386	30.1118	30.128	29.9054	29.9007	30.0519	0.00460362	0.00413074	0.151248	0.188239	0.725291	0.31445	0.502448
A0A0H3C6P5	A0A0H3C6P5_CAUVN			Zinc dependent phospholipase C/S1-P1 nuclease-family protein	0.000348797	20	20	20	20	19	20	20							28.1127	28.0369	28.2145	28.2102	28.13	28.1358	28.1127	28.0369	28.2145	28.2102	28.13	28.1358	28.1232	28.1592	0.00316918	0.0015884	0.0359645	0.589229	0.229716	0.695608	0.157636
A0A0H3C6P6	A0A0H3C6P6_CAUVN			Adenine DNA glycosylase	0.000348797	5	5	5	5	5	5	5							22.5781	22.3476	22.7668	22.5235	22.5992	22.7093	22.5781	22.3476	22.7668	22.5235	22.5992	22.7093	22.5743	22.6127	0.00930329	0.00413333	0.0384256	0.716148	0.144997	0.793357	0.100532
A0A0H3C6P7	A0A0H3C6P7_CAUVN			CRP-family transcription regulator	0.000348797	15	13	14	12	13	14	15							24.9416	24.9281	24.9818	25.095	25.0727	25.0203	24.9416	24.9281	24.9818	25.095	25.0727	25.0203	24.9507	25.063	0.00112049	0.0015287	0.112328	0.0645476	1.19012	0.153803	0.813035
A0A0H3C6P8	A0A0H3C6P8_CAUVN			Xylonolactonase xylC	0.000348797	20	20	20	19	20	20	18							28.6449	28.7073	28.6922	29.1001	28.9807	28.9796	28.6449	28.7073	28.6922	29.1001	28.9807	28.9796	28.6817	29.0212	0.00113606	0.00238616	0.339515	0.00142763	2.84538	0.0141086	1.85052
A0A0H3C6Q0	A0A0H3C6Q0_CAUVN			FecR family protein	0.000348797	16	14	14	13	13	14	14							24.3359	24.3299	24.3012	24.9676	24.9492	24.6172	24.3359	24.3299	24.3012	24.9676	24.9492	24.6172	24.3224	24.8534	0.000763121	0.00793835	0.530996	0.00359358	2.44447	0.0237323	1.62466
A0A0H3C6Q1	A0A0H3C6Q1_CAUVN			Uncharacterized protein	0.000348797	6	2	3	3	3	2	3							19.5754	20.6364	19.6281	20.5353	18.4606	20.4525	19.5754	20.6364	19.6281	20.5353	18.4606	20.4525	20.0343	20.0757	0.0299791	0.0592788	0.041395	0.84906	0.0710616	0.894042	0.0486421
A0A0H3C6Q2	A0A0H3C6Q2_CAUVN			Esterase lipase Family protein	0.000348797	14	8	9	13	7	3	6							23.656	23.6465	25.1514	22.7989	21.4335	23.5349	23.656	23.6465	25.1514	22.7989	21.4335	23.5349	24.338	22.8245	0.0358631	0.0472044	-1.51345	0.066152	1.17946	0.155715	0.80767
A0A0H3C6Q6	A0A0H3C6Q6_CAUVN			Amylosucrase SucB	0.000348797	4	3	3	2	2	1	1							20.0416	19.0972	19.8034	19.745	19.1918	18.2862	20.0416	19.0972	19.8034	19.745	19.1918	18.2862	19.7	19.1924	0.0249981	0.0386094	-0.507608	0.245401	0.610123	0.379405	0.420897
A0A0H3C6Q7	A0A0H3C6Q7_CAUVN			RNA polymerase sigma factor	0.0010142	1	1	1	1	1	1	1							18.9511	19.0686	19.118	19.0866	19.226	19.0998	18.9511	19.0686	19.118	19.0866	19.226	19.0998	19.0475	19.1388	0.00450107	0.00401998	0.091278	0.249739	0.602514	0.384145	0.415504
A0A0H3C6Q8	A0A0H3C6Q8_CAUVN			Uncharacterized protein	0.000348797	2	2	2	2	2	2	2							21.3349	21.6255	21.7371	20.4384	21.5578	21.2941	21.3349	21.6255	21.7371	20.4384	21.5578	21.2941	21.5756	21.1703	0.00962968	0.0277392	-0.405324	0.186385	0.729589	0.312643	0.504952
A0A0H3C6Q9	A0A0H3C6Q9_CAUVN			Alpha-L-arabinofuranosidase	0.000348797	12	12	12	12	10	12	12							25.9541	25.82	25.9129	25.757	25.3516	25.5511	25.9541	25.82	25.9129	25.757	25.3516	25.5511	25.8967	25.5627	0.00265389	0.00793133	-0.334033	0.0270681	1.56754	0.0878332	1.05634
A0A0H3C6R0	A0A0H3C6R0_CAUVN			Uncharacterized protein	0.000348797	39	36	39	38	38	36	36							30.4287	30.4172	30.4714	30.4094	30.1519	30.1812	30.4287	30.4172	30.4714	30.4094	30.1519	30.1812	30.4393	30.2522	0.00093816	0.004661	-0.187112	0.0646064	1.18972	0.153803	0.813035
A0A0H3C6R1	A0A0H3C6R1_CAUVN			Aspartokinase	0.000348797	40	40	39	36	38	38	40							30.215	30.2041	30.2418	30.5142	30.4961	30.5592	30.215	30.2041	30.2418	30.5142	30.4961	30.5592	30.2204	30.5234	0.000641075	0.00106381	0.303011	0.00091177	3.04011	0.0109982	1.95868
A0A0H3C6R2	A0A0H3C6R2_CAUVN			dTDP-4-dehydrorhamnose reductase	0.000348797	5	4	5	5	5	5	5							24.1745	24.2264	24.2786	24.512	24.4452	24.4841	24.1745	24.2264	24.2786	24.512	24.4452	24.4841	24.2271	24.4807	0.00214811	0.00137198	0.253573	0.00373007	2.42828	0.024073	1.61847
A0A0H3C6R5	A0A0H3C6R5_CAUVN			Short chain dehydrogenase	0.000348797	20	19	20	20	14	13	15							26.0025	26.1616	25.9497	24.8892	24.8352	24.9945	26.0025	26.1616	25.9497	24.8892	24.8352	24.9945	26.0408	24.9078	0.00423599	0.00325384	-1.13295	1.68355e-05	4.77377	0.00145314	2.83769
A0A0H3C6R6	A0A0H3C6R6_CAUVN			Cyclopropane-fatty-acyl-phospholipid synthase	0.000348797	9	8	9	9	8	9	9							24.2184	24.1312	24.1856	24.1225	24.3657	24.0448	24.2184	24.1312	24.1856	24.1225	24.3657	24.0448	24.1789	24.1842	0.0018214	0.00692333	0.0053709	0.993953	0.00263409	0.994612	0.00234648
A0A0H3C6R7	A0A0H3C6R7_CAUVN			Flagellar M-ring protein	0.000348797	22	21	21	21	19	19	20							25.7054	26.0312	26.0017	25.8095	25.2375	25.3379	25.7054	26.0312	26.0017	25.8095	25.2375	25.3379	25.9201	25.4839	0.00695408	0.0119951	-0.436207	0.050721	1.29481	0.131188	0.882104
A0A0H3C6R8	A0A0H3C6R8_CAUVN			TonB-dependent receptor	0.000348797	23	17	18	18	16	17	16							25.5592	25.3972	25.3877	25.2673	25.1212	25.22	25.5592	25.3972	25.3877	25.2673	25.1212	25.22	25.4502	25.2041	0.00378658	0.00295714	-0.246066	0.0184185	1.73475	0.0683567	1.16522
A0A0H3C6S0	A0A0H3C6S0_CAUVN			Antiporter protein	0.000348797	4	4	4	3	3	4	4							21.4624	20.9635	21.2464	21.297	21.3487	21.7043	21.4624	20.9635	21.2464	21.297	21.3487	21.7043	21.2384	21.4616	0.0117881	0.0103379	0.223213	0.238995	0.621611	0.371975	0.429486
A0A0H3C6S1	A0A0H3C6S1_CAUVN			Alpha/beta hydrolase family protein	0.000348797	4	4	4	3	3	3	3							22.9781	22.9558	23.0812	22.6684	22.3769	22.5589	22.9781	22.9558	23.0812	22.6684	22.3769	22.5589	23.0061	22.5397	0.00290744	0.00653478	-0.466391	0.00272781	2.56419	0.0197537	1.70435
A0A0H3C6S2	A0A0H3C6S2_CAUVN			Uncharacterized protein	0.000348797	10	10	9	9	8	8	9							23.8273	23.6525	23.4967	23.2695	23.7805	23.5832	23.8273	23.6525	23.4967	23.2695	23.7805	23.5832	23.6652	23.5595	0.00699014	0.0109467	-0.105671	0.497271	0.303407	0.617196	0.209577
A0A0H3C6S3	A0A0H3C6S3_CAUVN			Two-component response regulator	0.000348797	9	9	9	9	9	9	9							23.6577	23.4641	23.6449	23.3384	23.3903	23.3654	23.6577	23.4641	23.6449	23.3384	23.3903	23.3654	23.5916	23.3649	0.00459021	0.00111262	-0.226708	0.0207615	1.68274	0.0745785	1.12739
A0A0H3C6S4	A0A0H3C6S4_CAUVN			Flagellar biosynthesis protein FlhA	0.000348797	11	9	8	10	9	8	10							23.0941	22.9309	23.1411	23.4535	22.9301	23.5154	23.0941	22.9309	23.1411	23.4535	22.9301	23.5154	23.0581	23.3225	0.00478562	0.0138004	0.264373	0.213664	0.670268	0.343523	0.464044
A0A0H3C6S5	A0A0H3C6S5_CAUVN			Uncharacterized protein	0.000348797	5	4	4	5	4	4	3							22.7547	22.6696	23.0732	22.8657	22.7275	22.816	22.7547	22.6696	23.0732	22.8657	22.7275	22.816	22.8432	22.8042	0.00931801	0.00307012	-0.0389534	0.813504	0.0896405	0.866911	0.0620254
A0A0H3C6S6	A0A0H3C6S6_CAUVN			Poly(A) polymerase/tRNA-nucleotidyltransferase	0.000348797	39	39	38	37	36	37	39							28.5161	28.512	28.5531	28.5669	28.5831	28.4206	28.5161	28.512	28.5531	28.5669	28.5831	28.4206	28.5272	28.5253	0.000793911	0.00313872	-0.00187227	0.956251	0.019428	0.970711	0.0129102
A0A0H3C6S8	A0A0H3C6S8_CAUVN			YjgP/YjgQ family membrane permease	0.000348797	13	13	13	12	12	12	13							24.7114	24.6001	24.6187	24.3976	24.4372	24.7433	24.7114	24.6001	24.6187	24.3976	24.4372	24.7433	24.6442	24.5345	0.00242015	0.00771443	-0.10974	0.31879	0.496496	0.454061	0.342886
A0A0H3C6S9	A0A0H3C6S9_CAUVN			Uncharacterized protein	0.000348797	8	8	8	8	7	8	8							27.0279	27.0485	27.0946	27.2576	26.9116	26.907	27.0279	27.0485	27.0946	27.2576	26.9116	26.907	27.0573	27.035	0.00126339	0.00744238	-0.0222777	0.783756	0.105819	0.845314	0.072982
A0A0H3C6T0	A0A0H3C6T0_CAUVN			Toxin	0.00914734	1	1	1	1	1	1	1							19.4255	19.5614	20.0345	20.4071	20.0598	20.3486	19.4255	19.5614	20.0345	20.4071	20.0598	20.3486	19.6981	20.2796	0.0162485	0.00917188	0.581516	0.0217578	1.66238	0.0763419	1.11724
A0A0H3C6T1	A0A0H3C6T1_CAUVN			MarR-family transcriptional regulator	0.000348797	7	7	7	5	5	5	5							22.0337	21.8779	21.7816	21.3932	21.5641	21.6037	22.0337	21.8779	21.7816	21.3932	21.5641	21.6037	21.9015	21.5232	0.00580915	0.00519787	-0.378323	0.00855174	2.06795	0.0413307	1.38373
A0A0H3C6T2	A0A0H3C6T2_CAUVN			Putative cytosolic protein	0.000348797	10	9	8	8	10	9	8							23.3096	23.2794	23.3549	23.6627	23.5106	24.0009	23.3096	23.2794	23.3549	23.6627	23.5106	24.0009	23.315	23.7395	0.00162909	0.0105797	0.424579	0.0242405	1.61546	0.0823742	1.08421
A0A0H3C6T3	A0A0H3C6T3_CAUVN			Gluconate kinase	0.000348797	28	27	28	27	25	28	28							27.6245	27.6087	27.5983	27.7749	27.678	27.7794	27.6245	27.6087	27.5983	27.7749	27.678	27.7794	27.6105	27.7449	0.000476871	0.00206454	0.134342	0.0447522	1.34919	0.120603	0.91864
A0A0H3C6T5	A0A0H3C6T5_CAUVN			Zinc metalloprotease	0.000348797	12	10	10	12	10	10	9							25.1608	25.0675	25.5824	25.0564	24.4139	24.3504	25.1608	25.0675	25.5824	25.0564	24.4139	24.3504	25.2881	24.6437	0.0108561	0.0158727	-0.644409	0.0362489	1.44071	0.104893	0.979255
A0A0H3C6T6	A0A0H3C6T6_CAUVN			Putative phosphatase	0.000348797	9	9	9	9	9	9	9							27.2918	27.2266	27.1623	27.3011	27.1345	27.2232	27.2918	27.2266	27.1623	27.3011	27.1345	27.2232	27.2279	27.2212	0.00237917	0.00306115	-0.00668982	0.917294	0.0374913	0.945784	0.0242082
A0A0H3C6T7	A0A0H3C6T7_CAUVN			O-antigen membrane transport protein	0.000348797	6	4	4	5	5	6	6							22.3473	22.0164	22.4544	22.7642	23.1788	22.9691	22.3473	22.0164	22.4544	22.7642	23.1788	22.9691	22.2845	22.9806	0.0102527	0.00902361	0.696128	0.00573153	2.24173	0.0317705	1.49798
A0A0H3C6U0	A0A0H3C6U0_CAUVN			Putative exported protein	0.000348797	11	11	10	11	11	11	11							25.9735	26.0501	26.0021	26.0351	25.9184	25.8395	25.9735	26.0501	26.0021	26.0351	25.9184	25.8395	26.0089	25.9333	0.00148695	0.00379489	-0.0756604	0.297876	0.525965	0.433664	0.362847
A0A0H3C6U1	A0A0H3C6U1_CAUVN	A0A0H3C7X1;A0A0H3C4Q0; A0A0H3C6U1;A0A0H3C7K6; A0A0H3C5N8		Flagellin	NA	10	9	10	10	8	8	9	2	2	2	1	2	2	28.1343	28.2471	28.1496	27.5443	27.3579	27.5136	28.1343	28.2471	28.1496	27.5443	27.3579	27.5136	28.1779	27.4742	0.00217105	0.00363698	-0.703651	0.000115793	3.93632	0.0035695	2.44739
A0A0H3C6U2	A0A0H3C6U2_CAUVN	A0A0H3C6U2;B8GVZ8	fabA;ribA	Multifunctional fusion protein	0.000348797	46	45	46	45	42	44	44	1	1	1	1	1	1	29.7339	29.6969	29.7858	29.7996	29.7788	29.7314	29.7339	29.6969	29.7858	29.7996	29.7788	29.7314	29.7393	29.7702	0.00150172	0.00117578	0.0308983	0.566205	0.247026	0.676624	0.169653
A0A0H3C6U4	A0A0H3C6U4_CAUVN			Regulatory protein flaY	0.000348797	15	9	10	9	7	4	5							23.0977	22.7236	22.9832	22.1008	20.7999	22.066	23.0977	22.7236	22.9832	22.1008	20.7999	22.066	22.9432	21.768	0.00835791	0.0342288	-1.17516	0.0177805	1.75006	0.0669854	1.17402
A0A0H3C6U5	A0A0H3C6U5_CAUVN			tRNA-specific 2-thiouridylase MnmA	0.000348797	23	22	19	21	20	21	19							25.9706	25.6139	25.8611	26.298	26.254	26.2425	25.9706	25.6139	25.8611	26.298	26.254	26.2425	25.8228	26.265	0.00707903	0.00111598	0.442275	0.0054625	2.26261	0.0305597	1.51485
A0A0H3C6U7	A0A0H3C6U7_CAUVN			Fasciclin domain cell surface protein	0.0010142	2	2	2	2	1	1	2							23.1393	23.0748	23.0231	22.772	22.4672	22.1807	23.1393	23.0748	23.0231	22.772	22.4672	22.1807	23.0799	22.4935	0.00252231	0.0131579	-0.586405	0.00961262	2.01716	0.0439766	1.35678
A0A0H3C6U8	A0A0H3C6U8_CAUVN			Basal-body rod modification protein FlgD	0.000348797	9	9	8	5	2	5	7							23.8514	23.8276	23.1822	22.591	22.8805	23.8206	23.8514	23.8276	23.1822	22.591	22.8805	23.8206	23.6518	23.1973	0.016074	0.0278326	-0.454495	0.214187	0.669207	0.343904	0.463563
A0A0H3C6U9	A0A0H3C6U9_CAUVN			Aldehyde dehydrogenase	0.000348797	35	35	35	33	34	34	33							28.016	28.1867	27.9983	28.1446	28.2574	28.15	28.016	28.1867	27.9983	28.1446	28.2574	28.15	28.0696	28.185	0.00370799	0.00225841	0.115402	0.169147	0.771736	0.293337	0.532633
A0A0H3C6V0	A0A0H3C6V0_CAUVN			2-hydroxychromene-2-carboxylate isomerase	0.000348797	10	10	10	10	9	10	10							24.4076	24.3847	24.2899	24.0536	24.0701	24.122	24.4076	24.3847	24.2899	24.0536	24.0701	24.122	24.3616	24.0822	0.00256014	0.0014819	-0.279423	0.00314173	2.50283	0.0217687	1.66217
A0A0H3C6V1	A0A0H3C6V1_CAUVN			Flagellar motor switch protein FliG	0.000348797	7	7	7	7	6	7	7							23.571	23.6322	23.7377	23.0276	23.2034	23.2941	23.571	23.6322	23.7377	23.0276	23.2034	23.2941	23.6486	23.1792	0.00356604	0.00584589	-0.469357	0.00255773	2.59215	0.0189385	1.72265
A0A0H3C6V4	A0A0H3C6V4_CAUVN			AcrR-family transcriptional regulator	0.000348797	7	6	7	6	7	7	6							23.6861	23.7217	23.5836	23.5513	23.4563	23.673	23.6861	23.7217	23.5836	23.5513	23.4563	23.673	23.665	23.563	0.00303162	0.00461048	-0.102044	0.232752	0.633107	0.365459	0.437161
A0A0H3C6V5	A0A0H3C6V5_CAUVN			Porin O	0.000348797	16	16	16	15	13	15	15							25.6447	25.6758	25.755	25.8104	25.8383	25.878	25.6447	25.6758	25.755	25.8104	25.8383	25.878	25.6926	25.8425	0.00221354	0.00131532	0.149912	0.0344971	1.46222	0.101674	0.992791
A0A0H3C6V6	A0A0H3C6V6_CAUVN	A0A0H3C5E5;A0A0H3C535; A0A0H3CD29;A0A0H3C7A0; A0A0H3CBW6;A0A0H3CAJ9; A0A0H3CDC1;A0A0H3C560; A0A0H3CDH1;A0A0H3C6V6; A0A0H3C800;A0A0H3CDH7; A0A0H3C683		Methyl-accepting chemotaxis protein	NA	63	61	60	60	57	55	56	2	2	2	2	2	2	29.0404	29.1888	29.1958	28.7175	28.5461	28.7262	29.0404	29.1888	29.1958	28.7175	28.5461	28.7262	29.1434	28.6656	0.00301123	0.00354381	-0.477825	0.00130052	2.88588	0.0132595	1.87747
A0A0H3C6V7	A0A0H3C6V7_CAUVN			RND family efflux transporter, MFP subunit	0.000348797	10	10	9	10	9	10	10							24.9617	24.7944	24.9194	23.6136	24.0589	24.2539	24.9617	24.7944	24.9194	23.6136	24.0589	24.2539	24.8936	23.9996	0.00349449	0.0136898	-0.894002	0.00250362	2.60143	0.0186752	1.72874
A0A0H3C6V8	A0A0H3C6V8_CAUVN			Two-component response regulator	0.000348797	22	21	19	20	20	20	22							25.2924	25.2587	25.1123	25.3129	25.2228	25.2583	25.2924	25.2587	25.1123	25.3129	25.2228	25.2583	25.2232	25.2651	0.00379642	0.00179642	0.041912	0.545142	0.263491	0.65691	0.182494
A0A0H3C6V9	A0A0H3C6V9_CAUVN			Organic hydroperoxide resistance protein	0.000348797	5	4	5	4	5	5	5							24.4332	23.9887	24.3201	24.6758	24.4704	24.6439	24.4332	23.9887	24.3201	24.6758	24.4704	24.6439	24.2593	24.5995	0.00952677	0.00449502	0.340153	0.0437707	1.35882	0.118381	0.926719
A0A0H3C6W0	A0A0H3C6W0_CAUVN			Chemotaxis protein methyltransferase	0.000348797	23	23	22	23	21	22	23							26.785	26.5775	26.7165	26.1766	26.235	26.0772	26.785	26.5775	26.7165	26.1766	26.235	26.0772	26.6956	26.1644	0.00395998	0.00304894	-0.531175	0.000751705	3.12395	0.0103694	1.98425
A0A0H3C6W1	A0A0H3C6W1_CAUVN			Phosphinothricin N-acetyltransferase	0.000348797	5	5	5	5	5	4	5							22.4602	22.3955	22.4294	22.2179	22.2587	22.3279	22.4602	22.3955	22.4294	22.2179	22.2587	22.3279	22.4286	22.2689	0.0014432	0.00249786	-0.159701	0.0265201	1.57643	0.0868008	1.06148
A0A0H3C6W2	A0A0H3C6W2_CAUVN			23S rRNA methyltransferase	0.000348797	17	16	16	14	15	16	14							25.278	25.3465	25.5116	25.4057	25.4171	25.3805	25.278	25.3465	25.5116	25.4057	25.4171	25.3805	25.3821	25.4012	0.00473173	0.000737312	0.0191077	0.772367	0.112176	0.836515	0.0775262
A0A0H3C6W3	A0A0H3C6W3_CAUVN			Acyl esterase protein	0.000348797	24	24	23	22	22	20	20							25.4845	25.362	25.4893	25.0326	24.9585	24.5712	25.4845	25.362	25.4893	25.0326	24.9585	24.5712	25.4465	24.8678	0.00283533	0.00996932	-0.578659	0.00580711	2.23604	0.0320903	1.49363
A0A0H3C6W4	A0A0H3C6W4_CAUVN			CheE protein	0.000348797	13	11	13	13	13	12	13							25.6892	25.6063	25.6458	25.7279	25.6254	25.6815	25.6892	25.6063	25.6458	25.7279	25.6254	25.6815	25.6475	25.6789	0.00161804	0.00199789	0.0313726	0.584054	0.233547	0.693133	0.159184
A0A0H3C6W6	A0A0H3C6W6_CAUVN			FecCD-family transporter protein	0.00978474	1	1	1	1	1	1	1							18.3091	19.6173	19.952	19.7817	19.6188	19.9715	18.3091	19.6173	19.952	19.7817	19.6188	19.9715	19.4464	19.7979	0.0449999	0.00891802	0.351419	0.305832	0.514516	0.441012	0.35555
A0A0H3C6W7	A0A0H3C6W7_CAUVN			Oxidoreductase, GMC family	0.000348797	4	4	4	4	1	1	1							23.2326	22.843	23.152	21.0508	20.9191	18.5581	23.2326	22.843	23.152	21.0508	20.9191	18.5581	23.0854	20.5297	0.00891346	0.0695228	-2.55574	0.0076263	2.11769	0.0383984	1.41569
A0A0H3C6W8	A0A0H3C6W8_CAUVN			N-acetyl-glucosamine/N-acetyl-chitin oligosaccharide outer membrane transporter nagA	0.000348797	95	22	22	22	95	95	95							24.8841	25.0038	25.4861	32.8068	32.6612	32.7951	24.8841	25.0038	25.4861	32.8068	32.6612	32.7951	25.1489	32.7559	0.0126824	0.00247038	7.60699	3.14911e-08	7.50181	2.24487e-05	4.64881
A0A0H3C6W9	A0A0H3C6W9_CAUVN			Uncharacterized protein	0.000348797	6	6	4	4	5	4	4							22.0414	22.1529	21.9403	22.5849	22.3654	22.4943	22.0414	22.1529	21.9403	22.5849	22.3654	22.4943	22.0475	22.4843	0.00482529	0.00490629	0.436831	0.00317221	2.49864	0.0218795	1.65996
A0A0H3C6X0	A0A0H3C6X0_CAUVN	A0A0H3C6X0;A0A0H3C480	CCNA_00974;pstA	OAR protein	0.000348797	100	98	100	99	90	87	92	1	1	1	1	1	1	32.8156	32.8522	32.985	32.0738	31.9385	32.0961	32.8156	32.8522	32.985	32.0738	31.9385	32.0961	32.8861	32.0378	0.00271056	0.0026612	-0.848336	5.27204e-05	4.27802	0.00244933	2.61095
A0A0H3C6X2	A0A0H3C6X2_CAUVN			PAS-family motility and cell cycle regulatory protein MopJ	0.000348797	6	6	5	6	6	5	5							23.1485	22.8408	23.1638	23.5279	23.3777	23.4747	23.1485	22.8408	23.1638	23.5279	23.3777	23.4747	23.0585	23.4614	0.00790618	0.00324665	0.402918	0.0103461	1.98522	0.0463732	1.33373
A0A0H3C6X3	A0A0H3C6X3_CAUVN			Periplasmic multidrug efflux lipoprotein	0.000348797	26	23	21	22	20	20	23							26.4916	26.6249	26.6535	26.6345	26.5767	26.4874	26.4916	26.6249	26.6535	26.6345	26.5767	26.4874	26.5917	26.5675	0.00325101	0.00278913	-0.0242613	0.748373	0.125882	0.815891	0.0883676
A0A0H3C6X4	A0A0H3C6X4_CAUVN			Chaperone protein dnaK	0.000348797	18	16	17	17	14	15	17							25.6538	25.5729	25.6194	25.4015	25.3345	25.6865	25.6538	25.5729	25.6194	25.4015	25.3345	25.6865	25.6157	25.4824	0.00158594	0.00733719	-0.133365	0.227206	0.64358	0.358802	0.445145
A0A0H3C6X6	A0A0H3C6X6_CAUVN			Sulfate adenylyltransferase subunit 2	0.000348797	29	29	28	28	26	26	29							27.6032	27.525	27.6042	27.6591	27.6535	27.7852	27.6032	27.525	27.6042	27.6591	27.6535	27.7852	27.5779	27.7006	0.00164694	0.00268882	0.122656	0.0958167	1.01856	0.199491	0.700076
A0A0H3C6Y0	A0A0H3C6Y0_CAUVN			Altronate dehydratase	0.000348797	5	5	5	5	1	5	4							22.3778	22.0823	20.919	20.1692	21.2528	21.0264	22.3778	22.0823	20.919	20.1692	21.2528	21.0264	21.9162	20.8861	0.0353877	0.0274566	-1.03018	0.0913309	1.03938	0.194289	0.711552
A0A0H3C6Y1	A0A0H3C6Y1_CAUVN			N-formimino-L-glutamate deiminase	0.000348797	23	12	12	11	8	10	12							24.3827	24.1566	24.1416	23.8408	23.9557	24.2165	24.3827	24.1566	24.1416	23.8408	23.9557	24.2165	24.2312	24.013	0.00557494	0.00802103	-0.218206	0.127621	0.894078	0.242633	0.615051
A0A0H3C6Y2	A0A0H3C6Y2_CAUVN			MarR-family transcriptional regulator	0.000348797	5	5	5	5	4	5	5							23.2104	22.8559	22.8616	22.2504	22.8078	22.8529	23.2104	22.8559	22.8616	22.2504	22.8078	22.8529	22.9857	22.6618	0.00883731	0.0148245	-0.323905	0.144089	0.84137	0.261798	0.582033
A0A0H3C6Y3	A0A0H3C6Y3_CAUVN			Uncharacterized protein	0.000348797	6	6	6	5	5	5	6							23.985	23.9228	23.7963	23.7498	23.6779	23.8448	23.985	23.9228	23.7963	23.7498	23.6779	23.8448	23.9035	23.7592	0.0040228	0.00352397	-0.144353	0.112467	0.948976	0.223303	0.651105
A0A0H3C6Y4	A0A0H3C6Y4_CAUVN			Uncharacterized protein	0.000348797	18	18	17	17	17	17	18							26.9314	26.7967	26.9155	26.7468	26.8171	26.8552	26.9314	26.7967	26.9155	26.7468	26.8171	26.8552	26.8824	26.807	0.00273873	0.00205157	-0.0754113	0.278664	0.554919	0.414101	0.382893
A0A0H3C6Y5	A0A0H3C6Y5_CAUVN			4-hydroxy-2-oxoglutarate aldolase/2-dehydro-3-deoxyphosphogluconate aldolase	0.000348797	34	32	32	31	34	31	31							29.7411	29.6504	29.6574	29.9422	29.9649	30.0507	29.7411	29.6504	29.6574	29.9422	29.9649	30.0507	29.6836	29.9867	0.00170108	0.00190883	0.303147	0.00240794	2.61835	0.0184391	1.73426
A0A0H3C6Y6	A0A0H3C6Y6_CAUVN			Acyl-CoA synthetase	0.000348797	7	7	7	7	3	3	4							25.3123	25.1267	24.9522	23.7744	23.6586	23.3574	25.3123	25.1267	24.9522	23.7744	23.6586	23.3574	25.1379	23.6073	0.00716521	0.00912215	-1.53065	7.89596e-05	4.10259	0.00291707	2.53505
A0A0H3C6Y7	A0A0H3C6Y7_CAUVN			Zn-dependent hydrolase, glyoxalase II family	0.000348797	19	18	19	17	17	18	18							27.8188	27.8857	27.7777	28.0471	27.8701	28.0104	27.8188	27.8857	27.7777	28.0471	27.8701	28.0104	27.8281	27.9778	0.00195845	0.00333767	0.149774	0.0773917	1.11131	0.173959	0.759554
A0A0H3C6Y8	A0A0H3C6Y8_CAUVN			NADP-dependent aldose oxidoreductase	0.000348797	3	3	3	2	1	2	2							20.6442	21.2808	20.8679	18.2442	19.8906	19.9055	20.6442	21.2808	20.8679	18.2442	19.8906	19.9055	20.9555	19.5258	0.01543	0.0493557	-1.42965	0.022249	1.65269	0.077512	1.11063
A0A0H3C6Y9	A0A0H3C6Y9_CAUVN			Tryptophan halogenase superfamily protein	0.000348797	4	4	4	4	2	2	1							21.7839	21.9597	21.2445	19.9169	20.0091	18.0028	21.7839	21.9597	21.2445	19.9169	20.0091	18.0028	21.6934	19.5531	0.0172029	0.0586576	-2.14036	0.00891203	2.05002	0.042174	1.37496
A0A0H3C6Z2	A0A0H3C6Z2_CAUVN			Bcr/CflA family efflux transporter	0.000348797	5	5	5	5	4	5	4							22.2772	22.4283	22.7325	22.9498	22.958	22.7646	22.2772	22.4283	22.7325	22.9498	22.958	22.7646	22.4919	22.8935	0.0103166	0.00477692	0.401547	0.0247578	1.60629	0.0833816	1.07893
A0A0H3C6Z4	A0A0H3C6Z4_CAUVN			Arsenic resistance protein arsH	0.000348797	12	12	12	12	10	11	12							24.8098	24.7596	24.5977	24.7075	24.9416	24.9539	24.8098	24.7596	24.5977	24.7075	24.9416	24.9539	24.7252	24.872	0.00448457	0.00558387	0.14685	0.192394	0.715808	0.318827	0.496444
A0A0H3C6Z5	A0A0H3C6Z5_CAUVN			Putative rhamnosyl transferase	0.000348797	10	8	8	8	7	9	8							24.6245	24.6974	24.5979	24.8908	24.6924	24.9428	24.6245	24.6974	24.5979	24.8908	24.6924	24.9428	24.6405	24.8459	0.00209135	0.00531923	0.205398	0.0530947	1.27495	0.134903	0.86998
A0A0H3C6Z6	A0A0H3C6Z6_CAUVN			L,D-transpeptidase LdtD	0.000348797	24	24	24	24	23	23	22							26.5679	26.5283	26.6236	26.1268	26.198	25.7932	26.5679	26.5283	26.6236	26.1268	26.198	25.7932	26.5738	26.0498	0.00180228	0.00829878	-0.523984	0.00499353	2.30159	0.0285709	1.54408
A0A0H3C6Z8	A0A0H3C6Z8_CAUVN			RNA polymerase ECF-type sigma factor	0.000348797	3	3	3	3	3	3	3							22.6596	22.7129	22.4344	22.7484	22.7086	22.586	22.6596	22.7129	22.4344	22.7484	22.7086	22.586	22.6073	22.6827	0.00653886	0.00373219	0.0754192	0.439314	0.357225	0.562121	0.250171
A0A0H3C700	A0A0H3C700_CAUVN			Glycosyl transferase family protein	0.000348797	11	10	11	10	9	9	10							25.8071	25.8214	25.8576	25.7986	25.9087	25.7741	25.8071	25.8214	25.8576	25.7986	25.9087	25.7741	25.8288	25.8283	0.00100746	0.0027756	-0.000490938	0.979463	0.00901198	0.985006	0.00656118
A0A0H3C701	A0A0H3C701_CAUVN			Penicillin-insensitive transglycosylase	0.000348797	32	31	30	31	31	29	31							27.749	27.7596	27.9159	28.0028	27.9736	27.8381	27.749	27.7596	27.9159	28.0028	27.9736	27.8381	27.8102	27.9399	0.00336038	0.00314456	0.129749	0.14466	0.839652	0.262631	0.580654
A0A0H3C702	A0A0H3C702_CAUVN			GntR-family transcriptional regulator	0.000348797	9	8	9	9	7	9	9							24.228	24.2028	24.1936	24.143	24.2378	24.1372	24.228	24.2028	24.1936	24.143	24.2378	24.1372	24.2082	24.1734	0.000734286	0.00233599	-0.0348136	0.519855	0.284117	0.636081	0.196488
A0A0H3C704	A0A0H3C704_CAUVN			Cytochrome c1	0.000348797	29	27	26	27	27	27	28							29.1386	29.1026	29.1269	28.8725	29.1473	29.1973	29.1386	29.1026	29.1269	28.8725	29.1473	29.1973	29.1228	29.0793	0.000629313	0.00601437	-0.0435056	0.62366	0.205052	0.725482	0.139373
A0A0H3C705	A0A0H3C705_CAUVN			TonB-dependent receptor	0.000348797	42	42	41	38	35	35	35							29.5658	29.6503	29.4257	28.3263	28.2363	28.3035	29.5658	29.6503	29.4257	28.3263	28.2363	28.3035	29.5502	28.2892	0.00383941	0.00165362	-1.26099	6.36741e-06	5.19604	0.000956808	3.01918
A0A0H3C707	A0A0H3C707_CAUVN			DUF2807 domain-containing protein	0.000348797	18	18	18	18	18	18	18							28.2538	28.1866	28.014	28.1361	28.2779	28.3556	28.2538	28.1866	28.014	28.1361	28.2779	28.3556	28.155	28.2594	0.00439317	0.0039381	0.104396	0.304369	0.5166	0.440373	0.356179
A0A0H3C709	A0A0H3C709_CAUVN			Ribosome-binding ATPase YchF	0.000348797	27	27	27	26	26	26	26							28.1227	28.056	28.0633	28.1254	28.1097	28.2218	28.1227	28.056	28.0633	28.1254	28.1097	28.2218	28.081	28.1532	0.00130231	0.00215638	0.0721765	0.245819	0.609384	0.379857	0.42038
A0A0H3C710	A0A0H3C710_CAUVN			Protein translocase subunit SecY	0.000348797	15	14	13	13	12	13	13							26.3887	26.2888	26.4853	26.5717	26.5043	26.738	26.3887	26.2888	26.4853	26.5717	26.5043	26.738	26.3898	26.6081	0.00372456	0.00452109	0.218239	0.0524703	1.28009	0.133992	0.872921
A0A0H3C711	A0A0H3C711_CAUVN			Methane oxygenase, PmoA family	0.000348797	9	8	8	9	7	7	8							23.5601	23.3265	23.3859	22.7863	22.6209	22.703	23.5601	23.3265	23.3859	22.7863	22.6209	22.703	23.4276	22.705	0.00518363	0.00364166	-0.722633	0.000233716	3.63131	0.00550635	2.25914
A0A0H3C712	A0A0H3C712_CAUVN			Antitoxin protein	0.00235452	1	1	1	1	1	1	1							20.2411	18.9373	19.9764	21.3335	20.6814	21.6121	20.2411	18.9373	19.9764	21.3335	20.6814	21.6121	19.818	21.2592	0.0349502	0.0225215	1.44116	0.0138573	1.85832	0.0564953	1.24799
A0A0H3C713	A0A0H3C713_CAUVN			GMC family oxidoreductase	0.000348797	3	3	3	3	3	3	3							24.5749	24.595	24.8381	23.4685	25.2878	25.1179	24.5749	24.595	24.8381	23.4685	25.2878	25.1179	24.6744	24.822	0.00593874	0.0408091	0.147624	0.932678	0.0302682	0.954249	0.0203382
A0A0H3C714	A0A0H3C714_CAUVN			NADPH-dependent FMN reductase family protein	0.000348797	6	6	6	6	6	6	6							23.816	23.7979	23.7989	23.3578	23.619	23.5913	23.816	23.7979	23.7989	23.3578	23.619	23.5913	23.8043	23.5274	0.000428049	0.00609895	-0.276932	0.016936	1.77119	0.0650741	1.18659
A0A0H3C716	A0A0H3C716_CAUVN			Uncharacterized protein	0.000348797	3	2	1	2	0	1	3							18.0563	15.9764	16.1948	NA	14.9835	18.4445	18.0563	15.9764	16.1948	18.9964	14.9835	18.4445	17.0675	18.2139	0.0682702	0.124469	1.14638	0.571544	0.24295	0.681638	0.166446
A0A0H3C717	A0A0H3C717_CAUVN			Transporter, drug/metabolite exporter family	0.00332889	1	1	1	1	1	1	1							20.5722	20.2559	20.2482	20.0966	20.2391	20.244	20.5722	20.2559	20.2482	20.0966	20.2391	20.244	20.3668	20.1949	0.00908025	0.00414531	-0.171963	0.184942	0.732964	0.310643	0.507738
A0A0H3C718	A0A0H3C718_CAUVN			SapC family protein	0.00332889	1	1	1	1	1	1	1							20.2196	20.1683	20.1071	19.7309	19.9793	19.0538	20.2196	20.1683	20.1071	19.7309	19.9793	19.0538	20.1657	19.6382	0.0027931	0.0244542	-0.527543	0.0590945	1.22845	0.146212	0.835018
A0A0H3C719	A0A0H3C719_CAUVN			Replication-associated recombination protein A	0.000348797	12	12	12	11	12	11	11							24.6894	24.6646	24.7178	24.8535	24.6541	24.6843	24.6894	24.6646	24.7178	24.8535	24.6541	24.6843	24.6908	24.7333	0.0010768	0.00434442	0.0425686	0.586681	0.231598	0.69458	0.158278
A0A0H3C720	A0A0H3C720_CAUVN			Uncharacterized protein	0.000348797	12	12	12	12	11	12	12							25.4565	25.4735	25.5152	25.3215	25.2757	25.1664	25.4565	25.4735	25.5152	25.3215	25.2757	25.1664	25.4819	25.256	0.00118545	0.00315489	-0.22594	0.0108266	1.96551	0.0475915	1.32247
A0A0H3C722	A0A0H3C722_CAUVN			Uncharacterized protein	0.000348797	4	2	2	3	3	3	3							19.336	18.9688	19.7915	19.7157	20.2217	19.0569	19.336	18.9688	19.7915	19.7157	20.2217	19.0569	19.4048	19.7412	0.0212829	0.0297008	0.336441	0.436236	0.360278	0.559367	0.252303
A0A0H3C723	A0A0H3C723_CAUVN			Uncharacterized protein	0.000348797	15	15	15	15	15	14	14							26.3635	26.3877	26.3204	26.4742	26.2011	26.2722	26.3635	26.3877	26.3204	26.4742	26.2011	26.2722	26.3575	26.3205	0.0012933	0.00538348	-0.0369669	0.640232	0.193662	0.73755	0.132208
A0A0H3C724	A0A0H3C724_CAUVN			Protease II PtrB	0.000348797	55	54	54	55	52	54	54							28.6635	28.6393	28.7777	28.597	28.6628	28.651	28.6635	28.6393	28.7777	28.597	28.6628	28.651	28.6948	28.6372	0.00257509	0.00122586	-0.0575433	0.375991	0.424823	0.508674	0.293561
A0A0H3C726	A0A0H3C726_CAUVN			GDP-mannose 4,6-dehydratase	0.000348797	14	14	13	13	11	14	14							26.7925	26.7335	26.7919	26.8678	26.917	26.9192	26.7925	26.7335	26.7919	26.8678	26.917	26.9192	26.7729	26.9015	0.0012649	0.00108037	0.128627	0.039805	1.40006	0.111102	0.954276
A0A0H3C727	A0A0H3C727_CAUVN			Phosphohydrolase, MutT/nudix family	0.000348797	9	9	9	8	8	8	9							24.1236	23.991	24.3841	24.0488	24.2016	24.0887	24.1236	23.991	24.3841	24.0488	24.2016	24.0887	24.1756	24.1145	0.0082769	0.00328735	-0.0610793	0.660731	0.179975	0.752923	0.123249
A0A0H3C728	A0A0H3C728_CAUVN			Histidine kinase	0.000348797	31	30	31	29	29	30	31							27.0181	27.5825	26.9981	27.0527	27.0282	27.1679	27.0181	27.5825	26.9981	27.0527	27.0282	27.1679	27.226	27.0842	0.0121975	0.00275525	-0.141758	0.52917	0.276405	0.644605	0.190706
A0A0H3C729	A0A0H3C729_CAUVN			General stress protein 17O	0.000348797	3	1	0	2	1	0	2							19.3387	NA	18.6316	15.7784	NA	19.1788	19.3387	19.5187	18.6316	15.7784	20.4326	19.1788	19.2108	19.3927	0.0244705	0.130432	0.181857	0.587713	0.230835	0.695449	0.157735
A0A0H3C730	A0A0H3C730_CAUVN			Uncharacterized protein	0.000348797	5	4	4	5	3	5	4							21.463	21.6824	21.6494	21.3997	21.7488	21.7369	21.463	21.6824	21.6494	21.3997	21.7488	21.7369	21.6015	21.6373	0.00547784	0.00916486	0.0358211	0.813536	0.0896231	0.866911	0.0620254
A0A0H3C731	A0A0H3C731_CAUVN			Type I secretion outer membrane protein RsaFa	0.000348797	27	27	27	27	27	27	27							27.3686	27.3537	27.3296	27.6155	27.5214	27.5292	27.3686	27.3537	27.3296	27.6155	27.5214	27.5292	27.3507	27.556	0.000719787	0.00189534	0.205277	0.00832344	2.0797	0.0408828	1.38846
A0A0H3C732	A0A0H3C732_CAUVN			Arylamine N-acetyltransferase	0.000348797	13	13	13	12	12	12	12							25.079	25.0556	24.9736	25.2425	25.2178	25.1603	25.079	25.0556	24.9736	25.2425	25.2178	25.1603	25.0367	25.2073	0.00221028	0.00167396	0.170548	0.023314	1.63238	0.080036	1.09671
A0A0H3C733	A0A0H3C733_CAUVN			Cytochrome P450 CypX	0.000348797	23	23	22	22	20	22	21							26.4333	26.2711	26.2667	26.0833	26.0881	26.1095	26.4333	26.2711	26.2667	26.0833	26.0881	26.1095	26.3258	26.0937	0.00360681	0.00053302	-0.232103	0.0132845	1.87665	0.0546021	1.26279
A0A0H3C734	A0A0H3C734_CAUVN			Uncharacterized protein	0.000348797	4	4	3	2	2	2	3							22.6632	21.6246	21.1479	20.6755	21.0074	22.0406	22.6632	21.6246	21.1479	20.6755	21.0074	22.0406	21.9553	21.3639	0.035523	0.0335161	-0.591393	0.320732	0.493858	0.455625	0.341392
A0A0H3C735	A0A0H3C735_CAUVN			Myo-inositol catabolism protein IolD	0.000348797	19	9	11	10	9	8	6							23.4637	23.3964	23.3663	23.0234	23.0862	22.8882	23.4637	23.3964	23.3663	23.0234	23.0862	22.8882	23.4093	23.0016	0.00213034	0.00439893	-0.407731	0.00156541	2.80537	0.014596	1.83577
A0A0H3C737	A0A0H3C737_CAUVN			Quinone oxidoreductase	0.000348797	12	11	12	11	11	11	8							24.2372	24.1105	23.8671	23.6356	23.4045	23.1468	24.2372	24.1105	23.8671	23.6356	23.4045	23.1468	24.0796	23.4094	0.00781523	0.01045	-0.670277	0.0066016	2.18035	0.0346843	1.45987
A0A0H3C739	A0A0H3C739_CAUVN			Choline phosphatase	0.000348797	8	8	8	8	8	8	8							23.4793	23.325	23.346	23.3431	23.4986	23.227	23.4793	23.325	23.346	23.3431	23.4986	23.227	23.3851	23.3605	0.00358099	0.00583485	-0.0245407	0.773229	0.111692	0.836515	0.0775262
A0A0H3C740	A0A0H3C740_CAUVN			Two-component response regulator	0.000348797	10	9	10	8	8	9	9							24.1729	25.8255	23.8971	23.3806	23.1784	23.7241	24.1729	25.8255	23.8971	23.3806	23.1784	23.7241	24.9011	23.4455	0.04234	0.0117762	-1.4556	0.0701767	1.15381	0.161673	0.791361
A0A0H3C741	A0A0H3C741_CAUVN			Penicillin acylase	0.000348797	6	6	6	6	0	1	2							22.0995	22.2998	21.6463	NA	15.7801	19.702	22.0995	22.2998	21.6463	19.9682	15.7801	19.702	22.0403	19.2988	0.0152074	0.126867	-2.74149	0.0267481	1.57271	0.0872635	1.05917
A0A0H3C742	A0A0H3C742_CAUVN			Adenosylmethionine-8-amino-7-oxononanoate aminotransferase	0.000348797	12	12	12	10	11	12	11							25.0116	25.0132	24.9744	25.0143	24.9216	25.0551	25.0116	25.0132	24.9744	25.0143	24.9216	25.0551	24.9999	24.9981	0.00087762	0.00273754	-0.00179228	0.962082	0.0167879	0.973359	0.011727
A0A0H3C743	A0A0H3C743_CAUVN			Flagellar basal-body rod protein FlgC	0.000348797	8	7	6	7	7	7	8							23.1987	22.7076	23.1354	23.2037	23.4427	23.3472	23.1987	22.7076	23.1354	23.2037	23.4427	23.3472	23.0298	23.3345	0.0116071	0.00515637	0.304728	0.0852588	1.06926	0.1853	0.732125
A0A0H3C744	A0A0H3C744_CAUVN			DHOdehase	0.000348797	18	17	16	17	16	18	17							26.252	26.1691	26.2664	26.2072	26.2361	26.3376	26.252	26.1691	26.2664	26.2072	26.2361	26.3376	26.2298	26.2614	0.00200134	0.00260719	0.0315639	0.625821	0.20355	0.726597	0.138706
A0A0H3C745	A0A0H3C745_CAUVN			Nicotinate-nucleotide--dimethylbenzimidazole phosphoribosyltransferase	0.000348797	14	14	13	13	13	12	14							25.8017	25.6166	25.7539	25.6973	25.7044	25.9262	25.8017	25.6166	25.7539	25.6973	25.7044	25.9262	25.7262	25.78	0.00373653	0.00504933	0.0537725	0.589767	0.22932	0.695971	0.157409
A0A0H3C747	A0A0H3C747_CAUVN			Cyclophilin-type peptidylprolyl cis-trans isomerase	0.000348797	24	24	23	22	21	22	22							27.07	26.9604	26.9129	26.895	26.7543	26.895	27.07	26.9604	26.9129	26.895	26.7543	26.895	26.9826	26.8496	0.0029855	0.00302501	-0.132997	0.114299	0.941958	0.225537	0.646782
A0A0H3C748	A0A0H3C748_CAUVN			Histidine utilization repressor	0.000348797	6	2	2	0	0	0	0							20.0236	18.7092	NA	NA	NA	NA	20.0236	18.7092	20.3397	19.5076	20.8668	19.845	19.843	20.1944	0.0439145	0.0352566	0.351318	0.518988	0.284843	0.635534	0.196861
A0A0H3C749	A0A0H3C749_CAUVN			Alpha-1,2-mannosidase	0.000348797	25	14	15	17	24	25	24							24.3516	24.277	24.3668	26.9737	26.841	26.8895	24.3516	24.277	24.3668	26.9737	26.841	26.8895	24.3323	26.9024	0.00197477	0.00249535	2.57009	3.90574e-08	7.4083	2.24487e-05	4.64881
A0A0H3C750	A0A0H3C750_CAUVN			Uncharacterized protein	0.000348797	10	10	10	10	10	10	10							25.3195	25.3321	25.2803	25.2136	25.3067	25.3682	25.3195	25.3321	25.2803	25.2136	25.3067	25.3682	25.3108	25.2976	0.00106814	0.00307668	-0.0132014	0.815407	0.0886255	0.867893	0.0615338
A0A0H3C752	A0A0H3C752_CAUVN			Uncharacterized protein	0.000348797	5	5	5	5	4	5	4							23.3236	22.9964	22.8888	22.7995	22.7894	22.6957	23.3236	22.9964	22.8888	22.7995	22.7894	22.6957	23.0817	22.7623	0.00981473	0.00251573	-0.319406	0.0504997	1.29671	0.130905	0.883045
A0A0H3C753	A0A0H3C753_CAUVN			D-galactose 1-dehydrogenase	0.000348797	8	7	7	6	6	7	6							23.5518	23.41	23.2008	23.2429	23.1181	23.2734	23.5518	23.41	23.2008	23.2429	23.1181	23.2734	23.3947	23.213	0.00755127	0.0035462	-0.18164	0.150915	0.821269	0.270893	0.567202
A0A0H3C754	A0A0H3C754_CAUVN			Uncharacterized protein	0.000348797	7	6	6	4	4	7	5							24.8357	24.5721	24.8847	24.8338	27.08	25.0251	24.8357	24.5721	24.8847	24.8338	27.08	25.0251	24.7705	26.0325	0.00678943	0.0485574	1.26198	0.2117	0.674278	0.342211	0.465706
A0A0H3C755	A0A0H3C755_CAUVN			Sulfate transport system permease protein cysW	0.00463423	1	1	1	1	1	1	1							19.7246	19.7344	20.0455	19.5336	19.8052	20.0301	19.7246	19.7344	20.0455	19.5336	19.8052	20.0301	19.8427	19.8038	0.00920238	0.0125631	-0.0389296	0.78589	0.104638	0.846408	0.0724203
A0A0H3C756	A0A0H3C756_CAUVN			Tryptophan halogenase superfamily protein	0.000348797	8	8	7	8	7	6	5							23.7582	23.6391	23.4659	22.8929	22.5077	22.6404	23.7582	23.6391	23.4659	22.8929	22.5077	22.6404	23.626	22.6893	0.00622372	0.00862792	-0.93675	0.000513265	3.28966	0.00820409	2.08597
A0A0H3C758	A0A0H3C758_CAUVN			Circularly permuted ATP-grasp type 2 protein	0.000348797	20	19	18	20	18	17	19							25.7867	25.7445	26.1723	25.7376	25.4454	25.8463	25.7867	25.7445	26.1723	25.7376	25.4454	25.8463	25.9144	25.6861	0.00910273	0.00807444	-0.228242	0.217262	0.663017	0.347274	0.459328
A0A0H3C759	A0A0H3C759_CAUVN			Probable cytosol aminopeptidase	0.000348797	30	29	30	29	27	30	29							27.2973	27.2814	27.365	27.5294	27.4956	27.5867	27.2973	27.2814	27.365	27.5294	27.4956	27.5867	27.315	27.5377	0.00162605	0.0016722	0.222716	0.00702859	2.15313	0.0362963	1.44014
A0A0H3C761	A0A0H3C761_CAUVN			N-succinylglutamate 5-semialdehyde dehydrogenase	0.000348797	10	9	10	10	9	9	10							25.4171	25.3993	25.4572	25.7341	25.5897	25.7004	25.4171	25.3993	25.4572	25.7341	25.5897	25.7004	25.4247	25.676	0.00116584	0.00294354	0.251287	0.00650546	2.18672	0.0344185	1.46321
A0A0H3C762	A0A0H3C762_CAUVN			FecR family protein	0.000348797	5	1	1	1	1	3	0							16.6605	16.2585	17.6888	17.4102	19.756	NA	16.6605	16.2585	17.6888	17.4102	19.756	18.9555	17.0002	18.9955	0.0437282	0.0637412	1.99527	0.0421538	1.37516	0.115455	0.937588
A0A0H3C764	A0A0H3C764_CAUVN			Phe-4-monooxygenase	0.000348797	16	3	2	4	2	2	2							20.9745	21.1238	22.2146	21.0172	19.9874	20.6465	20.9745	21.1238	22.2146	21.0172	19.9874	20.6465	21.5502	20.6106	0.0315796	0.0253828	-0.939566	0.0867413	1.06177	0.187712	0.726509
A0A0H3C765	A0A0H3C765_CAUVN			Glyoxalase family protein	0.000348797	10	10	10	9	8	6	7							25.5546	25.5664	25.5466	25.2513	25.3932	25.2664	25.5546	25.5664	25.5466	25.2513	25.3932	25.2664	25.5559	25.305	0.000390117	0.00308007	-0.250866	0.00587181	2.23123	0.032311	1.49065
A0A0H3C766	A0A0H3C766_CAUVN			Uncharacterized protein	0.000348797	4	3	3	3	2	3	3							22.7942	22.4036	22.7	23.1067	23.1812	23.0675	22.7942	22.4036	22.7	23.1067	23.1812	23.0675	22.642	23.1193	0.0090066	0.00249731	0.477243	0.00640722	2.19333	0.0340778	1.46753
A0A0H3C768	A0A0H3C768_CAUVN			Inosine-5'-monophosphate dehydrogenase	0.000348797	52	52	51	51	51	52	52							29.2495	29.2008	29.2222	29.5581	29.3871	29.5292	29.2495	29.2008	29.2222	29.5581	29.3871	29.5292	29.2243	29.4934	0.000834778	0.00310489	0.269099	0.00687729	2.16258	0.0356369	1.4481
A0A0H3C769	A0A0H3C769_CAUVN			Peptide chain release factor 3	0.000348797	45	45	44	40	39	43	43							27.6029	27.4687	27.5091	27.5963	27.6079	27.5959	27.6029	27.4687	27.5091	27.5963	27.6079	27.5959	27.528	27.6	0.00250129	0.000248391	0.0719923	0.233617	0.631495	0.36592	0.436614
A0A0H3C771	A0A0H3C771_CAUVN			TonB-dependent outer membrane receptor	0.000348797	12	12	10	11	12	11	7							23.4288	23.2859	23.2441	22.9229	22.6239	22.5632	23.4288	23.2859	23.2441	22.9229	22.6239	22.5632	23.3218	22.7121	0.00415524	0.00848102	-0.609684	0.00233366	2.63196	0.0182241	1.73935
A0A0H3C773	A0A0H3C773_CAUVN			Acetyltransferase	0.000348797	2	2	2	2	2	2	2							20.6841	20.8477	20.0222	20.3562	20.7922	20.5847	20.6841	20.8477	20.0222	20.3562	20.7922	20.5847	20.5597	20.5887	0.021303	0.0105974	0.0289929	0.816665	0.0879558	0.86814	0.06141
A0A0H3C774	A0A0H3C774_CAUVN			L-isoaspartyl protein carboxyl methyltransferase	0.000348797	16	16	15	16	16	16	16							28.9715	28.9414	28.9426	29.1727	29.001	28.9979	28.9715	28.9414	28.9426	29.1727	29.001	28.9979	28.9519	29.0595	0.00058723	0.00344214	0.107616	0.16538	0.781518	0.28896	0.539162
A0A0H3C776	A0A0H3C776_CAUVN			Uncharacterized protein	0.000348797	6	6	6	6	5	5	6							25.2048	25.1872	25.1229	25.3708	25.2837	25.3365	25.2048	25.1872	25.1229	25.3708	25.2837	25.3365	25.1721	25.3308	0.00171397	0.00173334	0.158706	0.0259208	1.58635	0.0855376	1.06784
A0A0H3C777	A0A0H3C777_CAUVN			Helix-turn-helix transcriptional regulator	0.000348797	5	5	5	5	4	4	5							23.3337	23.3184	22.9823	22.9174	23.0411	23.0713	23.3337	23.3184	22.9823	22.9174	23.0411	23.0713	23.2203	23.0115	0.00855796	0.00354441	-0.208853	0.133867	0.873327	0.249483	0.60296
A0A0H3C778	A0A0H3C778_CAUVN			PTS system, N-acetylglucosamine-specific IIBC component	0.000348797	3	0	0	0	2	3	3							NA	NA	NA	22.6025	22.0685	22.6838	18.2571	20.1368	18.8371	22.6025	22.0685	22.6838	19.2985	22.4763	0.0504557	0.0148896	3.17775	0.000820681	3.08583	0.0108069	1.9663
A0A0H3C779	A0A0H3C779_CAUVN			DUF1080 domain-containing protein	0.000348797	4	4	4	4	3	3	2							22.8516	22.5226	22.2628	21.0236	21.5584	21.0056	22.8516	22.5226	22.2628	21.0236	21.5584	21.0056	22.5659	21.2195	0.0130882	0.0148187	-1.34633	0.00116579	2.93338	0.0125339	1.90191
A0A0H3C780	A0A0H3C780_CAUVN			DUF1801 domain-containing protein	0.000348797	2	2	2	2	2	2	2							21.0459	20.8892	21.291	21.1257	21.0584	20.9398	21.0459	20.8892	21.291	21.1257	21.0584	20.9398	21.0849	21.0433	0.00960976	0.00447227	-0.0415839	0.784269	0.105535	0.845314	0.072982
A0A0H3C781	A0A0H3C781_CAUVN			UDP-perosamine 4-acetyl transferase PerB	0.000348797	16	15	15	15	15	15	15							25.9698	25.866	25.7808	26.0093	25.8642	25.9763	25.9698	25.866	25.7808	26.0093	25.8642	25.9763	25.8743	25.9512	0.0036599	0.00293081	0.0769654	0.335645	0.47412	0.468744	0.329064
A0A0H3C782	A0A0H3C782_CAUVN			PAS-containing EAL phosphodiesterase	0.000348797	20	20	20	20	19	18	20							26.165	26.1458	26.023	26.1414	26.1172	26.2478	26.165	26.1458	26.023	26.1414	26.1172	26.2478	26.1126	26.1699	0.00295093	0.0026537	0.0572876	0.424385	0.37224	0.54883	0.260562
A0A0H3C783	A0A0H3C783_CAUVN			Family 67 glycosyl hydrolase protein	0.000348797	21	18	15	14	18	21	19							24.6279	24.3308	24.3355	25.423	25.3207	25.4541	24.6279	24.3308	24.3355	25.423	25.3207	25.4541	24.4382	25.4004	0.0069658	0.00274888	0.962119	0.000127199	3.89552	0.00387957	2.41122
A0A0H3C784	A0A0H3C784_CAUVN			BetA-family choline dehydrogenase	0.000348797	12	12	12	12	11	10	11							24.541	24.5453	24.6038	24.7438	24.5636	24.8062	24.541	24.5453	24.6038	24.7438	24.5636	24.8062	24.5637	24.7082	0.00142765	0.00509983	0.14449	0.123131	0.909631	0.237232	0.624826
A0A0H3C785	A0A0H3C785_CAUVN			Acetyltransferase	0.000348797	4	4	4	4	4	4	4							22.4695	22.1407	22.561	22.4854	22.0829	22.6291	22.4695	22.1407	22.561	22.4854	22.0829	22.6291	22.4014	22.4171	0.00987355	0.0126388	0.0156945	0.963591	0.0161073	0.974233	0.0113371
A0A0H3C786	A0A0H3C786_CAUVN			Methyltransferase	0.000348797	9	9	8	9	8	9	7							23.243	22.9646	22.9609	23.2628	22.9615	23.139	23.243	22.9646	22.9609	23.2628	22.9615	23.139	23.0624	23.1264	0.00701867	0.00655108	0.0639782	0.603153	0.219573	0.708446	0.149693
A0A0H3C787	A0A0H3C787_CAUVN			Glycosyltransferase	0.000348797	12	12	10	12	9	11	10							23.9265	23.3458	23.8899	23.6699	23.9399	24.2264	23.9265	23.3458	23.8899	23.6699	23.9399	24.2264	23.744	23.9633	0.0137091	0.01162	0.21926	0.342364	0.465512	0.475751	0.322621
A0A0H3C788	A0A0H3C788_CAUVN			Uncharacterized protein	0.000348797	12	12	11	11	8	10	9							24.9772	25.0019	25.0466	24.1025	24.0692	24.0941	24.9772	25.0019	25.0466	24.1025	24.0692	24.0941	25.0089	24.0887	0.00140686	0.000718723	-0.920181	2.86767e-06	5.54247	0.000618802	3.20845
A0A0H3C789	A0A0H3C789_CAUVN			GPH-family phosphatase	0.000348797	9	9	8	9	8	9	9							25.2737	25.2384	25.2186	25.1694	25.0804	25.2193	25.2737	25.2384	25.2186	25.1694	25.0804	25.2193	25.2437	25.1575	0.00110603	0.00279673	-0.0862062	0.179699	0.745454	0.305671	0.514746
A0A0H3C791	A0A0H3C791_CAUVN			Soluble lytic murein transglycosylase SdpB	0.000348797	4	2	2	3	3	3	4							20.0594	20.7189	20.3784	21.258	22.0008	21.4547	20.0594	20.7189	20.3784	21.258	22.0008	21.4547	20.4107	21.6064	0.0161793	0.0178415	1.19577	0.00446475	2.3502	0.0268685	1.57076
A0A0H3C792	A0A0H3C792_CAUVN			Zinc-finger protein	0.000348797	2	1	1	1	1	0	1							16.1706	14.9892	16.0721	14.9792	NA	15.4676	16.1706	14.9892	16.0721	14.9792	20.927	15.4676	15.8335	19.3971	0.0416352	0.192823	3.56361	0.442338	0.354246	0.565272	0.247742
A0A0H3C793	A0A0H3C793_CAUVN			FixC-family flavoprotein dehydrogenase	0.000348797	13	12	13	13	8	6	9							23.885	24.6181	24.5736	24.1045	23.5968	24.3068	23.885	24.6181	24.5736	24.1045	23.5968	24.3068	24.3956	24.0325	0.0168716	0.0152404	-0.363118	0.248438	0.604782	0.382924	0.416887
A0A0H3C794	A0A0H3C794_CAUVN			RNA polymerase sigma factor	0.000348797	5	5	5	4	5	4	5							24.5693	24.5895	24.2914	24.6345	24.5701	24.5961	24.5693	24.5895	24.2914	24.6345	24.5701	24.5961	24.4896	24.6005	0.00680297	0.00131596	0.110854	0.265149	0.57651	0.401109	0.396738
A0A0H3C798	A0A0H3C798_CAUVN			FecR family protein	0.000348797	7	6	5	6	6	7	6							22.9501	22.73	22.8282	23.1623	23.0888	22.9686	22.9501	22.73	22.8282	23.1623	23.0888	22.9686	22.8389	23.0754	0.00482858	0.00423842	0.236537	0.0342234	1.46568	0.101163	0.994977
A0A0H3C799	A0A0H3C799_CAUVN			O-linked N-acetylglucosamine transferase	0.000348797	19	19	18	18	19	19	18							26.805	26.7784	27.0045	26.8235	26.7011	26.6076	26.805	26.7784	27.0045	26.8235	26.7011	26.6076	26.8662	26.7134	0.00459983	0.00405347	-0.152784	0.153879	0.812819	0.274831	0.560935
A0A0H3C7A0	A0A0H3C7A0_CAUVN			Methyl-accepting chemotaxis protein	0.000348797	20	20	18	17	16	13	17							25.5982	25.5771	25.5229	25.1468	24.8595	25.1401	25.5982	25.5771	25.5229	25.1468	24.8595	25.1401	25.5664	25.0548	0.00151931	0.0065468	-0.511595	0.00203159	2.69216	0.0169465	1.77092
A0A0H3C7A1	A0A0H3C7A1_CAUVN			HATPase superfamily protein	0.000348797	26	24	25	26	24	25	23							27.1756	27.3452	27.3902	26.8818	26.9391	26.9607	27.1756	27.3452	27.3902	26.8818	26.9391	26.9607	27.3066	26.9276	0.00414503	0.00151415	-0.379023	0.00283269	2.5478	0.0202306	1.69399
A0A0H3C7A4	A0A0H3C7A4_CAUVN			DNA repair protein RadA	0.000348797	13	9	11	12	9	9	9							23.9781	23.9499	24.433	23.5505	23.4161	23.9266	23.9781	23.9499	24.433	23.5505	23.4161	23.9266	24.1378	23.6476	0.0112405	0.0111985	-0.490254	0.0477904	1.32066	0.126423	0.898175
A0A0H3C7A5	A0A0H3C7A5_CAUVN			Uncharacterized protein	0.000348797	26	26	25	25	24	25	25							27.3374	27.3078	27.3283	27.0026	26.8028	26.7585	27.3374	27.3078	27.3283	27.0026	26.8028	26.7585	27.3246	26.8586	0.000554033	0.00484272	-0.465948	0.00130356	2.88487	0.0132595	1.87747
A0A0H3C7A6	A0A0H3C7A6_CAUVN			Phosphoglycerate mutase family protein	0.000348797	12	5	6	6	6	7	6							22.6548	23.1806	23.1833	23.6504	23.281	23.4169	22.6548	23.1806	23.1833	23.6504	23.281	23.4169	23.0267	23.4576	0.0132292	0.00796837	0.430898	0.054804	1.26119	0.137854	0.86058
A0A0H3C7A7	A0A0H3C7A7_CAUVN			LysR-family transcriptional regulator	0.000348797	11	10	9	11	9	10	9							25.2143	25.0852	25.2463	25.2435	25.2089	25.2203	25.2143	25.0852	25.2463	25.2435	25.2089	25.2203	25.1836	25.2243	0.00338652	0.000698942	0.0406926	0.513421	0.289527	0.630904	0.200037
A0A0H3C7A8	A0A0H3C7A8_CAUVN			Replicative DNA helicase	0.000348797	40	33	37	34	30	37	34							26.3377	26.2446	26.2905	26.0931	26.2435	26.321	26.3377	26.2446	26.2905	26.0931	26.2435	26.321	26.2914	26.2223	0.00176903	0.00441881	-0.0691552	0.379305	0.421011	0.511783	0.290914
A0A0H3C7B0	A0A0H3C7B0_CAUVN			ROS/MUCR transcriptional regulator	0.000348797	18	18	18	18	16	18	18							27.8075	27.8043	27.6751	27.7138	27.6462	27.6434	27.8075	27.8043	27.6751	27.7138	27.6462	27.6434	27.7636	27.6682	0.00272213	0.00144135	-0.0954468	0.170937	0.767163	0.295762	0.529057
A0A0H3C7B1	A0A0H3C7B1_CAUVN			3'-phosphoadenosine 5'-phosphosulfate sulfotransferase	0.000348797	17	16	16	16	16	17	17							26.4665	26.453	26.69	26.8528	26.9555	27.0403	26.4665	26.453	26.69	26.8528	26.9555	27.0403	26.5406	26.9516	0.00501493	0.00348476	0.410943	0.00504807	2.29687	0.0286659	1.54264
A0A0H3C7B2	A0A0H3C7B2_CAUVN			Thioredoxin peroxidase	0.000348797	19	19	19	19	19	19	19							28.8826	28.7967	28.593	28.2153	28.2737	28.2069	28.8826	28.7967	28.593	28.2153	28.2737	28.2069	28.7625	28.2322	0.00517283	0.00128854	-0.530246	0.00132028	2.87933	0.0133845	1.8734
A0A0H3C7B3	A0A0H3C7B3_CAUVN			ADP-heptose--LPS heptosyltransferase	0.000348797	16	14	15	14	14	14	15							26.0593	25.8272	25.9469	26.0479	26.0906	26.1068	26.0593	25.8272	25.9469	26.0479	26.0906	26.1068	25.9476	26.082	0.00447421	0.00116775	0.13437	0.114194	0.942358	0.225477	0.646898
A0A0H3C7B4	A0A0H3C7B4_CAUVN			K(+)-insensitive pyrophosphate-energized proton pump	0.000348797	9	9	9	9	8	8	8							25.1683	25.2874	25.1303	23.621	23.6787	23.9636	25.1683	25.2874	25.1303	23.621	23.6787	23.9636	25.1969	23.7623	0.00325359	0.00772229	-1.43454	2.31929e-05	4.63465	0.00152317	2.81725
A0A0H3C7B5	A0A0H3C7B5_CAUVN			MutT/nudix family hydrolase	0.000348797	3	3	2	3	3	3	3							22.5522	22.2842	22.7236	22.9222	22.9318	22.7293	22.5522	22.2842	22.7236	22.9222	22.9318	22.7293	22.5312	22.8641	0.00983318	0.00499636	0.332871	0.0436927	1.35959	0.118276	0.927104
A0A0H3C7B6	A0A0H3C7B6_CAUVN			Endolytic murein transglycosylase	0.000348797	32	32	32	31	30	30	31							27.2777	27.3291	27.4169	27.458	27.2929	27.4298	27.2777	27.3291	27.4169	27.458	27.2929	27.4298	27.3424	27.3954	0.00257324	0.00322263	0.0529954	0.486592	0.312835	0.607938	0.216141
A0A0H3C7B7	A0A0H3C7B7_CAUVN			Nucleoside-diphosphate-sugar epimerase	0.000348797	15	15	14	15	14	15	13							25.3533	25.3261	25.3175	25.0864	25.1757	25.0711	25.3533	25.3261	25.3175	25.0864	25.1757	25.0711	25.3324	25.1118	0.000737875	0.00225127	-0.220581	0.00649978	2.1871	0.0344185	1.46321
A0A0H3C7B8	A0A0H3C7B8_CAUVN			Phosphate acyltransferase	0.000348797	16	15	14	14	15	13	14							26.711	26.6573	26.6821	26.8901	26.6079	26.6982	26.711	26.6573	26.6821	26.8901	26.6079	26.6982	26.6836	26.7369	0.00100679	0.00539119	0.0532864	0.586313	0.231871	0.69458	0.158278
A0A0H3C7B9	A0A0H3C7B9_CAUVN			TonB-dependent receptor	0.000348797	19	17	19	17	15	15	18							24.5174	24.814	24.7641	24.4376	24.281	24.3804	24.5174	24.814	24.7641	24.4376	24.281	24.3804	24.7042	24.3678	0.0064295	0.00325304	-0.336444	0.0167896	1.77496	0.0648611	1.18802
A0A0H3C7C1	A0A0H3C7C1_CAUVN			Cysteine desulfurase subunit SufE	0.000348797	5	5	5	5	5	5	5							25.4291	25.4274	25.3984	25.6968	25.4731	25.5596	25.4291	25.4274	25.3984	25.6968	25.4731	25.5596	25.4184	25.5795	0.000678228	0.00440879	0.161114	0.07093	1.14917	0.16295	0.787945
A0A0H3C7C2	A0A0H3C7C2_CAUVN			dTDP-glucose 4,6-dehydratase	0.000348797	15	15	15	15	13	15	14							25.6554	25.6431	25.6111	25.3152	25.3151	25.3324	25.6554	25.6431	25.6111	25.3152	25.3151	25.3324	25.6367	25.321	0.00089199	0.000393653	-0.315723	0.00058565	3.23236	0.00884625	2.05324
A0A0H3C7C3	A0A0H3C7C3_CAUVN			TonB-dependent receptor SucA	0.000348797	23	19	15	13	15	13	14							24.7189	24.3376	24.5703	24.0248	23.9913	23.9206	24.7189	24.3376	24.5703	24.0248	23.9913	23.9206	24.5507	23.9796	0.0078309	0.00221807	-0.571174	0.00260122	2.58482	0.0191199	1.71851
A0A0H3C7C4	A0A0H3C7C4_CAUVN			YjgP/YjgQ family membrane permease	0.000348797	12	12	11	12	11	12	11							25.4686	25.4162	25.6802	25.6512	25.6969	25.7611	25.4686	25.4162	25.6802	25.6512	25.6969	25.7611	25.5262	25.7038	0.00547701	0.00214826	0.177557	0.0832334	1.0797	0.18225	0.739333
A0A0H3C7C5	A0A0H3C7C5_CAUVN			MoxR-like ATPase	0.000348797	32	32	30	30	30	31	30							28.7097	28.6301	28.6143	28.6181	28.4754	28.6311	28.7097	28.6301	28.6143	28.6181	28.4754	28.6311	28.652	28.5766	0.00178558	0.00302453	-0.0753605	0.290907	0.536245	0.426617	0.369962
A0A0H3C7C6	A0A0H3C7C6_CAUVN			Uncharacterized protein	0.000348797	4	3	2	3	2	2	2							23.5513	23.6349	23.4612	23.4435	23.0053	22.8164	23.5513	23.6349	23.4612	23.4435	23.0053	22.8164	23.5509	23.1129	0.00368887	0.0139342	-0.438026	0.038996	1.40898	0.10969	0.959834
A0A0H3C7C7	A0A0H3C7C7_CAUVN			Glucose-1-phosphate thymidylyltransferase	0.000348797	16	15	15	14	15	14	14							26.5525	26.5459	26.5227	26.6967	26.5275	26.5881	26.5525	26.5459	26.5227	26.6967	26.5275	26.5881	26.5404	26.6058	0.000589206	0.00322177	0.0653716	0.336922	0.472471	0.470038	0.327867
A0A0H3C7C8	A0A0H3C7C8_CAUVN			Aminotransferase	0.000348797	22	22	22	21	21	22	22							27.2206	27.2327	27.3046	27.3484	27.4626	27.367	27.2206	27.2327	27.3046	27.3484	27.4626	27.367	27.2531	27.3935	0.00166608	0.00223571	0.140453	0.0528925	1.27661	0.134831	0.870212
A0A0H3C7C9	A0A0H3C7C9_CAUVN			CsgG-related curli protein	0.000348797	11	11	11	11	11	11	11							27.8417	27.8471	27.7009	27.6552	27.606	27.505	27.8417	27.8471	27.7009	27.6552	27.606	27.505	27.7981	27.5901	0.00298115	0.00277387	-0.208072	0.0283297	1.54776	0.0901832	1.04487
A0A0H3C7D1	A0A0H3C7D1_CAUVN			Histidinol-phosphate aminotransferase	0.000348797	5	3	4	5	3	4	3							22.8205	23.1528	23.061	22.8221	23.1302	22.6679	22.8205	23.1528	23.061	22.8221	23.1302	22.6679	23.0181	22.8864	0.0074563	0.01029	-0.131739	0.397294	0.400888	0.52638	0.278701
A0A0H3C7D3	A0A0H3C7D3_CAUVN			UDP-glucuronate decarboxylase	0.000348797	18	18	17	17	15	16	13							25.268	25.2506	25.2192	25.1379	25.149	25.2038	25.268	25.2506	25.2192	25.1379	25.149	25.2038	25.2461	25.1638	0.000977765	0.00140231	-0.0822298	0.138738	0.857804	0.255394	0.592789
A0A0H3C7D4	A0A0H3C7D4_CAUVN			L-asparaginase	0.000348797	14	9	9	9	9	8	7							22.6155	22.3893	22.3625	22.7926	22.6744	22.5629	22.6155	22.3893	22.3625	22.7926	22.6744	22.5629	22.4603	22.6797	0.00618919	0.00506503	0.219386	0.0713793	1.14643	0.163238	0.78718
A0A0H3C7D5	A0A0H3C7D5_CAUVN			Cold shock protein cspD	0.000348797	10	10	9	9	8	7	9							24.5677	24.4109	24.6991	22.9638	23.1645	23.1188	24.5677	24.4109	24.6991	22.9638	23.1645	23.1188	24.564	23.0849	0.00587486	0.00455587	-1.47912	1.20841e-05	4.91778	0.00125883	2.90003
A0A0H3C7D7	A0A0H3C7D7_CAUVN			Histidine kinase	0.000348797	21	20	21	20	21	21	21							25.0646	25.214	25.1725	25.2734	25.306	25.4472	25.0646	25.214	25.1725	25.2734	25.306	25.4472	25.1517	25.3442	0.00306667	0.00364393	0.192496	0.0432386	1.36413	0.117421	0.930253
A0A0H3C7D9	A0A0H3C7D9_CAUVN			Nucleotidyltransferase family protein	0.000348797	24	18	18	18	18	17	18							27.0234	26.9982	27.0295	26.9114	26.8857	26.9448	27.0234	26.9982	27.0295	26.9114	26.8857	26.9448	27.0171	26.9142	0.00061476	0.00110048	-0.10289	0.0694306	1.15845	0.160728	0.793909
A0A0H3C7E0	A0A0H3C7E0_CAUVN			Arginine N-succinyltransferase, beta chain	0.000348797	28	10	5	9	4	2	4							22.8588	22.5626	23.2588	21.594	20.9811	21.7592	22.8588	22.5626	23.2588	21.594	20.9811	21.7592	22.9218	21.4816	0.0152621	0.0191171	-1.44018	0.002335	2.63171	0.0182241	1.73935
A0A0H3C7E2	A0A0H3C7E2_CAUVN			Uncharacterized protein	0.000348797	2	1	2	2	2	2	2							19.6025	22.8545	22.6781	22.0408	21.8656	22.7091	19.6025	22.8545	22.6781	22.0408	21.8656	22.7091	22.2622	22.2528	0.0842297	0.0200474	-0.0094566	0.617622	0.209277	0.7204	0.142426
A0A0H3C7E3	A0A0H3C7E3_CAUVN			Polyphosphate kinase	0.000348797	29	26	29	29	28	29	27							26.1956	26.2714	26.2502	26.3121	26.5129	26.5941	26.1956	26.2714	26.2502	26.3121	26.5129	26.5941	26.2394	26.4778	0.00149033	0.00548407	0.238426	0.0377621	1.42294	0.107724	0.967689
A0A0H3C7E5	A0A0H3C7E5_CAUVN			Histidine triad (HIT) hydrolase	0.000348797	5	5	5	5	5	5	5							23.9474	23.8058	23.8709	23.4365	23.9144	23.8111	23.9474	23.8058	23.8709	23.4365	23.9144	23.8111	23.8758	23.7348	0.00296912	0.010601	-0.141014	0.305207	0.515405	0.441012	0.35555
A0A0H3C7E6	A0A0H3C7E6_CAUVN			Uncharacterized protein	0.000348797	2	2	2	1	1	2	2							19.3383	19.3328	16.8899	17.4304	19.0676	18.9303	19.3383	19.3328	16.8899	17.4304	19.0676	18.9303	18.8773	18.6401	0.07624	0.0491572	-0.237137	0.959495	0.0179573	0.971718	0.0124599
A0A0H3C7E7	A0A0H3C7E7_CAUVN			Cytochrome cbb3 oxidase, subunit ccoQ	0.0010142	1	1	1	1	0	0	1							20.3152	20.0654	19.0068	NA	NA	17.5432	20.3152	20.0654	19.0068	18.7142	20.4121	17.5432	19.8968	19.3583	0.0350902	0.0763619	-0.538536	0.301366	0.520906	0.438337	0.358192
A0A0H3C7E9	A0A0H3C7E9_CAUVN			7-keto-8-aminopelargonate synthetase	0.000348797	25	20	20	22	19	20	22							27.3284	27.2075	27.2539	27.3792	27.2258	27.3386	27.3284	27.2075	27.2539	27.3792	27.2258	27.3386	27.2641	27.316	0.00223624	0.00290944	0.0518762	0.464881	0.332658	0.58536	0.232577
A0A0H3C7F4	A0A0H3C7F4_CAUVN			Uncharacterized protein	0.000348797	7	7	7	7	7	7	7							25.8094	25.8115	25.6705	25.5025	25.6675	25.3046	25.8094	25.8115	25.6705	25.5025	25.6675	25.3046	25.7653	25.4991	0.00313683	0.00712956	-0.266212	0.0480833	1.31801	0.126931	0.896431
A0A0H3C7F6	A0A0H3C7F6_CAUVN			Glycerophosphotransferase-related protein	0.000348797	13	12	13	11	11	12	12							24.8042	25.446	25.5117	25.7948	25.8887	25.4417	24.8042	25.446	25.5117	25.7948	25.8887	25.4417	25.2873	25.7209	0.015479	0.00916729	0.433553	0.100389	0.998315	0.20547	0.687251
A0A0H3C7F7	A0A0H3C7F7_CAUVN			Tetratricopeptide repeat family protein	0.000348797	31	28	29	29	28	26	27							25.5986	25.4811	25.5767	25.0637	24.9165	25.1234	25.5986	25.4811	25.5767	25.0637	24.9165	25.1234	25.553	25.0371	0.00244558	0.00425481	-0.51588	0.000666512	3.17619	0.00968045	2.0141
A0A0H3C7F8	A0A0H3C7F8_CAUVN			Transporter, major facilitator superfamily	0.000348797	4	4	4	4	4	4	4							24.9116	24.8267	24.8989	24.1197	24.4643	24.5058	24.9116	24.8267	24.8989	24.1197	24.4643	24.5058	24.8795	24.3733	0.00184035	0.00869963	-0.506187	0.00538036	2.26919	0.030212	1.51982
A0A0H3C7F9	A0A0H3C7F9_CAUVN			Tetratricopeptide repeat family protein	0.000348797	31	25	28	27	26	26	28							25.4228	25.4676	25.7612	25.7061	25.6344	25.9887	25.4228	25.4676	25.7612	25.7061	25.6344	25.9887	25.5585	25.7847	0.00719517	0.00726708	0.226149	0.154594	0.810808	0.275046	0.560595
A0A0H3C7G1	A0A0H3C7G1_CAUVN			Arylsulfatase family protein	0.000348797	4	2	1	2	1	1	2							20.5848	20.1943	20.5357	20.3991	20.3753	20.7764	20.5848	20.1943	20.5357	20.3991	20.3753	20.7764	20.4484	20.5289	0.0104074	0.0109673	0.0805285	0.640201	0.193683	0.73755	0.132208
A0A0H3C7G3	A0A0H3C7G3_CAUVN			FkbM methyltransferase family protein	0.000348797	24	23	22	21	20	18	24							25.5653	25.4631	25.5618	25.5009	25.402	25.6102	25.5653	25.4631	25.5618	25.5009	25.402	25.6102	25.5308	25.5069	0.00227292	0.00408228	-0.0239524	0.737107	0.13247	0.809694	0.0916792
A0A0H3C7G4	A0A0H3C7G4_CAUVN			General stress protein GsiB	0.000348797	9	8	8	8	8	9	8							26.7553	26.8159	26.5553	26.7948	26.4062	26.0128	26.7553	26.8159	26.5553	26.7948	26.4062	26.0128	26.713	26.4397	0.00510629	0.0148092	-0.273317	0.201354	0.696039	0.330413	0.480942
A0A0H3C7G5	A0A0H3C7G5_CAUVN			Aldose 1-epimerase	0.000348797	5	5	5	4	4	3	4							24.0106	23.6331	23.8539	23.1723	23.5041	23.5297	24.0106	23.6331	23.8539	23.1723	23.5041	23.5297	23.8407	23.411	0.00795779	0.00851804	-0.429789	0.0265147	1.57651	0.0868008	1.06148
A0A0H3C7G6	A0A0H3C7G6_CAUVN			Acyl-acyl carrier protein synthetase	0.000348797	26	25	26	23	24	24	23							26.7784	26.7964	26.724	26.5314	26.6766	26.6571	26.7784	26.7964	26.724	26.5314	26.6766	26.6571	26.7666	26.6231	0.00140954	0.00296071	-0.143498	0.058651	1.23172	0.145472	0.837221
A0A0H3C7G7	A0A0H3C7G7_CAUVN			Nitrate transport ATP-binding protein nrtD	0.000348797	9	5	7	9	4	3	3							22.0367	22.4022	23.9869	21.063	20.1799	20.7712	22.0367	22.4022	23.9869	21.063	20.1799	20.7712	23.073	20.7162	0.0454515	0.0217664	-2.35672	0.0106635	1.9721	0.0473744	1.32446
A0A0H3C7G9	A0A0H3C7G9_CAUVN			Zn-dependent hydrolase, glyoxalase II family	0.000348797	12	12	10	11	12	12	12							24.8797	24.8066	24.5866	25.128	25.2464	25.2129	24.8797	24.8066	24.5866	25.128	25.2464	25.2129	24.7629	25.1967	0.00616331	0.00242237	0.433743	0.00399724	2.39824	0.0251054	1.60023
A0A0H3C7H0	A0A0H3C7H0_CAUVN			FAD-dependent dehydrogenase	0.000348797	29	28	27	26	26	27	28							25.3695	25.3296	25.193	25.495	25.5896	25.7368	25.3695	25.3296	25.193	25.495	25.5896	25.7368	25.2993	25.6106	0.00365747	0.00475984	0.311284	0.0139426	1.85566	0.0567282	1.2462
A0A0H3C7H1	A0A0H3C7H1_CAUVN			Histidine kinase	0.000348797	23	22	20	21	20	21	22							26.1079	25.9321	26.2929	26.3166	26.1845	26.3245	26.1079	25.9321	26.2929	26.3166	26.1845	26.3245	26.1185	26.2766	0.00691012	0.00299461	0.158114	0.178298	0.748855	0.30422	0.516813
A0A0H3C7H2	A0A0H3C7H2_CAUVN			Uroporphyrinogen III methylase	0.000348797	3	2	3	3	2	3	2							20.0321	20.832	21.2181	20.7533	20.7285	20.3488	20.0321	20.832	21.2181	20.7533	20.7285	20.3488	20.7738	20.6217	0.0292306	0.0109985	-0.152065	0.804344	0.0945581	0.860806	0.0650949
A0A0H3C7H3	A0A0H3C7H3_CAUVN			Nitrite reductase (NAD(P)H) small subunit	0.000348797	7	3	4	7	2	2	2							21.9679	21.9989	24.2212	18.6046	19.7278	19.0755	21.9679	21.9989	24.2212	18.6046	19.7278	19.0755	23.1462	19.21	0.0568465	0.0294752	-3.9362	0.00285333	2.54465	0.0202821	1.69289
A0A0H3C7H4	A0A0H3C7H4_CAUVN			Methyltransferase	0.000348797	23	23	23	23	22	21	20							26.4441	26.4238	26.4679	26.411	26.4114	26.3561	26.4441	26.4238	26.4679	26.411	26.4114	26.3561	26.4453	26.3931	0.000834619	0.00120474	-0.0522835	0.307822	0.5117	0.443035	0.353561
A0A0H3C7H6	A0A0H3C7H6_CAUVN			GTPase HflX	0.000348797	21	18	19	21	21	21	21							25.5281	25.54	25.7299	25.747	26.0152	25.999	25.5281	25.54	25.7299	25.747	26.0152	25.999	25.6023	25.9255	0.00442251	0.00580235	0.323162	0.0230159	1.63797	0.0792531	1.10098
A0A0H3C7H7	A0A0H3C7H7_CAUVN			Type I restriction-modification system specificity subunit	0.000348797	16	16	16	15	14	13	15							25.4232	25.3522	25.5535	25.2452	25.133	25.2753	25.4232	25.3522	25.5535	25.2452	25.133	25.2753	25.4454	25.2191	0.00401365	0.00297346	-0.2263	0.0279875	1.55304	0.0893766	1.04878
A0A0H3C7H8	A0A0H3C7H8_CAUVN			FepC-type transporter protein	0.000348797	9	9	9	9	8	9	9							24.4544	24.486	24.4658	24.2973	24.2814	24.2272	24.4544	24.486	24.4658	24.2973	24.2814	24.2272	24.4688	24.2689	0.000654749	0.0015144	-0.199869	0.00657148	2.18234	0.0346843	1.45987
A0A0H3C7H9	A0A0H3C7H9_CAUVN			Chitooligosaccharide deacetylase	0.000348797	19	19	17	18	15	18	15							25.1405	25.1733	25.2115	24.77	24.9057	24.8384	25.1405	25.1733	25.2115	24.77	24.9057	24.8384	25.1754	24.8391	0.00141279	0.00273082	-0.33632	0.00146185	2.8351	0.0141546	1.8491
A0A0H3C7I0	A0A0H3C7I0_CAUVN	A0A0H3C7I0;A0A0H3CBH7	CCNA_01826;CCNA_02777	Vitamin B12 receptor	0.000348797	96	94	93	94	96	93	91	1	1	1	1	1	1	33.9498	33.9519	33.9748	34.1285	33.9753	33.9932	33.9498	33.9519	33.9748	34.1285	33.9753	33.9932	33.9589	34.0339	0.000408771	0.00246187	0.0750886	0.26923	0.569877	0.405051	0.39249
A0A0H3C7I3	A0A0H3C7I3_CAUVN			Conserved hypothetical membrane protein	0.00332889	1	1	1	1	1	1	1							19.3507	19.688	20.5903	19.7883	19.7453	20.2849	19.3507	19.688	20.5903	19.7883	19.7453	20.2849	19.9751	19.961	0.0322454	0.0150424	-0.0141216	0.864456	0.0632571	0.906588	0.0425901
A0A0H3C7I4	A0A0H3C7I4_CAUVN			Uncharacterized protein	0.000348797	4	3	3	4	3	4	3							22.8515	22.839	23.2416	22.7705	22.773	23.0157	22.8515	22.839	23.2416	22.7705	22.773	23.0157	22.9898	22.8577	0.00996212	0.00616405	-0.132109	0.410965	0.386196	0.538622	0.268716
A0A0H3C7I5	A0A0H3C7I5_CAUVN			Tryptophan halogenase superfamily protein	0.000348797	7	7	7	6	7	5	6							22.8495	22.9322	22.7455	22.2861	21.9816	22.3508	22.8495	22.9322	22.7455	22.2861	21.9816	22.3508	22.8444	22.2149	0.00409477	0.00887642	-0.629511	0.00210929	2.67586	0.0172509	1.76319
A0A0H3C7I6	A0A0H3C7I6_CAUVN			Cystine transport ATP-binding protein	0.000348797	9	7	7	7	6	6	6							23.0545	23.0435	23.0466	22.8007	23.0522	22.7526	23.0545	23.0435	23.0466	22.8007	23.0522	22.7526	23.0482	22.8746	0.000245862	0.0070355	-0.173623	0.0986013	1.00612	0.202879	0.692762
A0A0H3C7I7	A0A0H3C7I7_CAUVN			Capsular polysaccharide biosynthesis protein	0.000348797	9	7	7	6	7	7	7							23.7703	23.8171	23.9047	23.9651	24.028	23.7006	23.7703	23.8171	23.9047	23.9651	24.028	23.7006	23.8318	23.9047	0.0028622	0.00726908	0.0729356	0.535679	0.271096	0.649653	0.187319
A0A0H3C7I8	A0A0H3C7I8_CAUVN			Cation/multidrug efflux pump, AcrB family	0.000348797	31	30	30	30	30	30	30							26.7531	26.9073	26.9129	27.0015	26.9072	26.9909	26.7531	26.9073	26.9129	27.0015	26.9072	26.9909	26.8596	26.9671	0.00337746	0.00191446	0.1075	0.160056	0.795728	0.281646	0.550297
A0A0H3C7I9	A0A0H3C7I9_CAUVN			Uncharacterized protein	0.000348797	16	10	10	11	14	9	10							23.9216	23.6295	23.7438	24.4793	23.5436	23.8271	23.9216	23.6295	23.7438	24.4793	23.5436	23.8271	23.77	24.0048	0.00619377	0.0200336	0.23474	0.493305	0.306885	0.613281	0.21234
A0A0H3C7J0	A0A0H3C7J0_CAUVN			Acyl-CoA thioesterase I/lysophospholipase	0.000348797	9	8	8	9	7	8	8							24.0857	24.1138	23.83	23.7989	23.5787	23.6447	24.0857	24.1138	23.83	23.7989	23.5787	23.6447	24.0154	23.6771	0.00651438	0.00477293	-0.338272	0.0210153	1.67746	0.0747105	1.12662
A0A0H3C7J2	A0A0H3C7J2_CAUVN			AraC-family transcriptional regulator	0.00914734	1	1	1	0	1	1	1							19.2108	16.3876	NA	17.4027	17.4327	18.3183	19.2108	16.3876	18.7301	17.4027	17.4327	18.3183	18.5195	17.7839	0.0834078	0.0293578	-0.735608	0.640282	0.193628	0.73755	0.132208
A0A0H3C7J3	A0A0H3C7J3_CAUVN			LacI-family transcriptional regulator SucR	0.000348797	16	12	9	11	12	11	12							24.6307	24.3683	24.6376	24.583	24.3654	24.5756	24.6307	24.3683	24.6376	24.583	24.3654	24.5756	24.5509	24.5115	0.00625392	0.00503988	-0.0394178	0.737328	0.132339	0.809694	0.0916792
A0A0H3C7J4	A0A0H3C7J4_CAUVN			NTF2 superfamily protein	0.000348797	3	3	2	3	3	3	2							21.4595	20.6054	21.2771	21.0955	21.4636	20.7052	21.4595	20.6054	21.2771	21.0955	21.4636	20.7052	21.1581	21.1211	0.0213019	0.0179835	-0.0370426	0.933086	0.0300784	0.954249	0.0203382
A0A0H3C7J5	A0A0H3C7J5_CAUVN			Malate synthase	0.000348797	20	18	17	17	18	18	18							25.0357	24.7641	24.8034	25.1137	24.904	25.0804	25.0357	24.7641	24.8034	25.1137	24.904	25.0804	24.8728	25.0356	0.00590322	0.00450086	0.162785	0.158478	0.80003	0.280423	0.552186
A0A0H3C7J6	A0A0H3C7J6_CAUVN			NAD(P)H:FMN oxidoreductase family protein	0.000348797	7	7	7	7	7	7	7							25.647	25.5899	25.8031	25.7472	25.3364	25.7978	25.647	25.5899	25.8031	25.7472	25.3364	25.7978	25.6828	25.6414	0.00429909	0.00987386	-0.0414248	0.72577	0.139201	0.801957	0.0958487
A0A0H3C7J7	A0A0H3C7J7_CAUVN			2-hydroxychromene-2-carboxylate isomerase	0.000348797	12	12	12	11	11	11	12							26.5903	26.6191	26.4706	26.6732	26.5743	26.5993	26.5903	26.6191	26.4706	26.6732	26.5743	26.5993	26.5614	26.6162	0.00296638	0.00193192	0.0548077	0.414829	0.382131	0.540871	0.266907
A0A0H3C7J9	A0A0H3C7J9_CAUVN			Peptidyl-tRNA hydrolase family protein ArfB	0.000348797	4	2	3	3	2	3	3							21.3425	21.0857	20.9947	20.2282	21.952	21.9404	21.3425	21.0857	20.9947	20.2282	21.952	21.9404	21.1486	21.5654	0.00853189	0.0464076	0.416744	0.660416	0.180182	0.752923	0.123249
A0A0H3C7K1	A0A0H3C7K1_CAUVN			ATP-dependent protease subunit	0.000348797	18	18	16	17	14	16	15							25.4158	25.3049	25.2499	25.0822	25.0013	24.9342	25.4158	25.3049	25.2499	25.0822	25.0013	24.9342	25.3252	25.0072	0.00333685	0.00296504	-0.317984	0.00502766	2.29863	0.0286577	1.54276
A0A0H3C7K4	A0A0H3C7K4_CAUVN			NAD kinase	0.000348797	13	13	12	13	10	11	11							24.863	24.754	24.788	24.6564	24.4276	24.6173	24.863	24.754	24.788	24.6564	24.4276	24.6173	24.8024	24.5705	0.00224855	0.00498198	-0.231921	0.0280551	1.55199	0.089498	1.04819
A0A0H3C7K6	A0A0H3C7K6_CAUVN	A0A0H3C7X1;A0A0H3C5N8; A0A0H3C4Q0;A0A0H3C7K6		Flagellin	NA	10	9	10	10	9	9	9	4	5	5	4	4	4	26.0972	25.8554	26.0108	25.1024	25.2297	25.2583	26.0972	25.8554	26.0108	25.1024	25.2297	25.2583	25.9912	25.1984	0.00471499	0.00329258	-0.792831	0.000149072	3.8266	0.0043723	2.35929
A0A0H3C7K7	A0A0H3C7K7_CAUVN			CarD-family transcriptional regulator	0.000348797	19	17	17	17	18	19	18							29.4891	29.3929	29.4675	30.304	30.0791	30.1904	29.4891	29.3929	29.4675	30.304	30.0791	30.1904	29.4504	30.1941	0.00171354	0.00372556	0.743674	0.000106332	3.97333	0.00349163	2.45697
A0A0H3C7K8	A0A0H3C7K8_CAUVN	A0A0H3C4H5;A0A0H3C7K8	CCNA_01211;rpe	MobA-like NTP transferase domain protein	0.000348797	14	14	11	13	13	14	13	1	1	1	1	1	1	24.9925	24.7559	25.0249	25.2862	25.3034	25.241	24.9925	24.7559	25.0249	25.2862	25.3034	25.241	24.9293	25.2771	0.0058932	0.0012746	0.347784	0.00772373	2.11217	0.0388243	1.4109
A0A0H3C7L0	A0A0H3C7L0_CAUVN			AraC-family transcriptional regulator	0.000348797	12	12	12	12	12	12	12							29.1688	29.2283	29.2183	29.4961	29.3556	29.232	29.1688	29.2283	29.2183	29.4961	29.3556	29.232	29.2054	29.3653	0.00109108	0.00450032	0.159899	0.102368	0.989834	0.208252	0.68141
A0A0H3C7L1	A0A0H3C7L1_CAUVN			Metal-dependent hydrolase	0.000348797	35	35	35	35	31	34	35							27.0802	26.9878	27.0862	26.8366	26.914	26.8667	27.0802	26.9878	27.0862	26.8366	26.914	26.8667	27.0521	26.8728	0.00203889	0.00145218	-0.179276	0.0187215	1.72766	0.0693107	1.1592
A0A0H3C7L2	A0A0H3C7L2_CAUVN			Phosphohydrolase, Icc family	0.000348797	12	12	12	12	11	12	11							24.813	24.6139	24.6331	24.7044	24.8942	24.826	24.813	24.6139	24.6331	24.7044	24.8942	24.826	24.6895	24.8103	0.00444779	0.00387553	0.120849	0.20202	0.694607	0.330966	0.480217
A0A0H3C7L3	A0A0H3C7L3_CAUVN			Uncharacterized protein	0.000348797	9	9	8	9	9	9	8							26.2715	26.3982	26.408	26.5226	26.299	26.3714	26.2715	26.3982	26.408	26.5226	26.299	26.3714	26.3606	26.4007	0.00288927	0.00432302	0.040139	0.650028	0.187068	0.744694	0.128022
A0A0H3C7L5	A0A0H3C7L5_CAUVN			Outer membrane efflux protein	0.000348797	3	3	3	3	2	1	1							20.6818	19.7533	19.8692	16.5921	15.9923	17.3776	20.6818	19.7533	19.8692	16.5921	15.9923	17.3776	20.1636	16.7657	0.0251694	0.0417149	-3.39796	0.000316794	3.49922	0.00629627	2.20092
A0A0H3C7L7	A0A0H3C7L7_CAUVN			Acyl carrier protein	0.000348797	4	4	4	4	4	4	4							26.8322	26.9052	26.9283	27.0762	26.9262	27.0061	26.8322	26.9052	26.9283	27.0762	26.9262	27.0061	26.8892	27.0042	0.00186646	0.00277905	0.114989	0.118244	0.92722	0.230691	0.63697
A0A0H3C7L8	A0A0H3C7L8_CAUVN			Pyruvate, phosphate dikinase	0.000348797	106	96	94	93	90	92	96							30.7234	30.7429	30.7074	31.0694	30.9737	30.9718	30.7234	30.7429	30.7074	31.0694	30.9737	30.9718	30.7247	31.0057	0.00057819	0.00179945	0.280997	0.00216452	2.66464	0.0173988	1.75948
A0A0H3C7M1	A0A0H3C7M1_CAUVN			Cobaltochelatase cobT subunit	0.000348797	34	34	31	32	32	32	34							26.6578	26.5721	26.5279	26.8192	26.8462	26.7852	26.6578	26.5721	26.5279	26.8192	26.8462	26.7852	26.5869	26.8171	0.00248423	0.00113971	0.23015	0.00745007	2.12784	0.0378263	1.42221
A0A0H3C7M2	A0A0H3C7M2_CAUVN			Uncharacterized protein	0.000348797	15	15	13	15	15	14	14							26.6127	27.0016	26.1177	26.6137	26.9955	26.3283	26.6127	27.0016	26.1177	26.6137	26.9955	26.3283	26.6218	26.6719	0.0166701	0.0125625	0.0500627	0.814567	0.089073	0.867704	0.0616285
A0A0H3C7M3	A0A0H3C7M3_CAUVN			OmdA-family protein	0.000348797	5	5	5	5	3	4	4							21.2476	21.3729	21.114	19.8459	20.8541	20.6507	21.2476	21.3729	21.114	19.8459	20.8541	20.6507	21.2487	20.5114	0.00609347	0.0260699	-0.737297	0.0309504	1.50933	0.0956044	1.01952
A0A0H3C7M5	A0A0H3C7M5_CAUVN			Formylglycine-generating sulfatase	0.000348797	3	2	3	3	3	3	3							21.0037	21.2888	21.1906	21.459	21.1829	21.2197	21.0037	21.2888	21.1906	21.459	21.1829	21.2197	21.1658	21.2925	0.00684415	0.00704348	0.126675	0.305495	0.514996	0.441012	0.35555
A0A0H3C7N3	A0A0H3C7N3_CAUVN			Amino acid permease	0.000348797	14	13	13	13	12	12	11							27.1758	27.3232	27.4864	26.9571	26.9742	27.0302	27.1758	27.3232	27.4864	26.9571	26.9742	27.0302	27.3341	26.9875	0.00568535	0.00141599	-0.346564	0.0107991	1.96661	0.0475915	1.32247
A0A0H3C7N4	A0A0H3C7N4_CAUVN			Uncharacterized protein	0.000348797	11	11	11	11	11	11	11							24.6641	24.5919	24.5911	24.7246	24.5977	24.5292	24.6641	24.5919	24.5911	24.7246	24.5977	24.5292	24.6161	24.6194	0.00170324	0.00402729	0.00333481	0.983685	0.00714377	0.986952	0.0057038
A0A0H3C7N5	A0A0H3C7N5_CAUVN			Glyoxalase family protein	0.0010142	1	1	1	1	1	1	1							20.8666	21.3157	21.4324	21.464	21.0972	20.5085	20.8666	21.3157	21.4324	21.464	21.0972	20.5085	21.2248	21.0751	0.0140885	0.0229288	-0.149659	0.548215	0.261049	0.659824	0.180572
A0A0H3C7N7	A0A0H3C7N7_CAUVN			CESA-like glycosyltransferase	0.000348797	7	5	7	7	5	6	6							21.8639	25.5973	25.5756	22.4282	22.2281	25.5277	21.8639	25.5973	25.5756	22.4282	22.2281	25.5277	25.0551	24.2275	0.08828	0.0790753	-0.827633	0.526049	0.278974	0.641754	0.192632
A0A0H3C7N9	A0A0H3C7N9_CAUVN			Metal-dependent hydrolase	0.000348797	7	7	7	6	6	7	7							23.9219	23.9908	24.0736	24.3618	24.0656	23.9587	23.9219	23.9908	24.0736	24.3618	24.0656	23.9587	23.9968	24.1389	0.00316717	0.00865445	0.142171	0.305782	0.514589	0.441012	0.35555
A0A0H3C7P0	A0A0H3C7P0_CAUVN			Ribosomal large subunit pseudouridine synthase C	0.000348797	11	11	10	11	11	10	10							24.4338	24.2855	24.438	24.4155	24.2893	24.2991	24.4338	24.2855	24.438	24.4155	24.2893	24.2991	24.3874	24.3357	0.00356166	0.00288516	-0.0516975	0.493697	0.30654	0.613516	0.212174
A0A0H3C7P1	A0A0H3C7P1_CAUVN			Soluble lytic murein transglycosylase SdpA	0.000348797	39	39	38	38	38	39	37							27.2318	27.1544	27.2685	27.2501	27.225	27.4175	27.2318	27.1544	27.2685	27.2501	27.225	27.4175	27.219	27.3001	0.00214002	0.00383283	0.0810544	0.322759	0.491122	0.457343	0.339758
A0A0H3C7P2	A0A0H3C7P2_CAUVN			HAD superfamily sugar phosphatase	0.000348797	8	7	8	8	7	7	7							25.8201	25.758	25.7698	25.8518	25.8604	25.9431	25.8201	25.758	25.7698	25.8518	25.8604	25.9431	25.7829	25.8857	0.00127952	0.00194766	0.102831	0.100587	0.997459	0.205736	0.686689
A0A0H3C7P4	A0A0H3C7P4_CAUVN			Nickel-responsive regulator NikR	0.000348797	3	0	0	1	1	0	1							NA	NA	16.3342	15.6495	NA	15.7998	20.4691	18.6437	16.3342	15.6495	19.748	15.7998	19.3054	18.3306	0.112116	0.136186	-0.974742	0.397148	0.401047	0.52638	0.278701
A0A0H3C7P6	A0A0H3C7P6_CAUVN			Cyclic-di-GMP phosphodiesterase, flagellum assembly factor TipF	0.000348797	6	4	3	3	4	3	3							22.4787	22.327	22.7858	22.765	22.2929	22.5453	22.4787	22.327	22.7858	22.765	22.2929	22.5453	22.5433	22.5472	0.0103764	0.0104835	0.00391814	0.982438	0.00769472	0.986356	0.00596618
A0A0H3C7P7	A0A0H3C7P7_CAUVN			Myo-inositol-hexaphosphate 3-phosphohydrolase	0.000348797	51	42	51	39	34	23	38							28.5269	30.5512	28.2823	27.5995	26.6155	28.0941	28.5269	30.5512	28.2823	27.5995	26.6155	28.0941	29.5056	27.5578	0.0427652	0.0274338	-1.94777	0.0627307	1.20252	0.151528	0.819507
A0A0H3C7P9	A0A0H3C7P9_CAUVN			NAD(FAD)-utilizing dehydrogenase	0.000348797	17	15	15	15	12	13	15							23.7316	25.5638	25.6918	23.1947	25.5526	23.7572	23.7316	25.5638	25.6918	23.1947	25.5526	23.7572	25.2259	24.5363	0.0438731	0.0509547	-0.689649	0.354171	0.450787	0.485683	0.313647
A0A0H3C7Q0	A0A0H3C7Q0_CAUVN			Pyruvate dehydrogenase E1 component	0.000348797	22	12	12	12	6	6	10							24.3121	24.22	24.2612	22.8416	22.7865	23.2027	24.3121	24.22	24.2612	22.8416	22.7865	23.2027	24.2649	22.9557	0.00190031	0.00985434	-1.30922	6.88167e-05	4.16231	0.0028094	2.55139
A0A0H3C7Q1	A0A0H3C7Q1_CAUVN			3-hydroxybutyryl-CoA dehydrogenase	0.000348797	22	22	22	22	21	21	22							28.6838	28.7081	28.6655	28.8877	28.806	28.7231	28.6838	28.7081	28.6655	28.8877	28.806	28.7231	28.6859	28.8072	0.000743538	0.00285771	0.121271	0.0968286	1.014	0.201182	0.69641
A0A0H3C7Q3	A0A0H3C7Q3_CAUVN			Protein ydhR	0.000348797	6	5	6	6	5	6	6							24.1534	24.0499	24.0793	24.423	24.5301	24.4397	24.1534	24.0499	24.0793	24.423	24.5301	24.4397	24.0948	24.465	0.0022133	0.00235657	0.370211	0.000981569	3.00808	0.0112521	1.94877
A0A0H3C7Q4	A0A0H3C7Q4_CAUVN			Cytochrome c	0.000348797	9	9	8	9	7	9	9							25.1478	25.3301	25.3624	25.2384	25.2842	25.529	25.1478	25.3301	25.3624	25.2384	25.2842	25.529	25.2831	25.3563	0.00457719	0.00616492	0.0731355	0.530522	0.275296	0.645212	0.190297
A0A0H3C7Q5	A0A0H3C7Q5_CAUVN			Myo-inositol catabolism protein IolE	0.000348797	11	7	5	5	5	5	6							24.0413	23.0008	23.9307	23.996	23.2216	23.7304	24.0413	23.0008	23.9307	23.996	23.2216	23.7304	23.7268	23.684	0.0241556	0.0166396	-0.0428375	0.981779	0.00798619	0.98635	0.00596889
A0A0H3C7Q6	A0A0H3C7Q6_CAUVN			Lysyl-tRNA synthetase	0.000348797	6	5	6	6	5	5	4							23.4543	23.6109	23.4761	22.9952	23.1895	23.0427	23.4543	23.6109	23.4761	22.9952	23.1895	23.0427	23.5154	23.0782	0.00360742	0.00439162	-0.437231	0.00188379	2.72497	0.0161321	1.79231
A0A0H3C7Q7	A0A0H3C7Q7_CAUVN			LacI-family transcriptional regulator	0.000348797	23	21	20	21	19	21	20							26.7209	26.7511	26.8654	26.974	26.7638	26.794	26.7209	26.7511	26.8654	26.974	26.7638	26.794	26.7805	26.847	0.00284496	0.00423361	0.0664618	0.451641	0.345207	0.574276	0.240879
A0A0H3C7Q8	A0A0H3C7Q8_CAUVN			Alpha-methylacyl-CoA racemase	0.000348797	12	11	11	12	9	10	10							25.3343	25.6189	25.6138	26.3713	26.354	26.4529	25.3343	25.6189	25.6138	26.3713	26.354	26.4529	25.5284	26.3934	0.00638084	0.00200038	0.865019	0.000162953	3.78794	0.00451635	2.34521
A0A0H3C7Q9	A0A0H3C7Q9_CAUVN			Aldehyde dehydrogenase (NAD(+))	0.000348797	19	19	18	17	17	16	16							28.0654	28.6281	28.6112	28.8188	28.5328	28.6061	28.0654	28.6281	28.6112	28.8188	28.5328	28.6061	28.4575	28.6577	0.0112583	0.0051838	0.200256	0.275923	0.559213	0.412043	0.385058
A0A0H3C7R0	A0A0H3C7R0_CAUVN			Histidine kinase	0.000348797	10	10	10	10	8	8	9							23.8865	24.9947	23.7401	22.8126	23.1206	23.7616	23.8865	24.9947	23.7401	22.8126	23.1206	23.7616	24.3228	23.2871	0.0283389	0.0208396	-1.03563	0.0626105	1.20335	0.151486	0.819629
A0A0H3C7R1	A0A0H3C7R1_CAUVN			Electron transfer flavoprotein alpha subunit	0.000348797	32	32	30	31	29	30	30							30.4629	30.4581	30.4374	30.4565	30.2793	30.34	30.4629	30.4581	30.4374	30.4565	30.2793	30.34	30.4528	30.3605	0.000443834	0.00296682	-0.0923366	0.18415	0.734828	0.310099	0.5085
A0A0H3C7R2	A0A0H3C7R2_CAUVN			2-dehydro-3-deoxygluconokinase	0.000348797	36	34	34	35	36	35	35							30.1253	30.0571	30.1019	30.6735	30.5253	30.6366	30.1253	30.0571	30.1019	30.6735	30.5253	30.6366	30.095	30.6132	0.00115256	0.00251936	0.518124	0.000218731	3.66009	0.00532892	2.27336
A0A0H3C7R3	A0A0H3C7R3_CAUVN			SAM-dependent methyltransferase	0.000348797	3	2	2	2	2	3	3							20.6799	20.69	20.9233	20.9998	21.1601	21.2435	20.6799	20.69	20.9233	20.9998	21.1601	21.2435	20.7689	21.138	0.00663235	0.00586059	0.36908	0.0125416	1.90165	0.0528426	1.27702
A0A0H3C7R4	A0A0H3C7R4_CAUVN			Cell development regulator SpmY	0.000348797	10	7	7	7	7	7	9							23.5222	23.3765	23.2082	22.8466	23.1502	23.543	23.5222	23.3765	23.2082	22.8466	23.1502	23.543	23.3747	23.2083	0.0067248	0.0150637	-0.1664	0.371714	0.429791	0.504696	0.29697
A0A0H3C7R5	A0A0H3C7R5_CAUVN			Acyl-CoA dehydrogenase	0.000348797	26	26	25	24	24	23	24							28.2158	28.302	28.1268	27.6638	27.4574	27.4413	28.2158	28.302	28.1268	27.6638	27.4574	27.4413	28.2167	27.5244	0.00310434	0.00450747	-0.69221	0.000321733	3.4925	0.0063114	2.19987
A0A0H3C7R6	A0A0H3C7R6_CAUVN			Uncharacterized protein	0.00978474	1	1	1	1	1	1	1							17.3069	20.5873	20.2803	20.7309	20.5012	20.3039	17.3069	20.5873	20.2803	20.7309	20.5012	20.3039	19.9368	20.5226	0.0934344	0.0104198	0.585788	0.265957	0.575189	0.401721	0.396076
A0A0H3C7R7	A0A0H3C7R7_CAUVN			Penicillin-binding protein	0.00134998	2	1	1	2	1	1	1							21.6751	21.2301	20.8581	21.1815	21.2063	20.496	21.6751	21.2301	20.8581	21.1815	21.2063	20.496	21.2931	20.9966	0.0192451	0.0192329	-0.296556	0.350948	0.454757	0.483263	0.315816
A0A0H3C7R8	A0A0H3C7R8_CAUVN			Enoyl-CoA hydratase	0.000348797	5	5	4	4	3	5	3							23.4628	23.4631	23.2793	22.8462	22.6379	22.7689	23.4628	23.4631	23.2793	22.8462	22.6379	22.7689	23.4043	22.7536	0.00453206	0.00463014	-0.650727	0.000419722	3.37704	0.00712348	2.14731
A0A0H3C7R9	A0A0H3C7R9_CAUVN			Proline iminopeptidase	0.000348797	14	14	13	13	12	13	13							24.1564	24.0134	23.9196	23.7745	23.9015	24.3744	24.1564	24.0134	23.9196	23.7745	23.9015	24.3744	24.0331	24.0406	0.00496058	0.0131616	0.00746923	0.942562	0.0256901	0.959717	0.0178569
A0A0H3C7S0	A0A0H3C7S0_CAUVN			Fe-S cluster assembly ABC-type transport system, permease and ATPase components	0.000348797	14	14	14	13	14	13	14							24.6832	24.8918	24.8165	25.1055	25.0419	25.083	24.6832	24.8918	24.8165	25.1055	25.0419	25.083	24.7997	25.0771	0.00426119	0.00128595	0.277315	0.00834407	2.07862	0.0408828	1.38846
A0A0H3C7S1	A0A0H3C7S1_CAUVN			Glucose / sorbosone dehydrogenase	0.000348797	34	31	31	33	30	31	32							28.8828	28.9628	29.2797	29.2456	29.0555	29.2144	28.8828	28.9628	29.2797	29.2456	29.0555	29.2144	29.0521	29.1742	0.00722741	0.00349501	0.122058	0.335151	0.47476	0.468744	0.329064
A0A0H3C7S2	A0A0H3C7S2_CAUVN			Ring hydroxylating diooxygenase	0.000348797	11	11	11	11	11	10	11							25.35	25.4097	25.5279	25.3169	25.2161	25.2037	25.35	25.4097	25.5279	25.3169	25.2161	25.2037	25.4311	25.2465	0.00356026	0.00245932	-0.184658	0.041113	1.38602	0.113117	0.946473
A0A0H3C7S4	A0A0H3C7S4_CAUVN			1-acyl-sn-glycerol-3-phosphate acyltransferase	0.000348797	7	7	7	7	7	7	6							23.257	23.3332	23.4703	23.3793	23.2155	23.4178	23.257	23.3332	23.4703	23.3793	23.2155	23.4178	23.3562	23.3402	0.00462796	0.00460362	-0.016087	0.860024	0.0654895	0.90307	0.0442787
A0A0H3C7S5	A0A0H3C7S5_CAUVN			Type I secretion outer membrane protein rsaFb	0.000348797	36	36	36	36	36	35	36							30.4941	30.4812	30.3701	30.6943	30.7011	30.6311	30.4941	30.4812	30.3701	30.6943	30.7011	30.6311	30.4495	30.6758	0.00223817	0.00125848	0.226301	0.00918614	2.03687	0.0428923	1.36762
A0A0H3C7S9	A0A0H3C7S9_CAUVN			FeS assembly protein SufD	0.000348797	17	17	17	16	15	15	17							27.0646	27.0869	27.1098	27.1516	27.166	27.1613	27.0646	27.0869	27.1098	27.1516	27.166	27.1613	27.0872	27.1596	0.000836092	0.000270457	0.0724009	0.156086	0.806636	0.277048	0.557444
A0A0H3C7T0	A0A0H3C7T0_CAUVN			TonB-dependent receptor	0.000348797	87	85	87	87	87	86	86							33.2284	33.2063	33.1212	33.3678	33.3099	33.3813	33.2284	33.2063	33.1212	33.3678	33.3099	33.3813	33.186	33.3533	0.00170472	0.00113668	0.167258	0.0242261	1.61572	0.0823742	1.08421
A0A0H3C7T1	A0A0H3C7T1_CAUVN			Amidase family protein	0.000348797	17	17	17	17	14	13	15							25.8386	25.9688	25.5994	24.1392	24.0333	24.3789	25.8386	25.9688	25.5994	24.1392	24.0333	24.3789	25.8103	24.1911	0.00726169	0.00732035	-1.61915	3.97127e-05	4.40107	0.00197884	2.70359
A0A0H3C7T2	A0A0H3C7T2_CAUVN			Peptidoglycan-associated outer membrane lipoprotein	0.000348797	21	21	21	20	15	19	18							26.2513	26.1744	26.0198	25.5693	25.4465	25.3585	26.2513	26.1744	26.0198	25.5693	25.4465	25.3585	26.1517	25.4607	0.0045088	0.00415766	-0.690971	0.000389572	3.40941	0.00676378	2.16981
A0A0H3C7T3	A0A0H3C7T3_CAUVN			Sulfur carrier protein FdhD	0.000348797	13	13	12	12	11	12	11							24.0405	24.15	24.1504	24.3188	24.0255	23.9858	24.0405	24.15	24.1504	24.3188	24.0255	23.9858	24.1146	24.1178	0.00262611	0.00754335	0.00323315	0.973307	0.01175	0.981429	0.00814106
A0A0H3C7T4	A0A0H3C7T4_CAUVN			Rrf2 family protein	0.000348797	4	3	3	3	3	3	3							23.9043	23.7638	23.7857	23.9601	23.7913	24.0477	23.9043	23.7638	23.7857	23.9601	23.7913	24.0477	23.8193	23.9369	0.0031743	0.00544648	0.117664	0.233157	0.632351	0.365906	0.436631
A0A0H3C7T5	A0A0H3C7T5_CAUVN			DNA polymerase III epsilon-like protein	0.000348797	3	2	1	3	2	2	2							21.5444	20.9325	21.8908	21.3408	21.6124	20.6709	21.5444	20.9325	21.8908	21.3408	21.6124	20.6709	21.5082	21.2596	0.0226154	0.0228486	-0.248649	0.498747	0.30212	0.618129	0.208921
A0A0H3C7T8	A0A0H3C7T8_CAUVN			50S ribosomal protein L3	0.000348797	38	34	34	34	36	33	35							30.7503	30.7168	30.8373	30.9224	30.8125	30.9335	30.7503	30.7168	30.8373	30.9224	30.8125	30.9335	30.769	30.8905	0.00202176	0.00216436	0.121486	0.103071	0.986865	0.209399	0.679025
A0A0H3C7U0	A0A0H3C7U0_CAUVN			DNA helicase	0.000348797	35	29	30	29	29	28	29							26.5522	26.6481	26.7293	26.8851	26.647	26.8653	26.5522	26.6481	26.7293	26.8851	26.647	26.8653	26.645	26.8031	0.00332786	0.00492996	0.158058	0.137136	0.862849	0.253387	0.596216
A0A0H3C7U1	A0A0H3C7U1_CAUVN			Type-4 uracil-DNA glycosylase	0.000348797	6	6	5	4	5	5	5							23.6129	23.8219	23.0799	23.2913	23.2507	23.4304	23.6129	23.8219	23.0799	23.2913	23.2507	23.4304	23.5374	23.3262	0.0162782	0.0040408	-0.211196	0.403461	0.394199	0.531275	0.274681
A0A0H3C7U2	A0A0H3C7U2_CAUVN			Histidine kinase	0.000348797	18	18	17	17	15	18	17							24.9819	24.9523	25.0916	24.8993	25.0457	25.0165	24.9819	24.9523	25.0916	24.8993	25.0457	25.0165	25.0098	24.9885	0.00293385	0.00310133	-0.021317	0.763551	0.117162	0.828551	0.0816807
A0A0H3C7U3	A0A0H3C7U3_CAUVN			ABC2-family membrane transporter	0.000348797	4	4	4	3	3	4	3							23.887	23.2312	23.2659	23.5654	23.4804	23.3936	23.887	23.2312	23.2659	23.5654	23.4804	23.3936	23.4942	23.4815	0.015729	0.00365742	-0.0126931	0.927172	0.0328397	0.951422	0.0216268
A0A0H3C7U4	A0A0H3C7U4_CAUVN			Zinc metalloprotease	0.000348797	30	30	27	29	28	29	27							26.0402	25.807	26.0462	26.2828	26.3036	26.0709	26.0402	25.807	26.0462	26.2828	26.3036	26.0709	25.9687	26.2229	0.00525352	0.00491225	0.254195	0.0509929	1.29249	0.131554	0.880896
A0A0H3C7U6	A0A0H3C7U6_CAUVN			Uncharacterized protein	0.000348797	10	10	10	10	9	10	10							26.3764	26.5339	26.2318	26.6552	26.7045	26.0345	26.3764	26.5339	26.2318	26.6552	26.7045	26.0345	26.386	26.4952	0.00572711	0.014108	0.109233	0.695931	0.157434	0.77919	0.108357
A0A0H3C7U8	A0A0H3C7U8_CAUVN			Nitrogen regulatory protein P-II	0.000348797	12	12	11	12	10	11	11							28.924	29.082	29.5677	28.9589	28.7379	28.9085	28.924	29.082	29.5677	28.9589	28.7379	28.9085	29.218	28.8715	0.011492	0.00401192	-0.346463	0.129414	0.888019	0.24435	0.611988
A0A0H3C7V0	A0A0H3C7V0_CAUVN			Uncharacterized protein	0.000348797	11	11	11	11	11	11	11							26.0169	26.0038	25.8726	26.0835	25.8413	25.9204	26.0169	26.0038	25.8726	26.0835	25.8413	25.9204	25.9659	25.9519	0.00307382	0.00476015	-0.0139502	0.85587	0.0675923	0.899646	0.0459283
A0A0H3C7V1	A0A0H3C7V1_CAUVN			TetR-family transcriptional regulator	0.000348797	8	8	7	7	5	6	7							23.6681	23.9168	23.9035	23.624	23.8817	23.8861	23.6681	23.9168	23.9035	23.624	23.8817	23.8861	23.8339	23.8024	0.00587215	0.00630599	-0.0315283	0.780829	0.107444	0.843966	0.0736749
A0A0H3C7V2	A0A0H3C7V2_CAUVN			Phosphohydrolase, MutT/nudix family	0.00332889	1	0	1	0	1	1	1							NA	18.876	NA	19.479	18.6117	17.831	20.0429	18.876	20.0653	19.479	18.6117	17.831	19.7572	18.795	0.0346001	0.0442253	-0.96225	0.10776	0.967544	0.216715	0.66411
A0A0H3C7V3	A0A0H3C7V3_CAUVN			Uncharacterized protein	0.000348797	4	4	4	4	4	4	4							24.8875	24.8711	24.6141	24.7437	24.3781	24.9319	24.8875	24.8711	24.6141	24.7437	24.3781	24.9319	24.7962	24.7025	0.00618629	0.0114084	-0.0937286	0.543908	0.264475	0.655946	0.183132
A0A0H3C7V4	MREB_CAUVN			Cell shape-determining protein MreB	0.000348797	42	41	40	36	38	40	38							29.7752	29.6771	29.7102	29.8566	29.8511	29.9329	29.7752	29.6771	29.7102	29.8566	29.8511	29.9329	29.7214	29.8807	0.00168026	0.00153161	0.159257	0.0289567	1.53825	0.091349	1.0393
A0A0H3C7V7	A0A0H3C7V7_CAUVN			3-hydroxyisobutyryl-CoA hydrolase	0.000348797	26	19	19	17	17	18	18							26.0481	26.0413	26.074	26.2617	26.0699	26.1141	26.0481	26.0413	26.074	26.2617	26.0699	26.1141	26.0546	26.1509	0.0006626	0.00384078	0.0963521	0.208466	0.680965	0.337862	0.47126
A0A0H3C7V8	A0A0H3C7V8_CAUVN			Aspartate--tRNA(Asp/Asn) ligase	0.000348797	41	39	37	38	36	39	39							28.9143	28.8743	29.0094	28.938	28.9319	28.9955	28.9143	28.8743	29.0094	28.938	28.9319	28.9955	28.9338	28.9554	0.00239783	0.00121206	0.0216506	0.709734	0.148904	0.787406	0.103801
A0A0H3C7V9	A0A0H3C7V9_CAUVN			Myo-inositol 2-dehydrogenase IdhA	0.000348797	32	18	17	18	16	15	14							25.1918	25.2255	27.1164	27.5619	24.8558	24.8962	25.1918	25.2255	27.1164	27.5619	24.8558	24.8962	26.1478	26.3674	0.0426231	0.0601754	0.219595	0.940855	0.0264775	0.958948	0.018205
A0A0H3C7W0	A0A0H3C7W0_CAUVN			Type-5 uracil-DNA glycosylase	0.000348797	18	16	16	15	16	16	15							25.4583	25.3763	25.3326	25.3723	25.4048	25.4907	25.4583	25.3763	25.3326	25.3723	25.4048	25.4907	25.39	25.4235	0.00251346	0.00240746	0.0334361	0.604461	0.218632	0.709708	0.148921
A0A0H3C7W1	A0A0H3C7W1_CAUVN			Uncharacterized protein	0.000348797	5	5	4	5	4	4	3							22.9214	21.4181	22.3463	22.2941	21.7128	21.6745	22.9214	21.4181	22.3463	22.2941	21.7128	21.6745	22.3536	21.9228	0.0341238	0.0158586	-0.430867	0.45373	0.343202	0.575691	0.239811
A0A0H3C7W2	A0A0H3C7W2_CAUVN			Serine hydroxymethyltransferase	0.000348797	42	37	37	41	41	39	39							29.6223	29.6197	29.6179	29.9509	29.742	29.7717	29.6223	29.6197	29.6179	29.9509	29.742	29.7717	29.62	29.8245	7.41271e-05	0.00378999	0.204535	0.031785	1.49778	0.0968946	1.0137
A0A0H3C7W3	A0A0H3C7W3_CAUVN			Anthranilate synthase component II/para-aminobenzoate synthase glutamine amidotransferase component II	0.000348797	4	4	4	4	4	4	4							24.9544	25.061	24.8058	24.7797	25.1389	24.8852	24.9544	25.061	24.8058	24.7797	25.1389	24.8852	24.9442	24.9426	0.00513927	0.00740333	-0.00160088	0.962806	0.0164612	0.973765	0.0115457
A0A0H3C7W4	A0A0H3C7W4_CAUVN			Myo-inositol catabolism protein IolB	0.000348797	8	4	4	3	2	3	4							23.0977	22.9075	22.3954	22.1244	22.4144	22.6377	23.0977	22.9075	22.3954	22.1244	22.4144	22.6377	22.8295	22.4073	0.0159318	0.0114932	-0.422187	0.123964	0.906706	0.23819	0.623076
A0A0H3C7W5	A0A0H3C7W5_CAUVN			Aminobenzoyl-glutamate utilization protein B	0.000348797	10	10	10	10	8	9	8							24.0649	24.277	24.4403	23.0594	23.4217	23.8854	24.0649	24.277	24.4403	23.0594	23.4217	23.8854	24.2689	23.4953	0.00775944	0.0176513	-0.773593	0.0147956	1.82987	0.0591235	1.22824
A0A0H3C7W7	A0A0H3C7W7_CAUVN			Single domain receiver protein CleB	0.000348797	6	6	6	6	2	1	2							22.1163	21.9486	21.8137	20.2707	17.1343	18.7336	22.1163	21.9486	21.8137	20.2707	17.1343	18.7336	21.9649	19.23	0.00690146	0.0838094	-2.73483	0.00737777	2.13207	0.0376491	1.42425
A0A0H3C7W8	A0A0H3C7W8_CAUVN			Alkaline phosphatase	0.000348797	22	17	19	19	22	22	20							25.1101	25.382	25.4464	26.7668	27.011	26.0159	25.1101	25.382	25.4464	26.7668	27.011	26.0159	25.32	26.6562	0.00705107	0.0194978	1.33618	0.00439107	2.35743	0.0265748	1.57553
A0A0H3C7W9	A0A0H3C7W9_CAUVN			DNA translocation competence protein ComA	0.0010142	2	2	1	2	1	1	2							20.5063	18.9613	20.0911	18.5235	18.0155	20.2954	20.5063	18.9613	20.0911	18.5235	18.0155	20.2954	19.9866	19.2942	0.0402742	0.0631789	-0.692435	0.254954	0.593538	0.390378	0.408515
A0A0H3C7X0	A0A0H3C7X0_CAUVN			tRNA-dihydrouridine(20/20a) synthase	0.000348797	13	11	12	12	11	13	11							25.3829	25.4783	25.3132	25.5336	25.5263	25.5592	25.3829	25.4783	25.3132	25.5336	25.5263	25.5592	25.3931	25.5398	0.00326425	0.000675505	0.146729	0.0515819	1.2875	0.13262	0.87739
A0A0H3C7X1	A0A0H3C7X1_CAUVN	A0A0H3C7X1;A0A0H3C4Q0; A0A0H3C5N8		Flagellin	NA	6	6	6	6	6	6	6	3	3	3	3	3	3	26.2523	26.3023	26.1808	25.4412	25.3756	25.5724	26.2523	26.3023	26.1808	25.4412	25.3756	25.5724	26.246	25.4654	0.00232612	0.00393616	-0.78057	6.7862e-05	4.16837	0.00280837	2.55155
A0A0H3C7X2	A0A0H3C7X2_CAUVN			3-oxoacyl-[acyl-carrier-protein] synthase 3	0.000348797	20	20	20	20	20	20	20							27.0998	27.1258	27.1086	27.1726	27.0804	27.1901	27.0998	27.1258	27.1086	27.1726	27.0804	27.1901	27.1114	27.1485	0.000486619	0.00217229	0.0370453	0.513536	0.289429	0.630904	0.200037
A0A0H3C7X3	A0A0H3C7X3_CAUVN			2-nitropropane dioxygenase family protein	0.000348797	16	16	16	15	10	12	13							25.3497	25.2677	25.1755	25.0938	24.9305	24.9875	25.3497	25.2677	25.1755	25.0938	24.9305	24.9875	25.266	25.0055	0.00345066	0.00331396	-0.260503	0.0140587	1.85206	0.0569319	1.24464
A0A0H3C7X4	A0A0H3C7X4_CAUVN			Lipid-A-disaccharide synthase	0.000348797	20	20	20	20	19	20	19							25.7541	25.5121	25.4536	25.4359	25.4523	25.3856	25.7541	25.5121	25.4536	25.4359	25.4523	25.3856	25.5792	25.4249	0.00622853	0.00136849	-0.154342	0.159255	0.797907	0.281186	0.551006
A0A0H3C7X5	A0A0H3C7X5_CAUVN			Acyl-CoA dehydrogenase, short-chain specific	0.000348797	24	24	24	22	22	23	23							27.7543	27.8592	27.6867	27.1764	26.9723	27.39	27.7543	27.8592	27.6867	27.1764	26.9723	27.39	27.7685	27.1896	0.00313011	0.00768491	-0.578838	0.00354558	2.45031	0.0235411	1.62817
A0A0H3C7X7	A0A0H3C7X7_CAUVN	A0A0H3C9L1;A0A0H3C7X7	CCNA_00839;celD	Beta-glucosidase	0.000348797	59	59	57	58	54	53	52	2	2	3	3	2	3	30.5917	30.5214	30.5948	29.8746	29.7536	29.8012	30.5917	30.5214	30.5948	29.8746	29.7536	29.8012	30.5697	29.8107	0.00135843	0.00204476	-0.759023	2.11168e-05	4.67537	0.00148358	2.82869
A0A0H3C7X8	A0A0H3C7X8_CAUVN			50S ribosomal protein L13	0.000348797	19	19	19	19	18	18	18							29.7833	29.784	30.0851	30.2125	30.0315	30.0812	29.7833	29.784	30.0851	30.2125	30.0315	30.0812	29.8913	30.1105	0.00582321	0.00310554	0.219156	0.0848293	1.07145	0.184499	0.734005
A0A0H3C7Y0	A0A0H3C7Y0_CAUVN			Lactoylglutathione lyase	0.000348797	14	14	14	14	14	14	14							27.0778	27.0858	27.0767	27.4593	27.5118	27.3418	27.0778	27.0858	27.0767	27.4593	27.5118	27.3418	27.0801	27.4394	0.000184482	0.0031723	0.359274	0.00148123	2.82938	0.0142057	1.84754
A0A0H3C7Y1	A0A0H3C7Y1_CAUVN			Peptidyl-prolyl cis-trans isomerase	0.000348797	19	19	18	18	18	19	19							28.8358	28.7906	28.8071	29.1445	28.9837	28.9008	28.8358	28.7906	28.8071	29.1445	28.9837	28.9008	28.8113	29.0132	0.00079398	0.0042706	0.201914	0.042837	1.36818	0.116586	0.933354
A0A0H3C7Y2	A0A0H3C7Y2_CAUVN			Toxin protein relE1	0.00332889	1	1	1	1	1	1	1							19.2409	19.2159	18.9818	18.9643	19.5415	19.2658	19.2409	19.2159	18.9818	18.9643	19.5415	19.2658	19.1508	19.2763	0.00746482	0.0149931	0.125505	0.528724	0.276771	0.644323	0.190897
A0A0H3C7Y3	A0A0H3C7Y3_CAUVN			Homoserine dehydrogenase	0.000348797	13	12	12	12	13	13	12							28.0346	27.9626	28.0232	28.2438	28.1692	28.1465	28.0346	27.9626	28.0232	28.2438	28.1692	28.1465	28.0071	28.1871	0.00138071	0.00180687	0.180002	0.0169955	1.76967	0.0650741	1.18659
A0A0H3C7Y4	A0A0H3C7Y4_CAUVN			Pole-organizing protein popZ	0.000348797	6	6	6	6	6	5	6							26.479	26.4972	26.473	26.6604	26.3822	26.4638	26.479	26.4972	26.473	26.6604	26.3822	26.4638	26.4831	26.5069	0.000474929	0.00539481	0.0237973	0.826318	0.082853	0.876512	0.0572423
A0A0H3C7Y5	A0A0H3C7Y5_CAUVN			Inosine-uridine nucleoside N-ribohydrolase	0.000348797	15	14	13	15	12	13	13							25.0338	24.7457	24.8977	24.9295	24.7154	24.9121	25.0338	24.7457	24.8977	24.9295	24.7154	24.9121	24.8972	24.8555	0.0057901	0.00478507	-0.0416418	0.70876	0.149501	0.786617	0.104237
A0A0H3C7Y7	A0A0H3C7Y7_CAUVN			Outer membrane efflux protein	0.000348797	32	28	24	25	28	28	31							27.3623	27.1899	26.8739	27.966	28.1108	28.3576	27.3623	27.1899	26.8739	27.966	28.1108	28.3576	27.156	28.1539	0.00912581	0.00703489	0.997973	0.00120192	2.92013	0.0128303	1.89176
A0A0H3C7Y8	A0A0H3C7Y8_CAUVN			rRNA methylase	0.000348797	8	7	6	5	8	6	6							23.047	23.1292	23.1848	23.2156	23.2758	23.1347	23.047	23.1292	23.1848	23.2156	23.2758	23.1347	23.1215	23.2099	0.00299852	0.00305053	0.088405	0.226913	0.64414	0.358715	0.44525
A0A0H3C7Y9	A0A0H3C7Y9_CAUVN			Sulfate/thiosulfate import ATP-binding protein CysA	0.000348797	21	19	20	20	19	20	21							26.9385	26.9441	27.1135	27.1441	27.0232	27.244	26.9385	26.9441	27.1135	27.1441	27.0232	27.244	27.001	27.1399	0.00368378	0.0040746	0.138918	0.159561	0.797072	0.281562	0.550425
A0A0H3C7Z0	A0A0H3C7Z0_CAUVN			Uncharacterized protein	0.000348797	9	9	8	8	7	7	9							25.1568	24.7715	24.9832	24.3166	24.6041	24.6532	25.1568	24.7715	24.9832	24.3166	24.6041	24.6532	24.9791	24.5321	0.00772712	0.00741388	-0.446992	0.0205022	1.6882	0.0740233	1.13063
A0A0H3C7Z1	A0A0H3C7Z1_CAUVN			Methylmalonyl CoA epimerase	0.000348797	10	10	8	9	8	8	8							26.8578	26.9001	26.9045	26.3399	26.4449	26.3297	26.8578	26.9001	26.9045	26.3399	26.4449	26.3297	26.8876	26.3724	0.000958722	0.00241768	-0.515192	0.000138157	3.85963	0.00409187	2.38808
A0A0H3C7Z2	A0A0H3C7Z2_CAUVN			Metallo-beta-lactamase protein	0.000348797	10	10	10	10	7	7	8							23.34	23.3305	23.2464	22.7381	23.1914	22.9186	23.34	23.3305	23.2464	22.7381	23.1914	22.9186	23.3062	22.9615	0.0022106	0.00994455	-0.344704	0.0310582	1.50782	0.0956441	1.01934
A0A0H3C7Z3	A0A0H3C7Z3_CAUVN			Autotransporter assembly factor TamA	0.000348797	34	34	34	33	32	34	34							26.6759	26.6132	26.6651	26.7592	26.7141	26.665	26.6759	26.6132	26.6651	26.7592	26.7141	26.665	26.6516	26.7133	0.00125807	0.00176319	0.0616318	0.280277	0.552413	0.414925	0.382031
A0A0H3C7Z6	A0A0H3C7Z6_CAUVN			NADH-quinone oxidoreductase chain M	0.000348797	2	2	2	2	2	2	2							22.5509	22.5912	22.5777	21.9274	22.6757	22.8538	22.5509	22.5912	22.5777	21.9274	22.6757	22.8538	22.5733	22.5379	0.000908212	0.0218615	-0.0354294	0.736432	0.132867	0.809593	0.0917332
A0A0H3C7Z7	A0A0H3C7Z7_CAUVN			Acetyltransferase, GNAT family	0.000348797	16	16	15	15	16	16	16							26.2429	26.2522	26.2149	26.2507	26.1589	26.2289	26.2429	26.2522	26.2149	26.2507	26.1589	26.2289	26.2368	26.2133	0.000740091	0.00182998	-0.0234395	0.648882	0.187834	0.744219	0.128299
A0A0H3C7Z8	A0A0H3C7Z8_CAUVN			N-succinylarginine dihydrolase	0.000348797	26	18	16	15	14	15	17							25.7309	25.5261	25.5549	25.6568	25.4996	25.6346	25.7309	25.5261	25.5549	25.6568	25.4996	25.6346	25.6068	25.5986	0.00432986	0.00332449	-0.00821441	0.934435	0.029451	0.954947	0.0200209
A0A0H3C7Z9	A0A0H3C7Z9_CAUVN			Electron transfer flavoprotein-ubiquinone oxidoreductase	0.000348797	40	38	39	37	37	40	37							28.2471	28.3471	28.1857	27.9866	28.1453	28.0578	28.2471	28.3471	28.1857	27.9866	28.1453	28.0578	28.2615	28.0647	0.00288388	0.00283169	-0.196809	0.0351339	1.45427	0.102948	0.987382
A0A0H3C800	A0A0H3C800_CAUVN			Methyl-accepting chemotaxis protein	0.000348797	13	10	13	13	11	10	11							22.9205	23.9094	23.8964	22.737	23.2839	23.0113	22.9205	23.9094	23.8964	22.737	23.2839	23.0113	23.6434	23.0279	0.0240602	0.0118844	-0.615477	0.127831	0.893365	0.242841	0.614677
A0A0H3C801	A0A0H3C801_CAUVN			Alpha-ketoglutaric semialdehyde dehydrogenase xylA	0.000348797	4	4	3	4	2	2	3							22.7074	21.6839	22.2611	19.5889	19.8586	21.3616	22.7074	21.6839	22.2611	19.5889	19.8586	21.3616	22.2768	20.4951	0.0230961	0.0471225	-1.7817	0.0131754	1.88023	0.05444	1.26408
A0A0H3C802	A0A0H3C802_CAUVN			NADH-quinone oxidoreductase subunit H	0.000348797	4	4	4	3	2	3	4							22.5491	22.8829	22.7124	22.2223	22.9901	22.8272	22.5491	22.8829	22.7124	22.2223	22.9901	22.8272	22.7212	22.7158	0.00734794	0.0178373	-0.00547169	0.879872	0.0555807	0.916583	0.037828
A0A0H3C803	A0A0H3C803_CAUVN			Hemimethylated DNA-binding protein yccV	0.0010142	1	1	1	1	1	1	1							21.8512	21.8496	21.7145	22.0902	21.9569	21.8958	21.8512	21.8496	21.7145	22.0902	21.9569	21.8958	21.8065	21.9833	0.00359906	0.00452288	0.176794	0.0636092	1.19648	0.152499	0.816732
A0A0H3C804	A0A0H3C804_CAUVN			Glycine--tRNA ligase beta subunit	0.000348797	58	55	55	54	56	55	54							28.9619	28.8785	28.8654	28.9277	28.9855	29.016	28.9619	28.8785	28.8654	28.9277	28.9855	29.016	28.9026	28.9769	0.00181045	0.00154836	0.0743042	0.225344	0.647154	0.356982	0.447354
A0A0H3C805	A0A0H3C805_CAUVN			Carbon-nitrogen hydrolase family protein	0.000348797	13	12	13	13	13	13	13							25.668	25.5665	25.6233	25.8238	25.806	25.9059	25.668	25.5665	25.6233	25.8238	25.806	25.9059	25.6199	25.8459	0.00198415	0.00206173	0.226044	0.00835252	2.07818	0.0408828	1.38846
A0A0H3C806	A0A0H3C806_CAUVN			Cbb3-type cytochrome c oxidase subunit	0.000348797	3	3	3	3	1	1	0							21.7243	22.1296	21.6892	18.4059	20.4559	NA	21.7243	22.1296	21.6892	18.4059	20.4559	20.9685	21.862	20.2867	0.0112035	0.0679926	-1.57523	0.0352094	1.45334	0.10307	0.98687
A0A0H3C807	A0A0H3C807_CAUVN			MAPEG family membrane protein	0.000348797	3	3	3	3	3	3	3							22.1203	21.6342	21.7497	22.0571	22.3302	22.4794	22.1203	21.6342	21.7497	22.0571	22.3302	22.4794	21.85	22.2993	0.0116318	0.00960678	0.449319	0.0405393	1.39212	0.112239	0.949856
A0A0H3C808	A0A0H3C808_CAUVN			NADH-quinone oxidoreductase chain E	0.000348797	27	27	27	27	26	26	26							28.9733	28.9071	28.9683	29.2283	29.1301	29.0626	28.9733	28.9071	28.9683	29.2283	29.1301	29.0626	28.9499	29.1419	0.00127449	0.00285942	0.192052	0.0246149	1.6088	0.083076	1.08052
A0A0H3C809	A0A0H3C809_CAUVN			Delta-aminolevulinic acid dehydratase	0.000348797	18	16	16	16	17	17	18							25.8293	25.7265	25.7058	25.8207	25.6774	25.7974	25.8293	25.7265	25.7058	25.8207	25.6774	25.7974	25.7549	25.7665	0.00256777	0.00298334	0.0116246	0.869859	0.0605511	0.910549	0.0406967
A0A0H3C810	A0A0H3C810_CAUVN			7,8-dihydro-8-oxoguanine-triphosphatase	0.000348797	10	10	9	9	9	9	10							24.8531	24.6077	24.9394	24.9671	25.026	25.0306	24.8531	24.6077	24.9394	24.9671	25.026	25.0306	24.8068	25.0082	0.00693929	0.0014164	0.201388	0.0800876	1.09643	0.178294	0.748864
A0A0H3C811	A0A0H3C811_CAUVN			OmpW family outer membrane cation channel	0.000348797	14	14	14	13	10	7	12							26.0887	26.0628	24.9233	23.3873	22.1583	24.2839	26.0887	26.0628	24.9233	23.3873	22.1583	24.2839	25.7836	23.5197	0.0259039	0.045846	-2.2639	0.00998288	2.00074	0.0452004	1.34486
A0A0H3C813	A0A0H3C813_CAUVN			Methyltransferase	0.000348797	22	20	20	21	20	20	21							28.093	28.0155	28.0794	28.0775	28.1064	28.0663	28.093	28.0155	28.0794	28.0775	28.1064	28.0663	28.063	28.0835	0.00147466	0.000736008	0.020506	0.682918	0.165631	0.769812	0.113616
A0A0H3C814	A0A0H3C814_CAUVN			NADH-quinone oxidoreductase subunit A	0.000348797	2	2	2	2	2	2	2							22.8148	22.907	22.9928	22.9988	23.1554	23.1789	22.8148	22.907	22.9928	22.9988	23.1554	23.1789	22.9067	23.1132	0.0038848	0.00423795	0.206538	0.0422605	1.37407	0.115642	0.936884
A0A0H3C815	A0A0H3C815_CAUVN			Uncharacterized protein	0.000348797	12	10	10	11	10	9	11							27.3076	27.1955	27.5398	27.5272	27.4251	27.5169	27.3076	27.1955	27.5398	27.5272	27.4251	27.5169	27.3548	27.4905	0.00642077	0.00204474	0.135621	0.212575	0.672488	0.342555	0.465269
A0A0H3C816	A0A0H3C816_CAUVN			ABC transporter ATP-binding protein	0.000348797	12	12	12	12	10	11	12							24.9674	25.0801	24.9983	24.3791	24.7409	25.0831	24.9674	25.0801	24.9983	24.3791	24.7409	25.0831	25.0161	24.7628	0.00232756	0.014234	-0.253281	0.177992	0.749599	0.304144	0.51692
A0A0H3C817	A0A0H3C817_CAUVN			Xylose isomerase family protein	0.000348797	12	12	12	12	8	8	9							24.4238	24.4211	23.9903	22.3599	22.4801	22.7851	24.4238	24.4211	23.9903	22.3599	22.4801	22.7851	24.2923	22.553	0.010276	0.00972447	-1.73927	9.31427e-05	4.03085	0.00327191	2.4852
A0A0H3C818	A0A0H3C818_CAUVN			Uncharacterized protein	0.000348797	3	3	3	3	2	2	3							22.574	22.0876	21.7074	21.0398	22.0026	22.7511	22.574	22.0876	21.7074	21.0398	22.0026	22.7511	22.1668	22.0926	0.0196364	0.0391181	-0.0742122	0.703374	0.152814	0.784382	0.105472
A0A0H3C819	A0A0H3C819_CAUVN			6,7-dimethyl-8-ribityllumazine synthase	0.000348797	17	16	17	16	16	16	15							28.1399	28.1088	28.1535	28.411	28.2386	28.2895	28.1399	28.1088	28.1535	28.411	28.2386	28.2895	28.1342	28.3149	0.00081344	0.00312753	0.180662	0.0312435	1.50524	0.0959214	1.01808
A0A0H3C820	A0A0H3C820_CAUVN			Acetyl-coenzyme A synthetase	0.000348797	5	3	4	3	2	4	3							21.1978	21.2384	21.1131	20.9387	20.9998	20.7197	21.1978	21.2384	21.1131	20.9387	20.9998	20.7197	21.184	20.891	0.00301698	0.00705233	-0.293055	0.0190254	1.72067	0.069922	1.15539
A0A0H3C821	A0A0H3C821_CAUVN			Fumarylacetoacetate (FAA) hydrolase family protein	0.000348797	8	7	5	7	6	6	7							23.0833	22.9806	22.9235	23.1129	23.029	23.1398	23.0833	22.9806	22.9235	23.1129	23.029	23.1398	22.9973	23.0947	0.00352234	0.00250268	0.0973228	0.187226	0.727633	0.313705	0.503478
A0A0H3C822	A0A0H3C822_CAUVN			BetA-family choline dehydrogenase	0.000348797	12	12	11	10	8	8	7							24.003	24.1027	23.7185	22.9412	22.8886	22.9635	24.003	24.1027	23.7185	22.9412	22.8886	22.9635	23.9504	22.9314	0.00832723	0.00167776	-1.01897	0.000156042	3.80676	0.0044472	2.35191
A0A0H3C823	A0A0H3C823_CAUVN			Phosphoenolpyruvate--protein phosphotransferase	0.000348797	38	38	37	37	37	36	37							27.8391	27.8345	27.7518	27.7918	27.7531	27.7883	27.8391	27.8345	27.7518	27.7918	27.7531	27.7883	27.809	27.7779	0.00176767	0.000769466	-0.031162	0.564384	0.248425	0.675785	0.170192
A0A0H3C824	A0A0H3C824_CAUVN			Imidazolonepropionase related amidohydrolase	0.000348797	61	48	42	46	35	36	38							27.3766	27.3406	27.5549	26.8575	26.7337	26.943	27.3766	27.3406	27.5549	26.8575	26.7337	26.943	27.4272	26.8473	0.00418442	0.00391975	-0.579876	0.000873046	3.05896	0.0109982	1.95868
A0A0H3C825	A0A0H3C825_CAUVN			Cystathionine beta-lyase	0.000348797	15	15	15	14	14	14	14							25.8748	25.8758	25.8338	25.7113	25.6615	25.7785	25.8748	25.8758	25.8338	25.7113	25.6615	25.7785	25.8616	25.7179	0.00092534	0.00228205	-0.143715	0.0375706	1.42515	0.107482	0.968665
A0A0H3C826	A0A0H3C826_CAUVN			Beta-barrel assembly machine (BAM) protein BamE	0.000348797	18	17	16	16	17	17	15							27.7926	27.7474	27.6668	27.8675	27.7019	27.7433	27.7926	27.7474	27.6668	27.8675	27.7019	27.7433	27.7366	27.7726	0.00229703	0.00310193	0.0360723	0.624032	0.204793	0.725511	0.139356
A0A0H3C829	A0A0H3C829_CAUVN			ATP12 family chaperone protein	0.000348797	9	8	7	9	9	9	9							24.3897	24.3358	24.4166	24.4558	24.2749	24.4297	24.3897	24.3358	24.4166	24.4558	24.2749	24.4297	24.3811	24.389	0.00168718	0.00400913	0.00789028	0.93127	0.0309245	0.953683	0.0205957
A0A0H3C831	A0A0H3C831_CAUVN			ADP-L-glycero-D-manno-heptose-6-epimerase	0.000348797	20	20	19	18	19	17	19							25.9015	25.6895	25.589	25.9038	25.5985	25.7886	25.9015	25.6895	25.589	25.9038	25.5985	25.7886	25.7326	25.7691	0.00619944	0.00598436	0.036479	0.765129	0.116266	0.829965	0.0809401
A0A0H3C832	A0A0H3C832_CAUVN			MerR-family transcriptional regulator	0.000348797	3	2	3	2	2	2	3							21.6658	20.479	21.4679	20.768	20.9861	21.3429	21.6658	20.479	21.4679	20.768	20.9861	21.3429	21.2894	21.052	0.0299857	0.0137999	-0.237394	0.641142	0.193046	0.737582	0.13219
A0A0H3C834	A0A0H3C834_CAUVN			Inositol ABC transporter, periplasmic inositol-binding protein IbpA	0.000348797	29	19	20	17	14	13	13							25.1693	25.3437	25.4084	24.7209	24.1624	24.8519	25.1693	25.3437	25.4084	24.7209	24.1624	24.8519	25.3106	24.6079	0.00488762	0.0148981	-0.702727	0.0117796	1.92887	0.0505485	1.29629
A0A0H3C835	A0A0H3C835_CAUVN			DNA repair protein RecN	0.000348797	33	32	32	32	29	29	31							26.3202	26.3188	26.354	26.5358	26.3117	26.4323	26.3202	26.3188	26.354	26.5358	26.3117	26.4323	26.3311	26.4295	0.000758397	0.00424434	0.0983679	0.229366	0.639471	0.361647	0.441715
A0A0H3C836	A0A0H3C836_CAUVN			Short chain dehydrogenase	0.000348797	21	21	20	19	21	20	20							27.6808	27.6747	27.653	27.8831	27.7057	27.8201	27.6808	27.6747	27.653	27.8831	27.7057	27.8201	27.6696	27.8048	0.000527786	0.00323416	0.135287	0.0792779	1.10085	0.176848	0.7524
A0A0H3C837	A0A0H3C837_CAUVN			Uncharacterized protein	0.000348797	11	10	10	11	7	9	11							23.3384	23.1764	24.3237	23.1706	22.6597	23.1502	23.3384	23.1764	24.3237	23.1706	22.6597	23.1502	23.7071	23.012	0.0262952	0.0125804	-0.695011	0.124925	0.903349	0.239467	0.620755
A0A0H3C839	A0A0H3C839_CAUVN			Uncharacterized protein	0.000348797	6	6	5	6	5	6	5							24.2268	24.1676	24.1314	24.2187	24.0883	24.1072	24.2268	24.1676	24.1314	24.2187	24.0883	24.1072	24.1758	24.1392	0.00199203	0.00291987	-0.0365554	0.559962	0.251841	0.671821	0.172746
A0A0H3C840	A0A0H3C840_CAUVN			Fructose-1,6-bisphosphatase	0.000348797	26	25	26	25	25	23	25							27.931	27.9422	27.8835	27.7865	27.6798	27.7615	27.931	27.9422	27.8835	27.7865	27.6798	27.7615	27.9191	27.7433	0.00111701	0.00201249	-0.175845	0.0183115	1.73728	0.0681275	1.16668
A0A0H3C841	A0A0H3C841_CAUVN			Conserved membrane spanning protein	0.000348797	3	3	3	3	3	3	3							24.7435	24.8738	25.331	24.8361	24.851	24.9655	24.7435	24.8738	25.331	24.8361	24.851	24.9655	25.0054	24.8854	0.0123504	0.00284454	-0.120048	0.568152	0.245536	0.678413	0.168506
A0A0H3C842	A0A0H3C842_CAUVN			Cystine transport system permease protein	0.000348797	4	1	1	2	1	0	1							20.9622	20.9789	21.1196	20.248	NA	16.7138	20.9622	20.9789	21.1196	20.248	19.4509	16.7138	21.022	19.3958	0.00411513	0.0985802	-1.62615	0.056824	1.24547	0.141659	0.848756
A0A0H3C843	A0A0H3C843_CAUVN			Alanine racemase	0.000348797	21	17	17	18	18	17	17							25.3083	25.3194	25.428	25.4312	25.3772	25.4643	25.3083	25.3194	25.428	25.4312	25.3772	25.4643	25.3529	25.4247	0.00260773	0.00173102	0.0717548	0.262431	0.580984	0.398296	0.399794
A0A0H3C844	A0A0H3C844_CAUVN			Beta-lactamase family protein	0.000348797	15	13	14	14	14	15	13							28.2665	28.3313	28.1254	28.2785	28.0612	28.1305	28.2665	28.3313	28.1254	28.2785	28.0612	28.1305	28.2436	28.1596	0.00372706	0.00394092	-0.0839828	0.372571	0.428791	0.505405	0.29636
A0A0H3C846	A0A0H3C846_CAUVN			ATP-dependent protease subunit	0.000348797	11	11	10	10	10	10	10							25.5784	25.5468	25.6314	25.6373	25.501	25.5274	25.5784	25.5468	25.6314	25.6373	25.501	25.5274	25.586	25.5565	0.00167122	0.00283014	-0.0294958	0.630326	0.200435	0.729026	0.137257
A0A0H3C847	A0A0H3C847_CAUVN			Electron transport complex I subunit, NADH-ubiquinone oxidoreductase	0.000348797	8	8	7	8	8	7	8							27.8433	27.6374	27.7766	27.7428	27.9173	27.8631	27.8433	27.6374	27.7766	27.7428	27.9173	27.8631	27.755	27.8429	0.0037861	0.00320645	0.0879344	0.316528	0.499587	0.451906	0.344952
A0A0H3C848	A0A0H3C848_CAUVN			TonB-dependent outer membrane receptor	0.000348797	79	79	78	79	78	78	77							31.692	31.6984	31.7031	31.2041	31.1693	31.2748	31.692	31.6984	31.7031	31.2041	31.1693	31.2748	31.6978	31.2167	0.000176714	0.00172339	-0.48111	0.000129704	3.88705	0.00387957	2.41122
A0A0H3C849	A0A0H3C849_CAUVN			Antitoxin protein parD1	0.0010142	1	1	1	1	1	1	1							21.6594	21.6205	21.8478	21.8143	21.9663	21.6429	21.6594	21.6205	21.8478	21.8143	21.9663	21.6429	21.7127	21.8139	0.00559995	0.00741888	0.101179	0.403116	0.39457	0.531275	0.274681
A0A0H3C850	A0A0H3C850_CAUVN			Chromosome segregation and condensation protein B scpB	0.000348797	7	7	5	6	6	6	5							22.477	21.9438	22.2285	22.5618	21.8564	22.3014	22.477	21.9438	22.2285	22.5618	21.8564	22.3014	22.2328	22.2685	0.0120091	0.0160397	0.0357447	0.92066	0.0359007	0.94893	0.0227658
A0A0H3C851	A0A0H3C851_CAUVN			Uncharacterized protein	0.000348797	20	20	20	18	16	17	19							25.9261	25.7275	25.768	25.9726	25.8414	25.9525	25.9261	25.7275	25.768	25.9726	25.8414	25.9525	25.8098	25.9233	0.00406814	0.00272627	0.113542	0.184512	0.733974	0.31036	0.508134
A0A0H3C853	A0A0H3C853_CAUVN			Malonyl CoA-acyl carrier protein transacylase	0.000348797	32	32	31	31	31	32	30							28.9558	28.8675	28.9381	29.281	29.1739	29.234	28.9558	28.8675	28.9381	29.281	29.1739	29.234	28.921	29.2303	0.00161444	0.00183662	0.309268	0.00190381	2.72038	0.0162011	1.79045
A0A0H3C855	A0A0H3C855_CAUVN			Chaperone protein ClpB	0.000348797	66	65	66	66	60	66	64							28.5157	29.7837	29.8263	30.0828	29.9739	30.0925	28.5157	29.7837	29.8263	30.0828	29.9739	30.0925	29.4887	30.0507	0.0253516	0.0021908	0.562034	0.12519	0.902431	0.239821	0.620112
A0A0H3C856	A0A0H3C856_CAUVN			Exodeoxyribonuclease III	0.000348797	20	20	19	19	18	18	18							27.0637	27.1211	27.0276	27.0765	27.0548	26.9475	27.0637	27.1211	27.0276	27.0765	27.0548	26.9475	27.0713	27.0274	0.00174315	0.00255578	-0.0439499	0.484008	0.315147	0.605712	0.217734
A0A0H3C858	A0A0H3C858_CAUVN			YicC-family protein	0.000348797	26	25	23	24	21	21	24							26.2753	26.2442	26.3995	26.4021	26.22	26.2865	26.2753	26.2442	26.3995	26.4021	26.22	26.2865	26.3079	26.3048	0.0031232	0.00350425	-0.00304607	0.964727	0.0155957	0.974729	0.0111162
A0A0H3C860	A0A0H3C860_CAUVN			FlaG superfamily protein	0.000348797	9	9	9	9	8	8	7							25.7961	26.0562	25.7699	25.2695	25.1987	24.7375	25.7961	26.0562	25.7699	25.2695	25.1987	24.7375	25.88	25.0871	0.00611725	0.0115239	-0.79284	0.00397662	2.40049	0.0250279	1.60158
A0A0H3C861	A0A0H3C861_CAUVN			Polyferredoxin protein fixG	0.000348797	3	3	3	3	1	2	2							21.4446	21.888	21.1456	18.9066	20.4019	19.7836	21.4446	21.888	21.1456	18.9066	20.4019	19.7836	21.5253	19.8213	0.01738	0.0381465	-1.70393	0.00636966	2.19588	0.0339978	1.46855
A0A0H3C862	A0A0H3C862_CAUVN			Ribosomal RNA small subunit methyltransferase A	0.000348797	17	16	16	16	16	17	16							26.8705	26.7688	26.8472	26.9966	26.999	26.9417	26.8705	26.7688	26.8472	26.9966	26.999	26.9417	26.8295	26.9794	0.00198561	0.00120095	0.14988	0.0320326	1.49441	0.0972568	1.01208
A0A0H3C863	A0A0H3C863_CAUVN			6,7-dimethyl-8-ribityllumazine synthase	0.000348797	10	9	10	9	9	8	8							29.8892	29.9329	29.7157	30.1619	30.1103	29.832	29.8892	29.9329	29.7157	30.1619	30.1103	29.832	29.8489	30.0418	0.00384847	0.00590861	0.192865	0.150718	0.821833	0.270863	0.56725
A0A0H3C864	A0A0H3C864_CAUVN			NAD/NADH-dependent eicosanoid dehydrogenase	0.000348797	12	12	11	11	10	9	10							26.4304	26.4757	26.3611	26.4117	26.1939	26.3104	26.4304	26.4757	26.3611	26.4117	26.1939	26.3104	26.4232	26.3081	0.00218357	0.00414387	-0.11512	0.17146	0.765836	0.29599	0.528723
A0A0H3C865	A0A0H3C865_CAUVN			Uncharacterized protein	0.000348797	10	9	10	10	10	10	9							27.5883	27.6066	27.546	27.5622	27.4374	27.478	27.5883	27.6066	27.546	27.5622	27.4374	27.478	27.5805	27.4935	0.00112752	0.00231606	-0.0870397	0.167241	0.776656	0.290867	0.536305
A0A0H3C866	A0A0H3C866_CAUVN			CRP-family transcription regulator FtrB	0.000348797	5	5	5	3	2	1	4							22.8744	22.8227	20.8749	20.4994	18.5394	21.7097	22.8744	22.8227	20.8749	20.4994	18.5394	21.7097	22.4367	20.7507	0.0513622	0.0790076	-1.68598	0.0980259	1.00866	0.202316	0.693969
A0A0H3C867	A0A0H3C867_CAUVN			Lipopolysaccharide export system permease protein LptF	0.000348797	6	6	6	6	6	6	6							24.4052	24.4931	24.6116	24.8839	24.6366	24.7641	24.4052	24.4931	24.6116	24.8839	24.6366	24.7641	24.5058	24.7651	0.00422708	0.00499457	0.25928	0.0323323	1.49036	0.0979174	1.00914
A0A0H3C868	A0A0H3C868_CAUVN			Glyoxalase family protein	0.000348797	3	3	3	3	3	3	3							23.6023	23.6126	23.8078	24.0002	23.8052	23.7965	23.6023	23.6126	23.8078	24.0002	23.8052	23.7965	23.6774	23.8704	0.00489009	0.00482695	0.193059	0.0836297	1.07764	0.182811	0.737997
A0A0H3C869	A0A0H3C869_CAUVN			Acetyltransferase	0.000348797	10	6	6	6	6	7	7							24.8294	24.6553	24.5088	24.6894	24.797	24.8377	24.8294	24.6553	24.5088	24.6894	24.797	24.8377	24.6705	24.776	0.00650683	0.00309341	0.105552	0.306921	0.512973	0.442371	0.354213
A0A0H3C870	A0A0H3C870_CAUVN			Cyclase homology domain protein	0.000348797	15	10	10	10	10	10	12							23.1293	22.9323	23.222	23.3237	23.0176	23.3051	23.1293	22.9323	23.222	23.3237	23.0176	23.3051	23.0996	23.2221	0.00640563	0.00739261	0.122551	0.356107	0.448419	0.487891	0.311677
A0A0H3C871	A0A0H3C871_CAUVN			Pirin family protein	0.000348797	15	14	13	12	15	14	14							25.1097	25.0907	25.0892	25.5547	25.5325	25.3162	25.1097	25.0907	25.0892	25.5547	25.5325	25.3162	25.0966	25.4717	0.000455118	0.00517498	0.37514	0.0040681	2.39061	0.025392	1.5953
A0A0H3C872	A0A0H3C872_CAUVN			Cytochrome C family protein	0.000348797	2	2	2	2	1	0	0							20.5186	20.9168	20.42	15.7117	NA	NA	20.5186	20.9168	20.42	15.7117	20.3116	19.5005	20.6349	19.4148	0.012756	0.132664	-1.22012	0.140244	0.853116	0.25735	0.589476
A0A0H3C873	A0A0H3C873_CAUVN			Flagellin	0.000348797	5	4	3	3	4	3	3							21.3144	20.5262	20.9267	21.0084	20.5156	20.7843	21.3144	20.5262	20.9267	21.0084	20.5156	20.7843	20.958	20.7834	0.0188359	0.0118805	-0.174673	0.539853	0.267724	0.652359	0.185513
A0A0H3C874	A0A0H3C874_CAUVN			TonB-dependent outer membrane receptor	0.000348797	31	28	26	31	27	29	29							25.8661	25.7332	25.7986	25.9366	25.8461	25.9838	25.8661	25.7332	25.7986	25.9366	25.8461	25.9838	25.8003	25.9233	0.00257563	0.00269994	0.122981	0.107891	0.967013	0.216715	0.66411
A0A0H3C875	A0A0H3C875_CAUVN			GntR-family transcriptional regulator	0.000348797	7	5	6	7	6	5	7							23.0744	23.5782	23.8714	23.777	23.244	23.6236	23.0744	23.5782	23.8714	23.777	23.244	23.6236	23.5444	23.5651	0.0171483	0.0116514	0.0207323	0.875499	0.0577444	0.913714	0.0391897
A0A0H3C877	A0A0H3C877_CAUVN			Aspartate racemase	0.000348797	7	7	6	5	5	6	6							23.7629	23.7975	23.6174	23.8615	23.7697	23.8126	23.7629	23.7975	23.6174	23.8615	23.7697	23.8126	23.728	23.8151	0.00402779	0.00192884	0.0871217	0.241481	0.617116	0.374879	0.426109
A0A0H3C878	A0A0H3C878_CAUVN			Flagellar hook protein FlgE	0.000348797	19	19	19	19	18	18	18							26.2082	26.1487	26.3288	25.8598	25.8157	25.9274	26.2082	26.1487	26.3288	25.8598	25.8157	25.9274	26.2305	25.8684	0.00349833	0.00217411	-0.362129	0.00247846	2.60582	0.0186251	1.7299
A0A0H3C879	A0A0H3C879_CAUVN			3-mercaptopyruvate sulfurtransferase	0.000348797	22	20	21	21	20	22	19							27.705	27.7975	27.7586	27.7018	27.391	27.4072	27.705	27.7975	27.7586	27.7018	27.391	27.4072	27.7542	27.5073	0.00167442	0.00636186	-0.246956	0.0469461	1.3284	0.124735	0.904011
A0A0H3C881	A0A0H3C881_CAUVN			ATP-dependent helicase, dinG family	0.000348797	13	11	12	13	13	11	13							24.1972	24.3457	24.3982	24.7425	24.7209	24.5838	24.1972	24.3457	24.3982	24.7425	24.7209	24.5838	24.3162	24.6841	0.00428836	0.00348768	0.367915	0.00449786	2.34699	0.0269604	1.56927
A0A0H3C882	A0A0H3C882_CAUVN			3-hydroxy-3-methylglutaryl CoA synthase	0.000348797	3	2	3	2	1	1	1							19.5661	20.0436	19.7275	18.893	18.5882	18.7521	19.5661	20.0436	19.7275	18.893	18.5882	18.7521	19.7929	18.7498	0.0122808	0.00813918	-1.04314	0.000653415	3.18481	0.00953608	2.02063
A0A0H3C883	A0A0H3C883_CAUVN			Flagellar assembly protein FlbE/FliH	0.000348797	11	11	11	10	8	9	10							24.5652	24.2804	24.4627	24.6914	24.2769	24.8119	24.5652	24.2804	24.4627	24.6914	24.2769	24.8119	24.4409	24.611	0.00590407	0.0114107	0.170125	0.372383	0.429011	0.505377	0.296385
A0A0H3C884	A0A0H3C884_CAUVN			Chromosome replication regulator protein HdaA	0.000348797	14	13	10	10	9	11	10							24.1788	24.1665	23.9602	24.0731	24.1836	24.1991	24.1788	24.1665	23.9602	24.0731	24.1836	24.1991	24.1053	24.153	0.00509551	0.00284555	0.0477916	0.563664	0.24898	0.67519	0.170574
A0A0H3C885	A0A0H3C885_CAUVN			Conserved membrane spanning protein	0.000348797	6	5	4	4	4	4	5							23.2196	23.2316	23.191	23.1332	23.2362	23.5626	23.2196	23.2316	23.191	23.1332	23.2362	23.5626	23.2142	23.3225	0.000899836	0.00961734	0.108335	0.452019	0.344843	0.574485	0.240721
A0A0H3C887	A0A0H3C887_CAUVN			DUF2236 domain-containing protein	0.000348797	4	4	3	4	4	3	2							21.2367	21.0402	21.1838	20.8682	20.3805	20.4761	21.2367	21.0402	21.1838	20.8682	20.3805	20.4761	21.1559	20.5908	0.0048056	0.012562	-0.565138	0.00849925	2.07062	0.0413307	1.38373
A0A0H3C889	A0A0H3C889_CAUVN			Acyl-CoA dehydrogenase, short-chain specific	0.000348797	9	9	9	9	6	8	5							23.5817	23.7503	23.5338	22.8638	22.9534	22.7958	23.5817	23.7503	23.5338	22.8638	22.9534	22.7958	23.6249	22.8725	0.0048139	0.00345423	-0.75249	0.000151465	3.81969	0.00439977	2.35657
A0A0H3C890	A0A0H3C890_CAUVN			Cystine-binding protein	0.000348797	17	16	15	15	14	14	14							25.981	25.9479	26.0799	25.738	25.8451	25.7844	25.981	25.9479	26.0799	25.738	25.8451	25.7844	26.0041	25.7898	0.00264172	0.00208288	-0.214244	0.014526	1.83786	0.0583344	1.23408
A0A0H3C893	A0A0H3C893_CAUVN			Acetyltransferase component of pyruvate dehydrogenase complex	0.000348797	40	40	37	38	38	39	38							30.5268	30.4266	30.5662	30.785	30.5534	30.6264	30.5268	30.4266	30.5662	30.785	30.5534	30.6264	30.5077	30.6582	0.00235847	0.00386134	0.150469	0.120426	0.91928	0.233524	0.631669
A0A0H3C895	A0A0H3C895_CAUVN			Long-chain-fatty-acid--CoA ligase	0.000348797	46	46	45	43	39	41	43							28.1947	28.1968	28.1099	27.5956	27.5268	27.6816	28.1947	28.1968	28.1099	27.5956	27.5268	27.6816	28.1677	27.6027	0.00175973	0.0028109	-0.565002	0.000172273	3.76378	0.00459206	2.33799
A0A0H3C896	A0A0H3C896_CAUVN			DEAD-box RNA helicase-like protein	0.000348797	49	47	45	48	45	48	46							27.4528	27.3775	27.3941	27.7942	27.6629	27.7796	27.4528	27.3775	27.3941	27.7942	27.6629	27.7796	27.4085	27.7467	0.00144348	0.00259436	0.338249	0.0016978	2.77011	0.0152434	1.81692
A0A0H3C897	A0A0H3C897_CAUVN			Lysophospholipase L2	0.000348797	10	8	6	10	7	8	9							24.0307	23.3607	23.6076	23.8025	23.3162	23.937	24.0307	23.3607	23.6076	23.8025	23.3162	23.937	23.6933	23.7089	0.0143188	0.0137874	0.0156246	0.939304	0.0271939	0.958519	0.0183991
A0A0H3C898	A0A0H3C898_CAUVN			Universal stress protein family	0.000348797	17	17	17	16	14	17	16							26.6875	26.7802	26.3063	25.9798	26.0346	26.0656	26.6875	26.7802	26.3063	25.9798	26.0346	26.0656	26.6055	26.0271	0.0094444	0.00166778	-0.578379	0.00675584	2.17032	0.0353104	1.4521
A0A0H3C899	A0A0H3C899_CAUVN			Polar localization protein TipN	0.000348797	62	62	59	55	58	58	61							28.4427	28.4553	28.3467	28.6002	28.5264	28.6334	28.4427	28.4553	28.3467	28.6002	28.5264	28.6334	28.4157	28.5874	0.00209042	0.00191611	0.171662	0.028968	1.53808	0.091349	1.0393
A0A0H3C8A0	A0A0H3C8A0_CAUVN			FlbA protein	0.000348797	19	19	18	19	18	18	18							26.7592	26.7069	26.7208	26.3338	26.3111	26.5207	26.7592	26.7069	26.7208	26.3338	26.3111	26.5207	26.7291	26.3916	0.00101366	0.00436016	-0.337504	0.00425727	2.37087	0.0261407	1.58268
A0A0H3C8A1	A0A0H3C8A1_CAUVN			Nitrogen assimilation regulatory protein NtrC	0.000348797	33	31	32	33	32	31	31							27.2276	27.292	27.6551	27.5279	27.5204	27.5013	27.2276	27.292	27.6551	27.5279	27.5204	27.5013	27.4042	27.5166	0.00841411	0.000498961	0.1124	0.348844	0.457369	0.482427	0.316568
A0A0H3C8A2	A0A0H3C8A2_CAUVN			2-deoxy-D-gluconate 3-dehydrogenase	0.000348797	14	14	13	13	13	13	13							26.1372	26.1637	26.0829	26.5664	26.5695	26.4932	26.1372	26.1637	26.0829	26.5664	26.5695	26.4932	26.1283	26.5434	0.00157677	0.00162793	0.415109	0.000325084	3.488	0.00632886	2.19867
A0A0H3C8A3	A0A0H3C8A3_CAUVN			Nucleoside triphosphate pyrophosphohydrolase	0.000348797	7	7	7	7	7	7	6							24.3456	24.2072	24.1692	24.0194	24.1241	24.1749	24.3456	24.2072	24.1692	24.0194	24.1241	24.1749	24.2427	24.1076	0.00382981	0.00328911	-0.135066	0.123501	0.908329	0.237599	0.624155
A0A0H3C8A4	A0A0H3C8A4_CAUVN			Flagellin	0.000348797	13	13	12	12	12	10	12							25.8066	25.6276	25.469	25.4247	24.9441	26.0498	25.8066	25.6276	25.469	25.4247	24.9441	26.0498	25.641	25.5442	0.00658918	0.0217653	-0.0968203	0.599713	0.222057	0.705229	0.15167
A0A0H3C8A5	A0A0H3C8A5_CAUVN			DUF1244 domain-containing protein	0.000348797	10	10	10	8	9	8	9							24.9639	25.1272	24.8642	25.2084	25.1462	24.9496	24.9639	25.1272	24.8642	25.2084	25.1462	24.9496	24.9892	25.1056	0.005315	0.00538187	0.116389	0.305757	0.514624	0.441012	0.35555
A0A0H3C8A6	A0A0H3C8A6_CAUVN	A0A0H3C8A6;A0A0H3CBF6	cobQ	Cobyric acid synthase	0.000348797	28	28	26	26	24	25	24	18	17	17	16	17	16	27.1183	27.1628	27.0761	27.2003	27.1619	27.1594	27.1183	27.1628	27.0761	27.2003	27.1619	27.1594	27.1195	27.174	0.00159699	0.000842031	0.0544902	0.30943	0.509437	0.444926	0.351712
A0A0H3C8A7	A0A0H3C8A7_CAUVN			Single-stranded DNA-binding protein	0.000348797	25	22	22	21	21	22	22							29.1829	29.0851	29.1692	29.5956	29.5453	29.6134	29.1829	29.0851	29.1692	29.5956	29.5453	29.6134	29.1464	29.5851	0.00181681	0.00119376	0.438655	0.000273088	3.5637	0.00597826	2.22343
A0A0H3C8A8	A0A0H3C8A8_CAUVN			Arsenate reductase	0.000348797	8	8	7	5	5	7	8							23.9425	23.6801	23.6385	22.9908	23.908	23.9929	23.9425	23.6801	23.6385	22.9908	23.908	23.9929	23.7601	23.696	0.00693841	0.0235131	-0.0640546	0.687363	0.162814	0.773567	0.111502
A0A0H3C8A9	A0A0H3C8A9_CAUVN			Beta-glucosidase	0.000348797	34	34	32	30	27	28	29							26.6589	26.452	26.0715	25.8776	26.0773	25.5805	26.6589	26.452	26.0715	25.8776	26.0773	25.5805	26.4142	25.8594	0.0112882	0.0096737	-0.554809	0.0352932	1.45231	0.103151	0.986528
A0A0H3C8B0	A0A0H3C8B0_CAUVN			LysR-family transcriptional regulator	0.000348797	6	5	6	6	6	5	6							22.543	22.7269	22.6996	22.6254	22.2854	22.6654	22.543	22.7269	22.6996	22.6254	22.2854	22.6654	22.6588	22.5352	0.00438111	0.00926947	-0.123592	0.328013	0.484109	0.461971	0.335385
A0A0H3C8B2	A0A0H3C8B2_CAUVN			6-phosphogluconolactonase	0.000348797	24	24	24	24	23	24	24							29.1136	29.0401	29.0712	29.4934	29.3947	29.4473	29.1136	29.0401	29.0712	29.4934	29.3947	29.4473	29.0753	29.4457	0.00126822	0.00167696	0.370412	0.000609685	3.21489	0.00907319	2.04224
A0A0H3C8B3	A0A0H3C8B3_CAUVN			Major facilitator superfamily transporter	0.000348797	3	3	3	1	1	2	2							20.5195	21.5351	20.1657	18.7326	21.2593	20.9085	20.5195	21.5351	20.1657	18.7326	21.2593	20.9085	20.8622	20.6435	0.0342749	0.0674279	-0.218671	0.588024	0.230605	0.695544	0.157675
A0A0H3C8B4	A0A0H3C8B4_CAUVN			Protease 4	0.000348797	33	32	31	31	31	32	33							28.2977	28.2762	28.2834	28.3944	28.5476	28.5239	28.2977	28.2762	28.2834	28.3944	28.5476	28.5239	28.2858	28.4902	0.000386348	0.0028936	0.204398	0.0162935	1.78798	0.0636776	1.19601
A0A0H3C8B5	A0A0H3C8B5_CAUVN			DNA integration/recombination/inversion protein	0.0010142	2	2	2	2	1	2	1							22.8748	22.7042	22.8173	22.6812	22.9644	22.5095	22.8748	22.7042	22.8173	22.6812	22.9644	22.5095	22.8005	22.7307	0.00380681	0.0101112	-0.0698666	0.557333	0.253885	0.669198	0.174445
A0A0H3C8B6	A0A0H3C8B6_CAUVN			Flagellar basal-body rod protein FlgF	0.00069541	2	1	2	0	0	1	0							24.6096	24.6924	NA	NA	20.4883	NA	24.6096	24.6924	18.2377	19.8187	20.4883	19.1276	24.0751	19.9163	0.164477	0.0343425	-4.15877	0.202322	0.693956	0.331123	0.480011
A0A0H3C8B7	A0A0H3C8B7_CAUVN			Uncharacterized protein	0.000348797	7	7	7	7	7	7	7							25.2546	25.125	25.1156	25.3081	25.1881	25.2316	25.2546	25.125	25.1156	25.3081	25.1881	25.2316	25.1665	25.2435	0.00308721	0.00240702	0.0770024	0.280277	0.552413	0.414925	0.382031
A0A0H3C8B9	A0A0H3C8B9_CAUVN			Cytochrome bo(3) ubiquinol oxidase subunit 3	0.000348797	2	2	2	2	2	2	2							25.7437	26.0339	25.871	25.9062	25.8472	25.9269	25.7437	26.0339	25.871	25.9062	25.8472	25.9269	25.8877	25.8938	0.00561996	0.00159672	0.00608306	0.906449	0.0426569	0.936839	0.028335
A0A0H3C8C0	A0A0H3C8C0_CAUVN			ABC transporter, ATP-binding protein	0.000348797	36	36	35	36	33	36	35							29.8746	29.8254	29.7605	29.9077	30.0404	29.9918	29.8746	29.8254	29.7605	29.9077	30.0404	29.9918	29.8209	29.981	0.00192051	0.00224031	0.160079	0.0432605	1.36391	0.117421	0.930253
A0A0H3C8C2	A0A0H3C8C2_CAUVN			General stress protein 17O	0.000348797	8	8	8	7	5	8	7							22.46	22.4891	22.2594	21.8786	22.357	21.2735	22.46	22.4891	22.2594	21.8786	22.357	21.2735	22.4064	21.9028	0.00558169	0.0248679	-0.503599	0.0935636	1.02889	0.196289	0.707105
A0A0H3C8C4	A0A0H3C8C4_CAUVN			GntR-family transcriptional regulator	0.000348797	17	17	17	17	17	17	17							27.9952	27.9761	27.8439	28.2504	28.0578	28.1401	27.9952	27.9761	27.8439	28.2504	28.0578	28.1401	27.94	28.1516	0.00295033	0.0034338	0.211654	0.0354386	1.45052	0.10344	0.985313
A0A0H3C8C5	A0A0H3C8C5_CAUVN			GCN5-related N-acetyltransferase	0.000348797	5	4	5	5	5	3	3							22.5221	22.7973	22.548	22.5266	21.7786	21.9214	22.5221	22.7973	22.548	22.5266	21.7786	21.9214	22.6279	22.1134	0.00671741	0.0179895	-0.514532	0.0476232	1.32218	0.126091	0.899316
A0A0H3C8C6	A0A0H3C8C6_CAUVN			RHH DNA-binding protein	0.000348797	4	4	4	3	3	4	3							22.5767	22.6096	22.3736	22.1304	22.3242	22.5555	22.5767	22.6096	22.3736	22.1304	22.3242	22.5555	22.5237	22.3472	0.00567687	0.00952802	-0.17649	0.213203	0.671207	0.342964	0.464752
A0A0H3C8C7	A0A0H3C8C7_CAUVN			Nodulation protein N	0.000348797	4	4	4	4	4	4	4							25.4163	25.4545	25.3598	25.5984	25.3041	25.3098	25.4163	25.4545	25.3598	25.5984	25.3041	25.3098	25.4107	25.4108	0.00187491	0.00662364	9.522e-05	0.952114	0.0213109	0.967161	0.0145012
A0A0H3C8C8	A0A0H3C8C8_CAUVN			TonB-dependent receptor	0.000348797	82	80	79	78	82	77	80							32.0102	32.0093	31.9987	32.5162	32.3822	32.3688	32.0102	32.0093	31.9987	32.5162	32.3822	32.3688	32.0061	32.424	0.000198402	0.00251432	0.417897	0.000602144	3.2203	0.00900533	2.0455
A0A0H3C8D0	A0A0H3C8D0_CAUVN			Glutathione S-transferase	0.000348797	3	3	3	3	3	3	3							22.0151	21.9096	22.0019	21.4772	21.5601	21.6983	22.0151	21.9096	22.0019	21.4772	21.5601	21.6983	21.9763	21.5814	0.00261421	0.00517495	-0.394868	0.0025314	2.59664	0.0187896	1.72608
A0A0H3C8D1	A0A0H3C8D1_CAUVN			Enoyl-CoA hydratase	0.000348797	15	15	15	14	14	15	15							25.5453	25.4947	25.3243	25.1207	25.3517	25.1825	25.5453	25.4947	25.3243	25.1207	25.3517	25.1825	25.4578	25.2216	0.00454761	0.00474415	-0.236205	0.0473882	1.32433	0.125689	0.900703
A0A0H3C8D2	A0A0H3C8D2_CAUVN			TetR-family transcriptional regulator	0.000348797	5	5	5	5	5	5	5							24.2546	24.1643	24.3351	24.5815	24.7183	24.5816	24.2546	24.1643	24.3351	24.5815	24.7183	24.5816	24.253	24.6286	0.00352304	0.00320652	0.375567	0.00258045	2.5883	0.01906	1.71988
A0A0H3C8D3	A0A0H3C8D3_CAUVN			Lysophospholipase	0.000348797	3	3	3	3	2	3	3							21.9894	21.7252	21.7463	20.7073	21.2526	21.7564	21.9894	21.7252	21.7463	20.7073	21.2526	21.7564	21.8254	21.3014	0.00672858	0.0247058	-0.523977	0.0819376	1.08652	0.180787	0.742834
A0A0H3C8D5	A0A0H3C8D5_CAUVN			TVP38/TMEM64 family membrane protein	0.000348797	4	4	4	3	2	3	2							21.5751	22.3755	21.6125	20.3377	21.8387	20.88	21.5751	22.3755	21.6125	20.3377	21.8387	20.88	21.9039	21.1551	0.0206694	0.0361611	-0.748777	0.111122	0.954202	0.221437	0.65475
A0A0H3C8D6	A0A0H3C8D6_CAUVN			Ribokinase	0.000348797	16	16	16	14	16	15	15							26.4216	26.4219	26.4329	26.6918	26.4549	26.4939	26.4216	26.4219	26.4329	26.6918	26.4549	26.4939	26.4255	26.5507	0.000244264	0.00478346	0.125178	0.16597	0.77997	0.28949	0.538366
A0A0H3C8D7	A0A0H3C8D7_CAUVN			NagC-family transcriptional regulator	0.000348797	10	10	9	10	9	9	9							24.0247	23.9344	24.0565	23.7528	23.9123	23.7271	24.0247	23.9344	24.0565	23.7528	23.9123	23.7271	24.0061	23.7998	0.00263955	0.004215	-0.206347	0.0318703	1.49661	0.0969451	1.01347
A0A0H3C8D8	A0A0H3C8D8_CAUVN			Nucleoside permease nupC	0.000348797	7	6	6	6	7	6	7							24.7614	24.4315	24.7276	24.4232	24.5872	24.7735	24.7614	24.4315	24.7276	24.4232	24.5872	24.7735	24.6476	24.6017	0.00736542	0.00712609	-0.045863	0.742836	0.129107	0.812071	0.0904058
A0A0H3C8D9	A0A0H3C8D9_CAUVN			Undecaprenyl-phosphate beta-N-acetyl-D-fucosaminephosphotransferase	0.000348797	2	2	2	2	2	2	2							21.9184	21.7589	21.8843	22.127	22.1793	22.2981	21.9184	21.7589	21.8843	22.127	22.1793	22.2981	21.8555	22.2033	0.00384424	0.00395055	0.347781	0.00420138	2.37661	0.02585	1.58754
A0A0H3C8E2	A0A0H3C8E2_CAUVN			Phosphoenolpyruvate carboxylase	0.000348797	93	92	93	91	92	92	93							30.5695	30.5985	30.6246	30.9228	30.8043	30.951	30.5695	30.5985	30.6246	30.9228	30.8043	30.951	30.5977	30.8941	0.000901372	0.00251995	0.296349	0.00321937	2.49223	0.022088	1.65584
A0A0H3C8E4	A0A0H3C8E4_CAUVN			Acyl-CoA thioesterase II	0.000348797	7	6	5	6	5	5	6							23.6424	23.7188	23.6667	23.5141	23.1387	22.8508	23.6424	23.7188	23.6667	23.5141	23.1387	22.8508	23.6763	23.1936	0.0016492	0.0143551	-0.482779	0.0281023	1.55126	0.0895539	1.04792
A0A0H3C8E5	A0A0H3C8E5_CAUVN			NYN domain protein	0.000348797	13	13	10	13	12	12	11							26.3906	26.309	26.5524	26.4344	26.5187	26.432	26.3906	26.309	26.5524	26.4344	26.5187	26.432	26.4209	26.4623	0.00468919	0.00186621	0.0413407	0.594576	0.225793	0.700551	0.15456
A0A0H3C8E6	A0A0H3C8E6_CAUVN			Proline iminopeptidase	0.000348797	17	15	16	15	16	15	15							26.4073	26.3595	26.4695	26.7233	26.4819	26.5713	26.4073	26.3595	26.4695	26.7233	26.4819	26.5713	26.4128	26.5956	0.00208835	0.00459083	0.182873	0.0666328	1.17631	0.156408	0.80574
A0A0H3C8E7	A0A0H3C8E7_CAUVN			Cys-tRNA(Pro)/Cys-tRNA(Cys) deacylase	0.000348797	6	6	5	5	5	5	6							23.9063	23.998	24.0735	24.2419	23.9311	24.208	23.9063	23.998	24.0735	24.2419	23.9311	24.208	23.9942	24.1336	0.00348939	0.00706804	0.139339	0.245162	0.610547	0.379229	0.421098
A0A0H3C8E9	A0A0H3C8E9_CAUVN			Phosphatase/phosphohexomutase family protein	0.000348797	9	8	9	8	9	9	8							24.7484	24.5638	24.4845	24.8759	24.7709	24.8422	24.7484	24.5638	24.4845	24.8759	24.7709	24.8422	24.6032	24.8303	0.00550473	0.00216063	0.227169	0.036478	1.43797	0.105052	0.978594
A0A0H3C8F0	A0A0H3C8F0_CAUVN			Uncharacterized protein	0.000348797	7	7	5	6	7	7	7							22.867	22.6952	22.5852	22.8944	21.7086	22.566	22.867	22.6952	22.5852	22.8944	21.7086	22.566	22.7205	22.4704	0.00625299	0.027345	-0.250104	0.342943	0.464778	0.476117	0.322286
A0A0H3C8F1	A0A0H3C8F1_CAUVN			Beta-glucosidase	0.000348797	22	22	21	22	19	19	19							25.7175	25.579	25.7661	25.0538	25.0047	25.1784	25.7175	25.579	25.7661	25.0538	25.0047	25.1784	25.6897	25.0808	0.00377844	0.00356925	-0.608863	0.000372932	3.42837	0.00659875	2.18054
A0A0H3C8F2	A0A0H3C8F2_CAUVN			Adapter for ClpXP proteolysis of tmRNA-tagged proteins SspB	0.000348797	10	9	9	10	9	9	8							27.1849	27.1718	27.1863	26.989	26.81	27.0213	27.1849	27.1718	27.1863	26.989	26.81	27.0213	27.181	26.9431	0.000293062	0.00422511	-0.237956	0.0166981	1.77733	0.064673	1.18928
A0A0H3C8F4	A0A0H3C8F4_CAUVN			IclR family HTH transcriptional regulator	0.000348797	4	4	4	4	4	4	4							22.4372	22.3141	22.0311	22.3549	22.2724	22.6465	22.4372	22.3141	22.0311	22.3549	22.2724	22.6465	22.2706	22.4337	0.00935548	0.00876679	0.163078	0.314861	0.50188	0.449951	0.346835
A0A0H3C8F5	A0A0H3C8F5_CAUVN			DNA topoisomerase 4 subunit A	0.000348797	59	50	50	49	48	49	50							27.8987	27.744	27.9242	27.9699	27.9506	27.9817	27.8987	27.744	27.9242	27.9699	27.9506	27.9817	27.8578	27.9675	0.00350044	0.00056196	0.109651	0.14019	0.853283	0.25735	0.589476
A0A0H3C8F6	A0A0H3C8F6_CAUVN			2-keto-4-pentenoate hydratase family protein	0.0010142	1	1	1	1	1	1	1							18.8022	19.0021	19.1241	18.9357	18.9313	18.3406	18.8022	19.0021	19.1241	18.9357	18.9313	18.3406	18.9822	18.7616	0.00856288	0.0182708	-0.220559	0.26263	0.580655	0.398296	0.399794
A0A0H3C8F8	A0A0H3C8F8_CAUVN			Endodeoxyribonuclease RusA	0.00722022	1	1	1	0	1	1	1							17.3124	18.5079	NA	16.5537	18.1613	17.7659	17.3124	18.5079	19.888	16.5537	18.1613	17.7659	18.9371	17.6388	0.06941	0.0478865	-1.29833	0.212615	0.672407	0.342555	0.465269
A0A0H3C8F9	A0A0H3C8F9_CAUVN			Uncharacterized protein	0.000348797	10	9	10	9	6	6	5							24.3422	24.5852	24.4037	24.0517	23.8019	23.855	24.3422	24.5852	24.4037	24.0517	23.8019	23.855	24.4474	23.9069	0.00516771	0.00550553	-0.54052	0.0022261	2.65245	0.0177912	1.7498
A0A0H3C8G0	A0A0H3C8G0_CAUVN			Gluconate 5-dehydrogenase	0.000348797	14	13	14	14	12	14	12							24.9196	24.8927	25.0548	24.7962	24.9073	24.593	24.9196	24.8927	25.0548	24.7962	24.9073	24.593	24.9574	24.7713	0.0034805	0.00643687	-0.186144	0.10917	0.961896	0.218557	0.660434
A0A0H3C8G2	A0A0H3C8G2_CAUVN			Mg-dependent Dnase TatD	0.000348797	11	11	11	11	9	10	10							24.7858	24.6856	24.7761	24.8066	24.7504	24.9429	24.7858	24.6856	24.7761	24.8066	24.7504	24.9429	24.7499	24.8356	0.00223438	0.0039868	0.0857277	0.281394	0.550685	0.416099	0.380803
A0A0H3C8G3	A0A0H3C8G3_CAUVN			Uncharacterized protein	0.000348797	3	1	0	1	1	1	1							19.7079	NA	19.4849	20.4004	19.6708	20.182	19.7079	18.7965	19.4849	20.4004	19.6708	20.182	19.379	20.1156	0.024579	0.0186445	0.736653	0.050892	1.29335	0.131518	0.881014
A0A0H3C8G4	A0A0H3C8G4_CAUVN			Alpha-L-rhamnosidase	0.000348797	28	27	27	26	26	25	24							25.7872	25.794	25.6462	25.6064	25.7882	25.6862	25.7872	25.794	25.6462	25.6064	25.7882	25.6862	25.7441	25.6955	0.00323986	0.00354582	-0.0485432	0.538211	0.269047	0.650635	0.186663
A0A0H3C8G5	A0A0H3C8G5_CAUVN			Superoxide dismutase [Cu-Zn]	0.000348797	10	10	10	10	10	10	10							27.695	27.6811	27.639	27.6752	27.4934	27.4788	27.695	27.6811	27.639	27.6752	27.4934	27.4788	27.6719	27.5519	0.00105248	0.00397182	-0.119941	0.137071	0.863055	0.253387	0.596216
A0A0H3C8G6	A0A0H3C8G6_CAUVN			Uncharacterized protein	0.000348797	39	38	38	38	38	39	39							29.0933	29.2054	29.1864	29.2887	29.4246	29.4707	29.0933	29.2054	29.1864	29.2887	29.4246	29.4707	29.1626	29.3967	0.00205767	0.00321974	0.234192	0.0181929	1.7401	0.0678547	1.16842
A0A0H3C8G7	A0A0H3C8G7_CAUVN			SCP domain protein	0.000348797	9	9	9	8	8	8	8							24.6982	24.4833	24.5359	24.5571	24.496	24.5369	24.6982	24.4833	24.5359	24.5571	24.496	24.5369	24.5754	24.5302	0.00455824	0.00126976	-0.0451627	0.576582	0.239139	0.686581	0.163308
A0A0H3C8G8	A0A0H3C8G8_CAUVN			Urea carboxylase-associated protein 2	0.000348797	8	1	0	4	2	0	2							19.1349	NA	20.928	19.3024	NA	21.3175	19.1349	20.5094	20.928	19.3024	20.0356	21.3175	20.3693	20.4625	0.0464592	0.0504441	0.093288	0.969231	0.0135725	0.977645	0.00981862
A0A0H3C8G9	A0A0H3C8G9_CAUVN			TonB-dependent outer membrane receptor	0.000348797	93	68	67	59	64	63	59							28.4926	28.4822	27.9968	28.5952	28.789	28.3127	28.4926	28.4822	27.9968	28.5952	28.789	28.3127	28.3416	28.5787	0.0100014	0.00838434	0.237105	0.251431	0.59958	0.385963	0.413455
A0A0H3C8H0	A0A0H3C8H0_CAUVN			Xaa-pro aminopeptidase	0.000348797	40	38	38	36	38	39	40							28.5415	28.5793	28.5351	28.8742	28.716	28.7999	28.5415	28.5793	28.5351	28.8742	28.716	28.7999	28.5521	28.7981	0.000836939	0.0027489	0.246001	0.00743902	2.12848	0.0378263	1.42221
A0A0H3C8H1	A0A0H3C8H1_CAUVN			Endonuclease/exonuclease/phosphatase family protein	0.000348797	12	10	12	11	11	10	9							23.8506	24.1734	24.362	24.2524	24.3241	24.1982	23.8506	24.1734	24.362	24.2524	24.3241	24.1982	24.1438	24.2592	0.0107193	0.00260271	0.115326	0.38897	0.410084	0.521402	0.282827
A0A0H3C8H2	A0A0H3C8H2_CAUVN			Thymidylate synthase	0.000348797	10	8	8	7	6	7	7							24.6426	24.5625	24.7863	24.7491	24.7043	24.8197	24.6426	24.5625	24.7863	24.7491	24.7043	24.8197	24.6668	24.7585	0.00459705	0.00234843	0.0917197	0.26739	0.572854	0.402906	0.394796
A0A0H3C8H5	A0A0H3C8H5_CAUVN			Histidine kinase	0.000348797	8	7	6	6	6	6	6							22.575	22.3376	22.666	22.9048	22.1152	22.2393	22.575	22.3376	22.666	22.9048	22.1152	22.2393	22.5327	22.4632	0.00752695	0.018937	-0.06953	0.661793	0.179278	0.753083	0.123157
A0A0H3C8H6	A0A0H3C8H6_CAUVN			Pyridine nucleotide-disulfide oxidoreductase	0.000348797	6	5	4	4	4	5	4							22.0242	21.5504	21.2985	20.8454	21.4919	20.4994	22.0242	21.5504	21.2985	20.8454	21.4919	20.4994	21.6563	21.0055	0.0170406	0.0240515	-0.650815	0.0770464	1.11325	0.17357	0.760525
A0A0H3C8H7	A0A0H3C8H7_CAUVN			Old yellow enzyme (OYE)-family NADH:flavin oxidoreductase	0.000348797	29	27	26	26	28	29	28							27.7761	27.7103	27.6707	28.067	28.1256	28.1715	27.7761	27.7103	27.6707	28.067	28.1256	28.1715	27.7197	28.122	0.00192016	0.00186144	0.402325	0.000581338	3.23557	0.00882524	2.05427
A0A0H3C8I0	A0A0H3C8I0_CAUVN			Aminotransferase	0.000348797	23	23	23	23	23	23	23							29.6872	29.7404	29.6872	30.2789	30.2007	30.1264	29.6872	29.7404	29.6872	30.2789	30.2007	30.1264	29.7051	30.2034	0.00103291	0.00252538	0.498216	0.000249393	3.60312	0.00569908	2.24419
A0A0H3C8I1	A0A0H3C8I1_CAUVN			Diguanylate receptor protein dgrA	0.000348797	12	12	11	12	11	12	12							25.5228	25.4342	25.2762	25.6069	25.5562	25.7137	25.5228	25.4342	25.2762	25.6069	25.5562	25.7137	25.4146	25.6271	0.004916	0.00313593	0.212456	0.048891	1.31077	0.128474	0.891185
A0A0H3C8I2	A0A0H3C8I2_CAUVN			DnaJ-like protein djlA	0.000348797	11	10	9	10	10	10	10							24.5804	24.3228	24.265	24.471	24.8236	24.8754	24.5804	24.3228	24.265	24.471	24.8236	24.8754	24.396	24.7342	0.00688422	0.00889995	0.338133	0.0631963	1.19931	0.151881	0.818496
A0A0H3C8I3	A0A0H3C8I3_CAUVN			Uncharacterized protein	0.000348797	10	10	8	9	9	10	10							23.8606	23.6834	23.3186	24.1391	24.4802	23.9025	23.8606	23.6834	23.3186	24.1391	24.4802	23.9025	23.6381	24.1936	0.0116999	0.0120135	0.555525	0.0379992	1.42023	0.107882	0.967051
A0A0H3C8I4	A0A0H3C8I4_CAUVN			Cyclic di-GMP effector protein PopA	0.000348797	25	22	19	21	20	20	20							27.122	27.0277	27.1349	27.1691	26.9708	27.1305	27.122	27.0277	27.1349	27.1691	26.9708	27.1305	27.0957	27.0927	0.00216062	0.00388041	-0.00300606	0.950629	0.0219888	0.965978	0.015033
A0A0H3C8I5	A0A0H3C8I5_CAUVN			TetR-family transcriptional regulator	0.00235452	1	1	1	1	1	1	1							17.9676	17.8486	18.3338	17.6023	18.5353	18.4053	17.9676	17.8486	18.3338	17.6023	18.5353	18.4053	18.0651	18.2358	0.014007	0.0277935	0.170657	0.661408	0.179531	0.753083	0.123157
A0A0H3C8I6	A0A0H3C8I6_CAUVN			Uncharacterized protein	0.000348797	56	54	55	54	56	52	52							27.2593	27.2608	27.3564	27.4787	27.3791	27.1599	27.2593	27.2608	27.3564	27.4787	27.3791	27.1599	27.2929	27.3453	0.00203908	0.00596504	0.0524181	0.640532	0.193459	0.73755	0.132208
A0A0H3C8I7	A0A0H3C8I7_CAUVN	A0A0H3C8I7;A0A0H3CAY9	CCNA_01054;CCNA_02899	Tryptophan halogenase	0.000348797	8	7	8	8	8	8	7	1	1	1	1	1	1	24.0661	24.1373	24.1002	24.3197	24.2122	23.8712	24.0661	24.1373	24.1002	24.3197	24.2122	23.8712	24.1015	24.1467	0.00147579	0.00970224	0.0452334	0.799917	0.0969552	0.85754	0.0667454
A0A0H3C8I8	A0A0H3C8I8_CAUVN			Beta-lactamase, type II	0.000348797	16	16	16	15	12	12	13							28.11	28.0338	28.1153	27.6777	27.627	27.7063	28.11	28.0338	28.1153	27.6777	27.627	27.7063	28.0869	27.6707	0.00162389	0.00145169	-0.41616	0.000330937	3.48025	0.00632886	2.19867
A0A0H3C8I9	A0A0H3C8I9_CAUVN			ATP-dependent RNA helicase RhlB	0.000348797	41	39	36	37	37	38	36							28.8574	28.7976	28.8716	28.8952	28.8991	28.9688	28.8574	28.7976	28.8716	28.8952	28.8991	28.9688	28.8426	28.9215	0.00136205	0.00143195	0.0788989	0.178079	0.749388	0.304144	0.51692
A0A0H3C8J0	A0A0H3C8J0_CAUVN			Cell elongation specific D,D-transpeptidase	0.000348797	26	23	23	22	21	21	22							25.549	25.5818	25.5921	25.6705	25.7107	25.8286	25.549	25.5818	25.5921	25.6705	25.7107	25.8286	25.5744	25.7382	0.000878559	0.00319158	0.163773	0.038614	1.41325	0.109099	0.962179
A0A0H3C8J1	A0A0H3C8J1_CAUVN			S-layer protein rsaA	0.000348797	7	7	7	7	7	7	7							29.8466	29.6138	29.6111	29.2718	29.6766	29.6113	29.8466	29.6138	29.6111	29.2718	29.6766	29.6113	29.6948	29.5305	0.00455339	0.00736159	-0.164307	0.253404	0.596187	0.388595	0.410503
A0A0H3C8J2	A0A0H3C8J2_CAUVN			RimI-like acetyltransferase	0.000348797	7	6	5	7	5	6	5							24.0529	23.9216	24.0473	24.1286	24.0859	24.0172	24.0529	23.9216	24.0473	24.1286	24.0859	24.0172	24.0085	24.078	0.00309311	0.00233457	0.069462	0.310982	0.507264	0.446096	0.350572
A0A0H3C8J4	A0A0H3C8J4_CAUVN			2-amino-4-hydroxy-6-hydroxymethyldihydropteridine pyrophosphokinase	0.000348797	5	4	5	3	3	3	3							21.9811	21.715	20.2061	21.5961	21.5909	21.3648	21.9811	21.715	20.2061	21.5961	21.5909	21.3648	21.4828	21.5212	0.0449423	0.00613852	0.0384247	0.66952	0.174236	0.759527	0.119457
A0A0H3C8J5	A0A0H3C8J5_CAUVN			Perosamine synthetase PerA	0.000348797	25	24	23	25	24	24	25							27.8945	27.9309	28.0396	28.2066	28.1883	28.1409	27.8945	27.9309	28.0396	28.2066	28.1883	28.1409	27.9563	28.1789	0.00269962	0.00120266	0.222566	0.0108862	1.96312	0.0476626	1.32182
A0A0H3C8J6	A0A0H3C8J6_CAUVN			Aspartate kinase	0.000348797	3	1	1	1	1	3	2							18.9159	19.0401	19.8706	19.2268	20.7136	20.8894	18.9159	19.0401	19.8706	19.2268	20.7136	20.8894	19.341	20.4427	0.0269308	0.0450455	1.10161	0.108444	0.964792	0.217393	0.662755
A0A0H3C8J7	A0A0H3C8J7_CAUVN			Exopolyphosphatase GppA	0.000348797	15	14	13	13	12	13	12							25.0623	25.0076	25.1397	25.1775	25.1186	25.255	25.0623	25.0076	25.1397	25.1775	25.1186	25.255	25.0709	25.1848	0.00264879	0.00271481	0.113919	0.128068	0.892558	0.242872	0.614623
A0A0H3C8J9	A0A0H3C8J9_CAUVN			Methyltransferase	0.000348797	21	21	20	19	18	19	18							27.1033	27.0294	27.0743	26.8089	26.8521	26.7399	27.1033	27.0294	27.0743	26.8089	26.8521	26.7399	27.0693	26.8011	0.00137455	0.00211095	-0.26827	0.00334132	2.47608	0.0226835	1.64429
A0A0H3C8K1	A0A0H3C8K1_CAUVN			Signal peptidase I	0.000348797	18	16	17	18	17	17	17							27.2585	27.2663	27.2378	27.3305	27.1972	27.3224	27.2585	27.2663	27.2378	27.3305	27.1972	27.3224	27.2543	27.2846	0.000540434	0.00273888	0.0303773	0.627888	0.202118	0.727599	0.138108
A0A0H3C8K3	A0A0H3C8K3_CAUVN			tRNA/rRNA methyltransferase	0.000348797	28	26	26	25	27	26	28							26.8597	26.7897	26.7895	27.0571	26.9957	27.0705	26.8597	26.7897	26.7895	27.0571	26.9957	27.0705	26.8133	27.0415	0.00151112	0.00147399	0.228136	0.00532482	2.2737	0.0300678	1.5219
A0A0H3C8K5	A0A0H3C8K5_CAUVN			D-alanyl-D-alanine serine-type carboxypeptidase CrbA	0.000348797	20	19	20	19	18	19	19							25.9314	26.0494	25.7953	25.9897	26.0418	25.9387	25.9314	26.0494	25.7953	25.9897	26.0418	25.9387	25.9291	25.9907	0.00490547	0.00198348	0.0616172	0.452946	0.343953	0.575179	0.240197
A0A0H3C8K6	A0A0H3C8K6_CAUVN			Beta-lactamase family protein	0.000348797	16	15	15	13	15	14	14							25.111	25.0247	25.4401	25.5103	24.964	24.9703	25.111	25.0247	25.4401	25.5103	24.964	24.9703	25.2033	25.1718	0.00870126	0.0124688	-0.0314986	0.830001	0.0809211	0.878817	0.0561015
A0A0H3C8K7	A0A0H3C8K7_CAUVN			ATP-dependent transporter SufC	0.000348797	25	25	24	25	22	24	24							26.9542	26.9528	26.9545	27.0488	27.0228	27.0476	26.9542	26.9528	26.9545	27.0488	27.0228	27.0476	26.9538	27.0398	3.3472e-05	0.000541887	0.0859738	0.098044	1.00858	0.202316	0.693969
A0A0H3C8K8	A0A0H3C8K8_CAUVN			Uncharacterized protein	0.000348797	8	8	8	7	8	8	8							25.3601	25.1655	25.4059	25.7955	25.9517	25.734	25.3601	25.1655	25.4059	25.7955	25.9517	25.734	25.3142	25.83	0.00504403	0.00434592	0.515816	0.00211282	2.67514	0.0172509	1.76319
A0A0H3C8K9	A0A0H3C8K9_CAUVN			Putative poly-gamma-glutamate capsule biosynthesis protein	0.00069541	2	1	1	2	2	1	1							19.992	20.3189	19.287	20.2788	19.5444	18.6063	19.992	20.3189	19.287	20.2788	19.5444	18.6063	19.927	19.631	0.0265457	0.0430425	-0.295956	0.461753	0.33559	0.58196	0.235107
A0A0H3C8L1	A0A0H3C8L1_CAUVN			Chemotaxis motB protein	0.000348797	21	16	17	16	16	13	15							24.9547	24.8556	24.8014	25.0117	24.8189	24.9866	24.9547	24.8556	24.8014	25.0117	24.8189	24.9866	24.872	24.9416	0.00312591	0.00420292	0.0696476	0.41272	0.384344	0.539365	0.268117
A0A0H3C8L2	A0A0H3C8L2_CAUVN			Alpha/beta hydrolase family protein	0.000348797	12	12	11	10	12	11	12							27.5996	27.6388	27.48	27.8602	27.6843	27.8408	27.5996	27.6388	27.48	27.8602	27.6843	27.8408	27.5743	27.7972	0.00299949	0.00347021	0.22288	0.0295066	1.53008	0.092757	1.03265
A0A0H3C8L3	A0A0H3C8L3_CAUVN			Uncharacterized protein	0.000348797	11	10	11	11	10	10	11							25.1902	24.9742	25.0526	24.5242	24.7893	24.9755	25.1902	24.9742	25.0526	24.5242	24.7893	24.9755	25.0751	24.7747	0.00436096	0.00915869	-0.300399	0.0614302	1.21162	0.149899	0.824202
A0A0H3C8L4	A0A0H3C8L4_CAUVN	A0A0H3C8F5;A0A0H3C8L4	gyrA;parC	DNA gyrase subunit A	0.000348797	65	58	58	56	57	59	60	1	1	1	1	1	1	29.0684	28.9944	29.1883	29.363	29.2523	29.4377	29.0684	28.9944	29.1883	29.363	29.2523	29.4377	29.0859	29.353	0.00336302	0.00317858	0.267104	0.0173992	1.75947	0.0661169	1.17969
A0A0H3C8L5	A0A0H3C8L5_CAUVN			NAD-dependent oxidoreductase	0.000348797	5	3	4	5	2	2	2							21.9218	22.59	22.1862	21.4082	21.3418	21.3816	21.9218	22.59	22.1862	21.4082	21.3418	21.3816	22.2591	21.3775	0.0151349	0.00156338	-0.88166	0.00338039	2.47103	0.0227254	1.64349
A0A0H3C8L6	A0A0H3C8L6_CAUVN			Hybrid CAP effector domain/patatin phospholipase protein	0.000348797	13	11	10	12	10	10	10							23.2627	23.5377	23.6555	23.3491	23.4254	23.4498	23.2627	23.5377	23.6555	23.3491	23.4254	23.4498	23.4945	23.4088	0.0085833	0.00224352	-0.0857842	0.517184	0.286355	0.634611	0.197492
A0A0H3C8L7	A0A0H3C8L7_CAUVN			Bactofilin A BacA	0.000348797	11	11	11	11	10	10	10							27.268	27.2561	27.199	27.3787	27.2996	27.2456	27.268	27.2561	27.199	27.3787	27.2996	27.2456	27.2414	27.309	0.00135358	0.002451	0.0676327	0.288288	0.540174	0.423804	0.372835
A0A0H3C8L8	A0A0H3C8L8_CAUVN			Uncharacterized protein	0.000348797	34	32	34	34	32	33	32							28.8648	28.923	28.8608	28.6101	28.3603	28.4451	28.8648	28.923	28.8608	28.6101	28.3603	28.4451	28.8832	28.4756	0.00120552	0.00446162	-0.407565	0.00251121	2.60012	0.0186856	1.72849
A0A0H3C8L9	A0A0H3C8L9_CAUVN			Uncharacterized protein	0.000348797	6	5	5	6	5	6	5							24.0245	23.9821	24.0084	23.7678	23.7882	23.9017	24.0245	23.9821	24.0084	23.7678	23.7882	23.9017	24.0051	23.8205	0.000890676	0.00302756	-0.18462	0.0192008	1.71668	0.0702246	1.15351
A0A0H3C8M0	A0A0H3C8M0_CAUVN			Octanoyltransferase	0.000348797	6	5	5	6	5	5	5							23.9942	24.0036	23.9903	23.8432	23.9802	24.0268	23.9942	24.0036	23.9903	23.8432	23.9802	24.0268	23.996	23.9522	0.000285449	0.0039847	-0.043872	0.499976	0.301051	0.618521	0.208646
A0A0H3C8M1	A0A0H3C8M1_CAUVN			Gluconate 2-dehydrogenase subunit 3-family protein	0.000348797	2	2	2	1	1	1	1							22.5478	22.8442	22.0388	21.2549	20.6205	21.2639	22.5478	22.8442	22.0388	21.2549	20.6205	21.2639	22.5141	21.0762	0.0181221	0.0175283	-1.43791	0.00271333	2.5665	0.0197518	1.70439
A0A0H3C8M2	A0A0H3C8M2_CAUVN			Outer membrane protein	0.000348797	12	11	11	10	11	12	11							27.385	27.3502	27.4921	27.4181	27.5906	27.526	27.385	27.3502	27.4921	27.4181	27.5906	27.526	27.4104	27.5133	0.002698	0.00316689	0.102938	0.202518	0.693536	0.331123	0.480011
A0A0H3C8M3	A0A0H3C8M3_CAUVN			Two-component response regulator kdpE	0.000348797	9	7	8	7	8	9	8							23.8248	23.6699	23.5602	23.9565	23.8569	23.9118	23.8248	23.6699	23.5602	23.9565	23.8569	23.9118	23.6891	23.9089	0.0056141	0.00208621	0.219881	0.0382528	1.41734	0.108305	0.96535
A0A0H3C8M4	A0A0H3C8M4_CAUVN			Phenylalanine--tRNA ligase beta subunit	0.000348797	40	39	39	39	39	40	38							29.3111	29.2532	29.267	29.46	29.3694	29.4642	29.3111	29.2532	29.267	29.46	29.3694	29.4642	29.2773	29.4319	0.00103199	0.00181998	0.154561	0.0287969	1.54065	0.0911903	1.04005
A0A0H3C8M5	A0A0H3C8M5_CAUVN			CopY/TcrY family transcriptional repressor	0.000348797	5	5	5	5	4	5	5							22.2793	22.5775	22.6761	22.3593	22.3378	22.3958	22.2793	22.5775	22.6761	22.3593	22.3378	22.3958	22.5206	22.3645	0.00917706	0.00131128	-0.156046	0.241898	0.616367	0.375334	0.425583
A0A0H3C8M6	A0A0H3C8M6_CAUVN			GlcG-family protein	0.000348797	6	5	6	6	6	6	6							23.2592	23.318	23.3894	23.2537	23.0667	23.2032	23.2592	23.318	23.3894	23.2537	23.0667	23.2032	23.3232	23.1767	0.00279626	0.00417584	-0.146519	0.0898915	1.04628	0.192461	0.715658
A0A0H3C8M7	A0A0H3C8M7_CAUVN			NADH dehydrogenase	0.000348797	9	8	8	8	6	9	9							26.6293	26.6584	26.5941	26.8347	26.6859	26.7633	26.6293	26.6584	26.5941	26.8347	26.6859	26.7633	26.6275	26.7626	0.00120922	0.0027799	0.13511	0.0659864	1.18055	0.155617	0.807944
A0A0H3C8M8	A0A0H3C8M8_CAUVN			Transglutaminase-like enzyme	0.000348797	11	11	11	11	10	10	10							24.8947	25.0218	25.5111	24.9384	24.7832	24.7344	24.8947	25.0218	25.5111	24.9384	24.7832	24.7344	25.1678	24.8213	0.0129449	0.0042915	-0.346471	0.118285	0.927069	0.230691	0.63697
A0A0H3C8M9	A0A0H3C8M9_CAUVN			L-aminopeptidase/D-esterase dmpA	0.000348797	10	9	9	9	9	8	7							24.0118	24.0078	24.1206	23.8339	23.5803	23.7085	24.0118	24.0078	24.1206	23.8339	23.5803	23.7085	24.0477	23.7113	0.00266109	0.00534817	-0.336392	0.00759002	2.11976	0.0382796	1.41703
A0A0H3C8N0	A0A0H3C8N0_CAUVN			Uncharacterized protein	0.000348797	5	5	5	5	5	5	5							25.373	25.4441	25.3405	25.5642	25.5765	25.6635	25.373	25.4441	25.3405	25.5642	25.5765	25.6635	25.3865	25.6021	0.00208739	0.00211502	0.215527	0.0107332	1.96927	0.0475385	1.32295
A0A0H3C8N1	A0A0H3C8N1_CAUVN			Glycosyltransferase	0.000348797	15	14	14	14	15	13	12							24.5784	24.4987	24.623	25.0958	24.547	24.2806	24.5784	24.4987	24.623	25.0958	24.547	24.2806	24.5676	24.682	0.00256304	0.0168695	0.114397	0.739124	0.131283	0.809899	0.091569
A0A0H3C8N2	A0A0H3C8N2_CAUVN			Triosephosphate isomerase	0.000348797	26	26	25	26	24	26	24							26.4346	26.3434	26.3468	26.2348	26.2236	26.3455	26.4346	26.3434	26.3468	26.2348	26.2236	26.3455	26.3756	26.269	0.00195948	0.00256691	-0.106544	0.128695	0.890438	0.243471	0.613553
A0A0H3C8N3	A0A0H3C8N3_CAUVN			Carboxypeptidase G2	0.000348797	26	17	17	16	14	14	16							25.8988	25.7324	25.9135	25.9464	25.9068	26.0055	25.8988	25.7324	25.9135	25.9464	25.9068	26.0055	25.8505	25.9535	0.00389172	0.00191357	0.102941	0.189909	0.721455	0.316096	0.500181
A0A0H3C8N5	A0A0H3C8N5_CAUVN			Conserved hypothetical membrane protein	0.000348797	18	16	17	17	17	18	17							28.014	27.9246	27.9937	28.0916	28.0182	28.0722	28.014	27.9246	27.9937	28.0916	28.0182	28.0722	27.978	28.061	0.00167593	0.0013554	0.0830763	0.165064	0.782349	0.288575	0.539742
A0A0H3C8N6	A0A0H3C8N6_CAUVN			Conserved hypothetical cytosolic protein	0.000348797	51	50	48	47	45	47	46							28.1301	28.0627	28.059	28.1446	28.0333	28.067	28.1301	28.0627	28.059	28.1446	28.0333	28.067	28.0843	28.0824	0.00142452	0.00203244	-0.00187134	0.968586	0.013862	0.97732	0.00996305
A0A0H3C8N7	A0A0H3C8N7_CAUVN			3-demethoxyubiquinol 3-hydroxylase	0.000348797	14	13	14	13	13	13	12							25.7439	25.4832	25.5057	25.6049	25.7574	25.5926	25.7439	25.4832	25.5057	25.6049	25.7574	25.5926	25.5825	25.6536	0.00564788	0.00357899	0.0710466	0.467599	0.330126	0.587611	0.23091
A0A0H3C8N8	A0A0H3C8N8_CAUVN			LytT-family transcriptional regulator	0.000348797	3	2	2	2	3	2	2							21.7357	21.6014	21.5701	21.8119	21.6843	21.781	21.7357	21.6014	21.5701	21.8119	21.6843	21.781	21.6375	21.7601	0.00406467	0.00305957	0.122532	0.129933	0.88628	0.244871	0.611063
A0A0H3C8N9	A0A0H3C8N9_CAUVN			1-acyl-sn-glycerol-3-phosphate acyltransferase	0.000348797	15	14	13	14	12	13	14							25.4176	25.3255	25.3617	25.1556	25.1089	25.4264	25.4176	25.3255	25.3617	25.1556	25.1089	25.4264	25.3687	25.2372	0.00182848	0.00679405	-0.131526	0.212196	0.673264	0.342383	0.465487
A0A0H3C8P0	A0A0H3C8P0_CAUVN			Transporter, sodium/bile acid symporter family	0.00463423	1	0	0	1	1	1	1							NA	NA	23.6326	23.6394	23.0171	23.0217	21.2517	21.3044	23.6326	23.6394	23.0171	23.0217	22.5239	23.2569	0.0616266	0.015411	0.733026	0.151383	0.819923	0.271572	0.566114
A0A0H3C8P1	A0A0H3C8P1_CAUVN			Histidine kinase	0.000348797	3	3	3	3	3	2	2							21.4185	20.9669	20.9788	20.0012	19.5471	19.9138	21.4185	20.9669	20.9788	20.0012	19.5471	19.9138	21.1372	19.8337	0.0121836	0.0121575	-1.30345	0.000544379	3.2641	0.00856546	2.06725
A0A0H3C8P2	A0A0H3C8P2_CAUVN			Transcription elongation factor GreB	0.000348797	9	8	9	9	9	8	8							24.8839	24.8234	24.9053	25.203	24.9996	24.9781	24.8839	24.8234	24.9053	25.203	24.9996	24.9781	24.8713	25.0638	0.00170826	0.00495173	0.192567	0.054582	1.26295	0.137419	0.861955
A0A0H3C8P3	A0A0H3C8P3_CAUVN			Ribosomal RNA large subunit methyltransferase E	0.000348797	12	12	10	12	9	10	10							25.4443	25.3033	25.3955	25.4831	25.1093	25.0067	25.4443	25.3033	25.3955	25.4831	25.1093	25.0067	25.3822	25.2146	0.00282184	0.00995102	-0.167616	0.235235	0.628497	0.368015	0.434135
A0A0H3C8P5	A0A0H3C8P5_CAUVN			Glutamate--tRNA ligase	0.000348797	37	36	35	36	35	35	34							28.3615	28.3144	28.3723	28.4359	28.4188	28.3949	28.3615	28.3144	28.3723	28.4359	28.4188	28.3949	28.3496	28.4166	0.00108582	0.000725215	0.0669883	0.201932	0.694795	0.330966	0.480217
A0A0H3C8P7	A0A0H3C8P7_CAUVN			Uncharacterized protein	0.000348797	2	2	2	2	2	2	2							22.2841	22.3104	22.4019	22.4525	22.2229	22.4381	22.2841	22.3104	22.4019	22.4525	22.2229	22.4381	22.333	22.3749	0.00276955	0.00574823	0.041928	0.653933	0.184467	0.747458	0.126413
A0A0H3C8P9	A0A0H3C8P9_CAUVN			LysR-family transcriptional regulator	0.000348797	3	3	3	3	2	3	2							21.1124	20.9166	19.9679	19.4082	20.718	17.9753	21.1124	20.9166	19.9679	19.4082	20.718	17.9753	20.7449	19.7679	0.02962	0.0708309	-0.977049	0.136952	0.863432	0.253387	0.596216
A0A0H3C8Q0	A0A0H3C8Q0_CAUVN			Uncharacterized protein	0.000348797	4	4	4	4	4	4	4							22.6391	22.3876	22.5377	22.7363	22.5871	22.3925	22.6391	22.3876	22.5377	22.7363	22.5871	22.3925	22.5251	22.5788	0.00561682	0.00763593	0.0536545	0.674874	0.170777	0.76388	0.116975
A0A0H3C8Q1	A0A0H3C8Q1_CAUVN			UDP-2,3-diacylglucosamine pyrophosphatase LpxI	0.000348797	18	18	18	18	17	17	18							26.2992	26.2567	26.3141	26.2392	26.1259	26.168	26.2992	26.2567	26.3141	26.2392	26.1259	26.168	26.2902	26.1785	0.00113411	0.00218637	-0.111726	0.0837934	1.07679	0.183037	0.737462
A0A0H3C8Q2	A0A0H3C8Q2_CAUVN			Uncharacterized protein	0.000348797	11	11	11	10	10	10	10							27.1785	27.0662	27.1265	27.4126	27.2638	27.221	27.1785	27.0662	27.1265	27.4126	27.2638	27.221	27.1245	27.3015	0.00207205	0.00368367	0.177014	0.0527993	1.27737	0.134719	0.870573
A0A0H3C8Q3	A0A0H3C8Q3_CAUVN			3-oxoacyl-[acyl-carrier-protein] reductase	0.000348797	23	22	22	22	22	22	22							29.5347	29.5066	29.5591	29.9127	29.7848	29.9013	29.5347	29.5066	29.5591	29.9127	29.7848	29.9013	29.5336	29.8674	0.000889321	0.00236988	0.33381	0.00150764	2.8217	0.0142672	1.84566
A0A0H3C8Q4	A0A0H3C8Q4_CAUVN			Histidine kinase	0.000348797	23	22	19	21	18	22	20							26.5529	26.6323	26.7814	26.8557	26.6534	26.5814	26.5529	26.6323	26.7814	26.8557	26.6534	26.5814	26.6587	26.7016	0.00435147	0.00532582	0.0429002	0.696138	0.157305	0.77919	0.108357
A0A0H3C8Q5	A0A0H3C8Q5_CAUVN			Isoprenyl transferase	0.000348797	11	10	10	10	11	11	10							26.1094	25.9744	25.9246	26.23	26.081	26.1267	26.1094	25.9744	25.9246	26.23	26.081	26.1267	26.005	26.1473	0.00367782	0.00291908	0.14231	0.106183	0.973944	0.214425	0.668725
A0A0H3C8Q6	A0A0H3C8Q6_CAUVN			Cell division protein FtsX	0.000348797	11	10	10	8	10	9	10							25.0683	25.1085	25.2882	25.5044	25.1805	25.501	25.0683	25.1085	25.2882	25.5044	25.1805	25.501	25.1582	25.4031	0.00465528	0.00732607	0.244875	0.090212	1.04474	0.192732	0.715046
A0A0H3C8Q7	A0A0H3C8Q7_CAUVN			Guanylate kinase	0.000348797	16	14	16	15	14	12	12							26.2157	26.106	26.2593	26.2876	26.0785	26.2412	26.2157	26.106	26.2593	26.2876	26.0785	26.2412	26.1951	26.2052	0.00301686	0.00418952	0.0100814	0.915952	0.0381272	0.945045	0.0245475
A0A0H3C8Q8	A0A0H3C8Q8_CAUVN			Ribosomal-protein-alanine acetyltransferase	0.0010142	3	3	3	3	2	2	2							22.6681	22.6895	22.6173	20.7228	22.1976	22.5923	22.6681	22.6895	22.6173	20.7228	22.1976	22.5923	22.6586	22.0319	0.00163596	0.0451233	-0.626714	0.150005	0.823895	0.269901	0.568795
A0A0H3C8Q9	A0A0H3C8Q9_CAUVN			Chorismate mutase	0.000348797	18	18	18	18	17	16	16							27.0382	26.9334	26.9472	27.1747	26.9401	27.1839	27.0382	26.9334	26.9472	27.1747	26.9401	27.1839	26.9737	27.1039	0.00211149	0.00509961	0.13017	0.193296	0.713778	0.319795	0.495128
A0A0H3C8R0	A0A0H3C8R0_CAUVN			Lipoprotein-releasing system ATP-binding protein LolD	0.000348797	17	15	17	16	14	16	15							25.8646	25.9936	26.0109	26.1599	26.0698	25.993	25.8646	25.9936	26.0109	26.1599	26.0698	25.993	25.9578	26.0758	0.00308062	0.0032033	0.118015	0.154325	0.811565	0.274831	0.560935
A0A0H3C8R1	A0A0H3C8R1_CAUVN			4-hydroxythreonine-4-phosphate dehydrogenase	0.000348797	8	8	8	8	8	8	8							24.3573	24.2682	24.2818	24.4655	24.2197	24.4657	24.3573	24.2682	24.2818	24.4655	24.2197	24.4657	24.303	24.3882	0.00197591	0.00582193	0.0851891	0.382608	0.417246	0.515318	0.287925
A0A0H3C8R2	A0A0H3C8R2_CAUVN			Endoribonuclease L-PSP	0.000348797	12	12	12	12	12	12	12							26.6842	26.671	26.9255	26.5399	26.6111	26.6663	26.6842	26.671	26.9255	26.5399	26.6111	26.6663	26.7651	26.6067	0.00535434	0.00238076	-0.158348	0.136327	0.865419	0.252975	0.596923
A0A0H3C8R4	A0A0H3C8R4_CAUVN			Endo-1,3-1,4-beta glucanase-related protein	0.000348797	11	10	10	11	10	10	9							26.0123	26.012	26.0509	25.141	24.8891	25.0558	26.0123	26.012	26.0509	25.141	24.8891	25.0558	26.0252	25.0324	0.000858299	0.00511914	-0.992812	2.72987e-05	4.56386	0.00164939	2.78268
A0A0H3C8R5	A0A0H3C8R5_CAUVN			Metal-dependent hydrolase	0.000348797	33	31	32	31	30	32	32							27.7919	27.7301	27.602	28.1531	28.0271	28.1638	27.7919	27.7301	27.602	28.1531	28.0271	28.1638	27.7101	28.116	0.0034958	0.00270324	0.405843	0.00212357	2.67293	0.0172919	1.76216
A0A0H3C8R6	A0A0H3C8R6_CAUVN			Probable cytosol aminopeptidase	0.000348797	29	26	25	27	28	26	26							29.8625	29.7892	29.8241	30.0374	29.9926	29.9426	29.8625	29.7892	29.8241	30.0374	29.9926	29.9426	29.8256	29.9914	0.00122971	0.00158126	0.165812	0.0213968	1.66965	0.0756904	1.12096
A0A0H3C8R7	A0A0H3C8R7_CAUVN			TonB-dependent outer membrane receptor	0.000348797	8	8	8	8	2	2	2							22.1549	22.0709	22.6333	20.066	19.1859	20.5559	22.1549	22.0709	22.6333	20.066	19.1859	20.5559	22.3083	20.0406	0.0136127	0.0348205	-2.2677	0.00114552	2.941	0.0124911	1.9034
A0A0H3C8R8	A0A0H3C8R8_CAUVN			Cro/CI-family transcriptional regulator	0.000348797	2	2	2	0	0	2	1							18.8582	18.8	NA	NA	19.0025	18.3906	18.8582	18.8	19.3352	17.6386	19.0025	18.3906	19.0184	18.4481	0.015457	0.0372412	-0.570262	0.133096	0.875834	0.248635	0.604438
A0A0H3C8R9	A0A0H3C8R9_CAUVN			IolE-related protein	0.000348797	2	2	2	1	1	1	2							20.9153	20.1118	19.2993	17.8222	18.2535	18.7597	20.9153	20.1118	19.2993	17.8222	18.2535	18.7597	20.2557	18.3293	0.0401808	0.0256721	-1.92638	0.00925764	2.0335	0.0430929	1.36559
A0A0H3C8S0	A0A0H3C8S0_CAUVN			NADH-quinone oxidoreductase chain L	0.000348797	6	6	5	5	4	5	6							25.0956	25.0286	25.0577	25.0047	25.1246	25.2787	25.0956	25.0286	25.0577	25.0047	25.1246	25.2787	25.0609	25.1403	0.00134063	0.00546456	0.0794411	0.396482	0.401777	0.526232	0.278823
A0A0H3C8S1	A0A0H3C8S1_CAUVN	A0A0H3C8S1;A0A0H3CEI9	CCNA_01155;CCNA_03298	TonB-dependent outer membrane receptor	0.000348797	76	68	68	66	62	61	62	1	1	1	1	1	1	29.5408	29.535	29.5094	29.0649	29.072	29.0427	29.5408	29.535	29.5094	29.0649	29.072	29.0427	29.5285	29.0599	0.000564896	0.000527371	-0.468537	7.4812e-05	4.12603	0.00287793	2.54092
A0A0H3C8S2	A0A0H3C8S2_CAUVN			Uncharacterized protein	0.00069541	2	1	1	2	0	2	1							21.6971	21.647	22.0568	NA	21.8266	22.0978	21.6971	21.647	22.0568	19.2359	21.8266	22.0978	21.8122	21.4882	0.010255	0.0750388	-0.32395	0.385034	0.414501	0.517662	0.285953
A0A0H3C8S3	A0A0H3C8S3_CAUVN			2'-deoxycytidine 5'-triphosphate deaminase	0.000348797	18	17	16	16	15	16	18							26.911	26.8359	26.8458	26.7281	26.7138	26.7947	26.911	26.8359	26.8458	26.7281	26.7138	26.7947	26.8646	26.746	0.00151763	0.0016151	-0.118637	0.0657266	1.18226	0.155368	0.808639
A0A0H3C8S4	A0A0H3C8S4_CAUVN			DUF2147 domain-containing protein	0.000348797	8	7	8	7	6	7	7							24.102	24.0321	23.8012	23.3544	23.4155	23.2564	24.102	24.0321	23.8012	23.3544	23.4155	23.2564	23.9841	23.3436	0.0065651	0.00343779	-0.640487	0.000898888	3.04629	0.0109982	1.95868
A0A0H3C8S5	A0A0H3C8S5_CAUVN			Proton/sodium-glutamate symport protein	0.000348797	4	4	4	4	4	4	4							24.8642	24.7441	24.9216	25.0033	24.926	25.4319	24.8642	24.7441	24.9216	25.0033	24.926	25.4319	24.8452	25.1381	0.00364574	0.0108481	0.292902	0.116011	0.935501	0.227873	0.642306
A0A0H3C8S6	A0A0H3C8S6_CAUVN			NADH-quinone oxidoreductase	0.000348797	64	61	58	56	57	58	60							29.8867	29.8941	29.8786	30.1256	30.0114	30.0692	29.8867	29.8941	29.8786	30.1256	30.0114	30.0692	29.8865	30.0695	0.000260566	0.00189976	0.182974	0.0140315	1.8529	0.0568983	1.2449
A0A0H3C8S7	A0A0H3C8S7_CAUVN			Phosphoribosylglycinamide formyltransferase	0.000348797	9	9	9	9	8	8	8							25.406	25.3447	25.3639	25.411	25.2917	25.3687	25.406	25.3447	25.3639	25.411	25.2917	25.3687	25.3718	25.358	0.00123614	0.00238551	-0.0138257	0.799832	0.0970015	0.85754	0.0667454
A0A0H3C8S8	A0A0H3C8S8_CAUVN			2'-5' RNA ligase family protein	0.000348797	12	10	10	9	11	12	10							24.817	24.6802	24.3996	25.2061	25.0444	25.0524	24.817	24.6802	24.3996	25.2061	25.0444	25.0524	24.6425	25.1029	0.00863817	0.0036321	0.460368	0.0103685	1.98429	0.0464047	1.33344
A0A0H3C8S9	A0A0H3C8S9_CAUVN			Transport permease protein	0.000348797	2	2	2	2	1	2	2							22.0368	21.8131	22.3398	22.6672	22.7619	22.554	22.0368	21.8131	22.3398	22.6672	22.7619	22.554	22.0795	22.6635	0.0119815	0.00459371	0.584031	0.00808184	2.09249	0.0401566	1.39624
A0A0H3C8T1	A0A0H3C8T1_CAUVN			NTF2 superfamily protein	0.000348797	7	6	5	4	6	5	5							25.91	26.0537	26.1794	26.4763	26.4925	26.344	25.91	26.0537	26.1794	26.4763	26.4925	26.344	26.0519	26.4391	0.00517651	0.00308041	0.387203	0.00581046	2.23579	0.0320903	1.49363
A0A0H3C8T2	A0A0H3C8T2_CAUVN			RNA polymerase sigma factor	0.000348797	3	3	3	3	3	3	3							22.0584	22.0807	22.1061	21.9972	22.3812	22.2361	22.0584	22.0807	22.1061	21.9972	22.3812	22.2361	22.0818	22.2134	0.0010801	0.00873343	0.131578	0.292299	0.534173	0.427685	0.368876
A0A0H3C8T3	A0A0H3C8T3_CAUVN			Uncharacterized protein	0.000348797	4	4	4	4	4	4	4							23.0487	23.1765	23.144	22.0164	22.1875	21.9607	23.0487	23.1765	23.144	22.0164	22.1875	21.9607	23.1241	22.0581	0.00287319	0.00535879	-1.06596	2.20616e-05	4.65636	0.00151473	2.81966
A0A0H3C8T4	A0A0H3C8T4_CAUVN			Lipid A biosynthesis lauroyl acyltransferase	0.000348797	13	11	11	12	13	13	12							25.7208	25.737	25.8938	26.2113	26.2146	26.0352	25.7208	25.737	25.8938	26.2113	26.2146	26.0352	25.786	26.1561	0.0037054	0.00392539	0.370067	0.0049929	2.30165	0.0285709	1.54408
A0A0H3C8T5	A0A0H3C8T5_CAUVN			Histidine phosphotransferase ShpA	0.000348797	4	4	4	3	3	4	4							23.3209	23.1818	23.4489	23.3017	23.4297	23.255	23.3209	23.1818	23.4489	23.3017	23.4297	23.255	23.3213	23.3307	0.00572764	0.00387537	0.00942045	0.902288	0.044655	0.934137	0.0295895
A0A0H3C8T6	A0A0H3C8T6_CAUVN			Beta-barrel assembly machine (BAM) protein BamB	0.000348797	34	34	33	34	31	31	32							29.578	29.5701	29.5728	29.5562	29.4433	29.4752	29.578	29.5701	29.5728	29.5562	29.4433	29.4752	29.5737	29.4923	0.000135954	0.00197287	-0.0813279	0.165971	0.779969	0.28949	0.538366
A0A0H3C8T7	A0A0H3C8T7_CAUVN			Luciferase-like monooxygenase	0.000348797	8	6	6	8	7	6	7							23.9225	23.9621	24.3198	24.1128	23.7805	23.7727	23.9225	23.9621	24.3198	24.1128	23.7805	23.7727	24.0795	23.8976	0.00909249	0.00812633	-0.181895	0.28364	0.547232	0.418602	0.378199
A0A0H3C8T8	A0A0H3C8T8_CAUVN			Uncharacterized protein	0.000348797	12	11	12	12	11	11	11							25.076	24.9699	25.1314	24.7031	24.4029	24.4051	25.076	24.9699	25.1314	24.7031	24.4029	24.4051	25.0607	24.5107	0.00327522	0.00704712	-0.549922	0.00235777	2.6275	0.0182276	1.73927
A0A0H3C8T9	A0A0H3C8T9_CAUVN			Uncharacterized protein	0.000348797	7	7	6	6	6	7	6							23.3626	23.1759	23.6493	23.7169	23.9343	23.6748	23.3626	23.1759	23.6493	23.7169	23.9343	23.6748	23.4092	23.7799	0.0101921	0.00585809	0.370641	0.0417807	1.37902	0.114641	0.940661
A0A0H3C8U0	A0A0H3C8U0_CAUVN			Amidophosphoribosyltransferase	0.000348797	28	27	27	26	25	25	27							28.1568	28.211	28.2258	28.5408	28.3947	28.3401	28.1568	28.211	28.2258	28.5408	28.3947	28.3401	28.1981	28.4277	0.00128877	0.0036512	0.229539	0.0191047	1.71886	0.0701033	1.15426
A0A0H3C8U1	A0A0H3C8U1_CAUVN			Uncharacterized protein	0.000348797	9	9	9	9	9	9	8							27.3891	27.3711	27.5397	27.5956	27.4724	27.5503	27.3891	27.3711	27.5397	27.5956	27.4724	27.5503	27.4353	27.5403	0.00337514	0.00226335	0.10498	0.183719	0.735846	0.309799	0.508921
A0A0H3C8U2	A0A0H3C8U2_CAUVN			Putative pentapeptide repeat protein	0.000348797	23	20	21	20	20	21	18							26.1542	26.3848	26.0619	26.3003	26.2011	25.3783	26.1542	26.3848	26.0619	26.3003	26.2011	25.3783	26.2068	26.0148	0.00634668	0.0194944	-0.192019	0.406123	0.391343	0.53413	0.272353
A0A0H3C8U3	A0A0H3C8U3_CAUVN			Acetyltransferase, GNAT family	0.000348797	4	4	4	4	4	4	4							23.7257	23.7632	24.3137	24.2941	24.2874	24.0525	23.7257	23.7632	24.3137	24.2941	24.2874	24.0525	23.9602	24.2156	0.0137542	0.00568162	0.255444	0.182886	0.737819	0.309455	0.509402
A0A0H3C8U4	A0A0H3C8U4_CAUVN			Nitrogen regulatory protein P-II	0.000348797	12	12	12	12	10	12	12							27.0729	26.987	27.5207	27.0751	27.0284	27.4597	27.0729	26.987	27.5207	27.0751	27.0284	27.4597	27.2131	27.201	0.010538	0.00870625	-0.0120856	0.97646	0.0103455	0.983562	0.0071982
A0A0H3C8U6	A0A0H3C8U6_CAUVN			Pyruvate dehydrogenase E1 component subunit alpha	0.000348797	44	44	42	41	40	40	43							30.1796	30.1031	30.2794	30.3885	30.2786	30.2819	30.1796	30.1031	30.2794	30.3885	30.2786	30.2819	30.1892	30.3173	0.00292865	0.00206239	0.128071	0.113252	0.945954	0.224203	0.649358
A0A0H3C8U8	A0A0H3C8U8_CAUVN			Imidazolonepropionase related amidohydrolase	0.000348797	31	24	24	26	23	21	23							27.0681	27.0003	27.292	26.5896	26.5669	26.6999	27.0681	27.0003	27.292	26.5896	26.5669	26.6999	27.1256	26.62	0.0056274	0.00267354	-0.505584	0.00234876	2.62916	0.0182276	1.73927
A0A0H3C8U9	A0A0H3C8U9_CAUVN			Nucleoside phosphorylase	0.000348797	14	13	14	13	12	13	13							25.5379	25.3784	25.6115	25.5003	25.3285	25.4613	25.5379	25.3784	25.6115	25.5003	25.3285	25.4613	25.5125	25.4319	0.00467259	0.00354197	-0.0806263	0.392193	0.4065	0.523326	0.281227
A0A0H3C8V0	A0A0H3C8V0_CAUVN			Uncharacterized protein	0.00235452	1	1	1	1	1	1	1							24.0135	24.0134	23.6491	23.888	24.0064	23.5127	24.0135	24.0134	23.6491	23.888	24.0064	23.5127	23.9019	23.8173	0.0088036	0.0108287	-0.0846517	0.61891	0.208373	0.721067	0.142025
A0A0H3C8V1	A0A0H3C8V1_CAUVN			Glutathione peroxidase	0.000348797	13	13	13	13	12	13	13							27.3239	27.313	27.3182	27.5278	27.5147	27.4772	27.3239	27.313	27.3182	27.5278	27.5147	27.4772	27.3184	27.5067	0.000199597	0.00095518	0.188326	0.00684685	2.16451	0.0356013	1.44853
A0A0H3C8V5	A0A0H3C8V5_CAUVN			Ribosome association toxin RatA	0.000348797	6	6	6	6	5	6	6							22.9862	23.0312	23.0252	23.0688	23.3206	23.3119	22.9862	23.0312	23.0252	23.0688	23.3206	23.3119	23.0144	23.2384	0.00106097	0.00615261	0.224022	0.0427461	1.3691	0.116549	0.933493
A0A0H3C8V6	A0A0H3C8V6_CAUVN			Holdfast glycosyl transferase family 2 protein HfsL	0.000348797	12	11	12	11	12	12	12							24.6653	24.6404	24.6024	24.8957	24.9203	25.0373	24.6653	24.6404	24.6024	24.8957	24.9203	25.0373	24.6363	24.9524	0.00128658	0.00303174	0.316163	0.0023406	2.63067	0.0182241	1.73935
A0A0H3C8V7	A0A0H3C8V7_CAUVN			Iron-regulated outer membrane virulence protein	0.000348797	38	34	35	36	32	33	30							27.316	27.1034	27.3315	27.1807	27.1948	27.0277	27.316	27.1034	27.3315	27.1807	27.1948	27.0277	27.254	27.1363	0.00467837	0.00341618	-0.117639	0.244416	0.61187	0.378269	0.422199
A0A0H3C8V9	A0A0H3C8V9_CAUVN			Outer membrane protein assembly factor BamD	0.000348797	29	29	29	29	27	28	29							27.7208	27.709	27.7682	27.7625	27.7893	27.7461	27.7208	27.709	27.7682	27.7625	27.7893	27.7461	27.7329	27.7661	0.00113076	0.000784232	0.0332118	0.502935	0.298488	0.621164	0.206794
A0A0H3C8W0	A0A0H3C8W0_CAUVN			Histidine kinase	0.000348797	19	19	18	16	17	18	17							24.9239	24.8972	24.812	25.0938	24.9815	25.1608	24.9239	24.8972	24.812	25.0938	24.9815	25.1608	24.8785	25.0806	0.00234956	0.00361369	0.202125	0.0288874	1.53929	0.091349	1.0393
A0A0H3C8W2	A0A0H3C8W2_CAUVN			Glucoamylase	0.000348797	22	22	21	22	20	19	19							24.8817	24.6369	24.8355	24.1514	24.047	23.904	24.8817	24.6369	24.8355	24.1514	24.047	23.904	24.7885	24.0377	0.00524753	0.00516674	-0.750875	0.000424386	3.37224	0.0071624	2.14494
A0A0H3C8W3	A0A0H3C8W3_CAUVN			Mth938-like membrane protein	0.000348797	6	6	6	6	6	6	5							24.4082	24.3395	24.4274	24.2806	24.3591	24.2923	24.4082	24.3395	24.4274	24.2806	24.3591	24.2923	24.3922	24.3111	0.00189412	0.00174124	-0.0811368	0.17914	0.746807	0.305063	0.51561
A0A0H3C8W4	A0A0H3C8W4_CAUVN			Melibiose carrier protein	0.000348797	2	2	1	1	1	1	1							20.6659	20.2633	19.8135	19.5667	19.4757	19.6165	20.6659	20.2633	19.8135	19.5667	19.4757	19.6165	20.2891	19.5541	0.0210621	0.00365188	-0.734927	0.0217357	1.66283	0.0763419	1.11724
A0A0H3C8W5	A0A0H3C8W5_CAUVN			Methyltransferase	0.000348797	11	10	10	10	9	9	8							24.5335	24.5685	24.6055	24.3295	24.2752	24.1141	24.5335	24.5685	24.6055	24.3295	24.2752	24.1141	24.5694	24.2424	0.00146471	0.00462244	-0.326996	0.00486084	2.31329	0.0283046	1.54814
A0A0H3C8W7	A0A0H3C8W7_CAUVN			Uncharacterized protein	0.000348797	7	7	7	7	7	6	6							23.4223	23.3504	23.3518	23.5984	23.4498	23.1314	23.4223	23.3504	23.3518	23.5984	23.4498	23.1314	23.3752	23.4061	0.00175957	0.0101981	0.0308807	0.890162	0.0505308	0.924117	0.0342731
A0A0H3C8W8	A0A0H3C8W8_CAUVN	A0A0H3C8W8;A0A0H3CAE7	CCNA_01830;malA	TonB-dependent maltose outer membrane transporter malA	0.000348797	39	38	35	39	33	29	35	1	1	1	1	1	1	26.9593	26.9968	27.3794	25.989	25.6854	26.0138	26.9593	26.9968	27.3794	25.989	25.6854	26.0138	27.1247	25.9036	0.00857507	0.00706063	-1.22108	0.000334981	3.47498	0.00634098	2.19784
A0A0H3C8W9	A0A0H3C8W9_CAUVN			Cupin domain transcriptional regulator	0.000348797	8	7	8	8	8	7	7							24.3199	24.3157	24.1544	24.1461	24.1275	24.1252	24.3199	24.3157	24.1544	24.1461	24.1275	24.1252	24.2654	24.133	0.00389057	0.000475448	-0.132388	0.0902649	1.04448	0.192732	0.715046
A0A0H3C8X0	A0A0H3C8X0_CAUVN			dATP pyrophosphohydrolase	0.000348797	29	27	27	29	26	28	26							27.3691	27.3166	27.3515	27.5023	27.3455	27.3873	27.3691	27.3166	27.3515	27.5023	27.3455	27.3873	27.3459	27.4133	0.000976206	0.00296222	0.0673582	0.317288	0.498546	0.452563	0.344321
A0A0H3C8X1	A0A0H3C8X1_CAUVN			Glucosylceramidase	0.000348797	2	2	2	2	2	2	2							20.8977	20.9388	20.337	20.1086	20.7961	20.3196	20.8977	20.9388	20.337	20.1086	20.7961	20.3196	20.7494	20.4374	0.0162237	0.0172585	-0.311959	0.248228	0.605149	0.382796	0.417033
A0A0H3C8X4	A0A0H3C8X4_CAUVN			Phosphatidylglycerophosphate synthase	0.000348797	12	11	11	10	10	12	11							26.9068	26.8969	27.0845	27.2297	27.1092	27.2611	26.9068	26.8969	27.0845	27.2297	27.1092	27.2611	26.9654	27.2015	0.00391565	0.00294709	0.23613	0.0259359	1.5861	0.0855376	1.06784
A0A0H3C8X5	A0A0H3C8X5_CAUVN			Chromosome segregation and condensation protein fusion scpA	0.000348797	3	3	3	2	2	2	2							22.9094	22.6919	22.2891	22.4825	22.6468	22.5176	22.9094	22.6919	22.2891	22.4825	22.6468	22.5176	22.6525	22.5507	0.0139063	0.00383669	-0.101751	0.64597	0.189787	0.74214	0.129514
A0A0H3C8X6	A0A0H3C8X6_CAUVN			MerR-family transcriptional regulator	0.000348797	14	13	14	14	13	14	14							24.436	24.563	24.8098	24.4333	24.3299	24.6051	24.436	24.563	24.8098	24.4333	24.3299	24.6051	24.6114	24.4606	0.00772528	0.00568454	-0.150783	0.28569	0.544105	0.420394	0.376344
A0A0H3C8X7	A0A0H3C8X7_CAUVN			NADH-ubiquinone oxidoreductase	0.000348797	13	12	13	13	12	12	13							24.4086	24.3492	24.556	24.4223	24.6795	24.6887	24.4086	24.3492	24.556	24.4223	24.6795	24.6887	24.4406	24.602	0.00435632	0.00614788	0.161465	0.171361	0.766089	0.295987	0.528728
A0A0H3C8X8	A0A0H3C8X8_CAUVN			Uncharacterized protein	0.000348797	4	4	3	4	2	2	2							22.0892	22.1796	22.5605	21.4441	21.2635	21.2005	22.0892	22.1796	22.5605	21.4441	21.2635	21.2005	22.2913	21.3064	0.0112287	0.00593614	-0.984856	0.000794441	3.09994	0.0105727	1.97581
A0A0H3C8X9	A0A0H3C8X9_CAUVN			Uncharacterized protein	0.000348797	11	11	11	10	10	10	11							24.3285	24.5718	24.525	24.5094	24.3604	24.6085	24.3285	24.5718	24.525	24.5094	24.3604	24.6085	24.4789	24.4964	0.00527568	0.00509782	0.0174479	0.864231	0.0633701	0.906588	0.0425901
A0A0H3C8Y0	A0A0H3C8Y0_CAUVN			Two-component response regulator protein	0.000348797	14	14	14	14	11	14	12							26.5244	26.6973	26.4906	26.4606	26.5558	26.5564	26.5244	26.6973	26.4906	26.4606	26.5558	26.5564	26.5736	26.525	0.00417141	0.00207738	-0.0486732	0.558051	0.253326	0.669795	0.174058
A0A0H3C8Y1	A0A0H3C8Y1_CAUVN			Alkanesulfonate monooxygenase	0.000348797	7	7	7	7	7	7	7							23.7027	23.6663	23.7576	24.074	23.911	23.868	23.7027	23.6663	23.7576	24.074	23.911	23.868	23.7094	23.9537	0.00193835	0.00453647	0.244375	0.0178115	1.7493	0.0670021	1.17391
A0A0H3C8Y3	A0A0H3C8Y3_CAUVN			Quinol cytochrome oxidase polypeptide I	0.000348797	9	9	9	9	9	9	9							27.4749	27.7642	27.5702	27.3695	27.5349	27.5512	27.4749	27.7642	27.5702	27.3695	27.5349	27.5512	27.6082	27.4875	0.00534111	0.00365824	-0.120663	0.278745	0.554793	0.414101	0.382893
A0A0H3C8Y4	A0A0H3C8Y4_CAUVN			Parvulin-like PPIase	0.000348797	36	36	35	36	36	36	36							28.8585	28.8173	28.8531	28.7826	28.6997	28.634	28.8585	28.8173	28.8531	28.7826	28.6997	28.634	28.8431	28.7067	0.000776404	0.00259534	-0.13634	0.0576414	1.23927	0.143439	0.843334
A0A0H3C8Y5	A0A0H3C8Y5_CAUVN			CusF-family protein	0.000348797	7	6	7	7	6	7	7							25.1626	25.1845	25.0977	24.9003	24.9091	25.0934	25.1626	25.1845	25.0977	24.9003	24.9091	25.0934	25.1487	24.9704	0.00179581	0.00436625	-0.178349	0.0504755	1.29692	0.130905	0.883045
A0A0H3C8Y7	A0A0H3C8Y7_CAUVN			Superoxide dismutase	0.000348797	16	9	9	11	7	7	7							26.2936	26.4105	26.8002	25.9592	25.7354	25.8581	26.2936	26.4105	26.8002	25.9592	25.7354	25.8581	26.5181	25.8538	0.0100104	0.00433594	-0.664332	0.00591371	2.22814	0.0324824	1.48835
A0A0H3C8Z0	A0A0H3C8Z0_CAUVN			Glycosyl hydrolase	0.000348797	6	6	6	6	5	6	6							23.968	24.0461	24.1381	23.6685	24.0788	23.9738	23.968	24.0461	24.1381	23.6685	24.0788	23.9738	24.0524	23.9173	0.00354054	0.00891465	-0.135135	0.285193	0.544861	0.419867	0.376888
A0A0H3C8Z1	A0A0H3C8Z1_CAUVN			ATP-dependent helicase hrpB	0.000348797	30	23	24	24	19	20	22							24.5968	24.6804	24.7781	24.6052	24.2843	24.5734	24.5968	24.6804	24.7781	24.6052	24.2843	24.5734	24.687	24.4947	0.00367682	0.00721821	-0.19235	0.119855	0.921343	0.233022	0.632604
A0A0H3C8Z2	A0A0H3C8Z2_CAUVN			Iron-regulated membrane protein	0.000348797	13	13	13	13	12	12	12							26.4676	26.6183	26.5871	26.227	26.1038	26.3572	26.4676	26.6183	26.5871	26.227	26.1038	26.3572	26.5591	26.2331	0.00299613	0.0048314	-0.326081	0.0102543	1.9891	0.0462361	1.33502
A0A0H3C8Z3	A0A0H3C8Z3_CAUVN			23S rRNA methyltransferase	0.000348797	6	5	5	4	4	4	3							22.0636	22.9063	22.6495	22.3452	21.4323	21.4315	22.0636	22.9063	22.6495	22.3452	21.4323	21.4315	22.5811	21.8043	0.0191634	0.0242582	-0.776813	0.0604085	1.2189	0.148128	0.829362
A0A0H3C8Z4	A0A0H3C8Z4_CAUVN			DNA polymerase III, chi subunit	0.000348797	7	6	6	6	6	7	5							22.3653	21.986	21.6603	21.9602	22.0883	22.1161	22.3653	21.986	21.6603	21.9602	22.0883	22.1161	22.0327	22.0564	0.0160352	0.00376931	0.0237659	0.792372	0.101071	0.851568	0.0697807
A0A0H3C8Z5	A0A0H3C8Z5_CAUVN			TolB protein/tail-specific protease	0.000348797	8	8	8	7	5	7	7							22.9959	22.7981	22.8001	22.0129	22.5059	22.582	22.9959	22.7981	22.8001	22.0129	22.5059	22.582	22.8677	22.3881	0.00496946	0.013813	-0.479615	0.0285795	1.54395	0.0907266	1.04227
A0A0H3C8Z6	A0A0H3C8Z6_CAUVN			TetR-family transcriptional regulator	0.000348797	8	8	7	8	7	6	8							24.2483	24.2609	24.2938	24.2215	23.7907	24.0865	24.2483	24.2609	24.2938	24.2215	23.7907	24.0865	24.2678	24.0439	0.000968313	0.00916779	-0.223881	0.0978408	1.00948	0.202316	0.693969
A0A0H3C8Z7	A0A0H3C8Z7_CAUVN			Periplasmic multidrug efflux lipoprotein	0.000348797	8	7	7	8	7	6	6							23.9131	23.8132	23.9746	23.1578	23.0386	23.6722	23.9131	23.8132	23.9746	23.1578	23.0386	23.6722	23.9018	23.3166	0.00340764	0.0144563	-0.58521	0.0157928	1.80154	0.0621226	1.20675
A0A0H3C8Z8	A0A0H3C8Z8_CAUVN			4-hydroxy-tetrahydrodipicolinate synthase	0.000348797	22	19	20	21	20	20	21							28.177	28.1052	28.1265	28.1598	28.1536	28.2387	28.177	28.1052	28.1265	28.1598	28.1536	28.2387	28.1366	28.1845	0.00131146	0.00168411	0.0479734	0.395994	0.402311	0.525846	0.279142
A0A0H3C8Z9	A0A0H3C8Z9_CAUVN			ABC transporter ATP-binding protein	0.000348797	16	15	16	16	14	16	15							25.1389	25.1548	25.0878	25.035	24.9291	24.992	25.1389	25.1548	25.0878	25.035	24.9291	24.992	25.1274	24.986	0.00139169	0.00213172	-0.141415	0.0402152	1.39561	0.111741	0.951786
A0A0H3C902	A0A0H3C902_CAUVN			Class II aldolase and Adducin protein	0.000348797	16	16	15	14	13	14	12							26.6213	26.6598	26.6716	26.342	26.312	26.3534	26.6213	26.6598	26.6716	26.342	26.312	26.3534	26.651	26.3359	0.000986561	0.000811547	-0.315115	0.000692421	3.15963	0.00992482	2.00328
A0A0H3C903	A0A0H3C903_CAUVN			Histidine kinase	0.000348797	14	11	12	12	9	10	12							23.8834	24.2302	24.0077	23.6278	25.4678	25.0194	23.8834	24.2302	24.0077	23.6278	25.4678	25.0194	24.0476	24.8916	0.00730805	0.0388364	0.843967	0.224189	0.649385	0.355712	0.448901
A0A0H3C907	A0A0H3C907_CAUVN			Acyl-CoA dehydrogenase	0.00235452	1	1	1	1	1	1	1							15.8381	16.3051	14.5259	16.9986	16.3395	14.5919	15.8381	16.3051	14.5259	16.9986	16.3395	14.5919	15.7308	16.279	0.0592991	0.0778446	0.548199	0.605787	0.21768	0.710461	0.14846
A0A0H3C908	A0A0H3C908_CAUVN			DadA-related amino acid oxidase	0.000348797	9	9	9	9	8	8	9							24.7976	24.8002	24.5618	24.5707	24.5871	24.651	24.7976	24.8002	24.5618	24.5707	24.5871	24.651	24.7241	24.6033	0.00553758	0.00172403	-0.120804	0.211715	0.674248	0.342211	0.465706
A0A0H3C909	A0A0H3C909_CAUVN			Uncharacterized protein	0.0010142	1	1	1	1	1	1	1							21.3244	21.416	21.6201	21.4884	21.2767	21.506	21.3244	21.416	21.6201	21.4884	21.2767	21.506	21.4589	21.4274	0.00705644	0.00595505	-0.0314582	0.790535	0.102079	0.850803	0.0701708
A0A0H3C912	A0A0H3C912_CAUVN			TonB1 protein	0.000348797	19	17	17	19	18	18	18							30.5052	30.4503	30.4942	30.5582	30.2863	30.4982	30.5052	30.4503	30.4942	30.5582	30.2863	30.4982	30.4834	30.4522	0.000953536	0.00469059	-0.0312443	0.686243	0.163522	0.773271	0.111668
A0A0H3C913	A0A0H3C913_CAUVN			ABC transporter ATP-binding protein	0.000348797	22	22	22	21	20	22	20							26.01	26.0175	25.9776	26.0999	25.9927	25.9787	26.01	26.0175	25.9776	26.0999	25.9927	25.9787	26.0018	26.0248	0.000815298	0.00254768	0.0230075	0.701685	0.153858	0.783367	0.106035
A0A0H3C914	A0A0H3C914_CAUVN			Cytochrome c5	0.0010142	2	2	2	1	2	1	2							20.6182	19.5919	20.9536	20.0535	18.2629	20.3111	20.6182	19.5919	20.9536	20.0535	18.2629	20.3111	20.4941	19.7815	0.0347987	0.0570863	-0.712574	0.249452	0.603013	0.384095	0.415561
A0A0H3C915	A0A0H3C915_CAUVN			Pyruvate kinase	0.000348797	35	34	33	35	34	35	35							28.0765	27.9904	28.0728	28.1541	28.131	28.2065	28.0765	27.9904	28.0728	28.1541	28.131	28.2065	28.0471	28.1642	0.00173525	0.00137406	0.117086	0.0712424	1.14726	0.163238	0.78718
A0A0H3C917	A0A0H3C917_CAUVN			Glycerol kinase	0.000348797	27	27	25	26	26	25	26							26.4964	26.4192	26.4042	26.0689	25.8791	26.1086	26.4964	26.4192	26.4042	26.0689	25.8791	26.1086	26.4405	26.0223	0.00187105	0.00471409	-0.418188	0.00227429	2.64315	0.0179445	1.74607
A0A0H3C918	A0A0H3C918_CAUVN			TetR-family transcriptional regulator	0.000348797	4	4	4	4	4	4	3							21.2615	21.3605	21.0597	21.127	21.1088	21.0234	21.2615	21.3605	21.0597	21.127	21.1088	21.0234	21.2326	21.0871	0.00722251	0.00262399	-0.145513	0.178343	0.748745	0.30422	0.516813
A0A0H3C919	A0A0H3C919_CAUVN			DNA polymerase III, delta' subunit	0.000348797	20	15	12	15	11	13	15							24.6341	25.1183	25.1113	24.6118	24.7071	25.795	24.6341	25.1183	25.1113	24.6118	24.7071	25.795	24.9717	25.1442	0.0111213	0.0262543	0.172583	0.823206	0.0844916	0.874439	0.0582705
A0A0H3C920	A0A0H3C920_CAUVN			Uncharacterized protein	0.000348797	2	1	2	2	2	1	2							19.7921	21.3176	21.917	22.2248	19.7069	21.9385	19.7921	21.3176	21.917	22.2248	19.7069	21.9385	21.2499	21.6359	0.0521488	0.0647486	0.386071	0.759292	0.119591	0.824226	0.0839536
A0A0H3C921	A0A0H3C921_CAUVN			Histidinol dehydrogenase	0.000348797	25	24	24	24	24	23	22							27.0993	27.0696	26.9606	27.0967	27.0415	27.0919	27.0993	27.0696	26.9606	27.0967	27.0415	27.0919	27.0444	27.0769	0.00270058	0.00112922	0.0325977	0.58415	0.233476	0.693133	0.159184
A0A0H3C924	A0A0H3C924_CAUVN			Phosphoribosylformylglycinamidine cyclo-ligase	0.000348797	20	17	18	18	18	18	20							27.2769	27.1717	27.205	27.2957	27.3405	27.4292	27.2769	27.1717	27.205	27.2957	27.3405	27.4292	27.2186	27.3562	0.00197442	0.00248415	0.137613	0.067848	1.16846	0.158413	0.800209
A0A0H3C925	A0A0H3C925_CAUVN			ABC transporter substrate-binding protein	0.000348797	12	11	12	12	11	11	9							24.2093	24.6707	25.35	23.9837	23.899	23.707	24.2093	24.6707	25.35	23.9837	23.899	23.707	24.8202	23.8678	0.0231908	0.00594217	-0.952409	0.0278559	1.55508	0.0891446	1.0499
A0A0H3C926	A0A0H3C926_CAUVN			LysR-family transcriptional regulator	0.0010142	2	2	1	2	2	1	1							20.7428	20.499	20.1882	20.0849	19.4828	20.4926	20.7428	20.499	20.1882	20.0849	19.4828	20.4926	20.4943	20.0779	0.0135765	0.0253763	-0.41646	0.171261	0.766341	0.295987	0.528728
A0A0H3C927	A0A0H3C927_CAUVN			Stalk-specific protein X	0.000348797	17	17	17	17	17	17	17							26.5667	26.4672	26.7925	26.6814	26.7911	26.7826	26.5667	26.4672	26.7925	26.6814	26.7911	26.7826	26.6153	26.7525	0.00626471	0.00228156	0.137281	0.198324	0.702624	0.326862	0.485636
A0A0H3C928	A0A0H3C928_CAUVN			Exopolyphosphatase	0.000348797	31	23	27	28	26	25	28							26.9342	27.0132	26.8955	27.1154	27.1463	27.3174	26.9342	27.0132	26.8955	27.1154	27.1463	27.3174	26.9485	27.1958	0.00222704	0.00400087	0.247346	0.0193137	1.71414	0.0704669	1.15201
A0A0H3C929	A0A0H3C929_CAUVN			16S rRNA m(2)G 1207 methyltransferase RsmC	0.000348797	13	13	11	12	12	12	12							26.2999	26.2986	26.3128	26.5402	26.2696	26.3641	26.2999	26.2986	26.3128	26.5402	26.2696	26.3641	26.3038	26.3957	0.000297912	0.00520485	0.0918761	0.32156	0.492738	0.456208	0.340837
A0A0H3C930	A0A0H3C930_CAUVN			NAD-dependent formate dehydrogenase alpha subunit	0.000348797	21	19	19	19	18	21	19							24.5007	24.3372	24.3133	24.7139	24.8811	24.9283	24.5007	24.3372	24.3133	24.7139	24.8811	24.9283	24.3862	24.844	0.00418259	0.00453496	0.457823	0.00248457	2.60475	0.0186251	1.7299
A0A0H3C932	A0A0H3C932_CAUVN			FrnE protein	0.000348797	13	13	13	13	13	13	13							26.0859	26.0799	26.2568	26.398	26.4333	26.3457	26.0859	26.0799	26.2568	26.398	26.4333	26.3457	26.1432	26.3928	0.00384152	0.00167067	0.249551	0.0127346	1.89501	0.0533583	1.2728
A0A0H3C933	A0A0H3C933_CAUVN			50S ribosomal protein L22	0.000348797	23	22	22	22	21	21	21							30.4436	30.359	30.3882	30.521	30.197	30.5241	30.4436	30.359	30.3882	30.521	30.197	30.5241	30.3974	30.422	0.00141352	0.00618013	0.0246584	0.875605	0.0576918	0.913714	0.0391897
A0A0H3C934	A0A0H3C934_CAUVN			Uncharacterized protein	0.000348797	12	11	12	11	10	12	12							26.6656	26.5115	26.5536	26.532	26.8362	26.7523	26.6656	26.5115	26.5536	26.532	26.8362	26.7523	26.5784	26.7124	0.00299757	0.00588385	0.134066	0.233651	0.631432	0.36592	0.436614
A0A0H3C935	A0A0H3C935_CAUVN			Capsular polysaccharide biosynthesis protein	0.000348797	9	9	9	9	8	7	7							24.3037	24.2998	24.2927	24.0618	23.9428	24.09	24.3037	24.2998	24.2927	24.0618	23.9428	24.09	24.2987	24.0329	0.000228074	0.00325057	-0.265789	0.00451913	2.34495	0.0270046	1.56856
A0A0H3C936	A0A0H3C936_CAUVN			ABC-type multidrug transport system, ATPase component	0.000348797	26	26	25	23	24	25	24							26.297	26.3071	26.2503	26.2769	26.4322	26.3503	26.297	26.3071	26.2503	26.2769	26.4322	26.3503	26.285	26.3545	0.0011527	0.00294776	0.0695379	0.296563	0.527883	0.43281	0.363702
A0A0H3C938	A0A0H3C938_CAUVN			Uncharacterized protein	0.000348797	15	15	14	14	14	14	15							26.3076	26.2807	26.2315	26.3918	26.2888	26.3313	26.3076	26.2807	26.2315	26.3918	26.2888	26.3313	26.2736	26.3379	0.00146914	0.0019647	0.0643366	0.277855	0.556182	0.413905	0.383099
A0A0H3C939	A0A0H3C939_CAUVN			Major facilitator superfamily transporter	0.000348797	4	3	4	3	4	4	3							20.7069	22.468	21.1066	22.5423	22.5234	20.7965	20.7069	22.468	21.1066	22.5423	22.5234	20.7965	21.6351	22.1496	0.0430895	0.0456635	0.514508	0.46822	0.32955	0.587902	0.230695
A0A0H3C940	A0A0H3C940_CAUVN			Glucose-6-phosphate 1-dehydrogenase	0.000348797	63	58	60	59	60	63	63							30.7183	30.6707	30.6463	31.4996	31.4595	31.5143	30.7183	30.6707	30.6463	31.4996	31.4595	31.5143	30.6787	31.4913	0.00119255	0.000899881	0.812578	6.6511e-06	5.17711	0.000956808	3.01918
A0A0H3C941	A0A0H3C941_CAUVN			Uncharacterized protein	0.000348797	5	5	5	5	5	4	4							23.1602	23.1509	22.9644	23.1234	22.9063	22.9285	23.1602	23.1509	22.9644	23.1234	22.9063	22.9285	23.0946	22.9894	0.00478514	0.00519688	-0.105166	0.293971	0.531695	0.42965	0.366885
A0A0H3C942	A0A0H3C942_CAUVN			HesB protein family	0.000348797	9	7	8	8	9	9	9							25.3649	25.3396	25.1972	25.7682	25.5503	25.5882	25.3649	25.3396	25.1972	25.7682	25.5503	25.5882	25.3024	25.6388	0.00357492	0.00454169	0.336318	0.00899601	2.04595	0.0423317	1.37333
A0A0H3C943	A0A0H3C943_CAUVN			Short chain dehydrogenase	0.000348797	8	7	8	7	7	7	7							24.8642	25.2837	25.1392	24.8904	25.2843	24.8502	24.8642	25.2837	25.1392	24.8904	25.2843	24.8502	25.106	25.022	0.00849263	0.00959117	-0.0840541	0.615987	0.210428	0.719049	0.143242
A0A0H3C944	A0A0H3C944_CAUVN			Flagellar basal-body rod protein FlgG	0.000348797	12	11	12	8	4	4	9							24.6553	24.6614	22.511	21.0168	20.99	23.7447	24.6553	24.6614	22.511	21.0168	20.99	23.7447	24.2277	22.5372	0.0517804	0.072214	-1.69043	0.0931006	1.03105	0.195861	0.708051
A0A0H3C945	A0A0H3C945_CAUVN			Protein-export membrane protein SecG	0.000348797	5	5	5	5	5	5	5							25.9736	25.9896	26.0937	26.4056	26.1904	26.1842	25.9736	25.9896	26.0937	26.4056	26.1904	26.1842	26.0199	26.2638	0.00250613	0.00480056	0.24389	0.0292227	1.53428	0.0919602	1.0364
A0A0H3C946	A0A0H3C946_CAUVN			Methylmalonyl-CoA mutase beta subunit	0.000348797	16	16	16	16	13	15	14							25.5604	25.4834	25.4959	24.7817	24.9038	24.8313	25.5604	25.4834	25.4959	24.7817	24.9038	24.8313	25.5136	24.8398	0.00161984	0.00247296	-0.673822	3.99567e-05	4.39841	0.00197884	2.70359
A0A0H3C947	A0A0H3C947_CAUVN			ADP-ribosylglycohydrolase	0.000348797	8	6	8	7	7	6	6							23.3679	23.4898	23.6543	23.6016	23.3604	23.4828	23.3679	23.4898	23.6543	23.6016	23.3604	23.4828	23.5088	23.485	0.0061154	0.00513621	-0.0238193	0.834497	0.078575	0.881783	0.0546385
A0A0H3C950	A0A0H3C950_CAUVN			Pyruvate dehydrogenase E1 component subunit beta	0.000348797	43	43	42	42	41	41	42							30.4272	30.4226	30.5545	30.6501	30.5416	30.5955	30.4272	30.4226	30.5545	30.6501	30.5416	30.5955	30.4694	30.5964	0.00245756	0.00177212	0.127014	0.0917245	1.03751	0.194729	0.710569
A0A0H3C951	A0A0H3C951_CAUVN			UDP-glucose 6-dehydrogenase	0.000348797	7	7	7	7	7	7	7							25.4688	25.46	25.5614	25.4682	25.6198	25.4257	25.4688	25.46	25.5614	25.4682	25.6198	25.4257	25.4975	25.507	0.00220343	0.00399963	0.00953871	0.916695	0.0377749	0.945489	0.0243436
A0A0H3C952	A0A0H3C952_CAUVN			Uncharacterized protein	0.000348797	4	4	4	4	4	4	3							21.2725	20.5308	20.885	20.4724	20.9212	21.0493	21.2725	20.5308	20.885	20.4724	20.9212	21.0493	20.9279	20.8347	0.0177545	0.014555	-0.0931181	0.746824	0.126782	0.814497	0.0891106
A0A0H3C954	A0A0H3C954_CAUVN			Transcriptional regulator IolR	0.000348797	13	12	11	11	10	11	11							24.525	24.4034	24.3726	24.1774	24.2513	24.2252	24.525	24.4034	24.3726	24.1774	24.2513	24.2252	24.4351	24.2183	0.00329902	0.00154698	-0.216863	0.0145944	1.83581	0.0584742	1.23304
A0A0H3C955	A0A0H3C955_CAUVN			Dihydrolipoyl dehydrogenase	0.000348797	45	44	44	45	44	44	43							30.4079	30.3709	30.4962	30.6425	30.5653	30.6607	30.4079	30.3709	30.4962	30.6425	30.5653	30.6607	30.426	30.6234	0.0021151	0.00165346	0.197441	0.0174726	1.75764	0.0663125	1.1784
A0A0H3C958	A0A0H3C958_CAUVN			DD-transpeptidase	0.000348797	42	40	41	39	38	41	38							26.7862	26.9962	26.9909	26.9516	26.9157	26.8833	26.7862	26.9962	26.9909	26.9516	26.9157	26.8833	26.9277	26.9171	0.00444724	0.00126903	-0.0105477	0.923172	0.0347173	0.949609	0.0224553
A0A0H3C959	A0A0H3C959_CAUVN			Competence/damage-inducible protein CinA	0.000348797	8	8	8	8	8	8	8							25.926	25.9568	25.9956	26.006	25.9894	26.0179	25.926	25.9568	25.9956	26.006	25.9894	26.0179	25.9597	26.0045	0.00134477	0.000551778	0.0447331	0.373511	0.427697	0.506453	0.295461
A0A0H3C960	A0A0H3C960_CAUVN			Malonate-semialdehyde dehydrogenase IolA	0.000348797	31	15	15	16	14	14	14							25.205	25.0306	24.5972	24.8106	24.5288	24.9931	25.205	25.0306	24.5972	24.8106	24.5288	24.9931	24.9662	24.79	0.0125482	0.00943984	-0.176221	0.435161	0.36135	0.559245	0.252398
A0A0H3C961	A0A0H3C961_CAUVN			Uracil DNA glycosylase superfamily protein	0.000348797	3	3	3	3	3	3	3							21.6413	21.7776	21.4209	21.475	21.6783	21.1554	21.6413	21.7776	21.4209	21.475	21.6783	21.1554	21.6207	21.452	0.00832658	0.0122954	-0.168672	0.324693	0.488527	0.458387	0.338767
A0A0H3C962	A0A0H3C962_CAUVN			MarR-family transcriptional regulator	0.000348797	4	4	3	4	4	4	4							23.2172	22.9466	23.0589	23.0165	23.1469	23.1979	23.2172	22.9466	23.0589	23.0165	23.1469	23.1979	23.0785	23.1224	0.00589105	0.00404593	0.0439336	0.635295	0.197024	0.733814	0.134414
A0A0H3C963	A0A0H3C963_CAUVN			Nitrogen assimilation regulatory protein ntrX	0.000348797	29	29	29	29	27	28	28							28.0342	28.0135	28.0044	28.2506	28.2423	28.1546	28.0342	28.0135	28.0044	28.2506	28.2423	28.1546	28.0174	28.2165	0.000545387	0.00188636	0.19908	0.00939573	2.02707	0.0434646	1.36186
A0A0H3C964	A0A0H3C964_CAUVN			ABC-type transporter, permease component	0.000348797	26	26	26	25	24	24	25							26.8145	26.9614	26.7783	26.4938	26.6881	26.8628	26.8145	26.9614	26.7783	26.4938	26.6881	26.8628	26.8536	26.6894	0.00361038	0.00691664	-0.164226	0.183731	0.735817	0.309799	0.508921
A0A0H3C965	A0A0H3C965_CAUVN			ThiaminS ubiquitin-like sulfur carrier protein ThiS	0.00692384	1	1	1	1	1	1	1							23.9597	24.0268	23.9797	24.5035	24.1318	24.3769	23.9597	24.0268	23.9797	24.5035	24.1318	24.3769	23.989	24.3455	0.00143655	0.00776428	0.356534	0.017907	1.74698	0.0672012	1.17262
A0A0H3C967	A0A0H3C967_CAUVN			Aryl-alcohol dehydrogenase	0.000348797	6	1	1	1	0	1	1							17.7193	14.9465	19.4487	NA	19.4907	17.6486	17.7193	14.9465	19.4487	18.8148	19.4907	17.6486	18.2921	18.8354	0.13074	0.0499623	0.543336	0.337008	0.472359	0.470038	0.327867
A0A0H3C970	A0A0H3C970_CAUVN			Vitamin B12-dependent ribonucleotide reductase	0.000348797	29	29	26	28	26	28	28							26.2509	26.0214	26.2974	26.5463	26.5562	26.7507	26.2509	26.0214	26.2974	26.5463	26.5562	26.7507	26.1948	26.6209	0.00564149	0.00433001	0.426049	0.00709595	2.14899	0.0365817	1.43674
A0A0H3C971	A0A0H3C971_CAUVN			Uncharacterized protein	0.000348797	11	11	11	11	10	10	10							26.7093	26.5218	26.1212	25.4939	25.5958	25.5462	26.7093	26.5218	26.1212	25.4939	25.5958	25.5462	26.4711	25.5459	0.011358	0.00199446	-0.925157	0.00164381	2.78415	0.0148237	1.82904
A0A0H3C972	A0A0H3C972_CAUVN			Trans-feruloyl-CoA hydratase	0.000348797	2	2	2	2	1	1	2							19.3713	19.5319	19.4939	17.1461	18.7323	19.2169	19.3713	19.5319	19.4939	17.1461	18.7323	19.2169	19.4673	18.5974	0.00431261	0.0589765	-0.869899	0.0922439	1.03506	0.195094	0.709757
A0A0H3C973	A0A0H3C973_CAUVN			SalR-family ligand-binding transcriptional regulator	0.000348797	6	6	5	4	5	4	4							23.1978	23.3809	23.4542	23.2278	23.3794	23.3755	23.1978	23.3809	23.4542	23.2278	23.3794	23.3755	23.3483	23.3293	0.00565788	0.003706	-0.0189946	0.857682	0.0666735	0.901101	0.0452263
A0A0H3C974	A0A0H3C974_CAUVN			O-phosphoserine phosphohydrolase	0.000348797	19	18	17	18	17	16	17							27.1478	27.154	27.1774	27.3184	27.2375	27.2429	27.1478	27.154	27.1774	27.3184	27.2375	27.2429	27.1598	27.2668	0.000575064	0.00165939	0.106947	0.0756365	1.12127	0.171159	0.766599
A0A0H3C975	A0A0H3C975_CAUVN			Parvulin-like PPIase	0.000348797	59	57	57	57	59	57	57							29.9118	29.9769	30.0419	30.1648	29.9316	29.9231	29.9118	29.9769	30.0419	30.1648	29.9316	29.9231	29.9779	30.0109	0.0021698	0.0045707	0.0330341	0.744573	0.128093	0.813216	0.089794
A0A0H3C976	A0A0H3C976_CAUVN			Glutathione S-transferase	0.000348797	10	10	8	9	9	9	9							26.2642	26.1405	26.0197	26.5218	26.6237	26.4375	26.2642	26.1405	26.0197	26.5218	26.6237	26.4375	26.1449	26.5297	0.00467661	0.00351357	0.384741	0.00558074	2.25331	0.031106	1.50716
A0A0H3C977	A0A0H3C977_CAUVN			Oxidoreductase	0.000348797	21	18	21	21	21	21	21							26.0859	26.2304	26.4105	26.4794	26.3647	26.5468	26.0859	26.2304	26.4105	26.4794	26.3647	26.5468	26.2484	26.4656	0.00619717	0.00347935	0.217177	0.077242	1.11215	0.173881	0.759748
A0A0H3C978	A0A0H3C978_CAUVN			PaaI-family thioesterase	0.000348797	5	5	5	5	5	5	5							24.3092	24.2352	24.1644	24.0857	24.1222	24.2095	24.3092	24.2352	24.1644	24.0857	24.1222	24.2095	24.2375	24.1401	0.00298792	0.002636	-0.0974369	0.184035	0.735101	0.310077	0.50853
A0A0H3C980	A0A0H3C980_CAUVN			Methyltransferase	0.000348797	2	2	2	2	2	2	2							22.5064	22.7496	22.9896	22.9109	22.7837	22.8409	22.5064	22.7496	22.9896	22.9109	22.7837	22.8409	22.762	22.8461	0.0106204	0.0027873	0.0841135	0.490578	0.309292	0.611149	0.213853
A0A0H3C981	A0A0H3C981_CAUVN			Valine--tRNA ligase	0.000348797	67	67	65	63	63	63	65							29.5669	29.5646	29.6305	29.7894	29.7379	29.8075	29.5669	29.5646	29.6305	29.7894	29.7379	29.8075	29.5877	29.7786	0.00126511	0.00121332	0.190899	0.0102698	1.98844	0.0462372	1.33501
A0A0H3C982	A0A0H3C982_CAUVN			Uncharacterized protein	0.000348797	8	8	8	8	7	7	7							24.5602	24.5014	24.5431	24.3404	24.3521	24.326	24.5602	24.5014	24.5431	24.3404	24.3521	24.326	24.5351	24.3395	0.00123411	0.00053771	-0.195606	0.00639838	2.19393	0.0340778	1.46753
A0A0H3C983	A0A0H3C983_CAUVN			Isocitrase	0.000348797	20	7	8	11	12	10	10							21.7945	21.7745	24.742	23.2505	22.5996	24.0571	21.7945	21.7745	24.742	23.2505	22.5996	24.0571	23.4876	23.4251	0.0749898	0.0313329	-0.0624947	0.586271	0.231901	0.69458	0.158278
A0A0H3C985	A0A0H3C985_CAUVN	A0A0H3C985;A0A0H3CCE2	CCNA_01983;CCNA_03757	Citrate synthase	0.000348797	52	52	52	52	49	52	52	1	1	1	1	1	1	31.811	31.9555	31.8595	31.794	31.7622	31.6719	31.811	31.9555	31.8595	31.794	31.7622	31.6719	31.8766	31.7436	0.0023072	0.00199448	-0.132941	0.0888946	1.05112	0.191139	0.71865
A0A0H3C986	A0A0H3C986_CAUVN			Trans-isoprenyl diphosphate synthase	0.000348797	30	30	28	29	25	29	28							27.1085	27.0328	27.1581	27.204	27.0409	27.0849	27.1085	27.0328	27.1581	27.204	27.0409	27.0849	27.1007	27.1116	0.00232877	0.00311306	0.0108623	0.885813	0.0526581	0.921501	0.035504
A0A0H3C987	A0A0H3C987_CAUVN			Uncharacterized protein	0.000348797	8	7	7	8	7	7	7							25.33	25.3291	24.9984	25.7609	25.789	25.7702	25.33	25.3291	24.9984	25.7609	25.789	25.7702	25.2274	25.7734	0.007583	0.000555145	0.545993	0.00241094	2.61781	0.0184391	1.73426
A0A0H3C988	A0A0H3C988_CAUVN			Histidine kinase	0.000348797	23	22	22	23	20	22	22							27.0488	27.169	27.0819	27.0581	27.2164	27.2448	27.0488	27.169	27.0819	27.0581	27.2164	27.2448	27.1008	27.1754	0.00229145	0.00370174	0.0746187	0.354174	0.450783	0.485683	0.313647
A0A0H3C990	A0A0H3C990_CAUVN			YceI-like domain protein	0.000348797	19	19	19	19	18	17	18							27.2208	27.2309	27.1081	26.7834	26.7771	26.8386	27.2208	27.2309	27.1081	26.7834	26.7771	26.8386	27.1876	26.8	0.00250578	0.00126171	-0.387682	0.000735251	3.13356	0.0102326	1.99001
A0A0H3C992	A0A0H3C992_CAUVN			OmpH-like outer membrane protein	0.000348797	22	21	22	22	21	21	20							31.0007	30.9322	31.0415	31.1064	30.9086	30.997	31.0007	30.9322	31.0415	31.1064	30.9086	30.997	30.9921	31.0063	0.00178177	0.00319535	0.0141555	0.864575	0.0631976	0.906588	0.0425901
A0A0H3C993	A0A0H3C993_CAUVN			Type IV secretory pathway, VirB10 channel protein	0.000348797	11	11	11	11	11	11	11							24.6583	24.6742	24.5427	24.9293	24.7698	24.7488	24.6583	24.6742	24.5427	24.9293	24.7698	24.7488	24.6263	24.8183	0.00291491	0.0039763	0.192003	0.0453484	1.34344	0.121776	0.91444
A0A0H3C994	A0A0H3C994_CAUVN			Ubiquinol oxidase subunit 2	0.000348797	12	12	11	10	11	10	11							27.318	27.4484	27.2727	27.1859	27.0625	27.1979	27.318	27.4484	27.2727	27.1859	27.0625	27.1979	27.3483	27.15	0.00333438	0.00276125	-0.198282	0.0375032	1.42593	0.107482	0.968665
A0A0H3C995	A0A0H3C995_CAUVN			Quinone oxidoreductase	0.00722022	3	3	2	1	1	2	2							20.2687	18.0053	18.0446	18.7815	18.6395	19.6723	20.2687	18.0053	18.0446	18.7815	18.6395	19.6723	19.192	19.1075	0.0690141	0.0294182	-0.0845494	0.726121	0.138991	0.802052	0.0957975
A0A0H3C996	A0A0H3C996_CAUVN			Tetratricopeptide repeat family protein	0.000348797	27	27	27	25	23	25	25							26.7431	26.6397	26.6831	26.7128	26.7998	26.6514	26.7431	26.6397	26.6831	26.7128	26.7998	26.6514	26.6893	26.7226	0.00194578	0.00279138	0.0333268	0.618355	0.208762	0.720699	0.142246
A0A0H3C997	A0A0H3C997_CAUVN			Uridylate kinase	0.000348797	24	22	23	23	24	23	23							27.9802	27.8582	27.905	27.9722	27.9549	28.1059	27.9802	27.8582	27.905	27.9722	27.9549	28.1059	27.9153	28.0126	0.00220494	0.00295077	0.0972825	0.200855	0.697117	0.329774	0.481784
A0A0H3C998	A0A0H3C998_CAUVN			Glycosyltransferase hfsG	0.000348797	12	11	11	9	10	10	9							25.4295	25.4833	25.202	25.6037	25.4434	25.3925	25.4295	25.4833	25.202	25.6037	25.4434	25.3925	25.3767	25.4827	0.00588677	0.00432575	0.106045	0.329927	0.481582	0.463586	0.33387
A0A0H3C999	A0A0H3C999_CAUVN			Ferrichrome-iron receptor	0.000348797	65	64	64	65	62	65	64							31.5091	31.5243	31.4688	31.7444	31.6076	31.6012	31.5091	31.5243	31.4688	31.7444	31.6076	31.6012	31.5009	31.6526	0.000910352	0.00255479	0.15167	0.0503868	1.29768	0.130884	0.883113
A0A0H3C9A2	A0A0H3C9A2_CAUVN			Lipoprotein releasing system transmembrane protein lolE	0.000348797	8	7	8	8	8	7	7							25.6825	25.8914	25.762	25.9597	25.7301	25.9238	25.6825	25.8914	25.762	25.9597	25.7301	25.9238	25.7812	25.8747	0.00409022	0.0047738	0.0934393	0.35177	0.453742	0.483263	0.315816
A0A0H3C9A3	A0A0H3C9A3_CAUVN			Uncharacterized protein	0.000348797	15	14	14	14	14	14	14							27.1762	27.1094	27.0902	27.0406	26.7309	26.7573	27.1762	27.1094	27.0902	27.0406	26.7309	26.7573	27.1257	26.8499	0.00166339	0.00639628	-0.27587	0.0308633	1.51056	0.095433	1.0203
A0A0H3C9A4	A0A0H3C9A4_CAUVN			Uncharacterized protein	0.000348797	12	11	11	11	12	10	12							24.9615	24.9725	24.7754	25.6454	25.0832	25.4052	24.9615	24.9725	24.7754	25.6454	25.0832	25.4052	24.9059	25.3961	0.00444782	0.0111148	0.490135	0.0256335	1.59119	0.085285	1.06913
A0A0H3C9A5	A0A0H3C9A5_CAUVN			Polysaccharide secretin protein hfsD	0.000348797	9	9	9	9	9	9	9							25.0218	24.9925	24.9611	24.964	24.9707	25.0082	25.0218	24.9925	24.9611	24.964	24.9707	25.0082	24.992	24.9811	0.00121563	0.000953457	-0.0108795	0.825109	0.0834884	0.875538	0.0577252
A0A0H3C9A6	A0A0H3C9A6_CAUVN			Cyclohexanone monooxygenase	0.000348797	5	5	5	3	1	0	2							22.3429	22.0216	21.4566	19.3405	NA	19.4559	22.3429	22.0216	21.4566	19.3405	20.7862	19.4559	21.9853	20.0208	0.0204517	0.0404528	-1.96453	0.00498724	2.30214	0.0285709	1.54408
A0A0H3C9A7	A0A0H3C9A7_CAUVN			Type III pantothenate kinase	0.000348797	10	10	9	9	9	9	9							25.7942	25.5771	25.6181	26.0271	26.0289	25.9414	25.7942	25.5771	25.6181	26.0271	26.0289	25.9414	25.6662	25.9997	0.0044957	0.00192313	0.333456	0.00542935	2.26525	0.0304305	1.51669
A0A0H3C9A8	A0A0H3C9A8_CAUVN			Methylenetetrahydrofolate reductase	0.000348797	25	25	25	25	24	25	25							28.5168	28.4805	28.6675	28.5352	28.6621	28.6429	28.5168	28.4805	28.6675	28.5352	28.6621	28.6429	28.5572	28.6145	0.00347298	0.00239042	0.0572627	0.457778	0.339345	0.578418	0.237758
A0A0H3C9A9	A0A0H3C9A9_CAUVN			Cation/multidrug efflux pump acrB4	0.000348797	17	15	16	17	13	16	17							23.9324	24.1706	24.1538	23.5709	23.7688	24.4107	23.9324	24.1706	24.1538	23.5709	23.7688	24.4107	24.0896	23.963	0.00551824	0.0183564	-0.126604	0.495256	0.30517	0.615201	0.210983
A0A0H3C9B2	A0A0H3C9B2_CAUVN			NADH-quinone oxidoreductase subunit J	0.000348797	4	4	4	4	4	4	4							29.3996	29.3547	29.3232	29.4966	29.2853	29.4855	29.3996	29.3547	29.3232	29.4966	29.2853	29.4855	29.3595	29.4257	0.00130844	0.0040423	0.0662	0.434249	0.362261	0.558716	0.252809
A0A0H3C9B4	A0A0H3C9B4_CAUVN			3-hydroxyisobutyrate dehydrogenase	0.000348797	15	15	14	13	10	12	11							25.9316	25.9384	25.7489	25.1599	24.9814	25.1845	25.9316	25.9384	25.7489	25.1599	24.9814	25.1845	25.8756	25.1114	0.00415414	0.00441445	-0.764257	0.000209633	3.67854	0.00519098	2.28475
A0A0H3C9B5	A0A0H3C9B5_CAUVN			DNA recombination-mediator protein A, SMF family	0.000348797	21	21	21	21	20	21	20							26.798	26.8443	26.6977	27.0025	27.0847	27.0029	26.798	26.8443	26.6977	27.0025	27.0847	27.0029	26.7813	27.0306	0.0027975	0.00175233	0.249271	0.00786631	2.10423	0.0392176	1.40652
A0A0H3C9B8	A0A0H3C9B8_CAUVN			Thiamine-monophosphate kinase	0.000348797	11	11	10	10	10	11	9							25.7318	25.6309	25.6906	25.8554	25.808	25.7308	25.7318	25.6309	25.6906	25.8554	25.808	25.7308	25.685	25.799	0.00197431	0.00243956	0.113947	0.104338	0.981557	0.211234	0.675236
A0A0H3C9B9	A0A0H3C9B9_CAUVN			NADH-quinone oxidoreductase subunit F	0.000348797	30	28	27	27	26	29	29							27.9914	28.0062	28.0656	28.2783	28.2888	28.2701	27.9914	28.0062	28.0656	28.2783	28.2888	28.2701	28.0215	28.2791	0.00140115	0.000332937	0.257624	0.00208483	2.68093	0.0171148	1.76663
A0A0H3C9C0	A0A0H3C9C0_CAUVN			Uncharacterized protein	0.000348797	3	3	3	3	3	3	3							22.0841	22.0298	21.7163	22.3533	22.0451	22.2826	22.0841	22.0298	21.7163	22.3533	22.0451	22.2826	21.9523	22.2329	0.00904649	0.00726429	0.280637	0.0827065	1.08246	0.181846	0.740296
A0A0H3C9C1	A0A0H3C9C1_CAUVN			Uncharacterized protein	0.0010142	1	1	1	1	0	1	1							17.5802	18.0779	17.1494	NA	16.7007	18.4029	17.5802	18.0779	17.1494	21.0091	16.7007	18.4029	17.6523	19.7047	0.0263983	0.116013	2.05239	0.358698	0.445272	0.490995	0.308923
A0A0H3C9C3	A0A0H3C9C3_CAUVN			Aminotransferase class I family protein	0.000348797	21	21	19	20	18	20	19							27.1902	27.0768	27.1757	27.1832	27.2265	27.1836	27.1902	27.0768	27.1757	27.1832	27.2265	27.1836	27.1484	27.1979	0.00227326	0.000914234	0.0494701	0.389821	0.409135	0.521956	0.282366
A0A0H3C9C4	A0A0H3C9C4_CAUVN			Ubiquinol-cytochrome C reductase chaperone	0.000348797	12	12	12	12	11	12	11							26.0826	26.0381	26.1601	26.1731	26.2099	26.1757	26.0826	26.0381	26.1601	26.1731	26.2099	26.1757	26.0945	26.1863	0.00236594	0.000785565	0.0918211	0.138045	0.85998	0.254444	0.594408
A0A0H3C9C5	A0A0H3C9C5_CAUVN			NADH-quinone oxidoreductase subunit D	0.000348797	40	40	39	38	36	35	39							28.7532	28.708	28.7178	28.9183	28.8581	28.8726	28.7532	28.708	28.7178	28.9183	28.8581	28.8726	28.7265	28.8832	0.000826872	0.00108825	0.156741	0.0178317	1.74881	0.0670021	1.17391
A0A0H3C9C6	A0A0H3C9C6_CAUVN			N-acyl-L-amino acid amidohydrolase	0.000348797	27	27	25	25	24	22	22							28.125	28.0664	28.1654	28.0484	27.8448	27.9435	28.125	28.0664	28.1654	28.0484	27.8448	27.9435	28.1195	27.948	0.00176911	0.00364348	-0.17155	0.0529651	1.27601	0.134831	0.870212
A0A0H3C9C8	A0A0H3C9C8_CAUVN			Conserved hypothetical cytosolic protein	0.000348797	9	9	8	8	9	8	7							24.8643	24.3331	24.138	25.0551	24.1666	24.0429	24.8643	24.3331	24.138	25.0551	24.1666	24.0429	24.4787	24.4958	0.0153775	0.022611	0.017106	0.946049	0.0240863	0.961971	0.0168382
A0A0H3C9C9	A0A0H3C9C9_CAUVN			Uncharacterized protein	0.000348797	3	3	3	3	3	3	3							24.6565	24.7196	24.6998	25.0282	24.7494	24.7638	24.6565	24.7196	24.6998	25.0282	24.7494	24.7638	24.6922	24.8529	0.00130613	0.00631687	0.160748	0.140383	0.852686	0.25735	0.589476
A0A0H3C9D0	A0A0H3C9D0_CAUVN			Response regulator receiver protein DivK	0.000348797	6	5	5	5	5	5	5							25.3235	25.2995	25.3389	25.3424	25.2653	25.3691	25.3235	25.2995	25.3389	25.3424	25.2653	25.3691	25.3207	25.3263	0.000783104	0.00212881	0.00554579	0.926033	0.0333733	0.950577	0.0220129
A0A0H3C9D3	A0A0H3C9D3_CAUVN			Isovaleryl-CoA dehydrogenase	0.000348797	33	21	19	22	17	17	17							26.1757	26.0588	26.1881	25.8108	25.9112	25.9336	26.1757	26.0588	26.1881	25.8108	25.9112	25.9336	26.142	25.8862	0.00272892	0.00252772	-0.255831	0.00875832	2.05758	0.0420067	1.37668
A0A0H3C9D4	A0A0H3C9D4_CAUVN			Poly(3-hydroxyalkanoate) polymerase	0.000348797	45	39	41	41	38	41	41							27.7557	27.796	27.8416	27.9224	27.865	27.9097	27.7557	27.796	27.8416	27.9224	27.865	27.9097	27.7982	27.8993	0.00154697	0.0010806	0.101065	0.0930025	1.03151	0.195861	0.708051
A0A0H3C9D5	A0A0H3C9D5_CAUVN			Thymidylate kinase	0.000348797	9	6	6	8	7	7	7							24.3572	24.4205	24.8672	24.6505	24.6901	24.6792	24.3572	24.4205	24.8672	24.6505	24.6901	24.6792	24.5667	24.6734	0.011325	0.000830212	0.106628	0.423291	0.373361	0.547884	0.261312
A0A0H3C9D6	A0A0H3C9D6_CAUVN			ATP-dependent clp protease ATP-binding subunit ClpA	0.000348797	60	52	57	55	60	56	57							28.1911	28.3367	28.3223	28.7643	28.676	28.6973	28.1911	28.3367	28.3223	28.7643	28.676	28.6973	28.2848	28.713	0.00283598	0.00160466	0.428184	0.000706654	3.15079	0.00996025	2.00173
A0A0H3C9D7	A0A0H3C9D7_CAUVN			Glutamine synthetase	0.000348797	62	59	60	61	60	62	61							31.5494	31.5141	31.8671	31.8683	31.7241	31.8971	31.5494	31.5141	31.8671	31.8683	31.7241	31.8971	31.6525	31.8318	0.00614395	0.00291133	0.17932	0.160681	0.794035	0.282548	0.548907
A0A0H3C9D9	A0A0H3C9D9_CAUVN			Fructose-1,6-bisphosphatase class 1	0.000348797	16	16	16	16	14	14	15							26.8667	26.8758	26.886	26.7589	26.7413	26.8243	26.8667	26.8758	26.886	26.7589	26.7413	26.8243	26.8762	26.7753	0.000359505	0.00163409	-0.100901	0.0835755	1.07792	0.182811	0.737997
A0A0H3C9E0	A0A0H3C9E0_CAUVN			DNA topoisomerase 4 subunit B	0.000348797	38	31	31	29	29	31	31							26.9913	27.246	26.4085	26.5556	26.4427	26.6789	26.9913	27.246	26.4085	26.5556	26.4427	26.6789	26.9227	26.5623	0.0159703	0.00444801	-0.360407	0.205293	0.687625	0.333975	0.476286
A0A0H3C9E1	A0A0H3C9E1_CAUVN			Urea carboxylase	0.000348797	17	11	14	14	10	11	10							26.5105	26.5112	26.5871	26.3988	26.3619	26.4006	26.5105	26.5112	26.5871	26.3988	26.3619	26.4006	26.5367	26.3872	0.00165782	0.000828278	-0.149514	0.02554	1.59278	0.0851548	1.06979
A0A0H3C9E2	A0A0H3C9E2_CAUVN			Enantioselective peptide amidase	0.000348797	24	22	21	21	19	19	18							25.9955	26.0215	26.0619	25.4271	25.4243	25.4309	25.9955	26.0215	26.0619	25.4271	25.4243	25.4309	26.0265	25.4274	0.001285	0.000129255	-0.599108	2.50633e-05	4.60096	0.00155807	2.80741
A0A0H3C9E3	A0A0H3C9E3_CAUVN			ThiJ/PfpI family	0.000348797	4	4	4	4	4	4	4							24.8469	24.6605	24.6258	24.8888	24.6567	24.5696	24.8469	24.6605	24.6258	24.8888	24.6567	24.5696	24.7143	24.7114	0.00481277	0.00667857	-0.00294852	0.958068	0.0186038	0.970923	0.0128151
[truncated: 1,590 more rows]

## Sheet: Fig. 8D
								Number of peptide precursors measured																Number of Razor peptide precursors																Normalized Log2 Quantity/Intensity
[truncated: 2,975 more rows]
[truncated: 45 more columns]

## Sheet: Fig. 8-fig. suppl. 1C
								Number of peptide precursors measured						Number of Razor peptide precursors						Normalized Log2 Quantity/Intensity						Normalized and Imputed Log2 Quantity/Intensity						Imputed Log2 MeanIntensity		Coefficient of Variation (CV)		log2 Ratio	p Value	-log10 (p Value)	q Value	-log10 (q Value)
[truncated: 2,938 more rows]

[truncated: 1 more sheets: Fig. 8-fig. suppl. 2]
